# Supplementary material for: Reduced YTHDF2 inhibits PD-L1 expression by stabilizing m6A-containing SPOP mRNA in colorectal cancer
Source: Cell Death Dis. 2026 Mar 24;17(1):351. doi: 10.1038/s41419-026-08615-2 (PMC13040070; doi:10.1038/s41419-026-08615-2)
Supplement: Supplementary file 3 — Original m6A and RIP peaks [file 41419_2026_8615_MOESM3_ESM.xlsx]

## Sheet: differential_expression
transcriptId	geneId	geneName	FPKM.shY2_1_input	FPKM.shY2_2_input	FPKM.shNC1_input	FPKM.shNC2_input	fc	log2(fc)	pval	regulation	significant
ENST00000371582	ENSG00000000419	DPM1	0.014917	0.087091	1.09409	1.7635	0.0356973	-4.80804	0.00474174	down	yes
ENST00000496973	ENSG00000000460	C1orf112	1.30006	1.50868	0.20014	0.757196	2.93391	1.55282	0.30434	up	no
ENST00000394503	ENSG00000001631	KRIT1	1.72798	7.40481	1.70035	1.20416	3.14435	1.65276	0.190013	up	no
ENST00000486261	ENSG00000001631	KRIT1	0.364995	1.48299	0.192216	0.173511	5.0529	2.33711	0.100766	up	no
ENST00000226299	ENSG00000002549	LAP3	1.17357	7.13794	1.48326	2.28453	2.20594	1.14139	0.398111	up	no
ENST00000606142	ENSG00000002549	LAP3	35.0283	22.4878	37.4925	39.6703	0.745387	-0.423938	0.465574	down	no
ENST00000618908	ENSG00000002549	LAP3	7.7352	10.155	5.82447	3.16708	1.98967	0.992532	0.336568	up	no
ENST00000381187	ENSG00000002586	CD99	1.91867	0.776584	1.05274	4.00584	0.53281	-0.908307	0.496099	down	no
ENST00000265854	ENSG00000002822	MAD1L1	2.47153	0.625294	0.390632	0.274876	4.65332	2.21826	0.119659	up	no
ENST00000433206	ENSG00000002834	LASP1	0.054643	0.027289	8.42648	1.60055	0.00817111	-6.93525	6.78997e-06	down	yes
ENST00000584106	ENSG00000002834	LASP1	0.246067	0.569701	1.15664	0.740554	0.429986	-1.21764	0.386083	down	no
ENST00000402384	ENSG00000003147	ICA1	0.231052	0.343253	0.055823	1.4592	0.379073	-1.39945	0.364161	down	no
ENST00000406470	ENSG00000003147	ICA1	1.02376	0.774076	0.625695	0	2.87334	1.52273	0.412464	up	no
ENST00000002501	ENSG00000003249	DBNDD1	16.1735	11.4648	18.7246	23.9476	0.647689	-0.626627	0.347198	down	no
ENST00000392973	ENSG00000003249	DBNDD1	4.9466	6.62424	2.73158	0.280859	3.84102	1.94149	0.14075	up	no
ENST00000439495	ENSG00000003393	ALS2	0.164095	2.05722	0.299123	0.020321	6.95368	2.79778	0.108967	up	no
ENST00000482789	ENSG00000003393	ALS2	0.320182	4.19234	0.985447	1.28585	1.98676	0.990416	0.504319	up	no
ENST00000346817	ENSG00000003400	CASP10	0.205479	0.201478	0.780896	0.609039	0.292789	-1.77207	0.168876	down	no
ENST00000336237	ENSG00000003509	NDUFAF7	0.026339	0.655496	0.094311	3.06625	0.215732	-2.21269	0.21587	down	no
ENST00000474154	ENSG00000003509	NDUFAF7	0.134217	0.217102	0.588454	0.760874	0.260366	-1.94139	0.12969	down	no
ENST00000585482	ENSG00000004139	SARM1	0.095845	0.232526	0	0.11378	2.88602	1.52908	0.429791	up	no
ENST00000373449	ENSG00000004455	AK2	25.858	4.7185	27.4549	28.5837	0.545632	-0.873999	0.23915	down	no
ENST00000467905	ENSG00000004455	AK2	1.98354	1.51958	2.30298	7.82601	0.345851	-1.53178	0.251015	down	no
ENST00000672715	ENSG00000004455	AK2	2.1667	14.11	2.91028	3.73143	2.45067	1.29318	0.156277	up	no
ENST00000314737	ENSG00000004777	ARHGAP33	0.024544	0.075563	0.427173	0.421129	0.118009	-3.08304	0.0381615	down	yes
ENST00000416240	ENSG00000004864	SLC25A13	0.230504	0.21555	0.480325	0.501934	0.45411	-1.13889	0.381282	down	no
ENST00000596842	ENSG00000005007	UPF1	0.634921	0.586493	0.153654	0.218344	3.28339	1.71519	0.187566	up	no
ENST00000262327	ENSG00000005156	LIG3	0.210861	2.14895	0.292444	0.441542	3.21506	1.68484	0.262596	up	no
ENST00000348433	ENSG00000005189	REXO5	0.583378	0	0.653695	1.16079	0.321511	-1.63706	0.367665	down	no
ENST00000566993	ENSG00000005189	REXO5	1.81728	1.09501	0.041804	1.31206	2.1511	1.10507	0.49005	up	no
ENST00000394391	ENSG00000005194	CIAPIN1	15.2365	19.9825	25.349	30.8793	0.626357	-0.674944	0.278036	down	no
ENST00000567518	ENSG00000005194	CIAPIN1	13.913	11.9014	11.1336	3.85936	1.72176	0.783884	0.406312	up	no
ENST00000569370	ENSG00000005194	CIAPIN1	5.52414	1.32631	1.27746	1.27478	2.68409	1.42443	0.302539	up	no
ENST00000584955	ENSG00000005243	COPZ2	1.66683	2.19542	0.86445	0.362419	3.14805	1.65446	0.250613	up	no
ENST00000647701	ENSG00000005302	MSL3	0.811279	1.5098	0.445759	0.331543	2.98607	1.57825	0.246279	up	no
ENST00000649078	ENSG00000005302	MSL3	1.20874	2.02101	0.011704	1.07779	2.96444	1.56776	0.356237	up	no
ENST00000321027	ENSG00000005436	GCFC2	6.48318	8.40797	9.85517	10.6345	0.726765	-0.46044	0.465796	down	no
ENST00000409857	ENSG00000005436	GCFC2	1.6527	3.57996	0.704487	1.02068	3.03314	1.60081	0.227951	up	no
ENST00000331536	ENSG00000005469	CROT	1.74952	1.13401	0.265129	1.19735	1.97168	0.979423	0.479622	up	no
ENST00000318622	ENSG00000005486	RHBDD2	1.06268	0.137926	1.16689	2.06975	0.370941	-1.43074	0.312154	down	no
ENST00000566034	ENSG00000005513	SOX8	0.688144	1.04954	0.566437	0.1467	2.43667	1.28491	0.361477	up	no
ENST00000369751	ENSG00000005700	IBTK	0.227115	0.274538	0.143971	0.019361	3.07137	1.61888	0.30299	up	no
ENST00000343338	ENSG00000005801	ZNF195	0.020985	0.626038	0.015437	2.42615	0.265001	-1.91593	0.323703	down	no
ENST00000429541	ENSG00000005801	ZNF195	3.17903	0.216588	0.360636	0.212984	5.91963	2.56551	0.104953	up	no
ENST00000304543	ENSG00000005889	ZFX	0.961808	1.07474	2.80535	2.81768	0.36218	-1.46522	0.225744	down	no
ENST00000379177	ENSG00000005889	ZFX	4.92434	5.26882	3.10754	3.82062	1.47126	0.557057	0.457103	up	no
ENST00000379188	ENSG00000005889	ZFX	0.148086	0.082038	0.586851	0.300027	0.259477	-1.94632	0.142147	down	no
ENST00000200639	ENSG00000005893	LAMP2	1.08506	1.20615	0.686453	0.458999	2.00026	1.00019	0.431707	up	no
ENST00000007414	ENSG00000006025	OSBPL7	0.275134	1.33439	0.20113	0.333623	3.00985	1.58969	0.265541	up	no
ENST00000583167	ENSG00000006025	OSBPL7	0.794264	0.267727	0.986126	1.10828	0.50706	-0.979772	0.446723	down	no
ENST00000395149	ENSG00000006042	TMEM98	0.627187	0.213479	1.38176	1.99263	0.249131	-2.00502	0.16746	down	no
ENST00000344686	ENSG00000006062	MAP3K14	0.126845	0.741988	0.909577	2.05656	0.292917	-1.77144	0.199081	down	no
ENST00000534983	ENSG00000006118	TMEM132A	0.513359	0.53169	1.29184	1.12946	0.431606	-1.21221	0.33311	down	no
ENST00000610402	ENSG00000006125	AP2B1	39.8748	33.6639	37.2737	7.43871	1.6447	0.717828	0.337242	up	no
ENST00000621914	ENSG00000006125	AP2B1	11.4072	14.7905	12.1112	40.9257	0.49395	-1.01756	0.118002	down	no
ENST00000575332	ENSG00000006194	ZNF263	0.446687	0.577459	0.28737	0.192462	2.13438	1.09382	0.437041	up	no
ENST00000575823	ENSG00000006194	ZNF263	1.08391	1.0363	0.569917	0.342834	2.32288	1.21591	0.395275	up	no
ENST00000006658	ENSG00000006282	SPATA20	0.671971	0.709676	1.84895	0.954989	0.492752	-1.02107	0.424314	down	no
ENST00000405218	ENSG00000006468	ETV1	0.463281	0.431254	0.685756	0.974345	0.538844	-0.892061	0.472763	down	no
ENST00000649014	ENSG00000006530	AGK	0.99376	0.611603	0.190908	4.8e-05	8.40698	3.07159	0.0746514	up	no
ENST00000424760	ENSG00000006576	PHTF2	0.556931	0.534008	0.179362	0.115658	3.69785	1.88669	0.20445	up	no
ENST00000440082	ENSG00000006625	GGCT	9.43045	8.43514	4.34217	5.19874	1.87253	0.904986	0.457311	up	no
ENST00000413643	ENSG00000006634	DBF4	0.2185	0.049508	2.97348	1.12959	0.0653189	-3.93636	0.0107283	down	yes
ENST00000431138	ENSG00000006634	DBF4	10.3079	5.32184	4.02672	5.45447	1.6485	0.721158	0.4795	up	no
ENST00000674915	ENSG00000006652	IFRD1	0.790512	0.15571	4.18114	0.130503	0.219457	-2.18799	0.189569	down	no
ENST00000675041	ENSG00000006652	IFRD1	0.296435	0.228792	0.574325	0.477628	0.499288	-1.00206	0.445814	down	no
ENST00000265755	ENSG00000006704	GTF2IRD1	5.84771	1.77919	2.23265	1.62103	1.97912	0.98486	0.401919	up	no
ENST00000340825	ENSG00000006740	ARHGAP44	1.68098	1.87938	0	0	inf	inf	5.78812e-07	up	yes
ENST00000379672	ENSG00000006740	ARHGAP44	0.028101	0	1.33478	1.57288	0.00966447	-6.69309	0.000533573	down	yes
ENST00000426905	ENSG00000006744	ELAC2	0	11.5836	1.05296	0	11.001	3.45957	0.214675	up	no
ENST00000465825	ENSG00000006744	ELAC2	0.498712	0.813192	0.281078	0.367103	2.02398	1.01719	0.440495	up	no
ENST00000480891	ENSG00000006744	ELAC2	0.259973	0.340266	0.227692	1.22943	0.411933	-1.27952	0.340204	down	no
ENST00000265334	ENSG00000006837	CDKL3	0.360688	0.691322	0.082999	0.384636	2.24964	1.16969	0.440594	up	no
ENST00000300843	ENSG00000007047	MARK4	0.007179	0	1.2725	0.587368	0.00385996	-8.0172	6.77523e-05	down	yes
ENST00000596123	ENSG00000007080	CCDC124	2.84241	3.21564	2.15445	0.9654	1.94178	0.957378	0.472547	up	no
ENST00000674717	ENSG00000007168	PAFAH1B1	0.25205	0.084551	0.327844	0.286536	0.547871	-0.868092	0.501833	down	no
ENST00000360743	ENSG00000007341	ST7L	0.65411	0.328689	0	0.257684	3.81397	1.93129	0.2923	up	no
ENST00000629543	ENSG00000007392	LUC7L	0.631446	1.17233	0.645486	3.16734	0.473082	-1.07984	0.422522	down	no
ENST00000443147	ENSG00000007541	PIGQ	0	0.398561	0.884612	0.507132	0.286375	-1.80402	0.328293	down	no
ENST00000460465	ENSG00000008128	CDK11A	2.87537	0.032557	0.018377	0.720764	3.9342	1.97607	0.312733	up	no
ENST00000492390	ENSG00000008128	CDK11A	0.852115	1.79	0.494315	0.693425	2.22449	1.15347	0.414111	up	no
ENST00000398209	ENSG00000008277	ADAM22	0	0	0.432806	0.117406	-inf	-inf	1.63766e-05	down	yes
ENST00000357122	ENSG00000008294	SPAG9	7.744	6.87479	3.90734	1.64876	2.63112	1.39568	0.109544	up	no
ENST00000359935	ENSG00000008382	MPND	1.4097	1.33584	0.824931	0.523631	2.0359	1.02567	0.429769	up	no
ENST00000396210	ENSG00000008394	MGST1	89.7417	57.375	71.3986	144.068	0.682782	-0.550503	0.360689	down	no
ENST00000587260	ENSG00000008441	NFIX	0.591184	0.93642	0.107159	0.106831	7.13867	2.83566	0.0645186	up	no
ENST00000325568	ENSG00000008517	IL32	0.879483	0.532865	4.392	1.28389	0.248833	-2.00675	0.139495	down	no
ENST00000528163	ENSG00000008517	IL32	4.97962	2.8278	5.29622	13.6782	0.41147	-1.28114	0.29679	down	no
ENST00000528652	ENSG00000008517	IL32	0.934339	0.859508	1.63464	1.89316	0.508489	-0.97571	0.467337	down	no
ENST00000548652	ENSG00000008517	IL32	1.51143	4.26619	1.28165	1.59431	2.00893	1.00643	0.460076	up	no
ENST00000549213	ENSG00000008517	IL32	6.60904	3.87616	1.28563	0.798402	5.03122	2.33091	0.0895639	up	no
ENST00000552356	ENSG00000008517	IL32	0	1.65422	0	7.48801	0.220915	-2.17843	0.378181	down	no
ENST00000675975	ENSG00000008517	IL32	12.1988	42.6787	24.0531	5.21137	1.87523	0.907066	0.42124	up	no
ENST00000423118	ENSG00000008710	PKD1	0.050362	2.01266	0	0.11386	18.1189	4.17943	0.0570516	up	no
ENST00000486339	ENSG00000008710	PKD1	0.248683	0.331443	0.117342	0.057601	3.31609	1.72948	0.233518	up	no
ENST00000394128	ENSG00000008838	MED24	0	0	0.587005	10.5797	-inf	-inf	1.53189e-07	down	yes
ENST00000009589	ENSG00000008988	RPS20	593.646	349.1	656.052	549.798	0.78181	-0.35511	0.503125	down	no
ENST00000518875	ENSG00000008988	RPS20	5.54621	2.14907	0.970292	1.0268	3.85325	1.94607	0.150797	up	no
ENST00000519807	ENSG00000008988	RPS20	99.2887	162.106	94.9534	95.0005	1.3761	0.46058	0.446381	up	no
ENST00000339438	ENSG00000009307	CSDE1	18.0385	98.8769	39.0506	29.8959	1.69574	0.761916	0.319697	up	no
ENST00000358528	ENSG00000009307	CSDE1	34.2942	21.3095	2.8574	1.04323	14.255	3.8334	8.03256e-07	up	yes
ENST00000530886	ENSG00000009307	CSDE1	0	0.996726	6.88987	0.398713	0.136752	-2.87037	0.159869	down	no
ENST00000534699	ENSG00000009307	CSDE1	1.22521	6.73878	1.58291	0.758757	3.40099	1.76596	0.194672	up	no
ENST00000610726	ENSG00000009307	CSDE1	1.63387	0.55242	36.7106	24.3978	0.0357772	-4.80482	1.85074e-09	down	yes
ENST00000470408	ENSG00000009335	UBE3C	0.130145	0.319816	0.378411	0.574307	0.472292	-1.08225	0.392306	down	no
ENST00000554767	ENSG00000009830	POMT2	0	0.076994	0.281496	0.624597	0.0849736	-3.55684	0.0487468	down	yes
ENST00000620996	ENSG00000009844	VTA1	0.418659	1.45455	0.413138	0.089347	3.72789	1.89836	0.194597	up	no
ENST00000540757	ENSG00000010219	DYRK4	0.475328	0.479455	1.0809	1.12832	0.432181	-1.21029	0.338109	down	no
ENST00000541024	ENSG00000010219	DYRK4	4.84214	5.22424	3.74174	0.911344	2.16338	1.11329	0.427017	up	no
ENST00000543431	ENSG00000010219	DYRK4	1.13315	0.805607	0	0	inf	inf	3.63819e-05	up	yes
ENST00000544050	ENSG00000010219	DYRK4	1.75199	1.69838	0.33275	1.20395	2.24531	1.16691	0.445422	up	no
ENST00000434197	ENSG00000010270	STARD3NL	6.03144	4.14903	7.61479	11.7465	0.525815	-0.927374	0.385607	down	no
ENST00000382519	ENSG00000010278	CD9	4.46092	0.302679	3.617	6.83132	0.45592	-1.13315	0.435799	down	no
ENST00000420808	ENSG00000010322	NISCH	1.36137	1.73976	1.73208	3.87667	0.55291	-0.854883	0.476655	down	no
ENST00000460759	ENSG00000010322	NISCH	1.6201	2.17674	0.819332	1.06231	2.01784	1.01281	0.476386	up	no
ENST00000342836	ENSG00000010438	PRSS3	0	0.264227	3.59336	4.17243	0.0340245	-4.87728	0.00865904	down	yes
ENST00000361005	ENSG00000010438	PRSS3	11.8474	8.63285	5.55348	6.10038	1.75738	0.813428	0.497241	up	no
ENST00000372595	ENSG00000010803	SCMH1	0.095968	0.126312	0.75709	0.623346	0.161022	-2.63467	0.0441191	down	yes
ENST00000372596	ENSG00000010803	SCMH1	3.55721	1.59969	0.162245	1.21345	3.74858	1.90635	0.180009	up	no
ENST00000372597	ENSG00000010803	SCMH1	3.7937	1.39283	0.109861	2.26392	2.18492	1.12758	0.451812	up	no
ENST00000397174	ENSG00000010803	SCMH1	0.769917	1.30086	2.1978	2.03324	0.489424	-1.03084	0.398359	down	no
ENST00000367603	ENSG00000010818	HIVEP2	2.64321	0	0	0.543943	4.85935	2.28076	0.39942	up	no
ENST00000609199	ENSG00000011007	ELOA	1.53039	0.707216	0.349254	0.180926	4.22046	2.0774	0.127191	up	no
ENST00000393193	ENSG00000011052	NME1-NME2	28.8234	103.121	96.8587	100.777	0.667612	-0.582918	0.363509	down	no
ENST00000555572	ENSG00000011052	NME1-NME2	21.1996	56.7328	65.6669	58.2231	0.629045	-0.668764	0.295597	down	no
ENST00000537971	ENSG00000011105	TSPAN9	0.816866	0	1.6238	1.71598	0.244587	-2.03158	0.283459	down	no
ENST00000675753	ENSG00000011143	MKS1	2.15643	2.75702	0.713618	0.521623	3.97773	1.99194	0.134914	up	no
ENST00000458276	ENSG00000011198	ABHD5	1.29715	1.00861	3.93482	1.18947	0.449966	-1.15211	0.377153	down	no
ENST00000595087	ENSG00000011243	AKAP8L	1.60685	1.08473	0.464145	0.771417	2.17842	1.12328	0.432635	up	no
ENST00000415868	ENSG00000011258	MBTD1	0.675633	0.207286	0.377395	1.27766	0.533467	-0.90653	0.503053	down	no
ENST00000481107	ENSG00000011295	TTC19	0.460702	0.705057	0.21408	0.360536	2.02876	1.0206	0.439455	up	no
ENST00000350092	ENSG00000011304	PTBP1	2.29681	12.0901	0.3731	0.55424	15.5141	3.95551	0.00199943	up	yes
ENST00000635647	ENSG00000011304	PTBP1	0.061421	1.93271	6.48795	4.32357	0.184445	-2.43874	0.075776	down	no
ENST00000396068	ENSG00000011426	ANLN	10.6414	14.2553	8.91341	8.70509	1.4131	0.498864	0.467784	up	no
ENST00000545156	ENSG00000011451	WIZ	5.84256	2.48041	1.45197	0.705002	3.85864	1.94809	0.08413	up	no
ENST00000674001	ENSG00000011451	WIZ	0	2.35222	2.9922	3.32246	0.372502	-1.42468	0.416591	down	no
ENST00000674089	ENSG00000011451	WIZ	0	2.51218	3.27952	2.45053	0.438422	-1.18961	0.499774	down	no
ENST00000391919	ENSG00000011485	PPP5C	1.79441	1.90082	0.494027	0.952226	2.55503	1.35334	0.309236	up	no
ENST00000354071	ENSG00000012048	BRCA1	0.890568	1.81046	0.82862	0.53326	1.98331	0.98791	0.457157	up	no
ENST00000468300	ENSG00000012048	BRCA1	1.89596	3.99417	0	0	inf	inf	2.62997e-07	up	yes
ENST00000300853	ENSG00000012061	ERCC1	2.16018	7.06785	1.61955	2.14026	2.45438	1.29536	0.257543	up	no
ENST00000340192	ENSG00000012061	ERCC1	4.88998	2.68361	5.45141	8.24905	0.552799	-0.855174	0.481384	down	no
ENST00000554990	ENSG00000012983	MAP4K5	3.74918	4.54433	2.6645	0.325012	2.7742	1.47207	0.215453	up	no
ENST00000593455	ENSG00000013275	PSMC4	14.5236	16.8072	9.44311	4.19285	2.29766	1.20017	0.219453	up	no
ENST00000601697	ENSG00000013275	PSMC4	12.3553	2.36567	3.22615	26.4391	0.496237	-1.0109	0.379106	down	no
ENST00000225308	ENSG00000013306	SLC25A39	5.04208	10.4769	67.8812	47.4436	0.134568	-2.8936	4.88558e-05	down	yes
ENST00000377095	ENSG00000013306	SLC25A39	65.2983	48.4582	24.6841	37.4362	1.83123	0.872813	0.169518	up	no
ENST00000537904	ENSG00000013306	SLC25A39	1.59072	1.71619	0.688208	0.363661	3.14385	1.65253	0.211921	up	no
ENST00000590194	ENSG00000013306	SLC25A39	1.10227	1.69047	0.457226	0	6.108	2.6107	0.158096	up	no
ENST00000591006	ENSG00000013306	SLC25A39	22.3707	23.386	3.19509	9.41355	3.629	1.85957	0.0210401	up	yes
ENST00000591151	ENSG00000013306	SLC25A39	1.40368	2.39426	0.687065	1.20191	2.01058	1.00761	0.480199	up	no
ENST00000395353	ENSG00000013364	MVP	0.265491	0	0.353958	0.519024	0.30412	-1.71729	0.356968	down	no
ENST00000413040	ENSG00000013374	NUB1	13.5258	19.5527	20.9648	23.3136	0.747059	-0.420707	0.463736	down	no
ENST00000470229	ENSG00000013374	NUB1	3.10738	2.72668	0	0	inf	inf	2.12679e-07	up	yes
ENST00000347642	ENSG00000013561	RNF14	0.029161	0	0.885012	1.36187	0.0129784	-6.26774	0.00101237	down	yes
ENST00000350437	ENSG00000013573	DDX11	1.76874	0	2.6693	7.75907	0.169609	-2.55972	0.165062	down	no
ENST00000537136	ENSG00000013573	DDX11	1.6334	1.89223	0.632703	0.587407	2.8896	1.53087	0.295786	up	no
ENST00000542838	ENSG00000013573	DDX11	6.96051	17.9854	9.91195	6.14972	1.55314	0.635184	0.415909	up	no
ENST00000527850	ENSG00000014138	POLA2	1.91477	0.227536	3.52013	0.986872	0.475327	-1.07301	0.451754	down	no
ENST00000279247	ENSG00000014216	CAPN1	48.6113	38.3659	12.1924	40.6838	1.64492	0.718018	0.299257	up	no
ENST00000527323	ENSG00000014216	CAPN1	0.642902	3.40893	0	1.11487	3.63434	1.86169	0.356426	up	no
ENST00000533820	ENSG00000014216	CAPN1	0	3.14001	31.7227	0	0.0989833	-3.33667	0.209102	down	no
ENST00000432309	ENSG00000014641	MDH1	2.07679	1.30727	0.211945	1.4099	2.08655	1.06112	0.455977	up	no
ENST00000539945	ENSG00000014641	MDH1	21.3177	13.4853	8.73775	11.5821	1.71276	0.77632	0.411257	up	no
ENST00000370483	ENSG00000014919	COX15	1.03597	0.653531	4.22262	1.57629	0.291347	-1.77919	0.163492	down	no
ENST00000327791	ENSG00000015153	YAF2	0.080334	0.193015	1.99388	2.19835	0.0652037	-3.9389	0.00534771	down	yes
ENST00000534854	ENSG00000015153	YAF2	3.4935	3.87255	1.88967	2.17713	1.81126	0.856995	0.421815	up	no
ENST00000558098	ENSG00000015171	ZMYND11	0.491009	0.450199	0.174847	0.074331	3.77725	1.91734	0.21264	up	no
ENST00000502422	ENSG00000015479	MATR3	0.950041	0.537114	4.24321	3.39501	0.194699	-2.36068	0.0661525	down	no
ENST00000505625	ENSG00000015479	MATR3	0.684949	0.433288	0.496232	1.81802	0.483196	-1.04932	0.399617	down	no
ENST00000422190	ENSG00000017260	ATP2C1	1.11336	1.05791	0.259701	0.104214	5.96642	2.57687	0.0642637	up	no
ENST00000504612	ENSG00000017260	ATP2C1	0.130901	0.845976	0.257723	0.087375	2.83072	1.50117	0.337519	up	no
ENST00000615300	ENSG00000017483	SLC38A5	2.55536	2.1823	0.673167	1.60198	2.08235	1.05821	0.423761	up	no
ENST00000320339	ENSG00000018610	CXorf56	0.541932	1.31858	0.150445	0	12.3667	3.62839	0.0518103	up	no
ENST00000356063	ENSG00000019144	PHLDB1	0	2.0576	2.21982	3.12275	0.385134	-1.37657	0.445574	down	no
ENST00000371515	ENSG00000020256	ZFP64	0.668624	0.874584	1.29925	2.58329	0.397474	-1.33107	0.29291	down	no
ENST00000392067	ENSG00000020577	SAMD4A	0.330072	0.842933	1.92642	0.965015	0.405683	-1.30158	0.279557	down	no
ENST00000554335	ENSG00000020577	SAMD4A	2.36768	3.65293	0.13197	2.7121	2.1169	1.08195	0.388783	up	no
ENST00000323977	ENSG00000020922	MRE11	0.731647	3.38088	1.5436	0.333012	2.19146	1.13189	0.445583	up	no
ENST00000621856	ENSG00000021574	SPAST	0.650603	0.071663	1.54778	0.658193	0.327413	-1.61081	0.264815	down	no
ENST00000263650	ENSG00000021762	OSBPL5	1.61625	0.197888	1.483	2.1012	0.506148	-0.982369	0.465898	down	no
ENST00000023939	ENSG00000022277	RTF2	0	2.20494	0	0.484882	4.54738	2.18504	0.405168	up	no
ENST00000484084	ENSG00000022277	RTF2	0.763879	0.457618	1.44681	1.57153	0.404691	-1.30511	0.341844	down	no
ENST00000354420	ENSG00000023191	RNH1	1.65903	0.91752	5.52455	1.45627	0.36909	-1.43795	0.272561	down	no
ENST00000397604	ENSG00000023191	RNH1	0.760125	0.83805	0.800705	3.3905	0.381317	-1.39094	0.30451	down	no
ENST00000533410	ENSG00000023191	RNH1	6.92849	3.92371	2.47651	1.74467	2.5709	1.36227	0.269153	up	no
ENST00000025008	ENSG00000023287	RB1CC1	6.00498	7.56903	2.08894	3.97631	2.23799	1.16221	0.125842	up	no
ENST00000435644	ENSG00000023287	RB1CC1	7.40506	6.89736	10.006	10.1079	0.71107	-0.491937	0.39892	down	no
ENST00000310271	ENSG00000023330	ALAS1	11.3106	9.69482	4.3913	5.9363	2.03391	1.02426	0.276662	up	no
ENST00000484952	ENSG00000023330	ALAS1	4.18837	7.22296	17.234	8.73244	0.439464	-1.18618	0.157228	down	no
ENST00000468102	ENSG00000023892	DEF6	1.02808	1.292	2.09027	2.51625	0.503651	-0.989504	0.467526	down	no
ENST00000372899	ENSG00000024048	UBR2	3.32197	2.75496	1.0687	0.750065	3.34124	1.74039	0.0790772	up	no
ENST00000372901	ENSG00000024048	UBR2	3.64299	4.98091	6.62509	6.60705	0.651739	-0.617634	0.325216	down	no
ENST00000370966	ENSG00000024526	DEPDC1	1.23255	1.14734	0.285924	0.498924	3.0323	1.60041	0.225374	up	no
ENST00000554643	ENSG00000025423	HSD17B6	0.011342	1.77801	0.59933	0	2.98558	1.57801	0.500723	up	no
ENST00000395397	ENSG00000025434	NR1H3	1.70408	1.75302	1.23836	0.538626	1.94548	0.960124	0.478259	up	no
ENST00000481889	ENSG00000025434	NR1H3	1.11345	0.685169	0.666962	0.114117	2.30274	1.20335	0.422293	up	no
ENST00000480273	ENSG00000026036	RTEL1-TNFRSF6B	0.42939	0.479412	0.196538	0.222322	2.1697	1.1175	0.391519	up	no
ENST00000352159	ENSG00000026103	FAS	3.25721	0.515254	0.516003	0.60892	3.35353	1.74568	0.226143	up	no
ENST00000612663	ENSG00000026103	FAS	0.069896	2.64292	0.8213	0.018415	3.23064	1.69182	0.375991	up	no
ENST00000652046	ENSG00000026103	FAS	3.50513	3.64168	6.40745	6.19636	0.567035	-0.81849	0.33959	down	no
ENST00000082468	ENSG00000026950	BTN3A1	1.12208	0.806949	0	0.689088	2.79939	1.48511	0.437256	up	no
ENST00000505145	ENSG00000027847	B4GALT7	0.469268	0.486977	0.884361	0.792193	0.570363	-0.810047	0.504933	down	no
ENST00000340157	ENSG00000028116	VRK2	9.36877	10.8566	6.24616	3.64654	2.04447	1.03173	0.320573	up	no
ENST00000432057	ENSG00000028116	VRK2	2.0366	1.55447	2.93688	5.50073	0.425602	-1.23242	0.310973	down	no
ENST00000311001	ENSG00000029153	ARNTL2	1.82322	1.21138	0	1.16025	2.61548	1.38708	0.464348	up	no
ENST00000392348	ENSG00000029363	BCLAF1	4.83833	5.4869	1.87887	3.96761	1.76606	0.820532	0.464649	up	no
ENST00000527536	ENSG00000029363	BCLAF1	4.16133	4.26094	5.33976	12.2568	0.478631	-1.06301	0.137126	down	no
ENST00000527613	ENSG00000029363	BCLAF1	1.26513	3.81125	5.78227	5.97354	0.431819	-1.2115	0.151522	down	no
ENST00000534269	ENSG00000029363	BCLAF1	1.28594	0.47884	0.622436	0.158845	2.25883	1.17558	0.412385	up	no
ENST00000640069	ENSG00000029363	BCLAF1	2.27796	16.5122	0.026497	6.81134	2.74796	1.45836	0.325848	up	no
ENST00000031146	ENSG00000029364	SLC39A9	0	0	2.67867	5.1734	-inf	-inf	3.54973e-10	down	yes
ENST00000336643	ENSG00000029364	SLC39A9	7.1739	11.0441	8.08378	3.50799	1.57163	0.652263	0.39345	up	no
ENST00000455596	ENSG00000029993	HMGB3	0	8.10715	2.1323	0	3.80206	1.92678	0.466742	up	no
ENST00000528071	ENSG00000030066	NUP160	0.409737	0.712619	0.293978	0.196829	2.28676	1.1933	0.36655	up	no
ENST00000586443	ENSG00000030582	GRN	0.947255	0.621607	5.53604	1.37986	0.226849	-2.1402	0.118548	down	no
ENST00000369923	ENSG00000031698	SARS1	33.1202	34.035	17.9395	15.0716	2.03432	1.02455	0.124893	up	no
ENST00000034275	ENSG00000031823	RANBP3	7.02378	1.26193	1.31112	1.49384	2.95394	1.56264	0.255791	up	no
ENST00000439268	ENSG00000031823	RANBP3	1.15495	4.0689	10.0646	8.10862	0.287447	-1.79863	0.0607666	down	no
ENST00000586344	ENSG00000031823	RANBP3	5.16836	1.77501	1.17625	0.46328	4.23498	2.08236	0.124745	up	no
ENST00000591092	ENSG00000031823	RANBP3	2.86372	8.14127	0.623624	0.66623	8.53196	3.09288	0.0238662	up	yes
ENST00000398659	ENSG00000032389	EIPR1	0.241099	0.564816	0.94186	0.562447	0.535738	-0.900399	0.501	down	no
ENST00000450331	ENSG00000032444	PNPLA6	5.48309	0.087564	0	0.365866	15.226	3.92846	0.079148	up	no
ENST00000351808	ENSG00000032742	IFT88	0.331948	1.32003	0	0.258558	6.38918	2.67563	0.158367	up	no
ENST00000264649	ENSG00000033627	ATP6V0A1	10.0343	12.4955	8.36871	7.16312	1.45056	0.536607	0.454566	up	no
ENST00000393829	ENSG00000033627	ATP6V0A1	9.46303	8.73305	11.7361	12.9843	0.736074	-0.442078	0.504071	down	no
ENST00000537728	ENSG00000033627	ATP6V0A1	1.75787	0	2.85178	3.46266	0.278388	-1.84483	0.328904	down	no
ENST00000585828	ENSG00000033627	ATP6V0A1	0.267551	0.269159	0.728624	0.476611	0.445316	-1.1671	0.381198	down	no
ENST00000592831	ENSG00000033627	ATP6V0A1	1.94854	1.68246	2.88356	3.7683	0.545862	-0.873393	0.378296	down	no
ENST00000455077	ENSG00000033867	SLC4A7	4.66234	4.56892	6.50685	7.7806	0.646109	-0.63015	0.419587	down	no
ENST00000519342	ENSG00000034677	RNF19A	0.538095	1.04017	1.87401	2.57461	0.354775	-1.49502	0.275065	down	no
ENST00000519449	ENSG00000034677	RNF19A	0.759575	0.902635	0	0.080709	20.5951	4.36423	0.0177021	up	yes
ENST00000211998	ENSG00000035403	VCL	0.228274	0.15715	0.145162	2.40805	0.150956	-2.7278	0.07924	down	no
ENST00000427130	ENSG00000035681	NSMAF	2.30207	1.15242	0.30641	8.95399	0.373039	-1.4226	0.301466	down	no
ENST00000262768	ENSG00000035862	TIMP2	0.175941	2.32951	2.3196	2.46245	0.52393	-0.932555	0.481125	down	no
ENST00000586057	ENSG00000035862	TIMP2	2.63169	0.400141	0.483417	0.070553	5.47291	2.45231	0.122447	up	no
ENST00000349703	ENSG00000035928	RFC1	22.4723	22.1396	21.8928	9.97134	1.40007	0.485497	0.464595	up	no
ENST00000381897	ENSG00000035928	RFC1	4.49824	5.80303	3.22871	14.3629	0.585578	-0.772066	0.331447	down	no
ENST00000344949	ENSG00000036054	TBC1D23	4.67766	8.75133	0.870395	4.23355	2.6311	1.39567	0.191004	up	no
ENST00000394144	ENSG00000036054	TBC1D23	5.66777	3.31775	9.04156	5.92612	0.600328	-0.736177	0.365005	down	no
ENST00000476275	ENSG00000036549	ZZZ3	0.247962	0.034491	0.379435	0.30097	0.415125	-1.26838	0.388929	down	no
ENST00000481346	ENSG00000036549	ZZZ3	0.358316	0.216883	0.132377	0.128052	2.20866	1.14317	0.420904	up	no
ENST00000506139	ENSG00000037474	NSUN2	6.19363	5.81459	11.9881	10.1213	0.543128	-0.880635	0.265062	down	no
ENST00000536072	ENSG00000038358	EDC4	0.691908	0.572795	0.236746	0.119895	3.54615	1.82625	0.199224	up	no
ENST00000409552	ENSG00000038532	CLEC16A	0.528547	0.680899	0.743385	2.54309	0.368007	-1.4422	0.27166	down	no
ENST00000569733	ENSG00000039523	RIPOR1	2.25345	0.679986	0.715306	0.703773	2.06714	1.04764	0.443215	up	no
ENST00000593946	ENSG00000039650	PNKP	0.57812	0.379066	0.886876	1.89662	0.343879	-1.54003	0.233858	down	no
ENST00000596014	ENSG00000039650	PNKP	3.07605	3.25558	0.438515	1.00416	4.38883	2.13384	0.116128	up	no
ENST00000600910	ENSG00000039650	PNKP	1.79234	0.537774	0.277531	0.690094	2.40807	1.26788	0.357012	up	no
ENST00000626274	ENSG00000039650	PNKP	2.00643	1.56662	0.384534	0.776577	3.07727	1.62165	0.252691	up	no
ENST00000375155	ENSG00000040487	SLC66A1	5.24594	3.43018	0.157609	3.70721	2.24489	1.16665	0.438104	up	no
ENST00000413382	ENSG00000041357	PSMA4	34.3415	46.0843	17.1988	27.4677	1.80059	0.848466	0.261312	up	no
ENST00000558639	ENSG00000041357	PSMA4	2.42148	5.08879	1.31212	2.21791	2.12754	1.08918	0.420477	up	no
ENST00000559437	ENSG00000041357	PSMA4	3.0067	6.70109	0	0	inf	inf	4.86656e-06	up	yes
ENST00000560217	ENSG00000041357	PSMA4	10.6301	2.06935	2.02341	1.28934	3.8335	1.93866	0.172175	up	no
ENST00000498510	ENSG00000041880	PARP3	0.873321	1.66492	0.177873	0.462992	3.96065	1.98574	0.17985	up	no
ENST00000545686	ENSG00000042088	TDP1	0.232494	0.111732	0.391907	0.545127	0.367357	-1.44475	0.29636	down	no
ENST00000613322	ENSG00000042286	AIFM2	1.79492	3.01285	1.75879	0.753383	1.91379	0.936431	0.472518	up	no
ENST00000356583	ENSG00000042317	SPATA7	0.679365	2.51963	0.372763	1.19287	2.04326	1.03087	0.474167	up	no
ENST00000393545	ENSG00000042317	SPATA7	0.794382	0	1.71831	0.94473	0.298299	-1.74517	0.343886	down	no
ENST00000525026	ENSG00000042429	MED17	0.460744	1.08113	0.137022	0.111438	6.20573	2.6336	0.0674846	up	no
ENST00000429806	ENSG00000042445	RETSAT	0.409858	1.19869	3.73584	1.76142	0.292608	-1.77296	0.178715	down	no
ENST00000673753	ENSG00000044090	CUL7	0.95048	1.78649	0.32059	0.417393	3.70872	1.89092	0.148014	up	no
ENST00000358220	ENSG00000047056	WDR37	0.061564	3.52886	0.078191	0.326696	8.86771	3.14856	0.0776224	up	no
ENST00000512600	ENSG00000047188	YTHDC2	0.200544	0.215189	0.548923	0.277511	0.503044	-0.991242	0.43066	down	no
ENST00000380241	ENSG00000047230	CTPS2	0.212003	0.179503	0.536365	1.58442	0.184604	-2.43749	0.0768355	down	no
ENST00000441246	ENSG00000047315	POLR2B	1.83972	0.705546	0	0	inf	inf	3.58225e-06	up	yes
ENST00000478188	ENSG00000047315	POLR2B	3.55136	2.55221	1.05632	0.851821	3.19871	1.67749	0.17915	up	no
ENST00000534964	ENSG00000047346	FAM214A	0.911159	1.20975	0.656012	0.328988	2.1532	1.10648	0.408659	up	no
ENST00000355917	ENSG00000047579	DTNBP1	1.74081	2.95008	1.92448	0.400913	2.01725	1.01239	0.481492	up	no
ENST00000360240	ENSG00000047849	MAP4	18.1076	7.74177	6.71605	8.48341	1.70068	0.76611	0.27766	up	no
ENST00000545540	ENSG00000048028	USP28	1.16753	3.68986	0	0	inf	inf	7.94896e-07	up	yes
ENST00000441542	ENSG00000048052	HDAC9	0.490023	0.282423	0.285951	0	2.70132	1.43367	0.454255	up	no
ENST00000264160	ENSG00000048991	R3HDM1	1.99598	4.97969	1.85802	1.80078	1.90655	0.930962	0.393496	up	no
ENST00000621097	ENSG00000049541	RFC2	1.76798	4.90587	2.96194	0.154985	2.14117	1.0984	0.488693	up	no
ENST00000350026	ENSG00000049618	ARID1B	0.332	3.89649	0.598304	0.540797	3.71213	1.89225	0.149903	up	no
ENST00000636930	ENSG00000049618	ARID1B	4.66502	2.55012	5.17012	5.55379	0.672809	-0.57173	0.371099	down	no
ENST00000513079	ENSG00000049860	HEXB	1.14156	0.903349	0.474846	0.461805	2.18321	1.12645	0.390243	up	no
ENST00000341247	ENSG00000050405	LIMA1	3.14825	4.01	9.75391	9.16754	0.378314	-1.40234	0.0743372	down	no
ENST00000394943	ENSG00000050405	LIMA1	6.2376	4.09911	0.214689	1.30588	6.79793	2.76509	0.0269699	up	yes
ENST00000547825	ENSG00000050405	LIMA1	0.303022	0.325302	0.124034	0.163503	2.18519	1.12776	0.413144	up	no
ENST00000552823	ENSG00000050405	LIMA1	0.277775	0.356666	0.150486	0.136204	2.21299	1.14599	0.433771	up	no
ENST00000380135	ENSG00000050426	LETMD1	0.094726	0.155131	0.688585	1.85402	0.0982682	-3.34713	0.0251916	down	yes
ENST00000547008	ENSG00000050426	LETMD1	1.55035	0.997726	0.513617	0.308802	3.09827	1.63146	0.218005	up	no
ENST00000547318	ENSG00000050426	LETMD1	6.03447	1.97263	8.63196	6.66105	0.523579	-0.933521	0.375668	down	no
ENST00000393362	ENSG00000050748	MAPK9	1.54461	2.83943	1.30844	0.508864	2.41238	1.27046	0.355838	up	no
ENST00000425491	ENSG00000050748	MAPK9	1.46255	2.40006	0.968221	0.986137	1.97641	0.982882	0.459101	up	no
ENST00000455781	ENSG00000050748	MAPK9	0	0	0.395979	0.335797	-inf	-inf	7.74215e-05	down	yes
ENST00000520212	ENSG00000050748	MAPK9	0.401643	1.79591	0.397144	0.44303	2.61559	1.38714	0.324703	up	no
ENST00000162330	ENSG00000050820	BCAR1	1.31255	0.207866	8.25833	0	0.184107	-2.44139	0.244056	down	no
ENST00000538440	ENSG00000050820	BCAR1	11.6202	13.8697	3.55869	11.2034	1.72671	0.788026	0.331965	up	no
ENST00000379792	ENSG00000051108	HERPUD1	0.267839	0.254229	1.24191	0.447593	0.309007	-1.69429	0.227233	down	no
ENST00000439977	ENSG00000051108	HERPUD1	1.67701	1.29524	11.6948	3.26123	0.198732	-2.3311	0.0337745	down	yes
ENST00000564678	ENSG00000051108	HERPUD1	1.24435	1.81369	2.44706	5.49185	0.385196	-1.37633	0.259701	down	no
ENST00000542541	ENSG00000051128	HOMER3	1.66064	1.01241	0	1.00994	2.64675	1.40422	0.450994	up	no
ENST00000423169	ENSG00000051180	RAD51	0.453102	2.57252	0.836319	0.366732	2.51496	1.33053	0.360795	up	no
ENST00000289153	ENSG00000051382	PIK3CB	0.13973	1.21913	0.191364	0.475845	2.03663	1.02618	0.495284	up	no
ENST00000513482	ENSG00000051596	THOC3	0.46875	0.544674	0.921975	4.99137	0.171379	-2.54474	0.0750736	down	no
ENST00000526774	ENSG00000052841	TTC17	2.38893	1.35567	0.734836	0.394919	3.31452	1.7288	0.194999	up	no
ENST00000463215	ENSG00000054148	PHPT1	0.740751	0.995111	2.31893	1.69559	0.432396	-1.20957	0.365184	down	no
ENST00000620295	ENSG00000054523	KIF1B	0.34621	0.888905	1.61931	0.703412	0.531753	-0.911172	0.434459	down	no
ENST00000557971	ENSG00000054690	PLEKHH1	0.531934	0.265563	0.982492	0.694468	0.475561	-1.0723	0.396736	down	no
ENST00000559981	ENSG00000054690	PLEKHH1	0.320296	0.379511	0.047142	0.134965	3.84283	1.94217	0.187235	up	no
ENST00000401088	ENSG00000055070	SZRD1	3.83603	6.25592	10.0843	11.9881	0.457219	-1.12904	0.131684	down	no
ENST00000401089	ENSG00000055070	SZRD1	6.73313	7.32544	17.9355	16.7112	0.405769	-1.30127	0.0460758	down	yes
ENST00000492354	ENSG00000055070	SZRD1	31.5821	26.8472	14.9931	14.6378	1.9719	0.979588	0.11059	up	no
ENST00000602748	ENSG00000055130	CUL1	13.535	9.87477	4.90273	0	4.77485	2.25546	0.204519	up	no
ENST00000655324	ENSG00000055130	CUL1	4.17868	2.89241	0	0	inf	inf	1.39293e-07	up	yes
ENST00000656001	ENSG00000055130	CUL1	0	0.791041	0	10.3936	0.0761086	-3.7158	0.175188	down	no
ENST00000662132	ENSG00000055130	CUL1	10.3305	2.68577	3.66978	2.87444	1.98897	0.992024	0.350211	up	no
ENST00000662716	ENSG00000055130	CUL1	4.01692	1.68439	9.59387	13.0084	0.252244	-1.98711	0.0247402	down	yes
ENST00000671421	ENSG00000055130	CUL1	1.65894	0.579869	0.557019	0.579508	1.96987	0.978098	0.47355	up	no
ENST00000521420	ENSG00000055163	CYFIP2	0	0	1.63549	0.806632	-inf	-inf	6.12881e-07	down	yes
ENST00000312010	ENSG00000055483	USP36	14.3221	8.02233	6.83394	7.20737	1.59134	0.670241	0.332625	up	no
ENST00000589225	ENSG00000055483	USP36	0.333354	0	0	8.18505	0.0407272	-4.61786	0.0964887	down	no
ENST00000341115	ENSG00000055732	MCOLN3	0.621944	1.97835	0.919461	0.411772	1.9533	0.965912	0.493373	up	no
ENST00000370587	ENSG00000055732	MCOLN3	1.7687	0.867902	0.42533	0.902003	1.98639	0.990148	0.465967	up	no
ENST00000319801	ENSG00000055917	PUM2	2.84829	1.62795	1.61996	0.298433	2.33333	1.22239	0.328805	up	no
ENST00000338086	ENSG00000055917	PUM2	0.83249	3.89082	1.35418	7.90515	0.510113	-0.97111	0.345096	down	no
ENST00000403432	ENSG00000055917	PUM2	7.92215	7.62735	12.7099	11.9765	0.629881	-0.666849	0.307772	down	no
ENST00000440577	ENSG00000055917	PUM2	9.62831	8.99692	7.84974	0	2.37272	1.24654	0.487487	up	no
ENST00000299179	ENSG00000055950	MRPL43	2.0458	1.87526	0	0.524579	7.47469	2.90201	0.12027	up	no
ENST00000479928	ENSG00000057608	GDI2	0.728638	0.889188	1.74287	1.26832	0.537272	-0.896276	0.472787	down	no
ENST00000550107	ENSG00000058272	PPP1R12A	4.22834	1.02805	0.48427	1.34221	2.87788	1.52501	0.265207	up	no
ENST00000639812	ENSG00000058673	ZC3H11A	0	0	1.02346	0.402473	-inf	-inf	5.77035e-07	down	yes
ENST00000371399	ENSG00000058799	YIPF1	0.540838	1.91914	0	0	inf	inf	8.16945e-05	up	yes
ENST00000480809	ENSG00000058866	DGKG	0.300819	0.212915	0.192336	0.060611	2.03099	1.02219	0.471601	up	no
ENST00000490452	ENSG00000058866	DGKG	1.26348	0.923107	2.23768	2.33492	0.478194	-1.06433	0.420225	down	no
ENST00000473341	ENSG00000059378	PARP12	1.90359	0	2.43974	4.94303	0.257842	-1.95544	0.301926	down	no
ENST00000540449	ENSG00000059728	MXD1	0.181914	0.340257	0.188862	0	2.76483	1.46719	0.45045	up	no
ENST00000313525	ENSG00000059769	DNAJC25	1.741	3.07868	0	1.79691	2.6822	1.42342	0.467561	up	no
ENST00000463589	ENSG00000059769	DNAJC25	0.15771	0.207368	0.690858	0.378074	0.341535	-1.54989	0.256146	down	no
ENST00000486749	ENSG00000059804	SLC2A3	3.28967	2.50735	0	2.02371	2.86455	1.51831	0.424653	up	no
ENST00000228251	ENSG00000060138	YBX3	32.2	31.9162	14.08	17.2944	2.04359	1.0311	0.123451	up	no
ENST00000536823	ENSG00000060138	YBX3	3.03982	1.37817	0.927575	0.821776	2.5255	1.33657	0.305365	up	no
ENST00000535572	ENSG00000060237	WNK1	4.37274	1.83148	3.17029	5.9615	0.679409	-0.557649	0.437841	down	no
ENST00000537687	ENSG00000060237	WNK1	1.69731	3.00687	2.27736	0.304222	1.82221	0.865687	0.423519	up	no
ENST00000539539	ENSG00000060339	CCAR1	12.424	8.09611	13.7181	17.4142	0.659124	-0.601379	0.352862	down	no
ENST00000630771	ENSG00000060339	CCAR1	0.573412	0.139219	0.582752	0.778827	0.523386	-0.934054	0.484102	down	no
ENST00000674202	ENSG00000060642	PIGV	0.864371	1.14167	0	0.636554	3.15141	1.656	0.393267	up	no
ENST00000674273	ENSG00000060642	PIGV	0.538103	0.041076	1.17318	0.217681	0.416418	-1.2639	0.409342	down	no
ENST00000373779	ENSG00000060656	PTPRU	0.938073	1.7713	1.63545	3.11521	0.570315	-0.810168	0.443576	down	no
ENST00000341756	ENSG00000060762	MPC1	1.94607	13.7558	16.164	12.5343	0.547138	-0.870023	0.442135	down	no
ENST00000475708	ENSG00000060762	MPC1	1.35608	1.00413	5.24866	5.21056	0.225658	-2.14779	0.101619	down	no
ENST00000301810	ENSG00000060971	ACAA1	0.780653	0.643408	0	0	inf	inf	0.000233174	up	yes
ENST00000469559	ENSG00000060971	ACAA1	0.262807	0.202031	0.417184	0.616665	0.449619	-1.15323	0.357503	down	no
ENST00000080059	ENSG00000061273	HDAC7	0	0	2.60128	3.23957	-inf	-inf	3.51827e-08	down	yes
ENST00000354334	ENSG00000061273	HDAC7	0	0.03501	5.8824	2.19779	0.00433282	-7.85048	2.43589e-05	down	yes
ENST00000459625	ENSG00000061273	HDAC7	3.32383	2.46532	1.47546	1.79076	1.77243	0.825731	0.410862	up	no
ENST00000548938	ENSG00000061273	HDAC7	3.45603	0.683625	0	1.15867	3.57277	1.83704	0.35706	up	no
ENST00000552960	ENSG00000061273	HDAC7	1.30577	1.05277	0.091303	0.042772	17.5912	4.13678	0.0052428	up	yes
ENST00000538315	ENSG00000061794	MRPS35	1.28941	1.28804	0	0.879248	2.93143	1.5516	0.400264	up	no
ENST00000538548	ENSG00000061936	SFSWAP	1.14467	0.991292	0.36933	0.292346	3.22811	1.69069	0.198187	up	no
ENST00000541286	ENSG00000061936	SFSWAP	0.220243	0.388498	3.46849	0.192313	0.166286	-2.58826	0.0965053	down	no
ENST00000333602	ENSG00000061938	TNK2	0.0839	0.296674	0.0808	0.899804	0.388102	-1.36549	0.34777	down	no
ENST00000672024	ENSG00000061938	TNK2	1.15128	0.622789	0	0.173354	10.2338	3.35527	0.0756994	up	no
ENST00000672887	ENSG00000061938	TNK2	0.001371	1.48904	0.346459	0	4.30185	2.10496	0.386366	up	no
ENST00000546891	ENSG00000062485	CS	1.05165	0	12.531	5.68016	0.0577476	-4.11409	0.0329025	down	yes
ENST00000352077	ENSG00000062598	ELMO2	0	0	2.0168	0.401585	-inf	-inf	2.04361e-05	down	yes
ENST00000440232	ENSG00000062822	POLD1	7.94685	5.29332	1.23993	1.50023	4.83189	2.27259	0.0286228	up	yes
ENST00000595904	ENSG00000062822	POLD1	3.74764	0.763199	5.00742	5.39363	0.433691	-1.20526	0.263737	down	no
ENST00000420463	ENSG00000063046	EIF4B	31.309	28.5563	90.5228	56.8092	0.406329	-1.29928	0.0255673	down	yes
ENST00000550704	ENSG00000063046	EIF4B	3.6472	4.58419	6.4017	7.73973	0.582076	-0.780721	0.474559	down	no
ENST00000335875	ENSG00000063127	SLC6A16	0.734107	0.559786	0	0	inf	inf	4.36531e-05	up	yes
ENST00000454748	ENSG00000063127	SLC6A16	0.013842	0.275918	0.645029	0.721105	0.212102	-2.23717	0.141511	down	no
ENST00000396720	ENSG00000063169	BICRA	1.02517	0.497682	0	0	inf	inf	3.51204e-06	up	yes
ENST00000614245	ENSG00000063169	BICRA	0	0.378047	0.789662	1.0228	0.208582	-2.26131	0.226851	down	no
ENST00000340932	ENSG00000063176	SPHK2	0	0.286386	0.632652	0.864909	0.191235	-2.38658	0.196787	down	no
ENST00000549370	ENSG00000063177	RPL18	0	0	28.7051	25.7404	-inf	-inf	1.79905e-09	down	yes
ENST00000549920	ENSG00000063177	RPL18	145.969	273.915	129.81	139.455	1.55937	0.640965	0.305064	up	no
ENST00000550973	ENSG00000063177	RPL18	42.6262	61.0578	25.4699	192.065	0.476631	-1.06906	0.176531	down	no
ENST00000315588	ENSG00000063322	MED29	8.05963	10.5979	2.23674	8.74367	1.69917	0.764829	0.394382	up	no
ENST00000615911	ENSG00000063322	MED29	4.95166	1.48039	10.0761	3.23802	0.483099	-1.04961	0.295812	down	no
ENST00000647705	ENSG00000063587	ZNF275	0.514218	0.392465	1.12866	0.678426	0.501738	-0.994993	0.422639	down	no
ENST00000542156	ENSG00000063601	MTMR1	0.786072	1.9302	0.759301	0.019867	3.48611	1.80162	0.293038	up	no
ENST00000432109	ENSG00000064012	CASP8	0	2.18601	7.41911	0.495482	0.2762	-1.85621	0.359182	down	no
ENST00000381753	ENSG00000064042	LIMCH1	0	0	0.387543	0.555201	-inf	-inf	6.29401e-06	down	yes
ENST00000503057	ENSG00000064042	LIMCH1	1.68682	0.882357	0.052673	0	48.7759	5.6081	0.00353548	up	yes
ENST00000508501	ENSG00000064042	LIMCH1	0	0	3.41029	3.14208	-inf	-inf	2.76012e-09	down	yes
ENST00000538155	ENSG00000064102	INTS13	1.40634	0.740328	3.02827	1.32781	0.492799	-1.02093	0.426809	down	no
ENST00000265388	ENSG00000064419	TNPO3	1.78509	6.19557	2.03977	1.16813	2.48781	1.31488	0.253762	up	no
ENST00000482320	ENSG00000064419	TNPO3	2.56026	1.84552	4.86557	3.9939	0.497296	-1.00782	0.312959	down	no
ENST00000587406	ENSG00000064545	TMEM161A	4.8316	2.50047	1.21126	0.522763	4.22835	2.0801	0.125649	up	no
ENST00000587583	ENSG00000064545	TMEM161A	0	0	1.21758	1.25778	-inf	-inf	3.20347e-05	down	yes
ENST00000191018	ENSG00000064601	CTSA	1.56703	0.465426	3.28717	2.65619	0.341971	-1.54806	0.241923	down	no
ENST00000372459	ENSG00000064601	CTSA	2.00937	1.43724	11.5421	10.1118	0.159168	-2.65138	0.0123918	down	yes
ENST00000600239	ENSG00000064607	SUGP2	0.01851	0.135535	0.316406	0.171914	0.315459	-1.66448	0.255546	down	no
ENST00000343225	ENSG00000064651	SLC12A2	0.167644	0.255173	0	0.088967	4.75251	2.24869	0.235241	up	no
ENST00000263097	ENSG00000064666	CNN2	41.4508	45.1958	55.5155	55.7367	0.778831	-0.360617	0.486838	down	no
ENST00000348419	ENSG00000064666	CNN2	1.11055	0.75764	1.72061	2.2951	0.465219	-1.10402	0.382942	down	no
ENST00000562958	ENSG00000064666	CNN2	0.322119	2.75145	0.419776	0.312411	4.1978	2.06963	0.169742	up	no
ENST00000565096	ENSG00000064666	CNN2	13.6294	0	0	2.13498	6.38385	2.67443	0.325923	up	no
ENST00000568865	ENSG00000064666	CNN2	0.252034	0.269426	1.9568	1.42742	0.154086	-2.6982	0.0425157	down	yes
ENST00000673773	ENSG00000064687	ABCA7	0.318876	0.349447	0.137077	0.184067	2.08107	1.05733	0.453179	up	no
ENST00000379403	ENSG00000064726	BTBD1	0.619839	0.992005	0	0	inf	inf	0.000195311	up	yes
ENST00000438103	ENSG00000064932	SBNO2	0	0	1.04866	0.843957	-inf	-inf	2.65908e-06	down	yes
ENST00000342075	ENSG00000064933	PMS1	0.261556	1.00435	0	0.261193	4.84662	2.27698	0.244007	up	no
ENST00000409823	ENSG00000064933	PMS1	0	0.489578	0.433053	1.37575	0.270664	-1.88542	0.301931	down	no
ENST00000624204	ENSG00000064933	PMS1	0.235931	0.81638	0	0.316487	3.32497	1.73334	0.370895	up	no
ENST00000488973	ENSG00000064961	HMG20B	12.0822	12.1286	6.06631	10.1112	1.49657	0.581662	0.488597	up	no
ENST00000373953	ENSG00000065029	ZNF76	3.37861	3.36964	5.97605	5.4905	0.588516	-0.764847	0.434173	down	no
ENST00000469195	ENSG00000065029	ZNF76	3.97876	2.94712	1.23886	0.567726	3.83368	1.93873	0.154455	up	no
ENST00000539214	ENSG00000065154	OAT	1.60228	1.93831	1.34249	11.3821	0.278248	-1.84556	0.163019	down	no
ENST00000549079	ENSG00000065357	DGKA	1.4683	1.00329	6.57759	3.05705	0.256532	-1.96279	0.11673	down	no
ENST00000551296	ENSG00000065357	DGKA	0	0	0.273009	0.371453	-inf	-inf	0.000139352	down	yes
ENST00000552478	ENSG00000065357	DGKA	0.906534	0.646442	0.20309	0.538402	2.09439	1.06653	0.430097	up	no
ENST00000553131	ENSG00000065361	ERBB3	0.178526	0.096478	0.756056	0.324517	0.254498	-1.97427	0.15635	down	no
ENST00000590536	ENSG00000065717	TLE2	0.557442	2.23649	3.29534	1.96616	0.531014	-0.913178	0.471062	down	no
ENST00000468747	ENSG00000065809	FAM107B	0.949007	4.02543	1.93031	0	2.57701	1.3657	0.503738	up	no
ENST00000394053	ENSG00000065911	MTHFD2	27.1658	29.2274	37.6492	36.1976	0.763651	-0.389016	0.448517	down	no
ENST00000470592	ENSG00000065911	MTHFD2	0.63735	0.869276	2.90589	2.36413	0.285886	-1.80649	0.162381	down	no
ENST00000467957	ENSG00000065978	YBX1	14.6837	27.3939	14.8422	9.67157	1.71649	0.779459	0.468559	up	no
ENST00000381513	ENSG00000066117	SMARCD1	16.8426	17.5413	8.7387	12.0914	1.65069	0.723067	0.290122	up	no
ENST00000551966	ENSG00000066117	SMARCD1	2.067	1.03093	0.670504	0.642969	2.35858	1.23792	0.37939	up	no
ENST00000308733	ENSG00000066136	NFYC	1.7314	2.04222	4.06861	4.15133	0.459082	-1.12318	0.333868	down	no
ENST00000447388	ENSG00000066136	NFYC	1.38414	2.767	4.42619	5.89091	0.402355	-1.31346	0.265297	down	no
ENST00000264938	ENSG00000066230	SLC9A3	0.706235	3.55498	0.932109	0.737096	2.55284	1.3521	0.290426	up	no
ENST00000373552	ENSG00000066248	NGEF	0.998134	2.16007	1.12455	0.479557	1.96883	0.977337	0.486323	up	no
ENST00000621943	ENSG00000066322	ELOVL1	23.4787	22.8828	15.9582	14.6727	1.51355	0.597939	0.4286	up	no
ENST00000359366	ENSG00000066427	ATXN3	1.3777	0.540154	0.533729	0.418868	2.01329	1.00956	0.455139	up	no
ENST00000644486	ENSG00000066427	ATXN3	0.474095	0.398516	0.583212	1.01675	0.545397	-0.874623	0.480072	down	no
ENST00000648977	ENSG00000066651	TRMT11	1.17074	0.872321	0.389163	0.427719	2.50105	1.32253	0.315562	up	no
ENST00000395067	ENSG00000066697	MSANTD3	37.8712	12.4781	15.1797	13.0761	1.78191	0.833424	0.286671	up	no
ENST00000613183	ENSG00000066697	MSANTD3	0	9.04246	10.5087	11.1775	0.416968	-1.26199	0.471133	down	no
ENST00000520381	ENSG00000066777	ARFGEF1	0.129337	0.028861	0.212639	0.215321	0.369656	-1.43574	0.317799	down	no
ENST00000262093	ENSG00000066926	FECH	1.29717	2.96612	0.778536	1.11493	2.25159	1.17094	0.283741	up	no
ENST00000585494	ENSG00000066926	FECH	2.51959	0.233544	3.84952	2.28808	0.448569	-1.1566	0.412707	down	no
ENST00000381344	ENSG00000067064	IDI1	8.63232	24.457	24.8723	23.7654	0.680323	-0.555709	0.402382	down	no
ENST00000558964	ENSG00000067141	NEO1	1.31633	4.02657	0	1.88388	2.83611	1.50391	0.441376	up	no
ENST00000560262	ENSG00000067141	NEO1	0.79093	0.654123	1.51522	1.14548	0.543112	-0.88068	0.47238	down	no
ENST00000373542	ENSG00000067177	PHKA1	6.67392	5.74146	5.97765	11.546	0.708491	-0.497179	0.434555	down	no
ENST00000541638	ENSG00000067221	STOML1	0.049556	0.166918	0.345729	0.339166	0.316069	-1.66169	0.207443	down	no
ENST00000319622	ENSG00000067225	PKM	0	1.95447	6.44492	11.9553	0.10622	-3.23487	0.0696547	down	no
ENST00000449901	ENSG00000067225	PKM	1.40468	4.59405	0.405264	0.19268	10.0323	3.32657	0.0222957	up	yes
ENST00000359208	ENSG00000067334	DNTTIP2	0.483194	0.674798	0	0.246092	4.70552	2.23436	0.23449	up	no
ENST00000460191	ENSG00000067334	DNTTIP2	0.409292	1.17075	0.523613	0.101583	2.52728	1.33758	0.358171	up	no
ENST00000382039	ENSG00000067369	TP53BP1	2.2106	0	0.514176	0	4.2993	2.1041	0.436562	up	no
ENST00000411772	ENSG00000067369	TP53BP1	0.207356	0.310223	0.14173	0.042898	2.80336	1.48716	0.322403	up	no
ENST00000572085	ENSG00000067369	TP53BP1	0.192413	1.35915	0.133528	0.131879	5.84596	2.54744	0.0884359	up	no
ENST00000422781	ENSG00000067560	RHOA	3.8648	4.0572	0.624113	2.83585	2.28962	1.19511	0.396435	up	no
ENST00000397909	ENSG00000067798	NAV3	16.5357	24.413	13.6435	15.0804	1.42559	0.511562	0.387467	up	no
ENST00000550503	ENSG00000067798	NAV3	2.61769	0.474564	6.55295	3.34079	0.312546	-1.67786	0.232228	down	no
ENST00000644176	ENSG00000067798	NAV3	10.5957	1.47205	10.9923	12.3925	0.516051	-0.954415	0.237283	down	no
ENST00000587843	ENSG00000067836	ROGDI	2.4116	0.516001	0.638706	0.332541	3.01427	1.59181	0.258705	up	no
ENST00000412916	ENSG00000067955	CBFB	10.889	16.7998	15.5431	21.7955	0.74156	-0.431364	0.477804	down	no
ENST00000652116	ENSG00000067955	CBFB	2.43378	3.65103	2.27481	0.16436	2.49462	1.31882	0.371037	up	no
ENST00000395139	ENSG00000068001	HYAL2	2.00965	1.32659	3.25666	3.14308	0.521309	-0.939791	0.432213	down	no
ENST00000590958	ENSG00000068120	COASY	1.34365	6.33085	0.567949	0.695681	6.07338	2.6025	0.0672876	up	no
ENST00000338042	ENSG00000068305	MEF2A	4.36652	4.06731	2.30148	0	3.66452	1.87363	0.307922	up	no
ENST00000354410	ENSG00000068305	MEF2A	2.82171	3.35502	4.35705	5.80326	0.607927	-0.718029	0.352134	down	no
ENST00000557785	ENSG00000068305	MEF2A	0.600914	0.30193	0.459954	1.72575	0.413069	-1.27555	0.34528	down	no
ENST00000671846	ENSG00000068366	ACSL4	0	0.65812	1.37002	0.234398	0.410192	-1.28563	0.501574	down	no
ENST00000376423	ENSG00000068400	GRIPAP1	12.4265	6.47969	13.6204	12.9601	0.71128	-0.49151	0.471175	down	no
ENST00000418678	ENSG00000068650	ATP11A	0.457827	0.515272	0.040992	0.248316	3.36354	1.74998	0.243498	up	no
ENST00000487903	ENSG00000068650	ATP11A	2.32205	0	2.13842	4.7527	0.336962	-1.56934	0.371135	down	no
ENST00000409681	ENSG00000068654	POLR1A	4.32522	0.103175	1.34213	0.23499	2.8079	1.48949	0.338819	up	no
ENST00000409245	ENSG00000068724	TTC7A	2.84812	0.260617	0.102166	0.326889	7.24554	2.85709	0.0726488	up	no
ENST00000491786	ENSG00000068724	TTC7A	0.992334	0.225882	0.277951	0.053844	3.67159	1.87641	0.207542	up	no
ENST00000479914	ENSG00000068745	IP6K2	0.359004	0.343799	0.750451	3.42441	0.168341	-2.57054	0.0688018	down	no
ENST00000491686	ENSG00000068745	IP6K2	3.94022	1.68502	0.942954	1.30512	2.50225	1.32323	0.317634	up	no
ENST00000407818	ENSG00000068796	KIF2A	0	0.289542	0.005117	0.818095	0.351722	-1.50749	0.493042	down	no
ENST00000496589	ENSG00000068885	IFT80	3.61519	0.074884	0.490351	0.610497	3.35203	1.74504	0.29011	up	no
ENST00000249396	ENSG00000068903	SIRT2	4.5679	3.30044	8.40339	9.04748	0.450885	-1.14917	0.253922	down	no
ENST00000392081	ENSG00000068903	SIRT2	8.65497	8.93057	5.67457	3.97192	1.823	0.866313	0.39463	up	no
ENST00000462654	ENSG00000068903	SIRT2	0.725682	0.812425	0.425796	0.299897	2.1195	1.08372	0.405858	up	no
ENST00000465172	ENSG00000069849	ATP1B3	1.71415	2.23722	0.814808	0.783697	2.47191	1.30563	0.325675	up	no
ENST00000565367	ENSG00000069943	PIGB	0.710841	3.50412	0	1.40425	3.00156	1.58571	0.427628	up	no
ENST00000538239	ENSG00000070018	LRP6	0.198309	0.940744	0	0	inf	inf	7.93987e-06	up	yes
ENST00000374647	ENSG00000070061	ELP1	0.874443	9.1924	11.4116	8.22129	0.512754	-0.963662	0.274261	down	no
ENST00000674948	ENSG00000070061	ELP1	0.071594	3.69414	0.392651	0.157787	6.84135	2.77428	0.0975153	up	no
ENST00000675215	ENSG00000070061	ELP1	1.2457	0.125225	0.141421	0.181222	4.24905	2.08714	0.165061	up	no
ENST00000675406	ENSG00000070061	ELP1	0	0.965346	0.487382	2.18022	0.361878	-1.46642	0.445096	down	no
ENST00000675458	ENSG00000070061	ELP1	2.76003	0.361743	0.614899	0.481805	2.84651	1.50919	0.290333	up	no
ENST00000675748	ENSG00000070061	ELP1	0	0.407958	0.746855	0.426599	0.347656	-1.52427	0.412091	down	no
ENST00000675825	ENSG00000070061	ELP1	10.3139	0.399489	0.989518	1.94475	3.65112	1.86834	0.133216	up	no
ENST00000675877	ENSG00000070061	ELP1	0.209222	0.230948	0	0.125553	3.50585	1.80976	0.343417	up	no
ENST00000676121	ENSG00000070061	ELP1	0.162268	0.397824	0.82639	0.914649	0.3217	-1.63621	0.200853	down	no
ENST00000412145	ENSG00000070159	PTPN3	0.160741	0.662059	0.617747	0.876841	0.55052	-0.861134	0.489018	down	no
ENST00000644917	ENSG00000070182	SPTB	0.269122	0.210955	0.187392	0.035137	2.15737	1.10927	0.434293	up	no
ENST00000374723	ENSG00000070214	SLC44A1	0	0.176084	1.89264	0	0.0930364	-3.42606	0.206652	down	no
ENST00000261556	ENSG00000070269	TMEM260	0.875787	1.08241	1.80547	1.79059	0.544538	-0.876895	0.453218	down	no
ENST00000539559	ENSG00000070269	TMEM260	1.61111	1.70884	0.007887	0	420.939	8.71747	2.72197e-05	up	yes
ENST00000389262	ENSG00000070413	DGCR2	0.1091	0.02322	0.417006	0.18144	0.221106	-2.17719	0.148307	down	no
ENST00000586749	ENSG00000070423	RNF126	4.04742	2.38279	1.3428	1.18204	2.54678	1.34867	0.298943	up	no
ENST00000589762	ENSG00000070423	RNF126	9.64817	3.34109	3.31517	1.57054	2.65862	1.41068	0.298495	up	no
ENST00000605891	ENSG00000070423	RNF126	0.698489	0	4.36593	2.82871	0.0970847	-3.36461	0.0752091	down	no
ENST00000542934	ENSG00000070495	JMJD6	0.006826	1.09489	3.21339	1.62821	0.227551	-2.13574	0.217033	down	no
ENST00000522610	ENSG00000070501	POLB	1.73037	5.0303	0.957067	1.54873	2.69801	1.4319	0.300114	up	no
ENST00000262139	ENSG00000070540	WIPI1	7.3667	0.198426	8.44867	8.78184	0.439054	-1.18753	0.378481	down	no
ENST00000546360	ENSG00000070540	WIPI1	1.15104	9.03653	0	0	inf	inf	3.30639e-06	up	yes
ENST00000394309	ENSG00000070669	ASNS	0.79483	4.82277	0.303467	2.1123	2.32539	1.21747	0.420724	up	no
ENST00000318607	ENSG00000070756	PABPC1	1062.6	1058.08	1083.47	421.659	1.40897	0.494645	0.450601	up	no
ENST00000518716	ENSG00000070756	PABPC1	1.13022	1.42724	6.41315	14.2172	0.123966	-3.01198	0.0275381	down	yes
ENST00000519004	ENSG00000070756	PABPC1	0	0	63.865	669.739	-inf	-inf	1.61071e-24	down	yes
ENST00000519100	ENSG00000070756	PABPC1	7.95379	5.8504	14.8831	21.6772	0.377573	-1.40517	0.183976	down	no
ENST00000519622	ENSG00000070756	PABPC1	13.5522	11.6116	0	96.9851	0.25946	-1.94642	0.302662	down	no
ENST00000522387	ENSG00000070756	PABPC1	7.95076	51.0665	11.7282	194.226	0.286555	-1.80312	0.0862294	down	no
ENST00000372086	ENSG00000070759	TESK2	1.18614	1.26539	0.623854	0.066991	3.54859	1.82725	0.220356	up	no
ENST00000328736	ENSG00000070778	PTPN21	0	0	1.51891	2.20387	-inf	-inf	7.52587e-08	down	yes
ENST00000554270	ENSG00000070778	PTPN21	1.79905	0.241503	0.135158	0.119982	7.99777	2.9996	0.0485604	up	yes
ENST00000556564	ENSG00000070778	PTPN21	0.861802	0.8863	0	0	inf	inf	1.61793e-06	up	yes
ENST00000620860	ENSG00000070785	EIF2B3	0.511988	1.81778	0.251532	0	9.26232	3.21137	0.0872746	up	no
ENST00000377797	ENSG00000070814	TCOF1	0.137366	0.27182	0.076324	0.859115	0.437427	-1.19289	0.407306	down	no
ENST00000439160	ENSG00000070814	TCOF1	20.8142	19.3786	11.0469	15.8984	1.49164	0.5769	0.357697	up	no
ENST00000445265	ENSG00000070814	TCOF1	6.42433	8.40251	12.0509	8.73589	0.713281	-0.487458	0.432966	down	no
ENST00000344548	ENSG00000070831	CDC42	28.9821	27.0886	48.7222	27.7825	0.732905	-0.448301	0.432444	down	no
ENST00000261173	ENSG00000070961	ATP2B1	0.50976	2.21852	4.15145	4.14658	0.328787	-1.60478	0.0986366	down	no
ENST00000428670	ENSG00000070961	ATP2B1	3.64903	2.80777	0.025564	0.024828	128.132	7.00148	2.76481e-07	up	yes
ENST00000347699	ENSG00000071054	MAP4K4	5.82227	3.01828	4.23194	14.1578	0.480733	-1.05669	0.221073	down	no
ENST00000350878	ENSG00000071054	MAP4K4	18.6798	4.73355	7.35756	4.47875	1.9781	0.984113	0.193904	up	no
ENST00000413150	ENSG00000071054	MAP4K4	6.0542	21.8412	19.7307	17.5867	0.747518	-0.41982	0.493311	down	no
ENST00000425019	ENSG00000071054	MAP4K4	0.518122	0.641037	0.260158	0.111317	3.12042	1.64174	0.22007	up	no
ENST00000634702	ENSG00000071054	MAP4K4	0.83876	1.92219	0	0.444314	6.21396	2.63551	0.173666	up	no
ENST00000264968	ENSG00000071073	MGAT4A	1.00257	1.18332	0.170476	0.010013	12.1109	3.59824	0.0245274	up	yes
ENST00000393487	ENSG00000071073	MGAT4A	0	0	0.877324	1.16519	-inf	-inf	3.17597e-07	down	yes
ENST00000441435	ENSG00000071082	RPL31	2.71405	7.95509	1.20944	2.87251	2.61374	1.38612	0.322617	up	no
ENST00000611725	ENSG00000071189	SNX13	1.22566	1.97589	3.51854	1.87335	0.593771	-0.752021	0.425519	down	no
ENST00000265758	ENSG00000071462	BUD23	8.98936	27.5186	27.7527	30.8563	0.622907	-0.68291	0.377576	down	no
ENST00000421744	ENSG00000071462	BUD23	2.15933	0.938789	1.11392	0.392904	2.05606	1.03988	0.471298	up	no
ENST00000432522	ENSG00000071462	BUD23	1.9458	0.835109	0.555831	0.852542	1.97456	0.981528	0.488955	up	no
ENST00000441822	ENSG00000071462	BUD23	8.09582	1.49315	1.32143	1.09137	3.97421	1.99067	0.160848	up	no
ENST00000463307	ENSG00000071462	BUD23	11.7898	2.96782	2.27835	1.40919	4.00203	2.00073	0.113173	up	no
ENST00000491569	ENSG00000071553	ATP6AP1	4.06041	0.690373	3.93108	9.78402	0.34639	-1.52953	0.216841	down	no
ENST00000262965	ENSG00000071564	TCF3	6.42965	6.53796	5.57444	0.676584	2.07448	1.05275	0.31259	up	no
ENST00000344749	ENSG00000071564	TCF3	1.15333	1.77614	0.383484	5.71039	0.480724	-1.05672	0.412986	down	no
ENST00000588136	ENSG00000071564	TCF3	3.24698	2.98036	2.13001	0.6805	2.21573	1.14778	0.328593	up	no
ENST00000593064	ENSG00000071564	TCF3	0.406454	0.379671	1.38537	1.64749	0.259203	-1.94784	0.135733	down	no
ENST00000611869	ENSG00000071564	TCF3	2.68029	2.20585	3.54617	4.62929	0.597659	-0.742605	0.436072	down	no
ENST00000589484	ENSG00000071626	DAZAP1	0.944586	0.869599	1.98886	1.99146	0.455789	-1.13356	0.349222	down	no
ENST00000592522	ENSG00000071626	DAZAP1	9.91741	13.3774	0.632874	1.75076	9.77281	3.28877	0.00318183	up	yes
ENST00000621967	ENSG00000071889	FAM3A	0.351578	0.955162	0.89411	2.88514	0.345767	-1.53213	0.260815	down	no
ENST00000553384	ENSG00000072042	RDH11	4.824	6.8804	0	3.6877	3.1739	1.66626	0.38655	up	no
ENST00000554523	ENSG00000072121	ZFYVE26	0.112486	0.194806	0.8136	0.326612	0.269504	-1.89162	0.156524	down	no
ENST00000631291	ENSG00000072210	ALDH3A2	0.243117	0.452975	1.02957	1.02373	0.339011	-1.5606	0.230597	down	no
ENST00000392396	ENSG00000072274	TFRC	0.423114	0.033714	0.352947	0.535482	0.514198	-0.959605	0.50099	down	no
ENST00000615793	ENSG00000072401	UBE2D1	1.00277	0.085308	1.31987	0.897648	0.490671	-1.02717	0.476655	down	no
ENST00000675504	ENSG00000072501	SMC1A	2.97187	0	0.260548	0.164599	6.99022	2.80534	0.184142	up	no
ENST00000360568	ENSG00000072682	P4HA2	3.3366	4.52897	4.05162	8.47672	0.627822	-0.671572	0.503032	down	no
ENST00000563319	ENSG00000072736	NFATC3	0.301352	0	0.52943	0.810825	0.224847	-2.15299	0.236965	down	no
ENST00000434583	ENSG00000072756	TRNT1	0.054975	0.334559	0.894553	0.602649	0.260175	-1.94245	0.188994	down	no
ENST00000356839	ENSG00000072778	ACADVL	8.41673	9.29516	1.13251	37.216	0.461866	-1.11445	0.317496	down	no
ENST00000579286	ENSG00000072778	ACADVL	3.36504	4.8687	2.82835	0.147058	2.76727	1.46846	0.354499	up	no
ENST00000579425	ENSG00000072778	ACADVL	2.1255	3.63252	1.14431	1.43275	2.23434	1.15985	0.388659	up	no
ENST00000396354	ENSG00000072864	NDE1	13.3053	0	28.3103	5.38068	0.394923	-1.34036	0.447372	down	no
ENST00000577101	ENSG00000072864	NDE1	0.107193	0.51676	0	10.114	0.0616921	-4.01877	0.0753987	down	no
ENST00000674588	ENSG00000072864	NDE1	0.045086	0.568597	0.216728	0	2.83158	1.50161	0.468515	up	no
ENST00000675926	ENSG00000072864	NDE1	4.00939	16.5594	1.95042	3.4088	3.83802	1.94036	0.0689908	up	no
ENST00000261693	ENSG00000073060	SCARB1	8.32181	3.12931	9.73842	8.38834	0.631724	-0.662633	0.409975	down	no
ENST00000339570	ENSG00000073060	SCARB1	2.67854	9.47464	4.05794	2.79675	1.77297	0.82617	0.435764	up	no
ENST00000167462	ENSG00000073350	LLGL2	0.537777	0.31306	2.44561	0.595338	0.279793	-1.83757	0.176732	down	no
ENST00000375227	ENSG00000073350	LLGL2	2.95607	3.48637	0.658233	1.95212	2.46803	1.30336	0.339113	up	no
ENST00000545227	ENSG00000073350	LLGL2	0.525198	0.122579	0.603733	1.27343	0.345083	-1.53499	0.264637	down	no
ENST00000310298	ENSG00000073417	PDE8A	2.32297	0	0.517857	0	4.48574	2.16534	0.418443	up	no
ENST00000264932	ENSG00000073578	SDHA	31.6954	21.2172	10.3173	16.9078	1.94353	0.958678	0.156881	up	no
ENST00000504309	ENSG00000073578	SDHA	9.14502	24.11	27.6981	27.7851	0.599371	-0.738479	0.270641	down	no
ENST00000510361	ENSG00000073578	SDHA	6.65323	2.98339	16.9602	10.1342	0.355669	-1.49139	0.0984054	down	no
ENST00000511810	ENSG00000073578	SDHA	0.299015	0.095671	0.388153	0.713569	0.358245	-1.48098	0.289697	down	no
ENST00000643893	ENSG00000073584	SMARCE1	1.3513	0.483765	0.257957	0.621978	2.08546	1.06037	0.436006	up	no
ENST00000644701	ENSG00000073584	SMARCE1	0.865856	0.207076	1.16875	1.71715	0.371785	-1.42746	0.293858	down	no
ENST00000646401	ENSG00000073584	SMARCE1	0.337372	0.230974	0.432929	0.693179	0.504699	-0.986504	0.42709	down	no
ENST00000479136	ENSG00000073605	GSDMB	0.311341	0.110286	0.522206	0.427523	0.443945	-1.17155	0.399474	down	no
ENST00000346192	ENSG00000073792	IGF2BP2	1.21993	1.05791	5.31901	1.22437	0.348114	-1.52237	0.220291	down	no
ENST00000421047	ENSG00000073792	IGF2BP2	5.35863	3.02904	7.00383	7.40906	0.581956	-0.781017	0.462246	down	no
ENST00000356360	ENSG00000073921	PICALM	0.361926	0.613335	0.266638	2.37437	0.369276	-1.43723	0.310293	down	no
ENST00000393346	ENSG00000073921	PICALM	31.2044	22.5666	17.1425	16.2842	1.60863	0.685831	0.260164	up	no
ENST00000526033	ENSG00000073921	PICALM	0	2.38965	9.90091	13.9758	0.100083	-3.32073	0.0519731	down	no
ENST00000528398	ENSG00000073921	PICALM	1.78536	2.19728	0.508723	0.856731	2.91671	1.54434	0.25218	up	no
ENST00000630913	ENSG00000073921	PICALM	0.302753	0.250566	0.445903	1.11113	0.355367	-1.49262	0.255737	down	no
ENST00000263710	ENSG00000074054	CLASP1	8.30315	8.3438	0.21381	8.43624	1.92449	0.944477	0.400337	up	no
ENST00000472776	ENSG00000074054	CLASP1	0.579963	0.421332	0.066052	0.358753	2.35707	1.23699	0.418965	up	no
ENST00000541377	ENSG00000074054	CLASP1	0.559182	0.624905	8.67113	0.812717	0.124853	-3.0017	0.00704551	down	yes
ENST00000263360	ENSG00000074266	EED	1.1314	1.61483	0.4677	0.915546	1.98535	0.989394	0.460535	up	no
ENST00000434178	ENSG00000074416	MGLL	1.68281	5.93128	1.02377	1.20741	3.41259	1.77087	0.115911	up	no
ENST00000453507	ENSG00000074416	MGLL	0.770369	0	1.33296	1.27684	0.295182	-1.76032	0.35113	down	no
ENST00000300141	ENSG00000074603	DPP8	2.13844	1.03074	2.5075	3.04333	0.570937	-0.808596	0.385217	down	no
ENST00000341861	ENSG00000074603	DPP8	2.23101	2.77436	1.06156	0.858555	2.60681	1.38229	0.162987	up	no
ENST00000571272	ENSG00000074660	SCARF1	0.577968	0.42013	1.73052	0.757447	0.401171	-1.31771	0.309236	down	no
ENST00000576012	ENSG00000074660	SCARF1	0.404849	0.55249	0.942305	0.913259	0.515929	-0.954756	0.440749	down	no
ENST00000159087	ENSG00000074855	ANO8	0.776861	1.1186	0.271136	0.655379	2.04579	1.03266	0.446483	up	no
ENST00000597643	ENSG00000074855	ANO8	0.55013	0.013487	0.606228	0.771374	0.409129	-1.28937	0.411995	down	no
ENST00000605457	ENSG00000074935	TUBE1	2.26628	1.39512	0.264885	0.486	4.8761	2.28573	0.0942031	up	no
ENST00000400422	ENSG00000075151	EIF4G3	1.8083	3.63422	7.82043	7.67189	0.351304	-1.50921	0.044359	down	yes
ENST00000634879	ENSG00000075151	EIF4G3	11.0891	8.64343	2.83239	2.52608	3.6825	1.88069	0.0108514	up	yes
ENST00000551744	ENSG00000075188	NUP37	0.175813	0	1.18767	1.123	0.0760875	-3.7162	0.0508871	down	no
ENST00000672580	ENSG00000075239	ACAT1	0	0	10.9916	16.3786	-inf	-inf	7.35058e-10	down	yes
ENST00000408031	ENSG00000075240	GRAMD4	0.061617	0.319836	1.03076	0.221691	0.304565	-1.71518	0.241168	down	no
ENST00000416682	ENSG00000075413	MARK3	0	1.03608	1.43833	2.1325	0.290152	-1.78512	0.338956	down	no
ENST00000553942	ENSG00000075413	MARK3	5.78619	0	9.5756	8.00779	0.329071	-1.60353	0.369081	down	no
ENST00000551123	ENSG00000075415	SLC25A3	10.8675	7.42539	4.01882	3.90534	2.30849	1.20695	0.290524	up	no
ENST00000336824	ENSG00000075420	FNDC3B	1.32185	0	2.9979	1.0666	0.325218	-1.62052	0.378455	down	no
ENST00000462494	ENSG00000075624	ACTB	64.5636	75.7164	67.314	33.4784	1.39177	0.476923	0.457863	up	no
ENST00000642480	ENSG00000075624	ACTB	81.2414	120.644	123.112	1029.43	0.175166	-2.5132	0.00260824	down	yes
ENST00000646664	ENSG00000075624	ACTB	1323.78	1155.26	1262.11	53.985	1.88364	0.913521	0.368246	up	no
ENST00000346964	ENSG00000075711	DLG1	0.145768	2.80537	2.85856	2.88334	0.513965	-0.960258	0.442144	down	no
ENST00000357674	ENSG00000075711	DLG1	0.154126	1.23929	0.242273	0.262207	2.76208	1.46575	0.31606	up	no
ENST00000450955	ENSG00000075711	DLG1	0.053545	0.20372	0.394157	0.404248	0.322224	-1.63387	0.25666	down	no
ENST00000661013	ENSG00000075711	DLG1	1.74381	1.96888	0	0.630168	5.89159	2.55866	0.184618	up	no
ENST00000667157	ENSG00000075711	DLG1	0.170327	1.02119	2.26343	2.27103	0.26277	-1.92813	0.135603	down	no
ENST00000674748	ENSG00000075785	RAB7A	2.97564	0	20.2891	31.5243	0.0574299	-4.12205	0.0153704	down	yes
ENST00000675712	ENSG00000075785	RAB7A	3.67348	3.36681	7.94719	7.00879	0.470734	-1.08702	0.22001	down	no
ENST00000355243	ENSG00000075891	PAX2	0.124447	0.10262	0.639353	0.473329	0.204072	-2.29285	0.0773745	down	no
ENST00000361791	ENSG00000075891	PAX2	0.518064	0.836354	0	0	inf	inf	3.20448e-05	up	yes
ENST00000468667	ENSG00000075914	EXOSC7	2.88349	1.14542	0.978979	0	4.11542	2.04104	0.291408	up	no
ENST00000552916	ENSG00000076067	RBMS2	0.645755	0.763407	0.884784	1.69511	0.54621	-0.872473	0.483677	down	no
ENST00000367749	ENSG00000076258	FMO4	0.546049	0.505653	0.203506	0.285604	2.15024	1.1045	0.425857	up	no
ENST00000483154	ENSG00000076321	KLHL20	0.506587	0.678651	1.20954	1.00275	0.535751	-0.900364	0.502724	down	no
ENST00000618626	ENSG00000076351	SLC46A1	0	0.385457	1.06886	0.269859	0.287929	-1.79622	0.340797	down	no
ENST00000592945	ENSG00000076662	ICAM3	0	0	1.2998	2.27645	-inf	-inf	0.000196115	down	yes
ENST00000343289	ENSG00000076685	NT5C2	0.003754	0	4.00435	4.2076	0.000457139	-11.0951	5.82589e-08	down	yes
ENST00000674728	ENSG00000076685	NT5C2	4.00817	1.58034	0.453383	0.401544	6.53682	2.70859	0.0320977	up	yes
ENST00000674860	ENSG00000076685	NT5C2	0.364564	0.231711	0.034419	0	17.324	4.1147	0.0315959	up	yes
ENST00000675020	ENSG00000076685	NT5C2	0.427457	0.233507	0.184982	0.103707	2.28954	1.19506	0.415743	up	no
ENST00000675164	ENSG00000076685	NT5C2	0	0.000295	3.03696	2.6503	5.18703e-05	-14.2347	8.38678e-08	down	yes
ENST00000611549	ENSG00000076864	RAP1GAP	0.001827	0.210288	0.056047	0.643737	0.303115	-1.72206	0.347106	down	no
ENST00000347545	ENSG00000076928	ARHGEF1	3.1417	2.12807	1.48	0.645867	2.47889	1.30969	0.310498	up	no
ENST00000354532	ENSG00000076928	ARHGEF1	6.35503	2.63762	16.1636	15.6757	0.282439	-1.82399	0.0165199	down	yes
ENST00000378152	ENSG00000076928	ARHGEF1	2.33801	2.14884	1.19831	1.13017	1.92694	0.946314	0.456669	up	no
ENST00000599846	ENSG00000076928	ARHGEF1	3.58461	7.435	0	0	inf	inf	1.63701e-09	up	yes
ENST00000600274	ENSG00000076928	ARHGEF1	2.4399	1.52371	0.305301	0.224675	7.47885	2.90282	0.0341621	up	yes
ENST00000597068	ENSG00000076944	STXBP2	0.32594	0.212634	1.65424	0.740059	0.22494	-2.15239	0.102419	down	no
ENST00000397981	ENSG00000076984	MAP2K7	1.13909	3.05435	0.038646	1.90551	2.15695	1.10899	0.495021	up	no
ENST00000490764	ENSG00000077044	DGKD	0.171659	0.168433	0.464616	0.274464	0.460156	-1.11981	0.410768	down	no
ENST00000441556	ENSG00000077063	CTTNBP2	0	0.080912	0.216952	0.72457	0.0859375	-3.54057	0.0519314	down	no
ENST00000435706	ENSG00000077097	TOP2B	12.4529	6.04767	15.0016	13.6846	0.64493	-0.632785	0.3046	down	no
ENST00000428099	ENSG00000077150	NFKB2	1.91268	1.0442	0.950409	0	3.11117	1.63746	0.403436	up	no
ENST00000661543	ENSG00000077150	NFKB2	1.87972	3.1559	3.67172	4.96039	0.583358	-0.777545	0.454572	down	no
ENST00000487227	ENSG00000077152	UBE2T	5.96405	6.31057	2.16309	2.35412	2.7173	1.44218	0.266178	up	no
ENST00000616986	ENSG00000077232	DNAJC10	1.99069	1.96356	0.328692	0	12.0302	3.58859	0.061965	up	no
ENST00000395762	ENSG00000077238	IL4R	5.36659	4.58185	1.62706	3.70428	1.86603	0.899973	0.385329	up	no
ENST00000543915	ENSG00000077238	IL4R	1.21095	0.540657	4.54054	3.71286	0.212229	-2.23631	0.0552434	down	no
ENST00000568746	ENSG00000077238	IL4R	0.342221	0.708689	0.034744	0.134349	6.21498	2.63575	0.0869596	up	no
ENST00000370793	ENSG00000077254	USP33	9.61521	3.67664	0	4.86113	2.73431	1.45118	0.421667	up	no
ENST00000370794	ENSG00000077254	USP33	1.87112	5.59217	8.16239	5.08209	0.563502	-0.827509	0.32905	down	no
ENST00000340296	ENSG00000077380	DYNC1I2	7.65887	2.52965	1.67323	2.53959	2.41846	1.27409	0.283122	up	no
ENST00000409197	ENSG00000077380	DYNC1I2	7.77987	1.62383	1.18436	2.35564	2.65641	1.40948	0.268048	up	no
ENST00000409317	ENSG00000077380	DYNC1I2	2.44198	18.8572	19.3778	16.7904	0.588892	-0.763925	0.378517	down	no
ENST00000452242	ENSG00000077380	DYNC1I2	4.51252	3.60182	1.72636	0.593017	3.4985	1.80674	0.193156	up	no
ENST00000479806	ENSG00000077380	DYNC1I2	0.420187	2.28389	0.478392	0.287187	3.53206	1.82051	0.206138	up	no
ENST00000536839	ENSG00000077458	FAM76B	0	0.297019	0.321626	0.425044	0.397792	-1.32992	0.475944	down	no
ENST00000264202	ENSG00000077549	CAPZB	54.4023	56.6459	56.5427	15.2258	1.54731	0.629762	0.396005	up	no
ENST00000375144	ENSG00000077549	CAPZB	1.49018	1.42182	2.11529	9.28215	0.255496	-1.96863	0.0383267	down	yes
ENST00000482808	ENSG00000077549	CAPZB	2.35634	1.66459	3.79846	18.3741	0.181347	-2.46318	0.028361	down	yes
ENST00000674299	ENSG00000077549	CAPZB	0.447581	0.299013	0.586532	1.1743	0.424	-1.23786	0.358886	down	no
ENST00000512960	ENSG00000077684	JADE1	0.117112	0.001997	0.764068	0.333446	0.108526	-3.20389	0.0619816	down	no
ENST00000674474	ENSG00000077782	FGFR1	0.167345	0.493655	0.181279	0.116202	2.22199	1.15185	0.42965	up	no
ENST00000629669	ENSG00000078070	MCCC1	0.611719	0.032985	0.641027	3.49997	0.155688	-2.68327	0.106998	down	no
ENST00000398870	ENSG00000078142	PIK3C3	0.780869	0.681565	0.649579	1.88678	0.576588	-0.794387	0.476072	down	no
ENST00000513269	ENSG00000078177	N4BP2	0.117229	0.276211	0.357752	0.350713	0.555341	-0.848553	0.49785	down	no
ENST00000355585	ENSG00000078269	SYNJ2	3.20235	0.066805	3.0808	3.30781	0.511716	-0.966583	0.448666	down	no
ENST00000638626	ENSG00000078269	SYNJ2	0.335422	3.27211	0.487741	0.33292	4.39589	2.13615	0.122321	up	no
ENST00000350249	ENSG00000078304	PPP2R5C	4.31265	7.96291	4.50478	2.10501	1.85718	0.893113	0.363428	up	no
ENST00000676274	ENSG00000078319	PMS2P1	0.991464	0.542426	1.842	1.92119	0.407604	-1.29476	0.31254	down	no
ENST00000485608	ENSG00000078618	NRDC	1.76781	0	0	7.01788	0.251901	-1.98907	0.457285	down	no
ENST00000524226	ENSG00000078674	PCM1	0.439587	0.494882	0.673033	1.03148	0.548234	-0.867138	0.480088	down	no
ENST00000636222	ENSG00000078687	TNRC6C	0.563745	1.86127	0.391201	0.574238	2.51182	1.32873	0.309321	up	no
ENST00000263741	ENSG00000078808	SDF4	1.4621	1.1421	2.12927	3.24934	0.484179	-1.04639	0.398367	down	no
ENST00000584470	ENSG00000079134	THOC1	0.0738	0.376239	0.334448	0.884567	0.369182	-1.43759	0.328559	down	no
ENST00000371945	ENSG00000079277	MKNK1	1.51037	1.0889	2.65438	1.91193	0.569228	-0.812921	0.499165	down	no
ENST00000395358	ENSG00000079337	RAPGEF3	0.647979	0.437214	0	0.380103	2.855	1.51349	0.41122	up	no
ENST00000549518	ENSG00000079387	SENP1	1.27794	2.91681	1.26086	0.985603	1.86726	0.900927	0.47248	up	no
ENST00000525607	ENSG00000079459	FDFT1	1.15988	1.23913	0	0	inf	inf	3.10711e-05	up	yes
ENST00000525900	ENSG00000079459	FDFT1	0	7.23214	16.8931	12.6318	0.244951	-2.02944	0.248757	down	no
ENST00000525954	ENSG00000079459	FDFT1	0.638214	0.187107	2.74296	3.05341	0.142386	-2.81212	0.0456946	down	yes
ENST00000528812	ENSG00000079459	FDFT1	2.35483	0.856029	0.229201	0.106662	9.56003	3.25701	0.0260512	up	yes
ENST00000623368	ENSG00000079459	FDFT1	3.31852	0.287177	0.782953	0.320648	3.26721	1.70806	0.267594	up	no
ENST00000568312	ENSG00000079616	KIF22	1.36225	2.49114	1.22913	0.623898	2.07951	1.05624	0.45686	up	no
ENST00000355667	ENSG00000079805	DNM2	2.75121	0	6.75437	11.4578	0.151064	-2.72677	0.120572	down	no
ENST00000368128	ENSG00000079819	EPB41L2	0	0.135901	1.03316	0.272542	0.104083	-3.26419	0.0779638	down	no
ENST00000452150	ENSG00000079819	EPB41L2	0.434244	0.290285	2.12396	0.666179	0.259675	-1.94522	0.152106	down	no
ENST00000530757	ENSG00000079819	EPB41L2	0	0.591592	0.662322	0.993091	0.357368	-1.48452	0.421479	down	no
ENST00000395593	ENSG00000079974	RABL2B	0.523602	0.515288	0.249929	0.108584	2.89777	1.53495	0.29608	up	no
ENST00000395598	ENSG00000079974	RABL2B	1.22512	1.1181	1.36309	2.84947	0.556247	-0.846203	0.49986	down	no
ENST00000428287	ENSG00000080345	RIF1	0	1.96454	2.85904	4.33517	0.273072	-1.87265	0.282035	down	no
ENST00000430328	ENSG00000080345	RIF1	0.931761	2.23443	0.065319	0.040031	30.054	4.90949	0.00068973	up	yes
ENST00000444746	ENSG00000080345	RIF1	4.67727	2.47458	1.39344	0.445496	3.88912	1.95944	0.0202747	up	yes
ENST00000453091	ENSG00000080345	RIF1	1.23929	0.249643	0.379711	0.088129	3.18258	1.6702	0.254819	up	no
ENST00000349721	ENSG00000080503	SMARCA2	0	0	8.38438	4.01898	-inf	-inf	3.31934e-14	down	yes
ENST00000357248	ENSG00000080503	SMARCA2	0.18405	0	3.31982	5.2218	0.0215474	-5.53634	0.00180593	down	yes
ENST00000382203	ENSG00000080503	SMARCA2	0.695662	0.766464	0	0.078437	18.6408	4.22039	0.0246542	up	yes
ENST00000634760	ENSG00000080503	SMARCA2	9.83372	7.56119	0.257492	0.084608	50.8474	5.6681	4.07102e-08	up	yes
ENST00000639760	ENSG00000080503	SMARCA2	0.877097	0.662242	0.083108	0.222075	5.04399	2.33456	0.0868042	up	no
ENST00000262518	ENSG00000080603	SRCAP	2.01381	0.59449	0.693879	0.672256	1.90925	0.933008	0.404245	up	no
ENST00000395059	ENSG00000080603	SRCAP	7.91858	7.61382	6.94786	4.38589	1.37046	0.454655	0.498836	up	no
ENST00000423368	ENSG00000080802	CNOT4	0.069938	1.90417	0.269231	0.092514	5.45719	2.44816	0.141895	up	no
ENST00000451834	ENSG00000080802	CNOT4	0.231059	0.349741	0.453575	0.654894	0.523966	-0.932455	0.449285	down	no
ENST00000357710	ENSG00000080815	PSEN1	4.02759	6.70805	3.24011	1.57462	2.22975	1.15688	0.305231	up	no
ENST00000502980	ENSG00000080822	CLDND1	1.67061	1.51702	0.264242	1.14028	2.26954	1.1824	0.426041	up	no
ENST00000334701	ENSG00000080824	HSP90AA1	0.661004	15.1564	2.30894	0.547854	5.53676	2.46904	0.0726673	up	no
ENST00000369615	ENSG00000081026	MAGI3	0.411744	1.39476	0	0	inf	inf	2.99643e-06	up	yes
ENST00000498274	ENSG00000081154	PCNP	0.888699	1.14548	5.63126	2.26809	0.257512	-1.95729	0.140111	down	no
ENST00000468227	ENSG00000081307	UBA5	2.27823	3.8212	1.35794	0.880095	2.72535	1.44644	0.228339	up	no
ENST00000494238	ENSG00000081307	UBA5	3.21883	0.031392	4.77272	5.72968	0.309474	-1.69211	0.262829	down	no
ENST00000375240	ENSG00000081377	CDC14B	2.21133	2.47065	0.44497	0.2891	6.3781	2.67313	0.0503784	up	no
ENST00000375241	ENSG00000081377	CDC14B	4.82505	1.54291	6.32009	6.34418	0.502829	-0.99186	0.226915	down	no
ENST00000412285	ENSG00000081377	CDC14B	0.0024	4.0523	0	0.564495	7.18288	2.84456	0.263811	up	no
ENST00000587822	ENSG00000081665	ZNF506	0.309841	0.341124	0.112609	0.170148	2.30221	1.20302	0.397179	up	no
ENST00000366758	ENSG00000081692	JMJD4	0.421162	1.06904	0.229284	0.153523	3.89284	1.96082	0.155869	up	no
ENST00000615711	ENSG00000081692	JMJD4	2.20771	0.78663	0.14786	0.144846	10.2299	3.35472	0.0211862	up	yes
ENST00000620518	ENSG00000081692	JMJD4	1.01538	1.55896	4.3076	3.82766	0.316443	-1.65998	0.164155	down	no
ENST00000262188	ENSG00000082014	SMARCD3	6.22045	0.535838	0.622268	1.30337	3.5086	1.8109	0.224626	up	no
ENST00000392811	ENSG00000082014	SMARCD3	2.43318	9.33596	8.58291	12.0105	0.571502	-0.80717	0.401419	down	no
ENST00000469154	ENSG00000082014	SMARCD3	4.19877	2.81297	1.89124	0.762619	2.64209	1.40168	0.27888	up	no
ENST00000640967	ENSG00000082212	ME2	1.66603	0.915796	3.70626	0.988961	0.549885	-0.862799	0.498091	down	no
ENST00000510659	ENSG00000082213	C5orf22	1.0806	1.26185	0.468467	0	5.00023	2.322	0.22158	up	no
ENST00000264157	ENSG00000082258	CCNT2	3.38842	3.5917	2.19441	2.28585	1.55797	0.639667	0.477071	up	no
ENST00000419781	ENSG00000082258	CCNT2	0.968518	1.08788	1.38164	2.10623	0.589587	-0.762224	0.498088	down	no
ENST00000392717	ENSG00000082438	COBLL1	0.681608	0.344718	0.383123	0.130643	1.99765	0.998306	0.465879	up	no
ENST00000489955	ENSG00000082438	COBLL1	0.146703	0.081497	0.196941	0.412135	0.374666	-1.41632	0.30045	down	no
ENST00000357480	ENSG00000082641	NFE2L1	20.2953	22.1191	12.3939	19.123	1.34577	0.42843	0.497747	up	no
ENST00000361665	ENSG00000082641	NFE2L1	11.4893	4.42645	3.03841	6.7467	1.62653	0.701796	0.404903	up	no
ENST00000362042	ENSG00000082641	NFE2L1	2.96808	5.43776	14.2346	8.15086	0.375505	-1.4131	0.0471707	down	yes
ENST00000585291	ENSG00000082641	NFE2L1	1.49759	2.0047	5.4523	3.26965	0.401548	-1.31635	0.180453	down	no
ENST00000316626	ENSG00000082701	GSK3B	1.53566	1.1295	4.04913	1.37341	0.491498	-1.02474	0.424518	down	no
ENST00000347735	ENSG00000082805	ERC1	0.182862	0	0.528066	0.008676	0.340689	-1.55347	0.475988	down	no
ENST00000360905	ENSG00000082805	ERC1	0	0.009558	2.46981	5.33308	0.00122493	-9.67308	2.46026e-10	down	yes
ENST00000543086	ENSG00000082805	ERC1	0	0	1.83977	1.70966	-inf	-inf	3.01233e-09	down	yes
ENST00000589028	ENSG00000082805	ERC1	5.03923	7.67611	1.74516	0.749708	5.0966	2.34954	0.00290953	up	yes
ENST00000404992	ENSG00000082898	XPO1	0.204673	2.66289	0.913274	5.52344	0.445501	-1.1665	0.390414	down	no
ENST00000361785	ENSG00000082996	RNF13	0.288536	0.859384	0.234636	2.40743	0.434477	-1.20265	0.40538	down	no
ENST00000265713	ENSG00000083168	KAT6A	7.12127	14.9095	0	0	inf	inf	3.98733e-27	up	yes
ENST00000396930	ENSG00000083168	KAT6A	12.5454	4.62178	17.8633	21.9967	0.430686	-1.21529	0.0547193	down	no
ENST00000406337	ENSG00000083168	KAT6A	0	0	1.57474	1.5285	-inf	-inf	1.27541e-08	down	yes
ENST00000277141	ENSG00000083223	TUT7	0.115584	4.23598	3.88485	6.10235	0.435714	-1.19855	0.317141	down	no
ENST00000361658	ENSG00000083290	ULK2	0	0	1.36699	1.70223	-inf	-inf	1.24353e-06	down	yes
ENST00000395544	ENSG00000083290	ULK2	1.26754	1.2514	0.599895	0.7571	1.85626	0.8924	0.438973	up	no
ENST00000225328	ENSG00000083454	P2RX5	1.92574	1.21899	3.00313	3.29937	0.498966	-1.00299	0.411208	down	no
ENST00000345901	ENSG00000083454	P2RX5	0.916482	1.69284	0.313742	0.199284	5.08614	2.34657	0.0862974	up	no
ENST00000551178	ENSG00000083454	P2RX5	1.57822	2.16666	0.175633	1.24877	2.62909	1.39456	0.333743	up	no
ENST00000471710	ENSG00000083544	TDRD3	0.324879	0.360034	0.174607	0.175416	1.95677	0.968471	0.491816	up	no
ENST00000563629	ENSG00000083799	CYLD	0.446799	0.201484	0.275263	2.44669	0.238168	-2.06995	0.161326	down	no
ENST00000569891	ENSG00000083799	CYLD	0.380769	0.083053	0.445218	0.714573	0.399919	-1.32222	0.329154	down	no
ENST00000599232	ENSG00000083845	RPS5	0.943143	0.691269	0.434517	0.248243	2.39383	1.25932	0.371972	up	no
ENST00000601521	ENSG00000083845	RPS5	58.201	6.93604	7.38586	14.3744	2.99339	1.58178	0.121118	up	no
ENST00000355665	ENSG00000083896	YTHDC1	9.32541	0.491731	3.26514	0.318544	2.7394	1.45386	0.330208	up	no
ENST00000579690	ENSG00000083896	YTHDC1	4.09961	1.36797	1.10339	1.50699	2.09455	1.06664	0.406914	up	no
ENST00000356511	ENSG00000084072	PPIE	1.76695	0.75491	2.53646	2.40406	0.510444	-0.970176	0.445404	down	no
ENST00000475350	ENSG00000084072	PPIE	3.82267	5.69827	1.95043	1.67525	2.62597	1.39285	0.288946	up	no
ENST00000482751	ENSG00000084072	PPIE	0.451004	3.4996	7.94097	4.24538	0.324183	-1.62512	0.180805	down	no
ENST00000675937	ENSG00000084073	ZMPSTE24	2.11626	0.331479	4.90032	3.37164	0.295909	-1.75678	0.158196	down	no
ENST00000398603	ENSG00000084207	GSTP1	11.0173	14.0222	6.11891	4.04774	2.46291	1.30036	0.297713	up	no
ENST00000348332	ENSG00000084676	NCOA1	4.10761	2.76774	1.32519	1.29439	2.6246	1.3921	0.147554	up	no
ENST00000395856	ENSG00000084676	NCOA1	0.331156	0.701352	3.57756	0.508515	0.252689	-1.98456	0.120547	down	no
ENST00000233121	ENSG00000084764	MAPRE3	0.066579	0.515034	0.639791	0.643929	0.453068	-1.1422	0.428782	down	no
ENST00000264705	ENSG00000084774	CAD	9.35486	9.20379	12.1921	15.0676	0.680811	-0.554674	0.31607	down	no
ENST00000403525	ENSG00000084774	CAD	16.1296	13.9266	11.3459	9.49701	1.44203	0.528106	0.391113	up	no
ENST00000351554	ENSG00000085063	CD59	2.31168	4.29183	8.65221	4.34488	0.508076	-0.976884	0.436426	down	no
ENST00000528987	ENSG00000085063	CD59	0.868788	0.548127	2.4215	0.740201	0.448149	-1.15795	0.369022	down	no
ENST00000395603	ENSG00000085224	ATRX	1.11068	6.40106	3.21513	0.703097	1.91713	0.938949	0.368762	up	no
ENST00000602751	ENSG00000085274	MYNN	1.16138	0.205988	0.428233	0	3.19306	1.67494	0.392183	up	no
ENST00000262903	ENSG00000085382	HACE1	0	1.83789	2.40944	2.11878	0.405876	-1.30089	0.478725	down	no
ENST00000590843	ENSG00000085415	SEH1L	0.129299	1.77198	0.175468	0.245228	4.51937	2.17612	0.160994	up	no
ENST00000366919	ENSG00000085511	MAP3K4	0.651253	3.77674	1.40449	0.824069	1.98693	0.990542	0.441185	up	no
ENST00000517490	ENSG00000085719	CPNE3	37.8979	39.4987	53.6077	57.2851	0.697941	-0.518823	0.312675	down	no
ENST00000614678	ENSG00000085719	CPNE3	18.0882	20.6714	0.191729	0.335922	73.457	6.19883	5.13293e-13	up	yes
ENST00000482755	ENSG00000085733	CTTN	0.204697	0.553764	0.749223	0.733709	0.51146	-0.967306	0.492082	down	no
ENST00000517385	ENSG00000085788	DDHD2	0.652228	0.771766	0.233909	0.306096	2.637	1.3989	0.289764	up	no
ENST00000198939	ENSG00000085872	CHERP	5.27645	3.46007	4.76269	9.46496	0.614052	-0.703568	0.384699	down	no
ENST00000474148	ENSG00000085978	ATG16L1	0.579045	0.844944	0.167033	0.284876	3.15105	1.65583	0.214367	up	no
ENST00000427112	ENSG00000085982	USP40	0	0	0.262244	1.12753	-inf	-inf	1.61797e-05	down	yes
ENST00000371992	ENSG00000085998	POMGNT1	0.379022	0.388877	0.163884	0.146238	2.47612	1.30808	0.358638	up	no
ENST00000372009	ENSG00000086015	MAST2	0.425699	2.69147	0.398463	0.959035	2.29626	1.19928	0.403894	up	no
ENST00000674079	ENSG00000086015	MAST2	1.09266	3.34611	4.42965	3.47586	0.561478	-0.8327	0.377491	down	no
ENST00000509052	ENSG00000086598	TMED2	1.03615	2.11806	0.8963	0.53146	2.2092	1.14352	0.399725	up	no
ENST00000262854	ENSG00000086758	HUWE1	15.4735	13.4658	21.1814	16.4732	0.768545	-0.379798	0.457185	down	no
ENST00000535142	ENSG00000086827	ZW10	4.34904	0.864121	0	0	inf	inf	2.70067e-06	up	yes
ENST00000503233	ENSG00000087008	ACOX3	0.042503	0.587295	1.41546	0.967073	0.26434	-1.91953	0.18885	down	no
ENST00000352297	ENSG00000087053	MTMR2	0.677741	5.31782	0.989907	1.29096	2.62864	1.39432	0.308383	up	no
ENST00000409459	ENSG00000087053	MTMR2	1.01691	2.87626	0.909621	0.836761	2.22928	1.15658	0.383264	up	no
ENST00000675910	ENSG00000087053	MTMR2	0.283563	0.498405	1.97644	1.15779	0.249493	-2.00293	0.120062	down	no
ENST00000676166	ENSG00000087053	MTMR2	0.406698	0	0	2.50982	0.162043	-2.62555	0.325608	down	no
ENST00000676177	ENSG00000087053	MTMR2	0.899018	0.899534	0.74888	2.88538	0.494888	-1.01483	0.410408	down	no
ENST00000676261	ENSG00000087053	MTMR2	3.96545	3.13494	0.856877	0.986512	3.85181	1.94554	0.106237	up	no
ENST00000619988	ENSG00000087077	TRIP6	1.23709	0.157718	5.9203	0.966987	0.202519	-2.30387	0.138618	down	no
ENST00000611405	ENSG00000087087	SRRT	25.3273	21.1751	14.4266	16.5987	1.49886	0.583861	0.37087	up	no
ENST00000618411	ENSG00000087087	SRRT	4.15657	7.84188	8.11154	11.4266	0.614105	-0.703442	0.379285	down	no
ENST00000308360	ENSG00000087111	PIGS	2.0535	0.648243	0	0	inf	inf	8.00931e-06	up	yes
ENST00000589426	ENSG00000087157	PGS1	0.472218	1.70953	0.075728	0.746192	2.65446	1.40842	0.351344	up	no
ENST00000310144	ENSG00000087191	PSMC5	13.1311	16.9758	60.1558	13.7341	0.407455	-1.29529	0.10682	down	no
ENST00000578570	ENSG00000087191	PSMC5	54.4187	47.1718	11.6543	54.1464	1.54391	0.626591	0.412914	up	no
ENST00000503393	ENSG00000087266	SH3BP2	0	3.67839	0.226007	0	16.2756	4.02464	0.151761	up	no
ENST00000314262	ENSG00000087269	NOP14	2.35342	0	8.60301	0.533178	0.257593	-1.95683	0.330428	down	no
ENST00000398129	ENSG00000087274	ADD1	13.133	13.851	21.1291	16.3286	0.720387	-0.473156	0.410805	down	no
ENST00000506157	ENSG00000087274	ADD1	0	0.174874	0.394427	0.417294	0.215436	-2.21467	0.209039	down	no
ENST00000265620	ENSG00000087460	GNAS	70.9786	50.3769	60.2834	121.272	0.668423	-0.581166	0.313884	down	no
ENST00000480975	ENSG00000087460	GNAS	40.2537	54.0143	41.5772	5.96612	1.98278	0.987523	0.258214	up	no
ENST00000266481	ENSG00000087470	DNM1L	17.0594	1.86035	2.27863	0.936467	5.88466	2.55696	0.0321445	up	yes
ENST00000549701	ENSG00000087470	DNM1L	2.75734	1.38628	12.052	0.943378	0.318854	-1.64903	0.141029	down	no
ENST00000312783	ENSG00000087586	AURKA	3.58833	4.08131	4.24833	16.3047	0.373163	-1.42212	0.158496	down	no
ENST00000395914	ENSG00000087586	AURKA	4.41345	2.0609	10.4904	7.6898	0.35612	-1.48956	0.137828	down	no
ENST00000395915	ENSG00000087586	AURKA	10.4637	10.6442	2.12845	5.87631	2.63691	1.39885	0.171649	up	no
ENST00000422322	ENSG00000087586	AURKA	6.48611	6.25967	0	0.24085	52.92	5.72574	0.00259101	up	yes
ENST00000380420	ENSG00000087842	PIR	0.876523	0	1.31289	0.756279	0.423612	-1.23919	0.504601	down	no
ENST00000303657	ENSG00000087903	RFX2	0.778536	0.495872	0.809229	1.96748	0.458964	-1.12355	0.378835	down	no
ENST00000644245	ENSG00000088038	CNOT3	1.13615	1.30226	2.57967	2.80236	0.453064	-1.14221	0.361035	down	no
ENST00000373950	ENSG00000088367	EPB41L1	0.010059	0	0.259865	4.66452	0.00204269	-8.93531	0.000111539	down	yes
ENST00000441639	ENSG00000088367	EPB41L1	8.82047	3.05595	3.07102	3.40066	1.83514	0.875887	0.301766	up	no
ENST00000630992	ENSG00000088387	DOCK9	1.7e-05	0.008805	0.33418	0.821867	0.00763118	-7.03388	0.000125923	down	yes
ENST00000475809	ENSG00000088448	ANKRD10	1.6623	1.65428	3.18143	4.12572	0.453882	-1.13961	0.362276	down	no
ENST00000569980	ENSG00000088682	COQ9	1.92397	1.54918	0.422133	1.18594	2.15982	1.11091	0.407305	up	no
ENST00000555825	ENSG00000088808	PPP1R13B	0.334515	0.15644	0.402907	0.605254	0.486981	-1.03806	0.417981	down	no
ENST00000446916	ENSG00000088812	ATRN	1.23842	1.18701	1.82199	2.99215	0.503815	-0.989034	0.392146	down	no
ENST00000621355	ENSG00000088826	SMOX	0.543656	0.425636	0.773103	1.35575	0.455311	-1.13507	0.370922	down	no
ENST00000439640	ENSG00000088832	FKBP1A	2.56184	0	4.39848	2.57274	0.367487	-1.44423	0.446409	down	no
ENST00000216879	ENSG00000088833	NSFL1C	7.05314	5.83365	8.99703	10.4549	0.662493	-0.594023	0.402939	down	no
ENST00000647296	ENSG00000088836	SLC4A11	2.3477	1.90274	1.46291	0.641416	2.01986	1.01426	0.442357	up	no
ENST00000424576	ENSG00000089009	RPL6	548.739	497.93	449.878	954.826	0.745117	-0.424462	0.442039	down	no
ENST00000548343	ENSG00000089009	RPL6	7.52466	8.53871	2.65256	3.98129	2.42142	1.27585	0.331059	up	no
ENST00000550238	ENSG00000089009	RPL6	0	15.4579	2.78778	0	5.54486	2.47115	0.339601	up	no
ENST00000553205	ENSG00000089009	RPL6	2.9966	4.23295	18.3763	3.05194	0.337384	-1.56754	0.22524	down	no
ENST00000551404	ENSG00000089022	MAPKAPK5	0.921154	1.058	1.41593	2.9162	0.456854	-1.13019	0.377441	down	no
ENST00000441917	ENSG00000089053	ANAPC5	0.15187	1.1981	4.24613	1.0681	0.254028	-1.97694	0.17634	down	no
ENST00000546737	ENSG00000089060	SLC8B1	0.978213	1.53022	0.69657	0	3.60111	1.84844	0.319667	up	no
ENST00000552014	ENSG00000089060	SLC8B1	0	0.857173	0.581888	1.45045	0.421768	-1.24548	0.501864	down	no
ENST00000608192	ENSG00000089091	DZANK1	0.242506	0.047919	0.527425	0.097626	0.464642	-1.10581	0.46976	down	no
ENST00000202917	ENSG00000089127	OAS1	0.985346	0.389181	2.97988	2.67525	0.243058	-2.04063	0.128836	down	no
ENST00000313104	ENSG00000089157	RPLP0	17.7288	196.338	66.4941	42.89	1.95701	0.968654	0.298938	up	no
ENST00000546989	ENSG00000089157	RPLP0	9.7957	0	50.7188	19.0432	0.140416	-2.83222	0.107947	down	no
ENST00000549098	ENSG00000089157	RPLP0	66.3946	19.0538	73.2504	151.897	0.379521	-1.39775	0.049943	down	yes
ENST00000228307	ENSG00000089159	PXN	15.6183	12.5726	3.04538	9.69205	2.21324	1.14616	0.140043	up	no
ENST00000536957	ENSG00000089159	PXN	9.92962	37.9194	46.6975	22.0668	0.69584	-0.523171	0.426778	down	no
ENST00000342206	ENSG00000089289	IGBP1	0.158869	7.65613	13.2463	20.1486	0.234017	-2.09531	0.107067	down	no
ENST00000356413	ENSG00000089289	IGBP1	20.5411	15.1358	6.27777	0.839008	5.01306	2.32569	0.0380184	up	yes
ENST00000392219	ENSG00000089327	FXYD5	9.83183	2.03768	59.8808	25.4097	0.139166	-2.84512	0.0058773	down	yes
ENST00000543307	ENSG00000089327	FXYD5	12.0959	16.813	4.91162	3.97362	3.25359	1.70203	0.13817	up	no
ENST00000505242	ENSG00000089335	ZNF302	0.548589	1.84087	0.676465	0	3.53228	1.8206	0.355137	up	no
ENST00000411896	ENSG00000089351	GRAMD1A	8.32193	13.3648	2.57223	10.4889	1.6604	0.73153	0.448039	up	no
ENST00000599564	ENSG00000089351	GRAMD1A	0	0	8.05899	1.69946	-inf	-inf	1.03406e-07	down	yes
ENST00000534419	ENSG00000089597	GANAB	0.173842	0	1.76727	1.33693	0.0560023	-4.15837	0.0273069	down	yes
ENST00000540933	ENSG00000089597	GANAB	0.442862	0.61853	0	3.54776	0.299172	-1.74095	0.39306	down	no
ENST00000372479	ENSG00000089682	RBM41	0.645973	1.67165	0.695286	0.388838	2.13778	1.09611	0.420596	up	no
ENST00000301633	ENSG00000089685	BIRC5	7.00666	9.63128	6.08543	4.29948	1.60213	0.679989	0.472639	up	no
ENST00000537126	ENSG00000089693	MLF2	14.4295	4.90539	6.68743	0.656534	2.63277	1.39658	0.339672	up	no
ENST00000544005	ENSG00000089737	DDX24	0.2227	0.765737	0.360679	2.35942	0.363383	-1.46044	0.307234	down	no
ENST00000622786	ENSG00000089737	DDX24	0.411541	1.14872	0.252824	2.86466	0.500486	-0.998598	0.490441	down	no
ENST00000450991	ENSG00000089818	NECAP1	1.23047	0.444279	0	0	inf	inf	5.17219e-05	up	yes
ENST00000537796	ENSG00000089818	NECAP1	0.895168	0.710606	0.499307	0.133983	2.53561	1.34233	0.334725	up	no
ENST00000638883	ENSG00000089818	NECAP1	2.44027	1.1073	0.787716	0.337585	3.15255	1.65652	0.21845	up	no
ENST00000640648	ENSG00000089818	NECAP1	0.907059	3.30924	6.84307	1.9223	0.481018	-1.05584	0.299286	down	no
ENST00000600132	ENSG00000089847	ANKRD24	0.146272	0.097743	0.264323	0.290254	0.440002	-1.18442	0.379973	down	no
ENST00000262241	ENSG00000089902	RCOR1	10.2068	10.3422	14.0791	14.0114	0.73153	-0.451011	0.41823	down	no
ENST00000621494	ENSG00000089916	GPATCH2L	1.17354	1.13479	0.701283	0.271497	2.37293	1.24667	0.279134	up	no
ENST00000204005	ENSG00000090006	LTBP4	0	1.32481	2.61679	1.38141	0.331351	-1.59357	0.390542	down	no
ENST00000374089	ENSG00000090020	SLC9A1	0.381518	0.491087	0.2215	0.143825	2.38857	1.25615	0.362358	up	no
ENST00000398838	ENSG00000090238	YPEL3	1.78301	0.950127	0	0	inf	inf	0.000173539	up	yes
ENST00000398841	ENSG00000090238	YPEL3	0.156681	0.515191	1.36134	1.44667	0.23927	-2.06329	0.118991	down	no
ENST00000467334	ENSG00000090263	MRPS33	0.300567	0.872861	1.57069	1.56709	0.373967	-1.41902	0.313425	down	no
ENST00000263280	ENSG00000090372	STRN4	13.6617	7.82235	16.3576	15.063	0.683758	-0.548442	0.397875	down	no
ENST00000391910	ENSG00000090372	STRN4	7.34793	9.30854	4.61571	5.08467	1.71709	0.779968	0.350113	up	no
ENST00000594581	ENSG00000090372	STRN4	0.757699	1.35464	0.563565	0.470998	2.04177	1.02982	0.445018	up	no
ENST00000416889	ENSG00000090487	SPG21	0.716641	0.863906	5.67356	4.14429	0.160987	-2.63498	0.0447568	down	yes
ENST00000559199	ENSG00000090487	SPG21	0.204093	0.345761	0.8219	1.11548	0.283813	-1.81699	0.154432	down	no
ENST00000527168	ENSG00000090581	GNPTG	0.646403	0.68642	0.171633	0.153266	4.10227	2.03642	0.166964	up	no
ENST00000372856	ENSG00000090621	PABPC4	13.2291	5.98848	1.07028	7.06677	2.36173	1.23985	0.235939	up	no
ENST00000372862	ENSG00000090621	PABPC4	3.57025	3.4819	8.49532	7.75024	0.434097	-1.20391	0.204572	down	no
ENST00000394321	ENSG00000090674	MCOLN1	0.205205	0.443592	0.87919	0.476292	0.478647	-1.06297	0.428596	down	no
ENST00000447066	ENSG00000090863	GLG1	0	0.243741	0	4.79932	0.0507866	-4.29941	0.12199	down	no
ENST00000491718	ENSG00000090905	TNRC6A	0.017249	0.451349	0.882921	1.19941	0.225035	-2.15178	0.15356	down	no
ENST00000205135	ENSG00000090924	PLEKHG2	0.872097	0.662979	0.204693	0	7.49941	2.90678	0.11854	up	no
ENST00000320201	ENSG00000090975	PITPNM2	0.317915	1.8985	0.224461	0.721619	2.34273	1.22819	0.386447	up	no
ENST00000346134	ENSG00000090989	EXOC1	4.1725	4.98496	3.25782	1.41087	1.96146	0.971928	0.37898	up	no
ENST00000349598	ENSG00000090989	EXOC1	0.742711	0.283328	1.77727	0.672283	0.418867	-1.25544	0.346705	down	no
ENST00000261183	ENSG00000091039	OSBPL8	13.1477	9.21057	7.14421	6.33306	1.65896	0.730281	0.252573	up	no
ENST00000611266	ENSG00000091039	OSBPL8	4.39409	10.4894	11.4309	12.4394	0.623514	-0.681505	0.268041	down	no
ENST00000222399	ENSG00000091136	LAMB1	18.6255	18.5075	16.1603	8.01827	1.53578	0.618971	0.340226	up	no
ENST00000393561	ENSG00000091136	LAMB1	0.4776	0.783297	0.554674	8.55973	0.138341	-2.8537	0.0246716	down	yes
ENST00000264107	ENSG00000091409	ITGA6	4.87639	3.32419	2.75622	2.46107	1.57181	0.652426	0.482246	up	no
ENST00000573366	ENSG00000091640	SPAG7	0.415863	2.95914	1.04334	0.591362	2.06461	1.04587	0.479903	up	no
ENST00000477578	ENSG00000091732	ZC3HC1	1.18222	0.940917	3.6475	0.718493	0.486289	-1.04011	0.428327	down	no
ENST00000481503	ENSG00000091732	ZC3HC1	0	0.689862	10.0801	0	0.0684379	-3.86906	0.156723	down	no
ENST00000648450	ENSG00000091732	ZC3HC1	11.6731	9.50225	0.469155	9.07771	2.21804	1.14929	0.34882	up	no
ENST00000382708	ENSG00000092010	PSME1	8.70056	0.980761	1.54545	2.3134	2.50887	1.32703	0.358975	up	no
ENST00000561435	ENSG00000092010	PSME1	29.8173	4.99461	7.53476	4.83935	2.81328	1.49225	0.214751	up	no
ENST00000206474	ENSG00000092036	HAUS4	1.82045	3.20642	7.01728	3.94863	0.458408	-1.12529	0.340662	down	no
ENST00000342454	ENSG00000092036	HAUS4	3.43124	1.3217	0.697788	1.54467	2.11952	1.08374	0.43184	up	no
ENST00000554446	ENSG00000092036	HAUS4	1.72211	2.61128	0.468455	0.841624	3.30773	1.72584	0.19367	up	no
ENST00000555986	ENSG00000092036	HAUS4	0.697208	0.829378	1.87689	1.16249	0.502268	-0.993472	0.424433	down	no
ENST00000324103	ENSG00000092098	RNF31	0.951134	1.6467	0.4652	0.629915	2.3722	1.24623	0.350084	up	no
ENST00000399332	ENSG00000092148	HECTD1	8.96153	11.9463	7.24534	7.37673	1.42988	0.515895	0.406924	up	no
ENST00000553700	ENSG00000092148	HECTD1	7.51368	6.28682	10.0469	10.2175	0.681022	-0.554227	0.32219	down	no
ENST00000555843	ENSG00000092148	HECTD1	2.65312	0.2941	0.096009	0.526917	4.73125	2.24222	0.150769	up	no
ENST00000553300	ENSG00000092199	HNRNPC	5.45326	7.59334	2.17776	4.71049	1.89404	0.921463	0.460387	up	no
ENST00000554455	ENSG00000092199	HNRNPC	0.80563	1.01886	0.499404	0.155898	2.7842	1.47726	0.299662	up	no
ENST00000554969	ENSG00000092199	HNRNPC	3.38085	2.37129	0.707377	0.558663	4.54341	2.18377	0.102803	up	no
ENST00000555914	ENSG00000092199	HNRNPC	104.831	122.423	79.8261	87.6485	1.35694	0.440362	0.455194	up	no
ENST00000556513	ENSG00000092199	HNRNPC	0	1.051	2.71773	2.47239	0.202501	-2.304	0.2094	down	no
ENST00000613005	ENSG00000092203	TOX4	0.862088	2.11103	0.590555	0.640896	2.41432	1.27162	0.344139	up	no
ENST00000267415	ENSG00000092330	TINF2	7.706	4.21355	5.04425	1.03292	1.96137	0.971859	0.451957	up	no
ENST00000397138	ENSG00000092531	SNAP23	1.77225	7.18284	12.9252	9.73601	0.395172	-1.33945	0.307591	down	no
ENST00000369407	ENSG00000092621	PHGDH	0.34591	0.381915	0.557096	1.04418	0.454529	-1.13756	0.368927	down	no
ENST00000369409	ENSG00000092621	PHGDH	31.4152	0.250794	0.803808	0	39.395	5.29994	0.0179255	up	yes
ENST00000641023	ENSG00000092621	PHGDH	0.400365	17.4394	20.5735	24.8101	0.393088	-1.34708	0.241293	down	no
ENST00000536128	ENSG00000092841	MYL6	6.84017	5.58965	17.3592	7.43802	0.501259	-0.996372	0.336297	down	no
ENST00000547408	ENSG00000092841	MYL6	12.8573	20.5439	24.9088	30.2088	0.605999	-0.722614	0.431424	down	no
ENST00000549392	ENSG00000092841	MYL6	0	2.09886	10.577	7.33513	0.117175	-3.09326	0.0948311	down	no
ENST00000552297	ENSG00000092841	MYL6	2.70278	2.86663	1.69576	0.814666	2.21851	1.14959	0.419607	up	no
ENST00000674304	ENSG00000092847	AGO1	5.3024	3.62696	6.58962	7.22511	0.646364	-0.62958	0.324289	down	no
ENST00000251195	ENSG00000092853	CLSPN	6.59114	3.7125	4.80639	1.4764	1.63998	0.713676	0.469307	up	no
ENST00000318121	ENSG00000092853	CLSPN	3.17362	4.10864	4.08184	5.98145	0.723647	-0.466643	0.472479	down	no
ENST00000520551	ENSG00000092853	CLSPN	0	0	1.21796	1.02025	-inf	-inf	2.25918e-06	down	yes
ENST00000336509	ENSG00000092931	MFSD11	0.603995	0.340068	0	0.02084	45.3005	5.50146	0.00537134	up	yes
ENST00000454591	ENSG00000093144	ECHDC1	0.493811	2.44573	5.69251	1.1203	0.431472	-1.21266	0.383574	down	no
ENST00000454859	ENSG00000093144	ECHDC1	18.4178	21.1716	12.5668	14.878	1.44251	0.528583	0.458955	up	no
ENST00000336686	ENSG00000093167	LRRFIP2	0.418573	0.142928	0.693612	0.615436	0.428938	-1.22116	0.349985	down	no
ENST00000421276	ENSG00000093167	LRRFIP2	6.22071	2.71642	1.03574	1.57511	3.42307	1.77529	0.156235	up	no
ENST00000273156	ENSG00000093183	SEC22C	1.04773	1.71907	0.736674	0.741885	1.87128	0.904029	0.497845	up	no
ENST00000334136	ENSG00000094631	HDAC6	0	0	1.09575	1.90776	-inf	-inf	1.31699e-06	down	yes
ENST00000486227	ENSG00000094631	HDAC6	0.031832	0.110025	0.592854	0.190464	0.181098	-2.46516	0.0947117	down	no
ENST00000643374	ENSG00000094631	HDAC6	1.13386	0.749419	0	0	inf	inf	3.41472e-06	up	yes
ENST00000644068	ENSG00000094631	HDAC6	1.56009	2.43573	0.651631	0.928896	2.52816	1.33809	0.290648	up	no
ENST00000547238	ENSG00000094914	AAAS	4.01613	4.51363	0.00391	2.84789	2.99101	1.58063	0.377815	up	no
ENST00000547520	ENSG00000094914	AAAS	0.74189	0.738108	0.201103	0.073269	5.39413	2.43139	0.112388	up	no
ENST00000547757	ENSG00000094914	AAAS	0.643152	0.921233	0.624386	0.173533	1.96058	0.971281	0.48081	up	no
ENST00000672797	ENSG00000094914	AAAS	0	0	0.613761	0.639553	-inf	-inf	0.00013353	down	yes
ENST00000375064	ENSG00000095383	TBC1D2	0.445607	0	0.470459	1.71819	0.203599	-2.2962	0.227281	down	no
ENST00000465784	ENSG00000095383	TBC1D2	3.21634	2.56782	2.41379	0.685671	1.86618	0.90009	0.484025	up	no
ENST00000362057	ENSG00000095397	WHRN	0	1.14046	1.21122	1.64928	0.398694	-1.32665	0.47571	down	no
ENST00000674048	ENSG00000095397	WHRN	1.26031	0.257798	0.190356	0.208615	3.80505	1.92792	0.172183	up	no
ENST00000468709	ENSG00000095485	CWF19L1	0.660386	0.609279	0.130534	0.257442	3.27253	1.71041	0.228737	up	no
ENST00000210633	ENSG00000095539	SEMA4G	0.898265	0.373513	1.68766	1.03472	0.467157	-1.09802	0.387502	down	no
ENST00000519649	ENSG00000095539	SEMA4G	0.317383	0.634648	1.51543	1.07261	0.367858	-1.44278	0.261448	down	no
ENST00000337656	ENSG00000095794	CREM	1.11364	0.666724	1.37259	1.86779	0.549429	-0.863995	0.504746	down	no
ENST00000348787	ENSG00000095794	CREM	0.173762	1.63172	0.596646	0.078358	2.67477	1.41942	0.394927	up	no
ENST00000473940	ENSG00000095794	CREM	0.524041	1.95602	0.006044	0.745619	3.29944	1.72222	0.340513	up	no
ENST00000441123	ENSG00000096070	BRPF3	0.019501	0.006634	2.35375	1.01665	0.00775428	-7.01079	4.97648e-05	down	yes
ENST00000637340	ENSG00000096093	EFHC1	1.1144	1.7956	0.807018	0.265525	2.71317	1.43998	0.291239	up	no
ENST00000353801	ENSG00000096384	HSP90AB1	14.7518	6.77456	52.8936	4.61319	0.374328	-1.41762	0.129352	down	no
ENST00000374316	ENSG00000096433	ITPR3	1.28063	4.35066	5.2416	4.90877	0.554787	-0.849994	0.242612	down	no
ENST00000354695	ENSG00000096746	HNRNPH3	22.9256	32.3112	16.8022	20.3634	1.48624	0.571663	0.459867	up	no
ENST00000478698	ENSG00000096746	HNRNPH3	1.28547	1.99116	0.589996	1.095	1.9446	0.959471	0.470943	up	no
ENST00000481819	ENSG00000096746	HNRNPH3	2.48677	2.86116	1.13817	1.16748	2.31949	1.21381	0.337893	up	no
ENST00000491200	ENSG00000096746	HNRNPH3	8.81476	2.20797	0.480492	1.55064	5.42688	2.44012	0.0704195	up	no
ENST00000545482	ENSG00000097021	ACOT7	12.9337	3.17062	3.45263	3.33598	2.37225	1.24626	0.289652	up	no
ENST00000616170	ENSG00000097033	SH3GLB1	0.023143	0.044955	0.620104	0.328683	0.0717737	-3.8004	0.00835316	down	yes
ENST00000369252	ENSG00000099204	ABLIM1	0.270827	0.177849	0.14352	0.005767	3.00546	1.58759	0.331982	up	no
ENST00000369253	ENSG00000099204	ABLIM1	1.10695	1.01866	3.31179	1.02244	0.490426	-1.02789	0.425773	down	no
ENST00000214893	ENSG00000099219	ERMP1	0.419001	0	0	2.49819	0.167722	-2.57586	0.336371	down	no
ENST00000621805	ENSG00000099246	RAB18	1.37592	0.473388	0.19705	0.332765	3.49049	1.80343	0.191442	up	no
ENST00000265371	ENSG00000099250	NRP1	0.69635	0.399318	0	0	inf	inf	5.07725e-06	up	yes
ENST00000374867	ENSG00000099250	NRP1	0	0	1.17739	1.3841	-inf	-inf	6.29185e-07	down	yes
ENST00000611324	ENSG00000099290	WASHC2A	0.145084	0.323803	1.2961	0.107034	0.33417	-1.58134	0.280292	down	no
ENST00000215061	ENSG00000099330	OCEL1	0.111095	0.201111	0.721198	0.776154	0.208505	-2.26184	0.133178	down	no
ENST00000597836	ENSG00000099330	OCEL1	0.838353	1.30179	0.641068	0.153038	2.69504	1.4303	0.343481	up	no
ENST00000397274	ENSG00000099331	MYO9B	0.302152	0.335141	9.6e-05	0	6638.47	12.6966	4.30114e-05	up	yes
ENST00000215071	ENSG00000099341	PSMD8	8.73235	15.5067	6.15955	6.52274	1.91125	0.93452	0.359626	up	no
ENST00000602911	ENSG00000099341	PSMD8	17.9355	44.714	19.4727	20.446	1.56943	0.650239	0.408782	up	no
ENST00000262520	ENSG00000099377	HSD3B7	0.498345	0.695325	1.39755	1.01327	0.495129	-1.01412	0.415315	down	no
ENST00000587896	ENSG00000099622	CIRBP	4.99642	3.07864	1.9221	2.89128	1.67763	0.746424	0.500437	up	no
ENST00000589235	ENSG00000099622	CIRBP	1.20652	0.304412	1.78691	2.2888	0.370717	-1.43161	0.281603	down	no
ENST00000591659	ENSG00000099622	CIRBP	2.51512	2.3573	0.222723	0.036404	18.8032	4.23291	0.0121632	up	yes
ENST00000593093	ENSG00000099622	CIRBP	0.64549	0.630021	0.296856	0.1357	2.94878	1.56012	0.239725	up	no
ENST00000590265	ENSG00000099624	ATP5F1D	1.18321	1.54689	1.81916	3.04064	0.561771	-0.831946	0.504128	down	no
ENST00000592624	ENSG00000099624	ATP5F1D	0.656912	1.1456	0.237485	0.555349	2.27351	1.18492	0.399432	up	no
ENST00000650044	ENSG00000099625	CBARP	0.551503	0.516193	0	0.391261	2.72886	1.4483	0.434474	up	no
ENST00000597270	ENSG00000099783	HNRNPM	5.55515	6.30368	23.9324	23.5386	0.249812	-2.00108	0.0304356	down	yes
ENST00000600092	ENSG00000099783	HNRNPM	6.51872	7.39397	0	0	inf	inf	5.59172e-07	up	yes
ENST00000600806	ENSG00000099783	HNRNPM	0	0	1.88171	1.18504	-inf	-inf	3.77024e-06	down	yes
ENST00000620401	ENSG00000099783	HNRNPM	18.2547	11.8486	1.07534	1.16166	13.457	3.75028	0.000113871	up	yes
ENST00000597607	ENSG00000099797	TECR	4.63359	1.36885	13.0569	3.84864	0.355057	-1.49388	0.246408	down	no
ENST00000606065	ENSG00000099804	CDC34	0.76003	0	2.93349	1.01336	0.192566	-2.37657	0.19272	down	no
ENST00000453495	ENSG00000099814	CEP170B	1.75578	0.102947	2.51439	3.43379	0.312487	-1.67813	0.179765	down	no
ENST00000556508	ENSG00000099814	CEP170B	3.52441	3.93426	0	0	inf	inf	1.31203e-11	up	yes
ENST00000612655	ENSG00000099817	POLR2E	0.924637	7.69556	0.11148	2.22921	3.68276	1.88079	0.253305	up	no
ENST00000591601	ENSG00000099875	MKNK2	22.9011	23.1448	6.86249	24.3606	1.47474	0.560463	0.442422	up	no
ENST00000406522	ENSG00000099889	ARVCF	0.33047	0.427645	0.242986	0	3.11999	1.64154	0.399358	up	no
ENST00000252136	ENSG00000099899	TRMT2A	5.03028	6.92579	4.89365	0.562583	2.19127	1.13177	0.35522	up	no
ENST00000403707	ENSG00000099899	TRMT2A	0.327485	0.737942	1.26215	1.5776	0.375183	-1.41433	0.275689	down	no
ENST00000406969	ENSG00000099917	MED15	0	1.19356	0	0.268555	4.44438	2.15198	0.411619	up	no
ENST00000644036	ENSG00000099956	SMARCB1	11.2302	3.77895	12.5582	10.0256	0.6646	-0.589443	0.392089	down	no
ENST00000337612	ENSG00000099968	BCL2L13	1.17135	0.196449	0.513978	0	2.6612	1.41208	0.481426	up	no
ENST00000618481	ENSG00000099968	BCL2L13	0.367001	1.67558	0	0	inf	inf	6.04035e-06	up	yes
ENST00000263119	ENSG00000099991	CABIN1	6.00425	1.5264	0	2.83689	2.65455	1.40846	0.444458	up	no
ENST00000405822	ENSG00000099991	CABIN1	0.372755	0.015082	0.041587	0.92299	0.40208	-1.31445	0.448517	down	no
ENST00000462073	ENSG00000099992	TBC1D10A	0.119442	0.07569	0.236308	0.304489	0.360823	-1.47064	0.275355	down	no
ENST00000314328	ENSG00000100014	SPECC1L	9.2548	4.07579	4.84533	3.73415	1.55378	0.635779	0.401521	up	no
ENST00000437398	ENSG00000100014	SPECC1L	2.94564	1.58315	6.04453	5.01151	0.409622	-1.28764	0.101855	down	no
ENST00000335025	ENSG00000100023	PPIL2	0.188195	3.53791	1.8481	4.87471	0.554248	-0.851396	0.491104	down	no
ENST00000398831	ENSG00000100023	PPIL2	1.96685	1.15822	7.72224	2.83641	0.295973	-1.75646	0.0898965	down	no
ENST00000406385	ENSG00000100023	PPIL2	9.53698	6.34462	0.512244	2.12467	6.0228	2.59043	0.0140432	up	yes
ENST00000417788	ENSG00000100023	PPIL2	1.51012	0.279899	0.234754	0.649288	2.02481	1.01779	0.481957	up	no
ENST00000398793	ENSG00000100038	TOP3B	0.18683	0.519035	0.197283	2.29536	0.283179	-1.82021	0.224984	down	no
ENST00000457270	ENSG00000100038	TOP3B	3.05265	4.04229	0.389306	3.35012	1.89733	0.923974	0.489691	up	no
ENST00000252137	ENSG00000100056	ESS2	1.98317	1.565	2.7756	3.47682	0.567487	-0.817341	0.395486	down	no
ENST00000472073	ENSG00000100056	ESS2	3.65258	5.05057	1.92155	1.19091	2.79623	1.48348	0.238158	up	no
ENST00000403299	ENSG00000100065	CARD10	0.810629	1.81846	0	1.0261	2.56221	1.35739	0.490969	up	no
ENST00000470922	ENSG00000100075	SLC25A1	6.72989	0.848646	0	0	inf	inf	7.92644e-06	up	yes
ENST00000475445	ENSG00000100083	GGA1	0.423289	0.837324	0.285677	0.352884	1.97415	0.981229	0.459748	up	no
ENST00000469947	ENSG00000100092	SH3BP1	0.67936	0.457907	0.13383	0.41079	2.08818	1.06225	0.45225	up	no
ENST00000398145	ENSG00000100099	HPS4	3.18829	2.33825	1.41179	1.75827	1.74335	0.801866	0.461034	up	no
ENST00000405938	ENSG00000100109	TFIP11	6.71302	4.26033	2.08263	2.34625	2.47768	1.30899	0.226764	up	no
ENST00000407431	ENSG00000100109	TFIP11	6.05241	1.89231	9.16627	7.80499	0.468128	-1.09502	0.241934	down	no
ENST00000407690	ENSG00000100109	TFIP11	2.18613	8.01117	1.97298	3.89461	1.7379	0.797346	0.471311	up	no
ENST00000498417	ENSG00000100124	ANKRD54	0.292729	0.45177	0.424193	1.06691	0.499295	-1.00204	0.426029	down	no
ENST00000406934	ENSG00000100129	EIF3L	99.0107	69.3607	112.587	107.687	0.764375	-0.387648	0.453902	down	no
ENST00000412331	ENSG00000100129	EIF3L	9.67094	1.52998	18.4063	25.9187	0.2527	-1.9845	0.0206136	down	yes
ENST00000436452	ENSG00000100129	EIF3L	4.55493	3.81873	10.767	6.44186	0.486591	-1.03922	0.404127	down	no
ENST00000624234	ENSG00000100129	EIF3L	14.3947	103.278	4.79744	14.13	6.21706	2.63623	0.00429295	up	yes
ENST00000470701	ENSG00000100142	POLR2F	7.91174	2.85579	0	0.18242	59.026	5.88328	0.00197246	up	yes
ENST00000400249	ENSG00000100150	DEPDC5	3.07135	1.73196	1.28484	1.28046	1.87242	0.904902	0.423823	up	no
ENST00000642696	ENSG00000100150	DEPDC5	0.2027	1.32816	1.29503	1.75129	0.502526	-0.992728	0.423968	down	no
ENST00000397906	ENSG00000100154	TTC28	1.21192	1.15626	0	0.007143	331.539	8.37303	6.67257e-06	up	yes
ENST00000612946	ENSG00000100154	TTC28	0	0	1.0719	1.06475	-inf	-inf	4.12806e-08	down	yes
ENST00000431312	ENSG00000100201	DDX17	1.3336	1.4168	0.633002	0.23501	3.16862	1.66385	0.217648	up	no
ENST00000216029	ENSG00000100211	CBY1	4.57492	3.92556	6.16683	9.48075	0.543245	-0.880324	0.444227	down	no
ENST00000396811	ENSG00000100211	CBY1	0.768787	0.442489	0.664996	1.69348	0.513585	-0.961324	0.473662	down	no
ENST00000619293	ENSG00000100211	CBY1	10.3208	8.69592	3.74791	2.31844	3.13479	1.64837	0.180318	up	no
ENST00000344347	ENSG00000100219	XBP1	1.34014	0	6.94829	1.44175	0.15973	-2.6463	0.175124	down	no
ENST00000403532	ENSG00000100219	XBP1	0.709275	0	3.93159	2.30174	0.113788	-3.13559	0.0985121	down	no
ENST00000484256	ENSG00000100219	XBP1	1.32596	0.970117	2.48452	2.7779	0.436316	-1.19655	0.334168	down	no
ENST00000266087	ENSG00000100225	FBXO7	44.0184	22.6465	18.8259	14.7667	1.98451	0.988783	0.151349	up	no
ENST00000397426	ENSG00000100225	FBXO7	0	27.655	30.2351	37.4643	0.408497	-1.2916	0.441539	down	no
ENST00000216061	ENSG00000100239	PPP6R2	0.377656	0.415009	4.48988	0.512221	0.158466	-2.65775	0.064093	down	no
ENST00000395741	ENSG00000100239	PPP6R2	0.423102	0	3.81706	1.10863	0.085897	-3.54125	0.0694635	down	no
ENST00000401672	ENSG00000100239	PPP6R2	0.145763	1.29476	0.397512	0.145337	2.65364	1.40797	0.377354	up	no
ENST00000380817	ENSG00000100241	SBF1	3.8511	3.41294	5.00289	7.3851	0.586377	-0.770098	0.241496	down	no
ENST00000405018	ENSG00000100242	SUN2	4.9e-05	3.32874	3.63475	3.72208	0.452476	-1.14409	0.487598	down	no
ENST00000337959	ENSG00000100266	PACSIN2	0.205633	0.277114	0.506871	0.456456	0.501125	-0.996758	0.447425	down	no
ENST00000479003	ENSG00000100288	CHKB	2.25839	1.67754	0.213923	1.09206	3.01378	1.59158	0.262997	up	no
ENST00000216117	ENSG00000100292	HMOX1	31.4826	32.3668	42.3496	41.1053	0.765077	-0.386323	0.499178	down	no
ENST00000397871	ENSG00000100296	THOC5	0	0	0.328198	0.472328	-inf	-inf	0.000269344	down	yes
ENST00000396265	ENSG00000100300	TSPO	2.76735	3.20496	5.95268	7.01512	0.460549	-1.11857	0.353123	down	no
ENST00000401609	ENSG00000100316	RPL3	1.17924	22.7301	0.764537	61.6302	0.383195	-1.38385	0.340303	down	no
ENST00000402527	ENSG00000100316	RPL3	1.14663	7.30554	1.84128	1.07565	2.89763	1.53487	0.288904	up	no
ENST00000460589	ENSG00000100316	RPL3	3.64897	7.50237	1.97473	2.27439	2.62439	1.39198	0.301643	up	no
ENST00000491982	ENSG00000100320	RBFOX2	0.526662	0.441464	0.798953	1.05998	0.520797	-0.941206	0.492425	down	no
ENST00000323630	ENSG00000100330	MTMR3	0.729496	0.702868	0	0	inf	inf	2.92586e-06	up	yes
ENST00000351488	ENSG00000100330	MTMR3	0.492233	0.411174	0.158463	0.317376	1.89856	0.924903	0.48365	up	no
ENST00000433117	ENSG00000100335	MIEF1	0.687184	1.41929	3.84244	2.83345	0.315535	-1.66413	0.147505	down	no
ENST00000416967	ENSG00000100348	TXN2	18.6007	20.8067	13.2206	8.7659	1.79235	0.84185	0.354978	up	no
ENST00000487725	ENSG00000100348	TXN2	0	0	2.10084	3.99981	-inf	-inf	2.86016e-05	down	yes
ENST00000216187	ENSG00000100350	FOXRED2	4.04437	0.070283	1.07797	0.086791	3.53262	1.82074	0.306207	up	no
ENST00000446273	ENSG00000100354	TNRC6B	0.156325	0.238651	0.440212	0.290943	0.540208	-0.888412	0.465738	down	no
ENST00000454349	ENSG00000100354	TNRC6B	1.79477	1.15799	0.493	0.483636	3.02339	1.59617	0.088759	up	no
ENST00000402844	ENSG00000100372	SLC25A17	0.360026	0.119097	0.896122	0.138971	0.462879	-1.11129	0.450536	down	no
ENST00000456470	ENSG00000100379	KCTD17	2.09003	2.47646	1.33859	0.965631	1.9818	0.986812	0.461001	up	no
ENST00000455915	ENSG00000100401	RANGAP1	17.7117	9.2408	8.65242	6.01029	1.83817	0.878267	0.219525	up	no
ENST00000381019	ENSG00000100416	TRMU	0.407223	1.53842	3.14731	2.65264	0.335459	-1.57579	0.236817	down	no
ENST00000381021	ENSG00000100416	TRMU	2.14319	1.3525	0.570039	0.649109	2.86733	1.51971	0.25334	up	no
ENST00000485559	ENSG00000100416	TRMU	1.11541	2.01125	0.727327	0.734516	2.13885	1.09683	0.41243	up	no
ENST00000645190	ENSG00000100416	TRMU	8.94219	5.78104	4.54878	1.14403	2.58628	1.37088	0.273193	up	no
ENST00000472620	ENSG00000100417	PMM1	0.818504	0.908244	0.53241	0.041861	3.00685	1.58825	0.321968	up	no
ENST00000404034	ENSG00000100425	BRD1	2.73611	5.13964	3.89353	0.192555	1.92746	0.946698	0.481926	up	no
ENST00000404760	ENSG00000100425	BRD1	0	0.277875	1.93317	0	0.143741	-2.79846	0.285956	down	no
ENST00000556255	ENSG00000100441	KHNYN	1.57176	1.95099	0.580059	1.05815	2.15037	1.10458	0.412301	up	no
ENST00000544691	ENSG00000100445	SDR39U1	1.08935	0.630962	0.518933	0.219492	2.32971	1.22015	0.394744	up	no
ENST00000359890	ENSG00000100461	RBM23	3.5832	3.17643	4.9497	4.95749	0.682296	-0.55153	0.378599	down	no
ENST00000399922	ENSG00000100461	RBM23	12.1812	8.07154	6.51143	4.49294	1.84042	0.880038	0.343178	up	no
ENST00000216350	ENSG00000100462	PRMT5	1.97102	1.85375	4.60158	10.2554	0.257439	-1.9577	0.0747638	down	no
ENST00000324366	ENSG00000100462	PRMT5	52.0836	63.5413	45.2832	33.3344	1.47072	0.556526	0.359159	up	no
ENST00000397441	ENSG00000100462	PRMT5	12.5424	1.30462	8.88865	20.4943	0.471259	-1.08541	0.282547	down	no
ENST00000553897	ENSG00000100462	PRMT5	1.81139	1.18904	7.91834	7.01143	0.200969	-2.31495	0.0480806	down	yes
ENST00000556043	ENSG00000100462	PRMT5	8.53507	5.29308	3.44543	3.07636	2.1203	1.08427	0.418082	up	no
ENST00000554396	ENSG00000100479	POLE2	0.149884	0.645881	0.104931	5.68501	0.137439	-2.86313	0.105889	down	no
ENST00000484763	ENSG00000100483	VCPKMT	1.06546	0	0.904766	2.0638	0.358914	-1.47829	0.424323	down	no
ENST00000569518	ENSG00000100483	VCPKMT	0.864491	0.768259	0.336724	0.184529	3.13236	1.64725	0.241426	up	no
ENST00000324330	ENSG00000100503	NIN	4.52994	0.841436	4.37631	4.29066	0.619752	-0.690236	0.502719	down	no
ENST00000530997	ENSG00000100503	NIN	0.663268	3.2842	0.001654	0.002054	1064.58	10.0561	7.18321e-08	up	yes
ENST00000673657	ENSG00000100503	NIN	5.81284	0.755866	6.2338	5.31296	0.568879	-0.813807	0.350262	down	no
ENST00000674030	ENSG00000100503	NIN	0	0.144976	0	0.559223	0.259245	-1.94761	0.435262	down	no
ENST00000445930	ENSG00000100519	PSMC6	27.1694	24.3482	2.25881	23.2029	2.02334	1.01674	0.280042	up	no
ENST00000612399	ENSG00000100519	PSMC6	4.02937	17.3055	40.0365	9.19452	0.433363	-1.20635	0.195836	down	no
ENST00000335183	ENSG00000100526	CDKN3	17.6633	27.6725	13.7524	10.6711	1.85623	0.892379	0.378818	up	no
ENST00000555837	ENSG00000100526	CDKN3	1.98501	1.12223	11.2732	1.66168	0.240222	-2.05756	0.154229	down	no
ENST00000556102	ENSG00000100526	CDKN3	0.299575	1.33923	0.122101	7.64739	0.210929	-2.24517	0.194462	down	no
ENST00000395573	ENSG00000100528	CNIH1	1.51261	0.368676	1.59686	1.87432	0.541972	-0.88371	0.500246	down	no
ENST00000554087	ENSG00000100554	ATP6V1D	4.7895	2.56817	0.640949	0	11.4794	3.52097	0.0686568	up	no
ENST00000554812	ENSG00000100567	PSMA3	1.84477	2.3009	0.690803	1.30516	2.07702	1.05452	0.424969	up	no
ENST00000216463	ENSG00000100575	TIMM9	1.0142	0.818564	4.40224	3.81242	0.223109	-2.16418	0.10243	down	no
ENST00000395159	ENSG00000100575	TIMM9	10.9099	10.6351	4.26803	7.20423	1.87801	0.909207	0.415012	up	no
ENST00000556007	ENSG00000100575	TIMM9	0.935059	0.984808	2.29446	2.60188	0.392103	-1.3507	0.278367	down	no
ENST00000555093	ENSG00000100577	GSTZ1	0.094109	0.147671	0.469234	0.081824	0.438756	-1.18851	0.399626	down	no
ENST00000261244	ENSG00000100578	KIAA0586	0.546507	0.827931	0.227048	0.299539	2.61009	1.3841	0.294335	up	no
ENST00000535854	ENSG00000100591	AHSA1	11.2707	17.9978	3.0388	5.70542	3.34718	1.74295	0.115734	up	no
ENST00000553374	ENSG00000100591	AHSA1	3.88086	8.36941	3.25471	0.698236	3.09902	1.63181	0.258724	up	no
ENST00000556369	ENSG00000100591	AHSA1	1.40358	1.64578	0.770307	0.74214	2.01617	1.01162	0.470167	up	no
ENST00000555589	ENSG00000100599	RIN3	0.469852	0.42767	0.185413	0	4.84066	2.2752	0.23357	up	no
ENST00000394366	ENSG00000100650	SRSF5	0.936315	6.72694	3.87011	11.5893	0.495703	-1.01245	0.411618	down	no
ENST00000554465	ENSG00000100650	SRSF5	12.6624	7.99784	10.4916	19.1489	0.697028	-0.520712	0.442717	down	no
ENST00000556184	ENSG00000100650	SRSF5	5.30341	6.55825	4.06869	2.89733	1.70279	0.767901	0.47988	up	no
ENST00000557154	ENSG00000100650	SRSF5	50.5319	41.9225	46.3329	12.9972	1.5583	0.639977	0.402543	up	no
ENST00000555709	ENSG00000100714	MTHFD1	0.428129	0.744994	0.218246	0.324947	2.15968	1.11082	0.441685	up	no
ENST00000557370	ENSG00000100714	MTHFD1	3.53999	10.7009	0.31117	1.08738	10.1826	3.34804	0.00653074	up	yes
ENST00000555755	ENSG00000100722	ZC3H14	0	0	0.408876	0.726876	-inf	-inf	0.0001237	down	yes
ENST00000262710	ENSG00000100813	ACIN1	7.06021	4.63398	3.02917	3.06609	1.91857	0.940032	0.274604	up	no
ENST00000473758	ENSG00000100813	ACIN1	8.43258	8.59877	9.57676	14.8924	0.696034	-0.522771	0.425158	down	no
ENST00000555053	ENSG00000100813	ACIN1	1.29249	4.5321	1.50604	0.980669	2.34229	1.22792	0.319891	up	no
ENST00000557515	ENSG00000100813	ACIN1	2.29902	3.63704	8.36458	1.59499	0.596016	-0.746578	0.496836	down	no
ENST00000358932	ENSG00000100814	CCNB1IP1	30.5477	47.7467	23.4959	26.1204	1.578	0.658095	0.338807	up	no
ENST00000398160	ENSG00000100814	CCNB1IP1	11.2294	0	18.7434	8.40739	0.413593	-1.27372	0.474852	down	no
ENST00000437553	ENSG00000100814	CCNB1IP1	0	0.183875	2.04688	7.06457	0.0201807	-5.63088	0.00424295	down	yes
ENST00000555414	ENSG00000100823	APEX1	2.90849	1.5552	14.4524	2.58627	0.261974	-1.93251	0.133136	down	no
ENST00000556821	ENSG00000100836	PABPN1	9.53469	3.13206	2.08662	4.32912	1.97432	0.981359	0.452895	up	no
ENST00000557702	ENSG00000100836	PABPN1	1.18989	1.33044	6.48746	1.28715	0.324174	-1.62516	0.231898	down	no
ENST00000432921	ENSG00000100852	ARHGAP5	0	1.56671	0.364846	0	4.29417	2.10238	0.433614	up	no
ENST00000216756	ENSG00000100865	CINP	3.86927	5.55766	0.375711	2.1113	3.79047	1.92237	0.182651	up	no
ENST00000250383	ENSG00000100867	DHRS2	0.326502	0	0.568885	0.892363	0.223441	-2.16204	0.248209	down	no
ENST00000546080	ENSG00000100883	SRP54	1.06051	0	0	4.07428	0.260294	-1.94178	0.460303	down	no
ENST00000430710	ENSG00000100888	CHD8	1.98517	1.9975	0.415432	0.343516	5.24762	2.39166	0.0433433	up	yes
ENST00000555935	ENSG00000100888	CHD8	0.137486	0.210186	2.03441	0.312159	0.148162	-2.75476	0.0573823	down	no
ENST00000645929	ENSG00000100888	CHD8	4.96705	2.1961	5.86341	6.01335	0.603123	-0.729475	0.300979	down	no
ENST00000396973	ENSG00000100889	PCK2	0.89525	0.578482	0.175927	0.436772	2.40531	1.26622	0.371846	up	no
ENST00000545054	ENSG00000100889	PCK2	0.396408	0.88349	0	0	inf	inf	9.83903e-05	up	yes
ENST00000558096	ENSG00000100889	PCK2	0.607374	0.945058	0.544985	0.182995	2.13252	1.09256	0.426736	up	no
ENST00000250377	ENSG00000100890	PRORP	5.03175	3.57111	2.20785	2.09306	2.00024	1.00018	0.264441	up	no
ENST00000396936	ENSG00000100897	DCAF11	0.179985	0.01567	1.4289	0.609392	0.0959897	-3.38098	0.0300077	down	yes
ENST00000396941	ENSG00000100897	DCAF11	0	0	2.98519	4.44197	-inf	-inf	2.97342e-07	down	yes
ENST00000446197	ENSG00000100897	DCAF11	1.65412	5.73347	0.848198	2.72996	2.06464	1.04589	0.373959	up	no
ENST00000559144	ENSG00000100897	DCAF11	0.727005	0.123664	2.16763	0.814204	0.285284	-1.80953	0.229197	down	no
ENST00000261479	ENSG00000100902	PSMA6	3.92002	20.0603	3.28687	48.458	0.463433	-1.10957	0.348616	down	no
ENST00000540871	ENSG00000100902	PSMA6	8.24511	2.27958	0	0	inf	inf	5.08074e-06	up	yes
ENST00000553809	ENSG00000100902	PSMA6	45.2598	17.0037	26.9334	0.053047	2.30722	1.20615	0.449396	up	no
ENST00000554843	ENSG00000100902	PSMA6	1.31931	1.80116	11.4101	0.671639	0.258279	-1.953	0.200081	down	no
ENST00000622405	ENSG00000100902	PSMA6	17.69	15.9329	3.12224	7.3563	3.20873	1.682	0.134134	up	no
ENST00000627895	ENSG00000100902	PSMA6	5.67958	3.65212	0.803569	2.33285	2.97527	1.57302	0.238416	up	no
ENST00000216799	ENSG00000100908	EMC9	3.19298	2.16508	0.143189	1.40544	3.45987	1.79072	0.222696	up	no
ENST00000558273	ENSG00000100911	PSME2	6.94554	7.97467	13.3607	10.6172	0.62225	-0.684435	0.457351	down	no
ENST00000560410	ENSG00000100911	PSME2	16.1306	17.909	6.53198	8.72466	2.23114	1.15778	0.31013	up	no
ENST00000355299	ENSG00000100938	GMPR2	5.66252	1.45824	1.68179	1.5048	2.23461	1.16002	0.383246	up	no
ENST00000420554	ENSG00000100938	GMPR2	0.341851	4.7896	0.226968	0.922196	4.46538	2.15878	0.178329	up	no
ENST00000216840	ENSG00000100949	RABGGTA	5.14984	1.67435	2.15645	0.278386	2.80273	1.48683	0.308395	up	no
ENST00000399409	ENSG00000100949	RABGGTA	1.06534	3.9018	3.87098	6.39117	0.484025	-1.04685	0.365295	down	no
ENST00000376542	ENSG00000100997	ABHD12	2.44317	1.60487	3.20204	4.08987	0.555141	-0.849073	0.488213	down	no
ENST00000374380	ENSG00000101019	UQCC1	3.22897	2.12758	0	0	inf	inf	1.72788e-06	up	yes
ENST00000472559	ENSG00000101019	UQCC1	1.47502	0.214658	3.07588	1.02893	0.411633	-1.28057	0.372755	down	no
ENST00000360911	ENSG00000101040	ZMYND8	1.86616	5.25594	0.829539	0.679534	4.71952	2.23864	0.0536888	up	no
ENST00000461685	ENSG00000101040	ZMYND8	0.209714	0.213934	1.64668	1.41168	0.138521	-2.85182	0.0344242	down	yes
ENST00000471951	ENSG00000101040	ZMYND8	2.41096	1.53535	4.64975	3.84878	0.464351	-1.10671	0.26607	down	no
ENST00000536340	ENSG00000101040	ZMYND8	0	0.320429	0	1.09234	0.29334	-1.76935	0.482298	down	no
ENST00000611941	ENSG00000101040	ZMYND8	0	0	0.235031	4.27323	-inf	-inf	2.96298e-06	down	yes
ENST00000373030	ENSG00000101052	IFT52	8.99704	0.079482	10.1422	9.07051	0.472423	-1.08185	0.456337	down	no
ENST00000373039	ENSG00000101052	IFT52	3.16041	11.7989	3.23716	3.20163	2.32331	1.21618	0.325645	up	no
ENST00000344795	ENSG00000101084	RAB5IF	32.522	35.1185	15.2236	25.3509	1.66707	0.737314	0.34888	up	no
ENST00000483815	ENSG00000101084	RAB5IF	4.6636	4.65221	14.7973	6.8578	0.430189	-1.21696	0.271697	down	no
ENST00000487587	ENSG00000101109	STK4	0	0.497605	0.521936	0.810511	0.373452	-1.42101	0.435425	down	no
ENST00000396029	ENSG00000101126	ADNP	12.7056	9.05845	11.6063	18.2625	0.728654	-0.456693	0.426785	down	no
ENST00000673732	ENSG00000101126	ADNP	1.10698	1.72864	0.065758	0.056057	23.2781	4.5409	0.00170514	up	yes
ENST00000415828	ENSG00000101138	CSTF1	9.96517	5.2006	1.08066	6.14042	2.10021	1.07053	0.419116	up	no
ENST00000452950	ENSG00000101138	CSTF1	0	0.676276	0.082385	1.84087	0.351631	-1.50787	0.467091	down	no
ENST00000460601	ENSG00000101158	NELFCD	0.274126	0.443752	2.2111	9.31543	0.0622805	-4.00508	0.00459194	down	yes
ENST00000474543	ENSG00000101158	NELFCD	0.103942	0.093384	2.40677	2.00315	0.044746	-4.4821	0.00257893	down	yes
ENST00000477741	ENSG00000101158	NELFCD	1.43087	1.53367	4.28677	2.34204	0.447221	-1.16094	0.34235	down	no
ENST00000602795	ENSG00000101158	NELFCD	0.607085	1.20848	6.36965	12.4133	0.0966604	-3.37093	0.00308636	down	yes
ENST00000652272	ENSG00000101158	NELFCD	44.5325	43.7268	35.8829	21.6605	1.53379	0.617098	0.33277	up	no
ENST00000395343	ENSG00000101191	DIDO1	2.00496	2.31724	0	1.20509	3.58662	1.84262	0.318649	up	no
ENST00000266068	ENSG00000101216	GMEB2	1.50296	3.10929	0.650516	0.771133	3.2443	1.69791	0.174051	up	no
ENST00000370077	ENSG00000101216	GMEB2	1.88032	0	3.05848	3.00786	0.309959	-1.68985	0.361207	down	no
ENST00000217195	ENSG00000101220	C20orf27	1.46486	2.35158	0.099017	1.57923	2.27407	1.18527	0.43665	up	no
ENST00000358395	ENSG00000101236	RNF24	2.64353	0	2.94764	3.20695	0.429521	-1.2192	0.48887	down	no
ENST00000432261	ENSG00000101236	RNF24	1.78173	1.95451	0.160767	0.715431	4.26416	2.09226	0.136461	up	no
ENST00000217244	ENSG00000101266	CSNK2A1	1.71266	3.81363	3.09346	4.95914	0.686274	-0.543143	0.411236	down	no
ENST00000643700	ENSG00000101266	CSNK2A1	0	3.82505	7.28966	13.9546	0.180051	-2.47352	0.147224	down	no
ENST00000643980	ENSG00000101266	CSNK2A1	0	0.316994	0.335645	0.461996	0.397414	-1.33128	0.457653	down	no
ENST00000645334	ENSG00000101266	CSNK2A1	0.134701	11.1813	0.603044	1.61485	5.10213	2.3511	0.162935	up	no
ENST00000646561	ENSG00000101266	CSNK2A1	1.26935	6.62506	1.08153	2.14201	2.44899	1.29219	0.145957	up	no
ENST00000647155	ENSG00000101266	CSNK2A1	0.603625	1.05741	0.900685	4.35504	0.316043	-1.66181	0.199736	down	no
ENST00000377465	ENSG00000101310	SEC23B	1.3169	4.97305	1.13177	0	5.5576	2.47446	0.21288	up	no
ENST00000650089	ENSG00000101310	SEC23B	5.68862	3.69525	8.03776	6.15926	0.660974	-0.597334	0.490472	down	no
ENST00000378501	ENSG00000101333	PLCB4	2.18704	0.201978	2.04776	2.53435	0.52138	-0.939594	0.447229	down	no
ENST00000492632	ENSG00000101333	PLCB4	0.120883	1.34001	0.218667	0	6.68093	2.74005	0.18353	up	no
ENST00000279022	ENSG00000101335	MYL9	7.27179	3.43176	2.6383	3.26065	1.81448	0.85956	0.431427	up	no
ENST00000346786	ENSG00000101335	MYL9	1.82037	8.40533	11.6357	13.1293	0.412909	-1.2761	0.274525	down	no
ENST00000495749	ENSG00000101337	TM9SF4	0.19452	0.140851	1.94252	0.544983	0.134822	-2.89087	0.0420856	down	yes
ENST00000643918	ENSG00000101347	SAMHD1	0.10049	0.807177	1.32003	1.34938	0.340026	-1.55628	0.269098	down	no
ENST00000462630	ENSG00000101361	NOP56	1.88422	0.577288	2.007	2.54594	0.540642	-0.887255	0.494214	down	no
ENST00000480447	ENSG00000101361	NOP56	1.66625	1.57972	1.96641	4.33161	0.515396	-0.956246	0.445144	down	no
ENST00000397151	ENSG00000101363	MANBAL	0.171696	4.67653	0.465089	0.992739	3.32565	1.73364	0.28533	up	no
ENST00000613370	ENSG00000101365	IDH3B	1.22717	0.44453	3.87429	0.513255	0.38101	-1.3921	0.330478	down	no
ENST00000339269	ENSG00000101391	CDK5RAP1	0.501557	4.58416	0	0	inf	inf	1.55524e-05	up	yes
ENST00000449821	ENSG00000101407	TTI1	0.977761	0.953265	0.119894	0.145125	7.28637	2.8652	0.0370159	up	yes
ENST00000462548	ENSG00000101413	RPRD1B	0.487135	0.436624	0.479853	1.27862	0.525318	-0.928737	0.468144	down	no
ENST00000480653	ENSG00000101444	AHCY	7.86659	5.29067	1.87873	5.35795	1.81814	0.86246	0.442031	up	no
ENST00000456939	ENSG00000101457	DNTTIP1	0.872086	4.8808	0.371468	0.670771	5.51974	2.4646	0.0921885	up	no
ENST00000217455	ENSG00000101473	ACOT8	2.48288	0.750272	0.074901	0.759258	3.87594	1.95455	0.205625	up	no
ENST00000461272	ENSG00000101473	ACOT8	0.992507	1.30262	3.18416	2.05732	0.437878	-1.1914	0.347244	down	no
ENST00000325971	ENSG00000101639	CEP192	2.53086	2.41382	2.02863	0.727442	1.79411	0.843266	0.420084	up	no
ENST00000506447	ENSG00000101639	CEP192	2.48736	3.90599	4.4904	6.38929	0.58764	-0.766996	0.263012	down	no
ENST00000511820	ENSG00000101639	CEP192	2.492	1.22928	0.890575	0.386997	2.91277	1.54239	0.208833	up	no
ENST00000262158	ENSG00000101665	SMAD7	0.120703	0.276389	0.390979	0.343946	0.540316	-0.888124	0.47772	down	no
ENST00000327155	ENSG00000101773	RBBP8	6.10956	10.6248	9.47535	14.5786	0.6957	-0.523463	0.446048	down	no
ENST00000399721	ENSG00000101773	RBBP8	0.064098	1.37058	0.500023	0.147074	2.2171	1.14867	0.497147	up	no
ENST00000399722	ENSG00000101773	RBBP8	10.9197	6.914	6.89725	1.49618	2.12472	1.08727	0.270074	up	no
ENST00000399725	ENSG00000101773	RBBP8	0.262206	0.155929	0.457474	0.393638	0.491281	-1.02538	0.439524	down	no
ENST00000361815	ENSG00000101843	PSMD10	2.5428	1.6251	0.641023	1.44098	2.00187	1.00135	0.459401	up	no
ENST00000407597	ENSG00000101849	TBL1X	2.17922	3.56385	0	1.88337	3.04935	1.6085	0.391466	up	no
ENST00000535419	ENSG00000101856	PGRMC1	0.044545	0.942511	2.70397	30.2117	0.0299875	-5.0595	0.00153459	down	yes
ENST00000251943	ENSG00000101901	ALG13	0	0	1.84225	1.04461	-inf	-inf	1.63748e-06	down	yes
ENST00000355640	ENSG00000101966	XIAP	1.4077	1.33075	0.007272	0.678028	3.99598	1.99855	0.219175	up	no
ENST00000371199	ENSG00000101966	XIAP	2.75225	0.948194	3.26637	3.20106	0.572166	-0.805495	0.34839	down	no
ENST00000370009	ENSG00000102030	NAA10	1.50641	2.19945	0.815326	0.891501	2.1712	1.11849	0.423355	up	no
ENST00000460996	ENSG00000102030	NAA10	3.71204	5.23433	12.6893	7.73892	0.437941	-1.19119	0.310112	down	no
ENST00000335997	ENSG00000102034	ELF4	0.177758	0.007493	0.572626	0.328307	0.205621	-2.28194	0.156704	down	no
ENST00000380084	ENSG00000102054	RBBP7	8.89411	0.688334	1.18526	0	8.08469	3.01519	0.148847	up	no
ENST00000380087	ENSG00000102054	RBBP7	8.58261	26.3912	45.9377	21.494	0.518656	-0.947151	0.177896	down	no
ENST00000404022	ENSG00000102054	RBBP7	37.4168	25.8958	2.81957	31.5335	1.843	0.882053	0.351239	up	no
ENST00000218197	ENSG00000102078	SLC25A14	0.926877	1.99107	0	0.322121	9.05854	3.17928	0.0810172	up	no
ENST00000370470	ENSG00000102081	FMR1	1.20739	0.699346	1.65585	1.80474	0.550986	-0.859912	0.493952	down	no
ENST00000376563	ENSG00000102103	PQBP1	7.46633	4.94339	18.1487	16.6312	0.356808	-1.48678	0.141639	down	no
ENST00000447146	ENSG00000102103	PQBP1	5.22834	9.60919	3.51692	3.28568	2.18116	1.12509	0.380318	up	no
ENST00000477997	ENSG00000102103	PQBP1	6.11642	3.61793	1.95875	1.3902	2.90669	1.53938	0.250541	up	no
ENST00000601016	ENSG00000102125	TAZ	2.36617	0.994278	1.24203	0	2.7056	1.43595	0.459162	up	no
ENST00000610432	ENSG00000102158	MAGT1	0.370701	1.57119	2.71767	3.20453	0.3279	-1.60867	0.186223	down	no
ENST00000614628	ENSG00000102221	JADE3	4.64567	7.83916	3.85737	3.69789	1.65247	0.724622	0.387394	up	no
ENST00000357227	ENSG00000102225	CDK16	27.2229	26.4301	32.2977	38.1259	0.761861	-0.3924	0.460313	down	no
ENST00000218364	ENSG00000102241	HTATSF1	19.3873	25.2479	18.399	12.5607	1.44172	0.52779	0.444313	up	no
ENST00000535601	ENSG00000102241	HTATSF1	8.10477	1.61412	7.5082	13.7998	0.456114	-1.13253	0.226376	down	no
ENST00000377017	ENSG00000102265	TIMP1	0.498037	1.63328	3.46904	1.92615	0.395039	-1.33993	0.319284	down	no
ENST00000491243	ENSG00000102312	PORCN	0.29354	0.406899	0.552664	1.92527	0.282671	-1.8228	0.173177	down	no
ENST00000375058	ENSG00000102316	MAGED2	0	18.5934	18.3069	22.0762	0.460423	-1.11897	0.504114	down	no
ENST00000375068	ENSG00000102316	MAGED2	22.041	0.214015	6.09473	0.357195	3.44936	1.78633	0.282909	up	no
ENST00000396224	ENSG00000102316	MAGED2	0.821942	3.27169	0.312914	0.531545	4.84764	2.27728	0.112017	up	no
ENST00000468823	ENSG00000102393	GLA	0.072643	0.369994	0.705938	1.72064	0.182412	-2.45473	0.0897927	down	no
ENST00000675968	ENSG00000102393	GLA	3.6354	2.30802	1.86863	1.15112	1.96818	0.976863	0.398492	up	no
ENST00000398316	ENSG00000102531	FNDC3A	7.40033	3.34808	7.91708	7.53344	0.695666	-0.523533	0.443726	down	no
ENST00000218789	ENSG00000102606	ARHGEF7	0.030899	0.121045	1.08135	0.378991	0.104047	-3.26469	0.0284473	down	yes
ENST00000350612	ENSG00000102710	SUPT20H	1.99926	2.4197	4.02068	8.77008	0.34548	-1.53333	0.136606	down	no
ENST00000356185	ENSG00000102710	SUPT20H	2.57731	2.6764	0.042631	0.022881	80.1946	6.32543	0.00014434	up	yes
ENST00000360252	ENSG00000102710	SUPT20H	3.71777	0.477718	6.96875	2.00915	0.467312	-1.09754	0.388658	down	no
ENST00000475892	ENSG00000102710	SUPT20H	9.73732	11.2361	6.75903	6.18435	1.6204	0.69635	0.401968	up	no
ENST00000490716	ENSG00000102710	SUPT20H	0.474149	0.569905	0.42933	0	2.43182	1.28204	0.494705	up	no
ENST00000501704	ENSG00000102804	TSC22D1	1.74166	1.53366	0.783129	0.544805	2.46648	1.30245	0.315551	up	no
ENST00000622051	ENSG00000102804	TSC22D1	0.177382	2.21356	0.283111	0.284293	4.21382	2.07513	0.177668	up	no
ENST00000345057	ENSG00000102871	TRADD	1.03854	0.925787	2.43403	2.05479	0.437605	-1.1923	0.34574	down	no
ENST00000486556	ENSG00000102871	TRADD	1.50004	1.3936	0.500799	0.316293	3.54139	1.82432	0.170806	up	no
ENST00000263025	ENSG00000102882	MAPK3	26.9799	14.5482	28.2816	36.827	0.637828	-0.648761	0.314891	down	no
ENST00000395199	ENSG00000102882	MAPK3	0.740376	1.25478	0.696958	0.256804	2.09188	1.0648	0.473822	up	no
ENST00000568396	ENSG00000102898	NUTF2	7.97318	18.682	19.5873	24.1698	0.609163	-0.7151	0.39281	down	no
ENST00000569436	ENSG00000102898	NUTF2	58.886	34.803	43.8298	19.7592	1.47335	0.559103	0.457018	up	no
ENST00000440851	ENSG00000102901	CENPT	5.7846	6.49674	3.70836	0.022297	3.29201	1.71897	0.296218	up	no
ENST00000564128	ENSG00000102901	CENPT	0.430739	0.527169	0.245207	0.114116	2.66587	1.41461	0.320633	up	no
ENST00000565157	ENSG00000102901	CENPT	0.899584	0.810463	13.681	1.45095	0.113009	-3.14549	0.0205862	down	yes
ENST00000569862	ENSG00000102901	CENPT	13.8106	10.8724	3.25183	13.2514	1.49564	0.580767	0.50465	up	no
ENST00000354436	ENSG00000102908	NFAT5	1.42491	4.51543	3.42455	4.71621	0.729703	-0.454619	0.499762	down	no
ENST00000426654	ENSG00000102908	NFAT5	7.18994	3.7732	9.30199	6.63865	0.687748	-0.540049	0.352602	down	no
ENST00000571392	ENSG00000102967	DHODH	0.238256	0.185598	0.379396	0.458048	0.506128	-0.982425	0.473971	down	no
ENST00000264010	ENSG00000102974	CTCF	5.47873	9.24186	19.6216	11.1675	0.478111	-1.06458	0.11394	down	no
ENST00000646566	ENSG00000102974	CTCF	1.80435	0.314325	0.225223	0.588116	2.60491	1.38123	0.338474	up	no
ENST00000646771	ENSG00000102974	CTCF	12.5294	9.39352	2.27957	8.60805	2.01357	1.00975	0.236014	up	no
ENST00000425432	ENSG00000102984	ZNF821	1.07121	0	1.65887	0.884729	0.421139	-1.24763	0.497441	down	no
ENST00000565601	ENSG00000102984	ZNF821	0.70386	2.16714	0.708065	0.646626	2.1193	1.08359	0.428311	up	no
ENST00000611294	ENSG00000102984	ZNF821	0.516611	0.053095	0.731114	0.784438	0.375907	-1.41155	0.343059	down	no
ENST00000563149	ENSG00000103005	USB1	0.239591	0.536569	1.69116	0.562778	0.344357	-1.53802	0.244641	down	no
ENST00000421602	ENSG00000103034	NDRG4	0.185835	0.109575	0.156996	0.562404	0.410634	-1.28408	0.33023	down	no
ENST00000563209	ENSG00000103034	NDRG4	0.423706	0.957988	0.330892	0.398465	1.8944	0.921741	0.494877	up	no
ENST00000568615	ENSG00000103035	PSMD7	1.18111	1.19194	3.35442	2.16226	0.430159	-1.21706	0.338148	down	no
ENST00000323786	ENSG00000103051	COG4	5.12692	2.41833	12.5055	7.64714	0.374405	-1.41733	0.115131	down	no
ENST00000530314	ENSG00000103051	COG4	2.15416	4.49245	1.59875	1.44096	2.18659	1.12868	0.344023	up	no
ENST00000564415	ENSG00000103051	COG4	2.59536	3.34131	0.029664	0.273652	19.5726	4.29076	0.00639503	up	yes
ENST00000379152	ENSG00000103064	SLC7A6	0	0	1.33416	0.174582	-inf	-inf	1.73039e-05	down	yes
ENST00000565858	ENSG00000103067	ESRP2	2.63695	0.328555	0.097399	0	30.447	4.92823	0.0169112	up	yes
ENST00000567291	ENSG00000103111	MON1B	0.981584	0.786279	0.506963	0.216887	2.44231	1.28824	0.385919	up	no
ENST00000574980	ENSG00000103145	HCFC1R1	1.4454	1.03906	0	0.412556	6.02211	2.59027	0.167133	up	no
ENST00000399953	ENSG00000103148	NPRL3	12.9119	12.553	16.4061	17.8452	0.743474	-0.427646	0.487807	down	no
ENST00000611875	ENSG00000103148	NPRL3	0.1987	1.72658	0.266503	0.280431	3.52013	1.81563	0.219538	up	no
ENST00000621703	ENSG00000103148	NPRL3	3.725	1.19877	0.529057	0.052173	8.4713	3.08258	0.050555	up	no
ENST00000619773	ENSG00000103160	HSDL1	1.09973	0.870958	0.354162	0.67436	1.91604	0.938127	0.485598	up	no
ENST00000312251	ENSG00000103174	NAGPA	4.1122	3.89576	0.510786	2.45949	2.69603	1.43084	0.280669	up	no
ENST00000381955	ENSG00000103174	NAGPA	1e-05	0.026716	0.810011	1.0996	0.0139955	-6.15889	0.000937994	down	yes
ENST00000562743	ENSG00000103194	USP10	2.17564	1.43149	0	0	inf	inf	8.60996e-05	up	yes
ENST00000219476	ENSG00000103197	TSC2	0.682641	0.061407	3.37781	0	0.220275	-2.18262	0.313728	down	no
ENST00000350773	ENSG00000103197	TSC2	0.420576	1.20903	0.191697	3.40991	0.452467	-1.14412	0.417176	down	no
ENST00000401874	ENSG00000103197	TSC2	0.360158	3.59146	0.173831	1.58997	2.24039	1.16375	0.439082	up	no
ENST00000569930	ENSG00000103197	TSC2	0.348274	0.246434	0.086352	0.17474	2.27777	1.18762	0.414641	up	no
ENST00000644399	ENSG00000103197	TSC2	0.245238	0	0.18522	0.750046	0.262212	-1.93119	0.303273	down	no
ENST00000381214	ENSG00000103248	MTHFSD	0.588469	0.244155	1.66893	2.05337	0.223686	-2.16046	0.100419	down	no
ENST00000448525	ENSG00000103249	CLCN7	1.67381	0.471696	2.37695	3.25757	0.380779	-1.39297	0.244519	down	no
ENST00000565092	ENSG00000103249	CLCN7	0.109751	0.382548	0.224043	1.55066	0.277398	-1.84997	0.204362	down	no
ENST00000389701	ENSG00000103253	HAGHL	2.68231	0.514201	0.209722	1.02975	2.57894	1.36678	0.351873	up	no
ENST00000569604	ENSG00000103253	HAGHL	0.670722	0.730153	0.090212	0.037927	10.9325	3.45055	0.0264353	up	yes
ENST00000647875	ENSG00000103253	HAGHL	0	0	0.662471	0.950467	-inf	-inf	3.59892e-05	down	yes
ENST00000261622	ENSG00000103257	SLC7A5	85.971	82.4858	58.5803	62.4183	1.39222	0.477388	0.412411	up	no
ENST00000219542	ENSG00000103260	METRN	0.219756	0	2.12053	1.3423	0.0634614	-3.97798	0.0318828	down	yes
ENST00000219548	ENSG00000103266	STUB1	12.7142	11.1962	21.1801	20.0592	0.579796	-0.786384	0.322124	down	no
ENST00000566408	ENSG00000103266	STUB1	8.49111	5.68091	2.73925	4.27466	2.02056	1.01475	0.441137	up	no
ENST00000569248	ENSG00000103266	STUB1	10.7177	11.6325	2.9542	4.76959	2.89368	1.53291	0.132828	up	no
ENST00000433392	ENSG00000103274	NUBP1	0	0.41942	1.50767	1.17325	0.156447	-2.67626	0.145051	down	no
ENST00000325437	ENSG00000103275	UBE2I	2.45517	0	0	10.3896	0.236311	-2.08124	0.435525	down	no
ENST00000397514	ENSG00000103275	UBE2I	19.021	36.2153	22.8253	17.3409	1.37519	0.459635	0.501479	up	no
ENST00000397515	ENSG00000103275	UBE2I	2.97621	5.59207	10.6161	4.50302	0.566716	-0.819301	0.362923	down	no
ENST00000570646	ENSG00000103415	HMOX2	26.0652	3.0563	7.61981	9.07561	1.74428	0.802634	0.459976	up	no
ENST00000566710	ENSG00000103429	BFAR	0	0.124268	1.09813	0.701687	0.0690447	-3.85633	0.036651	down	yes
ENST00000262135	ENSG00000103494	RPGRIP1L	0.445659	1.05136	1.6151	1.92413	0.42298	-1.24134	0.257469	down	no
ENST00000566568	ENSG00000103507	BCKDK	2.76319	1.30215	1.13657	0.755636	2.14847	1.10331	0.406896	up	no
ENST00000562034	ENSG00000103528	SYT17	0.326366	0.191763	0.203799	0	2.54235	1.34616	0.486712	up	no
ENST00000381414	ENSG00000103534	TMC5	0	0.003449	1.68537	0.169528	0.0018594	-9.07095	0.000149738	down	yes
ENST00000396212	ENSG00000103540	CCP110	4.69753	3.37012	5.92089	6.84269	0.632083	-0.661814	0.35746	down	no
ENST00000493683	ENSG00000103549	RNF40	0.190254	0	0.258605	0.978992	0.153729	-2.70154	0.152779	down	no
ENST00000563683	ENSG00000103549	RNF40	2.11286	0	3.09383	1.95676	0.418338	-1.25726	0.501418	down	no
ENST00000261880	ENSG00000103591	AAGAB	5.63088	7.58875	20.4182	17.9799	0.344278	-1.53835	0.0215835	down	yes
ENST00000561452	ENSG00000103591	AAGAB	21.4362	19.3194	0.058598	2.57774	15.4592	3.95039	0.00321589	up	yes
ENST00000514049	ENSG00000103599	IQCH	0.284932	0.474364	0.178612	0.013534	3.95166	1.98246	0.218522	up	no
ENST00000394132	ENSG00000103852	TTC23	0.805455	0.102181	2.02626	2.7551	0.189828	-2.39723	0.088972	down	no
ENST00000394135	ENSG00000103852	TTC23	1.01078	3.1058	1.14795	1.00479	1.91225	0.935272	0.492215	up	no
ENST00000318424	ENSG00000103855	CD276	0.059189	5.18978	3.10481	9.13553	0.428825	-1.22154	0.39998	down	no
ENST00000562303	ENSG00000103932	RPAP1	0.276046	1.01716	0.271829	0.323675	2.17161	1.11877	0.425577	up	no
ENST00000569075	ENSG00000103978	TMEM87A	0.709734	0.208674	0.270012	1.72037	0.461423	-1.11584	0.457158	down	no
ENST00000543779	ENSG00000104093	DMXL2	0	0.958876	2.74575	2.75473	0.174326	-2.52014	0.148214	down	no
ENST00000560891	ENSG00000104093	DMXL2	3.97859	2.29935	0.989863	1.19612	2.8719	1.52201	0.0774514	up	no
ENST00000424492	ENSG00000104131	EIF3J	3.09825	0.462972	0.517099	0.788016	2.72867	1.4482	0.312489	up	no
ENST00000558319	ENSG00000104133	SPG11	0.240817	0.272061	1.05756	0.061899	0.458149	-1.12611	0.440742	down	no
ENST00000567523	ENSG00000104164	BLOC1S6	0.345314	0.153716	0.55568	0.70017	0.397364	-1.33147	0.334133	down	no
ENST00000568816	ENSG00000104164	BLOC1S6	6.2418	1.557	0.569186	3.20304	2.06743	1.04784	0.39496	up	no
ENST00000521198	ENSG00000104205	SGK3	2.26245	0	0	0.482877	4.68535	2.22816	0.402586	up	no
ENST00000220669	ENSG00000104231	ZFAND1	2.33185	2.16985	5.23382	5.66924	0.412885	-1.27619	0.251436	down	no
ENST00000520604	ENSG00000104231	ZFAND1	3.60575	1.94028	15.0996	5.02167	0.27563	-1.8592	0.160323	down	no
ENST00000240093	ENSG00000104290	FZD3	2.14493	2.52007	1.23256	1.41388	1.76275	0.81783	0.314476	up	no
ENST00000537916	ENSG00000104290	FZD3	0.000157	0	0.922418	0.902513	8.60306e-05	-13.5048	1.19667e-07	down	yes
ENST00000396252	ENSG00000104320	NBN	0.798501	0.450809	1.17841	1.11619	0.544457	-0.877109	0.47677	down	no
ENST00000422906	ENSG00000104343	UBE2W	0.335942	0.127765	0.167188	0.972335	0.406931	-1.29714	0.352107	down	no
ENST00000517608	ENSG00000104343	UBE2W	3.77808	3.64671	1.03981	1.06685	3.52445	1.8174	0.041501	up	yes
ENST00000602593	ENSG00000104343	UBE2W	0.668326	1.66898	4.13331	3.56519	0.303605	-1.71973	0.0503912	down	no
ENST00000520545	ENSG00000104361	NIPAL2	0.17638	0.231743	0.923294	0.620536	0.264357	-1.91944	0.176868	down	no
ENST00000520201	ENSG00000104365	IKBKB	0.952218	3.51974	0.367967	0	12.1532	3.60326	0.068634	up	no
ENST00000674865	ENSG00000104381	GDAP1	0.588938	0.256651	4.85836	0.091971	0.170815	-2.5495	0.111908	down	no
ENST00000675928	ENSG00000104381	GDAP1	0.575447	0.46498	0	0.133889	7.77082	2.95807	0.114918	up	no
ENST00000519030	ENSG00000104408	EIF3E	81.1267	0	98.0133	95.5446	0.419134	-1.25452	0.472812	down	no
ENST00000519627	ENSG00000104408	EIF3E	6.84601	9.8419	1.8487	2.39923	3.92848	1.97397	0.139052	up	no
ENST00000522445	ENSG00000104408	EIF3E	17.7052	15.6994	5.24009	9.02167	2.34225	1.2279	0.274775	up	no
ENST00000519450	ENSG00000104412	EMC2	0.594079	0.636527	0.307982	0.331739	1.92366	0.943854	0.467781	up	no
ENST00000519278	ENSG00000104419	NDRG1	0.826968	4.0789	0.305906	0.179777	10.101	3.33642	0.0212647	up	yes
ENST00000220888	ENSG00000104447	TRPS1	0	0	0.757015	0.733889	-inf	-inf	2.9037e-06	down	yes
ENST00000388798	ENSG00000104450	SPAG1	13.1236	1.5546	1.28296	1.35782	5.5583	2.47464	0.0336125	up	yes
ENST00000345957	ENSG00000104497	SNX16	3.23133	0.870467	0.572559	1.12289	2.41929	1.27459	0.349655	up	no
ENST00000220959	ENSG00000104517	UBR5	0.80656	0.719511	1.65215	2.7445	0.347099	-1.52658	0.120869	down	no
ENST00000526406	ENSG00000104518	GSDMD	0.375677	0.285803	2.47414	0.233863	0.244269	-2.03346	0.169508	down	no
ENST00000531184	ENSG00000104518	GSDMD	1.45788	0.829258	0.10974	0.601417	3.21608	1.6853	0.233656	up	no
ENST00000395119	ENSG00000104529	EEF1D	38.0722	22.1002	146.505	17.9839	0.365815	-1.45081	0.084947	down	no
ENST00000442189	ENSG00000104529	EEF1D	6.60123	26.1959	11.2788	9.36655	1.58859	0.667751	0.45477	up	no
ENST00000529007	ENSG00000104529	EEF1D	69.2899	41.144	77.2439	72.8382	0.735823	-0.442569	0.463462	down	no
ENST00000529516	ENSG00000104529	EEF1D	0.106165	0.879894	8.14427	5.40123	0.072796	-3.78	0.0146939	down	yes
ENST00000530545	ENSG00000104529	EEF1D	1.89364	1.57451	3.90213	3.30933	0.480921	-1.05613	0.391351	down	no
ENST00000531621	ENSG00000104529	EEF1D	15.7804	20.942	64.589	16.3345	0.453792	-1.1399	0.187605	down	no
ENST00000533833	ENSG00000104529	EEF1D	1.2103	1.273	4.43783	0.528732	0.500005	-0.999985	0.460307	down	no
ENST00000519207	ENSG00000104611	SH2D4A	0.862943	2.20127	0.938257	6.83234	0.394334	-1.34251	0.323439	down	no
ENST00000523711	ENSG00000104728	ARHGEF10	1.17067	0.164417	0.202369	0.243388	2.9951	1.58261	0.268501	up	no
ENST00000637609	ENSG00000104763	ASAH1	0.480383	1.48412	0.301161	0.635375	2.09762	1.06876	0.438978	up	no
ENST00000638028	ENSG00000104763	ASAH1	0.324316	0.251233	0.654333	0.680803	0.431079	-1.21398	0.358853	down	no
ENST00000600909	ENSG00000104783	KCNN4	0.460812	0.462552	0.980374	0.737328	0.537558	-0.895508	0.498849	down	no
ENST00000263276	ENSG00000104812	GYS1	0.656278	0.262463	0.044776	0	20.5186	4.35886	0.0246951	up	yes
ENST00000601813	ENSG00000104824	HNRNPL	1.13427	0	3.85821	3.0188	0.164937	-2.60001	0.150167	down	no
ENST00000598441	ENSG00000104852	SNRNP70	10.6973	29.9276	16.3908	9.01645	1.59895	0.677123	0.444917	up	no
ENST00000587112	ENSG00000104859	CLASRP	4.49064	3.98006	1.0479	0.854889	4.45173	2.15437	0.109982	up	no
ENST00000391941	ENSG00000104884	ERCC2	0.779486	4.62495	0.397758	0.639956	5.20802	2.38074	0.098217	up	no
ENST00000391945	ENSG00000104884	ERCC2	5.96472	0	8.50847	7.83537	0.364952	-1.45422	0.398516	down	no
ENST00000646507	ENSG00000104884	ERCC2	2.0111	3.14595	0.00674	0	765.142	9.57958	5.09346e-06	up	yes
ENST00000589097	ENSG00000104886	PLEKHJ1	1.34366	0.517658	0.039023	0.508647	3.39861	1.76495	0.242312	up	no
ENST00000593017	ENSG00000104889	RNASEH2A	1.36619	0.858517	0.328154	0	6.77945	2.76117	0.148712	up	no
ENST00000643757	ENSG00000104889	RNASEH2A	0.858931	0.671567	1.72263	1.33105	0.501198	-0.996548	0.450463	down	no
ENST00000470402	ENSG00000104892	KLC3	2.39153	1.06026	1.21806	0.390285	2.14617	1.10177	0.428473	up	no
ENST00000592314	ENSG00000104897	SF3A2	1.32984	3.84615	1.49728	0.392776	2.73853	1.4534	0.306111	up	no
ENST00000581150	ENSG00000104904	OAZ1	64.8637	63.8065	9.86745	10.4982	6.31799	2.65946	0.000161198	up	yes
ENST00000582888	ENSG00000104904	OAZ1	89.517	78.9768	7.25287	7.76741	11.2178	3.48771	1.21797e-06	up	yes
ENST00000589739	ENSG00000104904	OAZ1	14.9287	13.3075	4.06629	4.44195	3.3187	1.73062	0.166534	up	no
ENST00000590943	ENSG00000104904	OAZ1	32.3269	24.0098	11.2477	4.49154	3.57939	1.83971	0.0599508	up	no
ENST00000592727	ENSG00000104904	OAZ1	5.85287	0.538792	1.00732	1.14323	2.9721	1.57148	0.287347	up	no
ENST00000592787	ENSG00000104904	OAZ1	6.82408	12.5658	0.207731	0.562485	25.1746	4.6539	0.00217728	up	yes
ENST00000602676	ENSG00000104904	OAZ1	30.3444	27.613	172.922	169.581	0.169217	-2.56305	1.32706e-05	down	yes
ENST00000592062	ENSG00000104907	TRMT1	0.441488	1.23653	0.686063	0.033123	2.33321	1.22232	0.445616	up	no
ENST00000242770	ENSG00000104915	STX10	8.74238	0.928188	3.58213	16.661	0.477722	-1.06576	0.432926	down	no
ENST00000588848	ENSG00000104915	STX10	1.13147	1.00119	1.59079	3.21002	0.44423	-1.17062	0.357663	down	no
ENST00000354227	ENSG00000104936	DMPK	0.202105	0.181689	0.792599	0.889846	0.228117	-2.13216	0.123024	down	no
ENST00000597793	ENSG00000104960	PTOV1	0.25027	0.643407	0.96117	1.07076	0.439816	-1.18503	0.35148	down	no
ENST00000598325	ENSG00000104960	PTOV1	0	0	8.17595	5.06282	-inf	-inf	2.09249e-07	down	yes
ENST00000599732	ENSG00000104960	PTOV1	2.66184	6.42711	1.64597	3.18586	1.88105	0.911541	0.487793	up	no
ENST00000601675	ENSG00000104960	PTOV1	6.25943	0.784465	0.984249	0.810523	3.92468	1.97257	0.177478	up	no
ENST00000327141	ENSG00000104964	TLE5	22.1817	33.9205	12.2172	23.8865	1.55392	0.635908	0.387777	up	no
ENST00000586839	ENSG00000104964	TLE5	3.46962	0.472568	6.46672	4.64152	0.354889	-1.49456	0.284303	down	no
ENST00000587393	ENSG00000104964	TLE5	5.62914	4.44299	0.53037	27.603	0.358013	-1.48192	0.303834	down	no
ENST00000221576	ENSG00000104979	C19orf53	0.497136	0	10.3	2.35164	0.0392941	-4.66954	0.012956	down	yes
ENST00000594092	ENSG00000105053	VRK3	3.7289	1.66273	0.909474	0.369443	4.21578	2.0758	0.1375	up	no
ENST00000599538	ENSG00000105053	VRK3	0.109303	0.374412	0.185919	2.42967	0.184935	-2.43491	0.116371	down	no
ENST00000601912	ENSG00000105053	VRK3	0.610564	0.491053	1.17972	1.04361	0.495479	-1.0131	0.410343	down	no
ENST00000412770	ENSG00000105063	PPP6R1	6.4079	36.7905	38.0122	39.8301	0.554948	-0.849576	0.231106	down	no
ENST00000587283	ENSG00000105063	PPP6R1	40.1954	0.297288	0.21591	0.223968	92.0544	6.52442	9.14856e-05	up	yes
ENST00000587457	ENSG00000105063	PPP6R1	6.49168	0.132241	0.404207	0.133023	12.3298	3.62407	0.0424076	up	yes
ENST00000594035	ENSG00000105072	C19orf44	0.63545	0.303491	0.148264	0.060951	4.48792	2.16605	0.148248	up	no
ENST00000597244	ENSG00000105085	MED26	0.643289	0.780095	0.036924	0.033774	20.1333	4.33151	0.00284896	up	yes
ENST00000522346	ENSG00000105136	ZNF419	0.873444	0.969761	0.343829	0.392843	2.50207	1.32312	0.31243	up	no
ENST00000591824	ENSG00000105171	POP4	1.59572	2.24879	0.410011	0.228518	6.02088	2.58997	0.0778968	up	no
ENST00000586035	ENSG00000105185	PDCD5	7.14176	4.98154	17.0267	14.3401	0.386501	-1.37146	0.245993	down	no
ENST00000586316	ENSG00000105185	PDCD5	1.7329	2.91513	10.3676	5.25748	0.297473	-1.74917	0.183087	down	no
ENST00000595386	ENSG00000105193	RPS16	0.860513	1.43804	0.580545	0.440907	2.25028	1.17011	0.416804	up	no
ENST00000544017	ENSG00000105197	TIMM50	9.16053	12.6081	4.68721	1.66588	3.42646	1.77672	0.0736875	up	no
ENST00000595527	ENSG00000105197	TIMM50	0.530135	1.73321	0.661324	0.294667	2.36754	1.24339	0.376144	up	no
ENST00000607714	ENSG00000105197	TIMM50	6.62668	3.83254	8.81497	10.4902	0.541784	-0.884209	0.194633	down	no
ENST00000594443	ENSG00000105202	FBL	0.458385	0	3.0021	11.6677	0.0312469	-5.00015	0.0104838	down	yes
ENST00000595545	ENSG00000105202	FBL	0.422245	1.35238	3.82322	41.0178	0.0395761	-4.65923	0.00163859	down	yes
ENST00000599159	ENSG00000105202	FBL	0.894324	0.767852	0.700109	3.53947	0.392061	-1.35085	0.322244	down	no
ENST00000593685	ENSG00000105204	DYRK1B	0.337176	0.666145	0.085902	0.287744	2.68522	1.42504	0.337918	up	no
ENST00000588991	ENSG00000105220	GPI	0.723234	0.224354	1.05203	0.687232	0.544821	-0.876147	0.491449	down	no
ENST00000392038	ENSG00000105221	AKT2	4.86134	5.75708	11.9359	4.77885	0.635272	-0.654555	0.349837	down	no
ENST00000476266	ENSG00000105221	AKT2	3.14097	0.679096	0.563864	0.928024	2.56056	1.35646	0.324058	up	no
ENST00000579047	ENSG00000105221	AKT2	2.19622	1.88519	0.408298	0.737243	3.56287	1.83304	0.176778	up	no
ENST00000672890	ENSG00000105221	AKT2	1.46011	1.85164	1.1346	0	2.91887	1.54541	0.409351	up	no
ENST00000409587	ENSG00000105223	PLD3	10.3046	0.062648	0	0.365577	28.3585	4.82571	0.0439172	up	yes
ENST00000409735	ENSG00000105223	PLD3	5.36838	5.54968	3.05385	2.90726	1.83155	0.873064	0.447966	up	no
ENST00000221855	ENSG00000105254	TBCB	28.3794	7.3564	26.5832	29.8474	0.63327	-0.659107	0.450778	down	no
ENST00000585746	ENSG00000105254	TBCB	0	5.73544	0.926096	0.39337	4.34679	2.11995	0.3058	up	no
ENST00000433867	ENSG00000105287	PRKD2	10.2007	4.76243	6.84346	1.0662	1.89175	0.919723	0.398166	up	no
ENST00000595515	ENSG00000105287	PRKD2	0.735438	1.36908	0.774574	0.256349	2.04139	1.02955	0.46257	up	no
ENST00000600194	ENSG00000105287	PRKD2	4.65709	3.94612	5.65611	7.38277	0.659812	-0.599874	0.501748	down	no
ENST00000586861	ENSG00000105290	APLP1	4.2432	1.89977	4.53317	7.44233	0.512961	-0.96308	0.386744	down	no
ENST00000643617	ENSG00000105321	CCDC9	2.32829	1.79834	1.59698	0.502697	1.96536	0.974794	0.475456	up	no
ENST00000595018	ENSG00000105323	HNRNPUL1	2.87519	10.5757	10.5336	17.2842	0.483536	-1.04831	0.203141	down	no
ENST00000395095	ENSG00000105325	FZR1	0.686196	1.61659	0.702694	0.166705	2.64871	1.40529	0.33609	up	no
ENST00000449228	ENSG00000105327	BBC3	1.38796	0.414657	2.27058	1.65561	0.459127	-1.12303	0.396304	down	no
ENST00000425460	ENSG00000105357	MYH14	2.92756	3.66846	1.4697	0	4.488	2.16607	0.237869	up	no
ENST00000264818	ENSG00000105397	TYK2	1.46365	3.24621	2.59556	5.35397	0.59247	-0.755185	0.454883	down	no
ENST00000600292	ENSG00000105404	RABAC1	2.24756	3.32678	0.64861	1.70929	2.36411	1.2413	0.352176	up	no
ENST00000601891	ENSG00000105404	RABAC1	0	1.02641	1.51631	5.97513	0.137011	-2.86763	0.11414	down	no
ENST00000648268	ENSG00000105409	ATP1A3	2.40892	1.90935	1.53383	0.795781	1.85365	0.890365	0.48543	up	no
ENST00000441740	ENSG00000105419	MEIS3	1.51429	1.4673	4.14695	4.32931	0.351758	-1.50735	0.217972	down	no
ENST00000558555	ENSG00000105419	MEIS3	3.70804	2.99162	0.122281	0.205985	20.4092	4.35115	0.00320518	up	yes
ENST00000561293	ENSG00000105419	MEIS3	0.245023	0.351472	0.636237	0.67763	0.454	-1.13924	0.385791	down	no
ENST00000251268	ENSG00000105429	MEGF8	0.1822	0.150351	1.9123	0.144613	0.161675	-2.62883	0.0673142	down	no
ENST00000391898	ENSG00000105483	CARD8	0.321089	0.305051	1.0851	0.282738	0.457758	-1.12734	0.392054	down	no
ENST00000651546	ENSG00000105483	CARD8	0.950647	1.59232	0.138318	0.791881	2.73379	1.4509	0.295591	up	no
ENST00000594067	ENSG00000105486	LIG1	0.099125	0.734149	1.35704	0.394863	0.475639	-1.07206	0.44495	down	no
ENST00000601091	ENSG00000105486	LIG1	0	8.03085	0	2.17745	3.6882	1.88292	0.488552	up	no
ENST00000402551	ENSG00000105552	BCAT2	2.00349	3.97356	8.4906	2.24259	0.556875	-0.844574	0.464233	down	no
ENST00000596981	ENSG00000105552	BCAT2	1.71841	2.01489	0.575106	1.03261	2.32212	1.21544	0.397667	up	no
ENST00000356861	ENSG00000105576	TNPO2	0	0.284519	1.07797	2.78639	0.0736265	-3.76363	0.0492377	down	yes
ENST00000425528	ENSG00000105576	TNPO2	11.721	9.77326	15.5982	15.0916	0.700373	-0.513804	0.368083	down	no
ENST00000450764	ENSG00000105576	TNPO2	2.2621	3.00522	0.209229	1.13484	3.91895	1.97047	0.125897	up	no
ENST00000585886	ENSG00000105576	TNPO2	11.8772	6.36353	4.41347	4.277	2.09893	1.06966	0.274894	up	no
ENST00000588216	ENSG00000105576	TNPO2	2.04893	6.77623	2.92165	0.324329	2.71879	1.44297	0.291821	up	no
ENST00000591470	ENSG00000105607	GCDH	2.56981	1.40053	0.575431	0.832329	2.82032	1.49586	0.267943	up	no
ENST00000591495	ENSG00000105613	MAST1	0	0	0.628541	0.612585	-inf	-inf	0.00033094	down	yes
ENST00000445124	ENSG00000105618	PRPF31	6.29031	2.39779	11.0464	7.88382	0.458954	-1.12358	0.356215	down	no
ENST00000466404	ENSG00000105618	PRPF31	1.03811	1.38887	0.313068	0.612688	2.62162	1.39046	0.288947	up	no
ENST00000675271	ENSG00000105647	PIK3R2	0.402372	1.74868	0.110191	0.802333	2.35725	1.23711	0.441786	up	no
ENST00000596124	ENSG00000105656	ELL	0.1917	0	0.618714	2.34096	0.0647707	-3.94851	0.0321912	down	yes
ENST00000262812	ENSG00000105669	COPE	20.7166	41.3187	42.6064	49.4367	0.67398	-0.569222	0.377352	down	no
ENST00000602113	ENSG00000105671	DDX49	0.35538	1.16927	1.9426	1.88095	0.398752	-1.32644	0.308442	down	no
ENST00000392335	ENSG00000105676	ARMC6	0	0	2.42765	2.07605	-inf	-inf	1.76809e-06	down	yes
ENST00000222305	ENSG00000105698	USF2	8.77498	12.976	2.08564	2.90248	4.36056	2.12451	0.0515016	up	no
ENST00000594064	ENSG00000105698	USF2	4.3477	3.9773	8.095	6.69304	0.562955	-0.828908	0.466446	down	no
ENST00000599471	ENSG00000105698	USF2	4.58508	1.35836	10.9539	6.91665	0.332584	-1.58821	0.201244	down	no
ENST00000540691	ENSG00000105700	KXD1	1.28623	0.826093	0	0.803437	2.62911	1.39458	0.459894	up	no
ENST00000398249	ENSG00000105723	GSK3A	2.08463	1.36427	0.712338	0.609562	2.60904	1.38352	0.289585	up	no
ENST00000222339	ENSG00000105732	ZNF574	1.72827	1.43532	0	0.724176	4.36853	2.12715	0.268977	up	no
ENST00000257659	ENSG00000105793	GTPBP10	0.101083	0.318695	0.790219	0.666054	0.288255	-1.79458	0.200646	down	no
ENST00000249270	ENSG00000105821	DNAJC2	1.91165	1.46001	0	0	inf	inf	4.51049e-06	up	yes
ENST00000475065	ENSG00000105821	DNAJC2	6.34695	26.2738	8.54131	9.40342	1.81785	0.862231	0.354018	up	no
ENST00000222574	ENSG00000105856	HBP1	1.51422	1.46769	2.29093	3.12099	0.55099	-0.859903	0.46304	down	no
ENST00000466182	ENSG00000105875	WDR91	0.077868	0.273111	0.452092	0.472466	0.379618	-1.39738	0.300551	down	no
ENST00000409761	ENSG00000105926	MPP6	0	1.03199	0.775357	12.5997	0.077158	-3.69604	0.0744982	down	no
ENST00000478000	ENSG00000105963	ADAP1	0.124718	1.19384	0.102469	0.38309	2.71554	1.44124	0.376307	up	no
ENST00000614113	ENSG00000105974	CAV1	0.159739	0.392813	0.724757	0.998563	0.320632	-1.64101	0.205207	down	no
ENST00000359422	ENSG00000105983	LMBR1	0	0.355994	1.78299	0.516044	0.154845	-2.6911	0.161528	down	no
ENST00000415428	ENSG00000105983	LMBR1	0.661414	0	1.47453	0.795045	0.291426	-1.7788	0.346918	down	no
ENST00000459889	ENSG00000105993	DNAJB6	0.524913	0.69874	2.10708	2.62338	0.258675	-1.95079	0.0597172	down	no
ENST00000465167	ENSG00000106028	SSBP1	2.01669	1.30383	5.29045	1.30981	0.50309	-0.991112	0.444822	down	no
ENST00000498107	ENSG00000106028	SSBP1	97.1334	56.6078	48.4536	39.6568	1.74487	0.803119	0.26648	up	no
ENST00000497897	ENSG00000106077	ABHD11	0.100993	0.480224	0.959384	0.661959	0.358479	-1.48004	0.300199	down	no
ENST00000395542	ENSG00000106078	COBL	4.20685	2.41169	0.498924	2.00787	2.64024	1.40067	0.2169	up	no
ENST00000445054	ENSG00000106078	COBL	0.21886	1.11126	4.0133	1.25141	0.252649	-1.98479	0.128484	down	no
ENST00000462395	ENSG00000106078	COBL	0.236737	0.093138	0.52119	0.301289	0.401074	-1.31806	0.312359	down	no
ENST00000395155	ENSG00000106089	STX1A	1.1251	5.48223	1.41685	1.85787	2.01768	1.0127	0.470902	up	no
ENST00000480126	ENSG00000106089	STX1A	0.66923	1.25715	1.56458	2.88794	0.432649	-1.20873	0.363209	down	no
ENST00000496643	ENSG00000106105	GARS1	0.27698	0.33008	0.126109	0.056847	3.31807	1.73034	0.239082	up	no
ENST00000447574	ENSG00000106211	HSPB1	33.0131	31.6621	21.9119	19.5451	1.56005	0.641596	0.364539	up	no
ENST00000426447	ENSG00000106244	PDAP1	12.6275	6.75236	4.38568	5.93436	1.87789	0.909109	0.473841	up	no
ENST00000222969	ENSG00000106245	BUD31	31.2702	35.4717	42.479	48.4297	0.734165	-0.445824	0.47228	down	no
ENST00000403633	ENSG00000106245	BUD31	40.1913	40.2021	24.7879	17.1927	1.91501	0.937355	0.196543	up	no
ENST00000620510	ENSG00000106261	ZKSCAN1	0.087858	0.776798	0.227261	0.042052	3.2106	1.68284	0.287641	up	no
ENST00000490309	ENSG00000106330	MOSPD3	0	0.552205	1.03545	1.33876	0.232584	-2.10417	0.249774	down	no
ENST00000486440	ENSG00000106333	PCOLCE	1.22526	1.13852	3.73845	2.03573	0.409371	-1.28852	0.307959	down	no
ENST00000480861	ENSG00000106348	IMPDH1	3.71567	3.50973	2.51117	0.741243	2.22155	1.15157	0.391547	up	no
ENST00000496200	ENSG00000106348	IMPDH1	11.1354	38.7414	12.6486	15.803	1.75304	0.809858	0.298504	up	no
ENST00000648462	ENSG00000106348	IMPDH1	0	4.00648	0.520476	0	7.69773	2.94443	0.263593	up	no
ENST00000410044	ENSG00000106355	LSM5	0.269009	0.395513	1.16651	3.71083	0.136247	-2.87571	0.0527639	down	no
ENST00000480956	ENSG00000106355	LSM5	1.17311	2.14755	0.752399	0.840209	2.08505	1.06008	0.430748	up	no
ENST00000403050	ENSG00000106443	PHF14	2.75269	1.45402	0.497974	0.483896	4.28438	2.09909	0.106006	up	no
ENST00000423760	ENSG00000106443	PHF14	0.467817	0.245092	0.533454	0.907355	0.494798	-1.01509	0.41906	down	no
ENST00000490957	ENSG00000106443	PHF14	1.44177	1.14845	0.501131	0.338472	3.08505	1.62529	0.219325	up	no
ENST00000521747	ENSG00000106443	PHF14	0.380113	0.221801	0.510464	0.665098	0.512022	-0.965721	0.460456	down	no
ENST00000460911	ENSG00000106462	EZH2	22.0035	23.5683	12.0508	17.3996	1.54741	0.629853	0.354224	up	no
ENST00000483967	ENSG00000106462	EZH2	0.962232	5.08555	17.6744	8.22161	0.233541	-2.09825	0.0392517	down	yes
ENST00000492143	ENSG00000106462	EZH2	4.39984	3.32913	1.2604	1.48698	2.81322	1.49222	0.190025	up	no
ENST00000675328	ENSG00000106477	CEP41	1.14274	0.9936	0.494537	0.205172	3.05318	1.61031	0.232993	up	no
ENST00000223336	ENSG00000106603	COA1	0.818946	0	1.3291	1.83987	0.258427	-1.95217	0.295407	down	no
ENST00000446330	ENSG00000106603	COA1	2.76788	0.440304	0	0.571953	5.60917	2.48779	0.199018	up	no
ENST00000453200	ENSG00000106608	URGCP	8.79718	0	1.11073	0	7.92015	2.98553	0.275854	up	no
ENST00000452185	ENSG00000106628	POLD2	19.8083	32.8897	13.823	6.67151	2.57132	1.36251	0.0917379	up	no
ENST00000450285	ENSG00000106638	TBL2	1.22641	0.487278	0.158256	0.421476	2.956	1.56365	0.254468	up	no
ENST00000485616	ENSG00000106686	SPATA6L	0.407494	0.517486	0.266449	0.208091	1.94921	0.962892	0.499782	up	no
ENST00000676011	ENSG00000106692	FKTN	0.310351	1.54211	0.681583	0.281029	1.92441	0.944415	0.503102	up	no
ENST00000375077	ENSG00000106789	CORO2A	0	2.97577	3.58878	3.25249	0.434973	-1.201	0.492634	down	no
ENST00000309195	ENSG00000106853	PTGR1	13.7798	21.6758	27.4273	30.2753	0.614454	-0.702623	0.331448	down	no
ENST00000407693	ENSG00000106853	PTGR1	25.2659	18.8865	13.2201	11.6535	1.77507	0.82788	0.294128	up	no
ENST00000374263	ENSG00000106868	SUSD1	1.09448	3.89155	1.16197	1.16949	2.13859	1.09666	0.4098	up	no
ENST00000374270	ENSG00000106868	SUSD1	4.54336	0.066033	4.96862	4.61064	0.481185	-1.05534	0.463195	down	no
ENST00000307564	ENSG00000106948	AKNA	1.01128	0.575663	0	0.330842	4.79667	2.26203	0.241268	up	no
ENST00000628346	ENSG00000106976	DNM1	1.52457	0.042537	0.37994	3.09346	0.451174	-1.14824	0.482377	down	no
ENST00000414202	ENSG00000107036	RIC1	2.52246	2.5214	5.06965	3.26805	0.604946	-0.725121	0.356486	down	no
ENST00000545641	ENSG00000107036	RIC1	3.07161	4.30056	2.06687	2.12451	1.75889	0.814664	0.450827	up	no
ENST00000432829	ENSG00000107099	DOCK8	0.313024	1.67392	1.80533	1.81339	0.549074	-0.864928	0.438992	down	no
ENST00000382303	ENSG00000107104	KANK1	0.332633	0.518036	0.812325	1.42008	0.381055	-1.39193	0.269134	down	no
ENST00000489369	ENSG00000107104	KANK1	0.103436	0.170799	0.898028	0.910696	0.151618	-2.72149	0.041521	down	yes
ENST00000379868	ENSG00000107201	DDX58	0.365653	0.173076	0.858425	0.502411	0.395881	-1.33686	0.298512	down	no
ENST00000379704	ENSG00000107262	BAG1	5.57475	6.81252	3.09504	1.2776	2.83291	1.50228	0.256992	up	no
ENST00000436441	ENSG00000107290	SETX	4.12121	4.22396	1.9534	2.60747	1.82973	0.871632	0.344772	up	no
ENST00000477049	ENSG00000107290	SETX	0.379439	0.195263	0.19422	0.09788	1.96748	0.976352	0.502407	up	no
ENST00000459850	ENSG00000107331	ABCA2	0.926898	0.094463	0.154458	0.085742	4.25213	2.08818	0.170761	up	no
ENST00000479446	ENSG00000107331	ABCA2	0.243852	0.287096	0.640121	0.44997	0.487068	-1.03781	0.412895	down	no
ENST00000376960	ENSG00000107372	ZFAND5	2.35027	9.01676	2.0861	2.84492	2.30521	1.2049	0.30038	up	no
ENST00000338546	ENSG00000107521	HPS1	2.46635	1.48973	0.508007	0.923401	2.76376	1.46663	0.27743	up	no
ENST00000432379	ENSG00000107643	MAPK8	0.869264	0.321273	1.09493	1.24999	0.50771	-0.977924	0.473386	down	no
ENST00000361114	ENSG00000107745	MICU1	21.7729	23.2564	5.89235	22.6635	1.57689	0.657079	0.404759	up	no
ENST00000398761	ENSG00000107745	MICU1	0.481421	0.29661	16.4284	0	0.0473589	-4.40022	0.0453071	down	yes
ENST00000415557	ENSG00000107796	ACTA2	1.62374	1.09956	3.42144	2.5413	0.456718	-1.13063	0.370657	down	no
ENST00000456827	ENSG00000107798	LIPA	0.243721	0.12937	0.529334	1.69497	0.167734	-2.57576	0.0640391	down	no
ENST00000370228	ENSG00000107815	TWNK	6.36888	6.85022	6.75123	11.7185	0.715717	-0.482539	0.499162	down	no
ENST00000396432	ENSG00000107863	ARHGAP21	0.817076	0.480394	1.31574	3.9383	0.246947	-2.01773	0.0664062	down	no
ENST00000486374	ENSG00000107863	ARHGAP21	12.4509	12.8387	11.3323	7.1173	1.37073	0.454949	0.484732	up	no
ENST00000337623	ENSG00000107938	EDRF1	1.57748	0.884	2.15189	2.32154	0.550244	-0.861855	0.447781	down	no
ENST00000542547	ENSG00000107968	MAP3K8	0	0	0.469306	0.442889	-inf	-inf	0.000148989	down	yes
ENST00000368644	ENSG00000108010	GLRX3	4.03808	7.39337	3.51489	3.65658	1.59402	0.672666	0.486884	up	no
ENST00000481034	ENSG00000108010	GLRX3	0.27696	0.720193	1.83605	0.38431	0.449095	-1.15491	0.386806	down	no
ENST00000322238	ENSG00000108039	XPNPEP1	0.87255	0	1.16203	1.32076	0.35144	-1.50865	0.417257	down	no
ENST00000369683	ENSG00000108039	XPNPEP1	1.4809	0	1.52564	3.96828	0.269553	-1.89136	0.323043	down	no
ENST00000265277	ENSG00000108061	SHOC2	0	0	0.899149	0.363723	-inf	-inf	1.85927e-05	down	yes
ENST00000451838	ENSG00000108061	SHOC2	1.0508	1.51396	0.202522	0.113955	8.10411	3.01865	0.0321018	up	yes
ENST00000374748	ENSG00000108094	CUL2	0.294692	0.824623	0.019081	0	58.6612	5.87434	0.0025236	up	yes
ENST00000558131	ENSG00000108107	RPL28	15.1168	15.825	0	12.5009	2.47516	1.30752	0.502295	up	no
ENST00000483798	ENSG00000108176	DNAJC12	2.39606	0.821328	3.21463	3.33826	0.490987	-1.02624	0.428704	down	no
ENST00000265450	ENSG00000108219	TSPAN14	0.560691	0.448281	1.8393	1.61993	0.291675	-1.77757	0.169894	down	no
ENST00000372158	ENSG00000108219	TSPAN14	0.071971	1.00549	1.34578	1.36952	0.396814	-1.33347	0.247015	down	no
ENST00000473217	ENSG00000108262	GIT1	0.926774	0.15917	3.90736	0.269939	0.259963	-1.94362	0.209555	down	no
ENST00000225430	ENSG00000108298	RPL19	461.485	489.258	408.937	241.476	1.46175	0.547699	0.366733	up	no
ENST00000579260	ENSG00000108298	RPL19	516.536	524.572	725.961	843.952	0.663163	-0.592565	0.253409	down	no
ENST00000579374	ENSG00000108298	RPL19	147.514	0	0	29.1428	5.06176	2.33964	0.378935	up	no
ENST00000264658	ENSG00000108306	FBXL20	2.17217	0	2.35458	2.63882	0.435007	-1.20089	0.492402	down	no
ENST00000475762	ENSG00000108384	RAD51C	6.06265	0.772975	1.95308	0.460695	2.83193	1.50179	0.310578	up	no
ENST00000577549	ENSG00000108406	DHX40	0.181906	0.31089	0.249129	0.784902	0.476578	-1.06922	0.434808	down	no
ENST00000225567	ENSG00000108433	GOSR2	1.18579	1.01623	0.252239	0.447062	3.14888	1.65484	0.239726	up	no
ENST00000638374	ENSG00000108433	GOSR2	1.66335	1.4025	0.591948	0.791695	2.21579	1.14782	0.387329	up	no
ENST00000640051	ENSG00000108433	GOSR2	0.626503	1.29965	3.59065	0.305091	0.494425	-1.01618	0.455929	down	no
ENST00000640495	ENSG00000108433	GOSR2	0.723907	0.307398	0	0.34431	2.99528	1.58269	0.406202	up	no
ENST00000641305	ENSG00000108439	PNPO	0.394969	0.475751	1.17769	0.506313	0.517052	-0.951618	0.453194	down	no
ENST00000641709	ENSG00000108439	PNPO	0	1.08721	1.34205	5.24749	0.16499	-2.59955	0.176314	down	no
ENST00000580287	ENSG00000108465	CDK5RAP3	1.27155	1.80626	0	0	inf	inf	3.08253e-06	up	yes
ENST00000584063	ENSG00000108465	CDK5RAP3	1.95066	1.41217	4.25257	2.58584	0.491756	-1.02399	0.3766	down	no
ENST00000393408	ENSG00000108468	CBX1	7.90118	11.8711	6.55416	4.82012	1.73833	0.797703	0.392939	up	no
ENST00000317905	ENSG00000108469	RECQL5	2.29288	2.27097	0.181505	2.01821	2.07475	1.05294	0.453835	up	no
ENST00000251334	ENSG00000108506	INTS2	0.637454	0.153057	0.603209	1.3322	0.408446	-1.29178	0.345094	down	no
ENST00000348066	ENSG00000108509	CAMTA2	0	0.010744	2.28477	0.190753	0.00434008	-7.84806	0.000428503	down	yes
ENST00000414043	ENSG00000108509	CAMTA2	0.592799	0.534139	0.032398	0.359316	2.87694	1.52454	0.305141	up	no
ENST00000574872	ENSG00000108518	PFN1	19.121	20.2883	10.6959	14.6111	1.55724	0.638995	0.489418	up	no
ENST00000262482	ENSG00000108523	RNF167	3.52045	4.11072	12.3643	8.37016	0.368043	-1.44205	0.150728	down	no
ENST00000575111	ENSG00000108523	RNF167	10.413	12.0862	8.10732	5.55838	1.6464	0.719319	0.464464	up	no
ENST00000225729	ENSG00000108591	DRG2	9.57912	5.57306	11.2421	12.3586	0.642023	-0.639303	0.459683	down	no
ENST00000261499	ENSG00000108641	B9D1	1.62078	1.1506	3.05518	2.29118	0.518368	-0.947951	0.451536	down	no
ENST00000663089	ENSG00000108641	B9D1	0.714414	0.459998	0.459427	0.122369	2.0186	1.01335	0.460935	up	no
ENST00000585317	ENSG00000108654	DDX5	1.4278	2.68457	0.667628	1.28276	2.10849	1.07621	0.418951	up	no
ENST00000457654	ENSG00000108671	PSMD11	0.988823	0.530446	2.3014	0.514652	0.539502	-0.890299	0.502761	down	no
ENST00000262776	ENSG00000108679	LGALS3BP	0.635547	0	1.20005	1.09374	0.277074	-1.85166	0.305757	down	no
ENST00000586663	ENSG00000108733	PEX12	0	0.543453	0.938784	0.417589	0.400666	-1.31953	0.473418	down	no
ENST00000346213	ENSG00000108774	RAB5C	64.7582	60.3389	34.417	34.4984	1.81523	0.86015	0.15659	up	no
ENST00000393860	ENSG00000108774	RAB5C	0.02449	0.297219	24.4046	25.8647	0.0063997	-7.28778	5.90154e-09	down	yes
ENST00000590050	ENSG00000108788	MLX	4.41027	1.77866	1.3985	1.32435	2.27296	1.18457	0.35606	up	no
ENST00000240304	ENSG00000108848	LUC7L3	14.7761	19.8471	9.73214	6.14734	2.18038	1.12458	0.176049	up	no
ENST00000578386	ENSG00000108854	SMURF2	1.34346	1.44289	0.086405	0.17581	10.6262	3.40955	0.0168435	up	yes
ENST00000582081	ENSG00000108854	SMURF2	20.3643	13.4599	12.6725	7.73411	1.65752	0.729022	0.257829	up	no
ENST00000590367	ENSG00000108883	EFTUD2	1.54152	0.50013	3.14	2.26103	0.378011	-1.4035	0.252978	down	no
ENST00000571732	ENSG00000108953	YWHAE	10.6088	29.5544	33.3255	103.915	0.292649	-1.77275	0.0158926	down	yes
ENST00000573196	ENSG00000108953	YWHAE	2.63077	1.081	0	18.8807	0.19659	-2.34674	0.267613	down	no
ENST00000575977	ENSG00000108953	YWHAE	0.96717	1.66939	0.528533	11.6333	0.216791	-2.20563	0.160908	down	no
ENST00000649377	ENSG00000108960	MMD	0.42132	0.257502	0	1.91828	0.35387	-1.49871	0.450837	down	no
ENST00000467843	ENSG00000109046	WSB1	3.16687	3.97642	4.73628	7.68076	0.575281	-0.797662	0.335711	down	no
ENST00000357814	ENSG00000109065	NAT9	3.56111	3.77621	1.81817	0.585009	3.05318	1.61031	0.23042	up	no
ENST00000226253	ENSG00000109107	ALDOC	3.54647	4.98696	5.46859	13.6797	0.44565	-1.16602	0.272078	down	no
ENST00000347486	ENSG00000109111	SUPT6H	0.459991	4.84675	21.7852	2.00674	0.223048	-2.16458	0.055709	down	no
ENST00000512093	ENSG00000109171	SLAIN2	3.93596	2.09125	1.7044	1.71508	1.76261	0.817712	0.471032	up	no
ENST00000264312	ENSG00000109180	OCIAD1	2.73769	3.02235	5.53198	7.47187	0.442949	-1.17479	0.313532	down	no
ENST00000381441	ENSG00000109184	DCUN1D4	1.55058	2.17975	3.99546	5.85782	0.378588	-1.4013	0.147563	down	no
ENST00000451288	ENSG00000109184	DCUN1D4	3.88712	4.96935	0	0	inf	inf	7.99248e-10	up	yes
ENST00000652619	ENSG00000109320	NFKB1	0.002571	0.076066	0.449256	1.60574	0.0382663	-4.70778	0.00826476	down	yes
ENST00000394801	ENSG00000109332	UBE2D3	0.711487	0.582971	4.70929	3.52453	0.157212	-2.66921	0.0363355	down	yes
ENST00000503418	ENSG00000109332	UBE2D3	2.6428	2.79517	0.217283	2.05073	2.39767	1.26163	0.383953	up	no
ENST00000503742	ENSG00000109332	UBE2D3	0.727237	1.22433	1.01961	2.88419	0.499915	-1.00025	0.442363	down	no
ENST00000394235	ENSG00000109381	ELF2	2.12632	0.294229	0.486501	0.490354	2.4779	1.30912	0.358601	up	no
ENST00000539002	ENSG00000109390	NDUFC1	4.27754	6.64898	2.61299	1.98	2.37895	1.25033	0.335793	up	no
ENST00000544855	ENSG00000109390	NDUFC1	0	0.641913	4.22096	0	0.152077	-2.71712	0.28059	down	no
ENST00000504920	ENSG00000109519	GRPEL1	0.564279	1.43945	0.784689	5.47617	0.32004	-1.64367	0.239868	down	no
ENST00000347613	ENSG00000109572	CLCN3	2.13985	3.53782	1.31319	0.646777	2.89682	1.53447	0.221699	up	no
ENST00000353187	ENSG00000109576	AADAT	1.2352	2.91549	0.378087	1.0753	2.85587	1.51393	0.27698	up	no
ENST00000675835	ENSG00000109654	TRIM2	0.126297	0.062487	1.84644	0.16489	0.0938605	-3.41334	0.0290303	down	yes
ENST00000281708	ENSG00000109670	FBXW7	2.07458	1.81916	3.14879	3.04573	0.628578	-0.669836	0.469016	down	no
ENST00000296555	ENSG00000109670	FBXW7	0.608299	0.791561	0.009303	0	150.474	7.23337	0.000115127	up	yes
ENST00000502873	ENSG00000109680	TBC1D19	1.32939	1.19139	0.405425	0	6.21762	2.63636	0.15182	up	no
ENST00000409252	ENSG00000109686	SH3D19	2.90302	2.92541	0	0.525405	11.0932	3.47161	0.0669296	up	no
ENST00000409598	ENSG00000109686	SH3D19	0.104689	0.090479	0.422792	0.726916	0.169754	-2.55848	0.0576616	down	no
ENST00000355443	ENSG00000109736	MFSD10	1.56183	4.1031	1.45519	1.22802	2.11125	1.0781	0.426495	up	no
ENST00000644902	ENSG00000109756	RAPGEF2	0.318397	0.174028	0.2162	2.20961	0.202994	-2.30049	0.11303	down	no
ENST00000504273	ENSG00000109762	SNX25	0	0.425017	0.182596	4.69688	0.0871029	-3.52113	0.098354	down	no
ENST00000505916	ENSG00000109771	LRP2BP	0.386196	0.392826	0.159759	0.120131	2.78331	1.4768	0.319286	up	no
ENST00000504108	ENSG00000109790	KLHL5	1.91159	0.492065	0.720458	6.34294	0.340298	-1.55513	0.268755	down	no
ENST00000508137	ENSG00000109790	KLHL5	2.7494	2.38484	0	0	inf	inf	5.70012e-07	up	yes
ENST00000316423	ENSG00000109814	UGDH	10.6978	8.19838	11.3009	14.6473	0.728225	-0.457544	0.489639	down	no
ENST00000501493	ENSG00000109814	UGDH	3.2244	4.38921	2.9585	0	2.57347	1.36371	0.485373	up	no
ENST00000525792	ENSG00000109920	FNBP4	1.31975	1.70102	0.60144	0.405308	3.00053	1.58522	0.270777	up	no
ENST00000307257	ENSG00000109944	JHY	0.494179	0.569494	0.107083	0.037376	7.36315	2.88032	0.0642955	up	no
ENST00000227378	ENSG00000109971	HSPA8	9.33704	147.022	27.5471	59.9271	1.78749	0.837934	0.393932	up	no
ENST00000453788	ENSG00000109971	HSPA8	1.8771	4.63925	0.967976	1.6521	2.48708	1.31445	0.325378	up	no
ENST00000524552	ENSG00000109971	HSPA8	1.63407	20.1394	2.67781	2.04017	4.61501	2.20633	0.130194	up	no
ENST00000527983	ENSG00000109971	HSPA8	1.88429	5.59911	1.7753	2.22318	1.87156	0.904242	0.504923	up	no
ENST00000532091	ENSG00000109971	HSPA8	4.56457	18.2896	4.49839	4.64312	2.50004	1.32195	0.192115	up	no
ENST00000534319	ENSG00000109971	HSPA8	7.92877	60.292	6.75347	7.10517	4.92262	2.29942	0.013603	up	yes
ENST00000392744	ENSG00000110002	VWA5A	0.429526	0.265502	0.48896	0.975573	0.474573	-1.0753	0.395752	down	no
ENST00000530561	ENSG00000110031	LPXN	0.897047	0.79263	0.028328	0	59.6469	5.89837	0.00274498	up	yes
ENST00000418259	ENSG00000110046	ATG2A	1.06089	0.564557	0.323786	3.58113	0.416255	-1.26446	0.344072	down	no
ENST00000613398	ENSG00000110060	PUS3	1.05498	1.24952	0	0.315517	7.30386	2.86866	0.125451	up	no
ENST00000401547	ENSG00000110066	KMT5B	1.70863	2.02545	1.4221	0.447754	1.99699	0.997826	0.468033	up	no
ENST00000615954	ENSG00000110066	KMT5B	0.488616	0.136882	0.536523	0.895736	0.436721	-1.19522	0.369241	down	no
ENST00000530642	ENSG00000110074	FOXRED1	0.586425	0.925706	0.473393	0.251977	2.08463	1.05979	0.430095	up	no
ENST00000534315	ENSG00000110074	FOXRED1	0.418119	1.84299	0.32291	0.296868	3.64825	1.8672	0.179621	up	no
ENST00000265636	ENSG00000110075	PPP6R3	3.1521	7.6726	2.1385	2.42133	2.37392	1.24727	0.194122	up	no
ENST00000524845	ENSG00000110075	PPP6R3	6.78155	0.779551	0.106311	3.1922	2.29227	1.19678	0.452292	up	no
ENST00000524904	ENSG00000110075	PPP6R3	0.877524	9.58604	11.7761	5.67014	0.59976	-0.737542	0.43449	down	no
ENST00000539743	ENSG00000110090	CPT1A	0.167665	0.180673	0.819724	2.47695	0.105663	-3.24245	0.021931	down	yes
ENST00000533724	ENSG00000110172	CHORDC1	0.629928	1.09584	0.899037	2.89064	0.455386	-1.13484	0.345477	down	no
ENST00000227618	ENSG00000110200	ANAPC15	3.03027	3.51082	8.55062	8.12051	0.39236	-1.34975	0.265756	down	no
ENST00000543587	ENSG00000110200	ANAPC15	2.20373	1.10135	0.552637	0.14524	4.73591	2.24364	0.139248	up	no
ENST00000545680	ENSG00000110200	ANAPC15	3.97542	1.40163	0.658255	0.124006	6.87373	2.78109	0.0632	up	no
ENST00000263468	ENSG00000110318	CEP126	0.194555	0.153051	0.468204	0.164598	0.549312	-0.864301	0.500895	down	no
ENST00000525681	ENSG00000110321	EIF4G2	3.63567	5.26174	4.17253	39.966	0.201579	-2.31058	0.0123582	down	yes
ENST00000532383	ENSG00000110321	EIF4G2	15.376	20.9139	24.3982	28.3727	0.687687	-0.540175	0.307281	down	no
ENST00000431736	ENSG00000110344	UBE4A	4.56636	2.74016	0.017941	0	407.253	8.66978	6.496e-07	up	yes
ENST00000620157	ENSG00000110367	DDX6	10.5668	7.03974	15.4462	13.3108	0.612251	-0.707804	0.228281	down	no
ENST00000265654	ENSG00000110427	KIAA1549L	0.264591	0.291857	0	0	inf	inf	0.000156598	up	yes
ENST00000265651	ENSG00000110429	FBXO3	7.43226	5.81542	4.44377	2.60369	1.87978	0.910564	0.395091	up	no
ENST00000526785	ENSG00000110429	FBXO3	1.0166	1.29343	1.20179	2.62608	0.603477	-0.728628	0.504211	down	no
ENST00000359803	ENSG00000110492	MDK	0.0173	0	1.50795	1.13461	0.00654668	-7.25502	0.00115302	down	yes
ENST00000395566	ENSG00000110492	MDK	116.532	102.163	153.494	138.127	0.749929	-0.415173	0.431951	down	no
ENST00000405308	ENSG00000110492	MDK	22.29	10.3583	66.1241	25.9878	0.354442	-1.49638	0.0518769	down	no
ENST00000407067	ENSG00000110492	MDK	58.0638	64.8415	10.2226	66.9141	1.59335	0.672059	0.43021	up	no
ENST00000458649	ENSG00000110497	AMBRA1	0.757269	0.851831	0.440922	0.276409	2.24318	1.16554	0.383365	up	no
ENST00000534300	ENSG00000110497	AMBRA1	0.522	0.392067	1.49744	2.4908	0.22919	-2.12538	0.0851235	down	no
ENST00000342922	ENSG00000110514	MADD	0	2.39937	0.306356	0.211645	4.63198	2.21163	0.299675	up	no
ENST00000349238	ENSG00000110514	MADD	1.1481	0.243835	0	4.52241	0.307785	-1.7	0.406306	down	no
ENST00000395344	ENSG00000110514	MADD	1.55751	0.94461	0.533267	0.713848	2.00633	1.00456	0.438076	up	no
ENST00000402192	ENSG00000110514	MADD	2.34638	2.71448	8.92721	1.39867	0.490114	-1.02881	0.273524	down	no
ENST00000402799	ENSG00000110514	MADD	1.71574	1.64345	0	0.771746	4.35272	2.12192	0.270685	up	no
ENST00000406482	ENSG00000110514	MADD	1.73813	1.43201	0	0.832485	3.80805	1.92905	0.318573	up	no
ENST00000426530	ENSG00000110536	PTPMT1	3.75127	2.88126	1.54021	1.36524	2.28279	1.1908	0.369887	up	no
ENST00000534775	ENSG00000110536	PTPMT1	0.731046	1.30624	2.82357	0.961581	0.538231	-0.893703	0.485832	down	no
ENST00000278224	ENSG00000110619	CARS1	5.03194	10.2437	3.865	3.35944	2.11445	1.08028	0.296829	up	no
ENST00000526890	ENSG00000110619	CARS1	0.898306	1.25988	0.317512	0.680906	2.1616	1.1121	0.39909	up	no
ENST00000468153	ENSG00000110651	CD81	1.59445	13.195	1.68453	4.23463	2.49856	1.3211	0.363355	up	no
ENST00000524461	ENSG00000110696	C11orf58	1.56495	2.44084	1.46143	0.038625	2.67043	1.41707	0.38886	up	no
ENST00000525684	ENSG00000110696	C11orf58	1.93704	3.90745	0.600443	0	9.73362	3.28298	0.0820623	up	no
ENST00000436757	ENSG00000110697	PITPNM1	4.13052	1.49303	0	0.061581	91.3197	6.51285	0.000751189	up	yes
ENST00000534749	ENSG00000110697	PITPNM1	0.566719	1.13981	1.94574	3.52413	0.311988	-1.68044	0.158495	down	no
ENST00000228140	ENSG00000110700	RPS13	29.9959	21.5647	53.1385	71.4658	0.413795	-1.27301	0.12428	down	no
ENST00000324932	ENSG00000110713	NUP98	5.91568	1.87756	10.6646	13.2004	0.326555	-1.6146	0.0253876	down	yes
ENST00000355260	ENSG00000110713	NUP98	4.96469	1.25491	0.103387	0.232315	18.5272	4.21157	0.00197441	up	yes
ENST00000359171	ENSG00000110713	NUP98	6.53062	12.189	6.65905	4.83213	1.62904	0.704022	0.313713	up	no
ENST00000397004	ENSG00000110713	NUP98	4.72661	5.34086	2.25375	1.30263	2.83081	1.50122	0.148412	up	no
ENST00000397007	ENSG00000110713	NUP98	0.174972	0.278727	0.896531	0.614951	0.300168	-1.73616	0.175096	down	no
ENST00000265686	ENSG00000110719	TCIRG1	1.62076	3.66788	0.045413	2.34038	2.21672	1.14842	0.479145	up	no
ENST00000356135	ENSG00000110721	CHKA	0.399777	2.57828	0.659553	0.537964	2.48686	1.31433	0.364332	up	no
ENST00000612048	ENSG00000110811	P3H3	0.296648	4.23225	0.37486	0.459193	5.42999	2.44095	0.120162	up	no
ENST00000619325	ENSG00000110841	PPFIBP1	0.568373	0.220951	0.573736	0.995016	0.503154	-0.990928	0.471956	down	no
ENST00000548825	ENSG00000110844	PRPF40B	0.548083	0.326183	0.096221	0	9.08602	3.18365	0.0964402	up	no
ENST00000420959	ENSG00000110880	CORO1C	30.7578	7.42567	0.063309	0.018722	465.476	8.86256	2.85683e-13	up	yes
ENST00000228468	ENSG00000110881	ASIC1	0.465201	2.56057	2.94157	3.61652	0.46138	-1.11597	0.334004	down	no
ENST00000395805	ENSG00000110888	CAPRIN2	2.62447	4.25089	5.74788	4.52323	0.669389	-0.579083	0.500167	down	no
ENST00000262052	ENSG00000110911	SLC11A2	6.47918	9.14904	10.5308	12.8525	0.66835	-0.581324	0.363348	down	no
ENST00000547198	ENSG00000110911	SLC11A2	0.138061	0.229155	0.678556	0.769269	0.253633	-1.97919	0.148524	down	no
ENST00000550782	ENSG00000110911	SLC11A2	4.70299	1.21777	0.964019	0.579422	3.83608	1.93963	0.140525	up	no
ENST00000228510	ENSG00000110921	MVK	2.55128	2.95467	0.489935	1.31825	3.04501	1.60645	0.217949	up	no
ENST00000447878	ENSG00000110921	MVK	1.85231	1.81224	0.612688	1.11042	2.12671	1.08862	0.415099	up	no
ENST00000539575	ENSG00000110921	MVK	0.928912	0.362988	2.07337	1.85575	0.328802	-1.60471	0.220143	down	no
ENST00000324774	ENSG00000110931	CAMKK2	0.669998	0.979549	0.254365	0	6.48496	2.6971	0.164268	up	no
ENST00000337174	ENSG00000110931	CAMKK2	3.4824	3.03261	3.07471	0.220657	1.97702	0.983327	0.439162	up	no
ENST00000347034	ENSG00000110931	CAMKK2	0.203392	0.96339	0.078188	0.027664	11.0228	3.46241	0.0241051	up	yes
ENST00000538733	ENSG00000110931	CAMKK2	2.50085	1.79109	3.08086	5.14753	0.521601	-0.938981	0.306749	down	no
ENST00000414274	ENSG00000110958	PTGES3	6.13934	42.4901	8.37612	13.1832	2.25561	1.17352	0.232137	up	no
ENST00000448157	ENSG00000110958	PTGES3	0.992512	4.17659	0.575835	1.66524	2.30653	1.20572	0.401168	up	no
ENST00000614328	ENSG00000110958	PTGES3	13.0536	6.22219	12.1528	18.3048	0.632875	-0.660008	0.401714	down	no
ENST00000228606	ENSG00000111012	CYP27B1	2.55455	2.95151	4.88962	5.10432	0.550939	-0.860036	0.420207	down	no
ENST00000547344	ENSG00000111012	CYP27B1	3.41042	2.79292	0.944652	0.916357	3.33332	1.73696	0.175964	up	no
ENST00000388835	ENSG00000111057	KRT18	49.3057	51.4579	97.3492	92.7946	0.529934	-0.916116	0.0973401	down	no
ENST00000388837	ENSG00000111057	KRT18	134.74	120.873	67.4568	62.6072	1.96528	0.974738	0.0918897	up	no
ENST00000550600	ENSG00000111057	KRT18	0.712858	1.02665	0.171558	0.65633	2.10114	1.07118	0.460527	up	no
ENST00000549311	ENSG00000111077	TNS2	0.312242	0.313873	0.000418	0	1497.88	10.5487	0.000280552	up	yes
ENST00000323666	ENSG00000111142	METAP2	43.7287	51.583	26.5422	43.617	1.35851	0.44202	0.47335	up	no
ENST00000535095	ENSG00000111142	METAP2	0.467089	0.140169	0.557707	0.720528	0.475075	-1.07377	0.427381	down	no
ENST00000546753	ENSG00000111142	METAP2	1.36319	1.8961	0	1.0883	2.99483	1.58247	0.404369	up	no
ENST00000551840	ENSG00000111142	METAP2	12.0622	4.57302	43.4568	5.85765	0.33733	-1.56777	0.101123	down	no
ENST00000413268	ENSG00000111144	LTA4H	4.10515	1.61112	1.44227	1.58901	1.88576	0.915145	0.493421	up	no
ENST00000553041	ENSG00000111144	LTA4H	3.30318	1.37626	1.2991	1.20006	1.8724	0.904891	0.415829	up	no
ENST00000644517	ENSG00000111203	ITFG2	0.301453	0	0.539264	0.303195	0.357825	-1.48267	0.425277	down	no
ENST00000645513	ENSG00000111203	ITFG2	0.563799	0.356128	0	0	inf	inf	0.000253378	up	yes
ENST00000342628	ENSG00000111206	FOXM1	18.6579	10.8223	7.2663	11.3389	1.58452	0.664044	0.355905	up	no
ENST00000361953	ENSG00000111206	FOXM1	1.99172	4.57785	5.40374	6.15981	0.568127	-0.815715	0.385723	down	no
ENST00000447133	ENSG00000111224	PARP11	0.355441	0.180381	0.044897	0.086187	4.08762	2.03126	0.169565	up	no
ENST00000360579	ENSG00000111237	VPS29	29.1813	34.9207	27.1922	0	2.35737	1.23718	0.493291	up	no
ENST00000549578	ENSG00000111237	VPS29	1.58992	1.23734	3.60526	9.81972	0.210597	-2.24744	0.0771005	down	no
ENST00000552130	ENSG00000111237	VPS29	2.67209	1.52521	1.71737	16.5228	0.230112	-2.11959	0.131741	down	no
ENST00000228843	ENSG00000111247	RAD51AP1	7.89	9.80184	3.87959	6.69826	1.67254	0.742038	0.459229	up	no
ENST00000442992	ENSG00000111247	RAD51AP1	3.86487	0.847346	1.42338	0	3.31059	1.72709	0.389938	up	no
ENST00000341259	ENSG00000111252	SH2B3	36.7088	39.2404	46.7169	49.2366	0.791521	-0.337301	0.4985	down	no
ENST00000545990	ENSG00000111254	AKAP3	0.418164	0	0.975091	0.089198	0.392905	-1.34775	0.48133	down	no
ENST00000396349	ENSG00000111261	MANSC1	0.699811	1.46211	2.58538	2.09294	0.462115	-1.11368	0.374374	down	no
ENST00000549590	ENSG00000111271	ACAD10	2.15315	0.290844	0.623071	0.241612	2.82646	1.499	0.310842	up	no
ENST00000416293	ENSG00000111275	ALDH2	0.276158	0.223837	0.571954	0.651503	0.408674	-1.29098	0.348987	down	no
ENST00000548536	ENSG00000111275	ALDH2	0.758473	0.318664	1.05636	1.29344	0.458396	-1.12533	0.373852	down	no
ENST00000549711	ENSG00000111300	NAA25	0.865603	0.752052	0.26063	0.593281	1.89441	0.921746	0.49019	up	no
ENST00000261692	ENSG00000111328	CDK2AP1	34.6055	33.9456	18.21	18.9815	1.8432	0.882209	0.215147	up	no
ENST00000535979	ENSG00000111328	CDK2AP1	0	0	9.12532	3.15933	-inf	-inf	8.64386e-07	down	yes
ENST00000544658	ENSG00000111328	CDK2AP1	0.538885	0.698121	2.98157	3.61769	0.187446	-2.41545	0.0669277	down	no
ENST00000652466	ENSG00000111328	CDK2AP1	2.25771	1.47293	3.95944	3.47948	0.501503	-0.995669	0.337042	down	no
ENST00000392583	ENSG00000111335	OAS2	0.083542	0.080529	1.16241	0.774512	0.0847073	-3.56137	0.0119319	down	yes
ENST00000543341	ENSG00000111358	GTF2H3	12.3605	11.3736	6.63271	5.76822	1.9139	0.936514	0.217426	up	no
ENST00000543415	ENSG00000111358	GTF2H3	0.379654	0.58647	1.0938	1.03967	0.452841	-1.14292	0.41205	down	no
ENST00000618160	ENSG00000111358	GTF2H3	0	0	4.52079	5.61576	-inf	-inf	2.97806e-09	down	yes
ENST00000543153	ENSG00000111445	RFC5	1.51999	1.28807	1.56587	3.55359	0.548507	-0.866418	0.495666	down	no
ENST00000261653	ENSG00000111450	STX2	0.984301	0.467796	0	0	inf	inf	1.35205e-05	up	yes
ENST00000393543	ENSG00000111554	MDM1	0.413329	1.30456	0.153711	0.589353	2.3119	1.20908	0.390358	up	no
ENST00000537662	ENSG00000111581	NUP107	1.47908	3.44526	0.92195	1.48383	2.04688	1.03343	0.442096	up	no
ENST00000229239	ENSG00000111640	GAPDH	3705.7	2538.55	3992.02	4045.27	0.77691	-0.364181	0.478874	down	no
ENST00000396856	ENSG00000111640	GAPDH	0	96.5991	0.827727	0.766827	60.5806	5.92078	0.00843749	up	yes
ENST00000396858	ENSG00000111640	GAPDH	4.64884	5.28075	1.22433	1.47224	3.68231	1.88061	0.153126	up	no
ENST00000396859	ENSG00000111640	GAPDH	52.7872	64.3917	45.047	33.7138	1.48778	0.573163	0.382027	up	no
ENST00000396861	ENSG00000111640	GAPDH	185.241	54.4825	53.2935	51.5831	2.28577	1.19268	0.0822823	up	no
ENST00000474249	ENSG00000111640	GAPDH	912.229	1754.6	765.166	708.886	1.80918	0.855336	0.154387	up	no
ENST00000496049	ENSG00000111640	GAPDH	3.53578	2.30951	1.12517	1.86205	1.95677	0.968471	0.50281	up	no
ENST00000322166	ENSG00000111641	NOP2	0	30.993	1.49499	6.36042	3.94543	1.98018	0.31567	up	no
ENST00000542919	ENSG00000111641	NOP2	1.33749	0.555737	1.48934	2.1846	0.515311	-0.956484	0.453235	down	no
ENST00000620535	ENSG00000111641	NOP2	15.8821	0.344094	15.7144	40.4098	0.289112	-1.7903	0.125128	down	no
ENST00000357008	ENSG00000111642	CHD4	10.9754	24.8422	4.16248	14.6064	1.90835	0.932328	0.209565	up	no
ENST00000642594	ENSG00000111642	CHD4	6.63028	16.1238	10.5812	3.00937	1.67426	0.74352	0.360646	up	no
ENST00000642879	ENSG00000111642	CHD4	10.0581	10.2507	31.9845	5.88739	0.536251	-0.899019	0.210341	down	no
ENST00000643815	ENSG00000111642	CHD4	0.770993	8.2783	3.07309	0.911719	2.27095	1.1833	0.338828	up	no
ENST00000645005	ENSG00000111642	CHD4	0.18141	0.087412	0.512332	0.091095	0.445492	-1.16653	0.390068	down	no
ENST00000645022	ENSG00000111642	CHD4	3.01215	3.01902	2.01788	0.483455	2.41118	1.26974	0.245879	up	no
ENST00000645645	ENSG00000111642	CHD4	2.41869	0.459242	14.3336	2.71152	0.168841	-2.56626	0.0118255	down	yes
ENST00000356828	ENSG00000111647	UHRF1BP1L	0.683473	0.44067	0.033753	0.44164	2.36466	1.24163	0.435074	up	no
ENST00000534947	ENSG00000111652	COPS7A	0.323464	0.7771	10.5378	28.9762	0.0278525	-5.16605	2.1628e-06	down	yes
ENST00000543155	ENSG00000111652	COPS7A	22.3655	28.0176	10.3071	10.8831	2.37766	1.24954	0.088403	up	no
ENST00000544316	ENSG00000111652	COPS7A	3.56795	1.82187	0.237954	0.266561	10.6832	3.41727	0.0287884	up	yes
ENST00000446105	ENSG00000111653	ING4	0.054496	1.04006	1.51315	1.53491	0.3591	-1.47754	0.314667	down	no
ENST00000549872	ENSG00000111666	CHPT1	3.24007	4.014	1.38721	1.99809	2.14282	1.09951	0.386005	up	no
ENST00000229268	ENSG00000111667	USP5	7.03873	9.1824	4.94	5.22694	1.59548	0.67399	0.443932	up	no
ENST00000537267	ENSG00000111667	USP5	0.206281	0.169298	0.51751	0.640888	0.324223	-1.62494	0.227065	down	no
ENST00000229270	ENSG00000111669	TPI1	46.9321	36.3894	21.1936	34.3466	1.5002	0.585155	0.375478	up	no
ENST00000396705	ENSG00000111669	TPI1	657.335	688.233	703.914	34.1266	1.82316	0.866444	0.385157	up	no
ENST00000535434	ENSG00000111669	TPI1	2.32572	1.96482	0.718478	69.7184	0.0609133	-4.0371	0.00465176	down	yes
ENST00000613953	ENSG00000111669	TPI1	131.869	93.4251	131.617	645.642	0.289857	-1.78659	0.0132636	down	yes
ENST00000229277	ENSG00000111674	ENO2	6.9369	7.1216	5.27885	28.5109	0.416058	-1.26514	0.154893	down	no
ENST00000541477	ENSG00000111674	ENO2	29.9766	21.959	15.2562	6.42711	2.39519	1.26014	0.0815993	up	no
ENST00000535479	ENSG00000111684	LPCAT3	0.532029	0.487672	0.75894	1.23639	0.511043	-0.968483	0.444685	down	no
ENST00000534981	ENSG00000111726	CMAS	0.488459	1.41857	1.77358	2.25588	0.47327	-1.07927	0.402106	down	no
ENST00000392839	ENSG00000111785	RIC8B	0.551198	1.27846	0.953121	3.57394	0.40416	-1.307	0.325374	down	no
ENST00000229395	ENSG00000111790	FGFR1OP2	6.47844	4.79874	3.05456	3.45236	1.73311	0.793361	0.442802	up	no
ENST00000244519	ENSG00000111801	BTN3A3	2.22553	0	3.15202	2.44955	0.397304	-1.33168	0.47939	down	no
ENST00000480110	ENSG00000111801	BTN3A3	0.353822	1.97023	0.205038	0.581727	2.95393	1.56264	0.281046	up	no
ENST00000534000	ENSG00000111907	TPD52L1	1.11795	2.75773	0.900201	1.02684	2.01121	1.00807	0.457519	up	no
ENST00000367230	ENSG00000112031	MTRF1L	0.565532	0.203389	0.793542	0.996426	0.429572	-1.21903	0.350045	down	no
ENST00000229795	ENSG00000112062	MAPK14	3.64027	6.13173	1.67095	3.76214	1.7986	0.846878	0.397399	up	no
ENST00000496250	ENSG00000112062	MAPK14	0.627338	0.878637	0.364277	0.288328	2.30764	1.20642	0.356322	up	no
ENST00000229854	ENSG00000112118	MCM3	0.34142	0.366326	0	0	inf	inf	0.00023143	up	yes
ENST00000469731	ENSG00000112130	RNF8	2.98652	2.56284	0	0.64525	8.60033	3.10439	0.104704	up	no
ENST00000465994	ENSG00000112186	CAP2	0	0.386711	0.696222	1.22725	0.201049	-2.31438	0.210952	down	no
ENST00000357489	ENSG00000112200	ZNF451	0.032076	0.580379	0.461668	1.15345	0.379203	-1.39896	0.353589	down	no
ENST00000444273	ENSG00000112200	ZNF451	1.44805	1.55664	0.426011	0.682719	2.71003	1.43831	0.275798	up	no
ENST00000326298	ENSG00000112237	CCNC	0.387876	0.73186	0	0	inf	inf	0.000190432	up	yes
ENST00000324696	ENSG00000112249	ASCC3	0	0.319521	0.598296	0.270609	0.367728	-1.44329	0.437938	down	no
ENST00000354577	ENSG00000112282	MED23	0.973293	0.2193	0.273102	0.186203	2.59652	1.37658	0.320709	up	no
ENST00000368060	ENSG00000112282	MED23	0.1869	0	0.942732	0.441893	0.134982	-2.88916	0.119691	down	no
ENST00000392587	ENSG00000112290	WASF1	1.88143	0	5.0855	1.63523	0.279945	-1.83678	0.338606	down	no
ENST00000392589	ENSG00000112290	WASF1	1.37054	4.14031	0	1.13375	4.86073	2.28117	0.247271	up	no
ENST00000348925	ENSG00000112294	ALDH5A1	0.062238	0.026935	0.800663	1.17808	0.0450654	-4.47184	0.00334381	down	yes
ENST00000356509	ENSG00000112312	GMNN	11.9911	14.0456	8.23158	6.25795	1.79693	0.845531	0.433309	up	no
ENST00000368979	ENSG00000112335	SNX3	0.342923	0.355861	1.06926	1.26752	0.299036	-1.74161	0.181302	down	no
ENST00000367826	ENSG00000112339	HBS1L	11.3462	2.66425	1.05997	6.45459	1.86444	0.898739	0.449266	up	no
ENST00000674532	ENSG00000112367	FIG4	0	0.484796	0.647862	1.45354	0.230701	-2.11591	0.264182	down	no
ENST00000674657	ENSG00000112367	FIG4	1.16956	0.214601	0.558135	0	2.47998	1.31033	0.502917	up	no
ENST00000675284	ENSG00000112367	FIG4	0.495643	1.08327	0.273834	0.104227	4.17635	2.06224	0.136884	up	no
ENST00000675552	ENSG00000112367	FIG4	0.071133	0.719389	0.094207	0.105715	3.95415	1.98337	0.190569	up	no
ENST00000675681	ENSG00000112367	FIG4	0.655335	0.491442	0.268731	0.126854	2.89894	1.53553	0.287216	up	no
ENST00000675714	ENSG00000112367	FIG4	1.724	1.12085	0.72432	0.688778	2.0132	1.00949	0.447677	up	no
ENST00000675726	ENSG00000112367	FIG4	0	0	1.01842	0.689098	-inf	-inf	7.15938e-06	down	yes
ENST00000462802	ENSG00000112514	CUTA	13.646	9.68439	10.4483	2.30958	1.8287	0.870821	0.481301	up	no
ENST00000465956	ENSG00000112514	CUTA	1.47989	1.25943	2.46405	4.25951	0.40742	-1.29541	0.307076	down	no
ENST00000372987	ENSG00000112576	CCND3	0.249527	0.069727	1.47025	1.25444	0.117171	-3.09331	0.0296435	down	yes
ENST00000372988	ENSG00000112576	CCND3	0.094124	0.038149	0.737384	2.59146	0.0397354	-4.65343	0.00308732	down	yes
ENST00000510503	ENSG00000112576	CCND3	1.1522	0.446055	1.82661	1.69369	0.454013	-1.13919	0.375038	down	no
ENST00000230354	ENSG00000112592	TBP	5.61622	5.67842	4.28045	2.01157	1.79508	0.844046	0.483685	up	no
ENST00000470467	ENSG00000112640	PPP2R5D	0.563797	0.245495	0.640934	0.861471	0.538664	-0.892542	0.475766	down	no
ENST00000349241	ENSG00000112655	PTK7	0.948511	1.09746	0.409354	4.17297	0.446493	-1.16329	0.385381	down	no
ENST00000487673	ENSG00000112655	PTK7	2.90321	0.715481	1.16044	13.4848	0.24709	-2.01689	0.0742256	down	no
ENST00000252050	ENSG00000112659	CUL9	0.4997	0.368924	1.84103	0.199279	0.425732	-1.23198	0.358975	down	no
ENST00000370081	ENSG00000112695	COX7A2	0.006611	16.115	2.34954	0	6.8616	2.77855	0.273846	up	no
ENST00000472311	ENSG00000112695	COX7A2	1.64025	5.90459	0	2.91218	2.59079	1.37339	0.489871	up	no
ENST00000509698	ENSG00000112695	COX7A2	6.24343	8.84193	43.4824	33.9511	0.194817	-2.35981	0.0288146	down	yes
ENST00000370010	ENSG00000112701	SENP6	3.06905	2.05781	7.42415	4.73022	0.421812	-1.24533	0.148154	down	no
ENST00000447266	ENSG00000112701	SENP6	9.88522	11.3814	6.54032	8.29163	1.43383	0.519879	0.425263	up	no
ENST00000481109	ENSG00000112739	PRPF4B	0.693182	0.98815	0.227126	0.606511	2.01686	1.01211	0.450592	up	no
ENST00000509894	ENSG00000112742	TTK	2.11827	1.6933	1.06315	0.934834	1.9077	0.931838	0.462226	up	no
ENST00000371708	ENSG00000112759	SLC29A1	0.132305	2.40225	2.97583	6.74681	0.260686	-1.93962	0.178725	down	no
ENST00000393844	ENSG00000112759	SLC29A1	5.11897	5.81112	9.56538	23.5431	0.330129	-1.5989	0.0558017	down	no
ENST00000472176	ENSG00000112759	SLC29A1	2.00016	2.7003	0.721808	0.958184	2.7979	1.48435	0.264343	up	no
ENST00000651428	ENSG00000112759	SLC29A1	23.3724	18.785	14.9207	0.855115	2.67228	1.41807	0.18285	up	no
ENST00000380943	ENSG00000112851	ERBIN	14.628	8.32715	5.46847	7.55668	1.76237	0.817518	0.222195	up	no
ENST00000511297	ENSG00000112851	ERBIN	0.320702	0.830349	3.9147	6.37617	0.111852	-3.16034	0.00522358	down	yes
ENST00000642452	ENSG00000112855	HARS2	3.06964	0	0.444063	0	6.91263	2.78923	0.290843	up	no
ENST00000433297	ENSG00000112972	HMGCS1	2.51021	3.47987	4.86586	6.2702	0.5379	-0.894591	0.337199	down	no
ENST00000230901	ENSG00000112983	BRD8	2.26965	1.1861	3.71366	3.98055	0.449137	-1.15477	0.297465	down	no
ENST00000254900	ENSG00000112983	BRD8	0.19913	0.265268	0.060773	0.107159	2.76539	1.46748	0.318957	up	no
ENST00000402931	ENSG00000112983	BRD8	0.381711	0.330703	2.87602	0.769172	0.19544	-2.35521	0.0872326	down	no
ENST00000457646	ENSG00000113048	MRPS27	13.1369	5.61127	2.55597	9.26766	1.58565	0.665078	0.504604	up	no
ENST00000642225	ENSG00000113163	CERT1	0	0	0.854643	1.12409	-inf	-inf	4.73791e-06	down	yes
ENST00000645483	ENSG00000113163	CERT1	0.353774	1.39152	0.214401	0.322825	3.24871	1.69987	0.223946	up	no
ENST00000645866	ENSG00000113163	CERT1	0	3.05906	0.244961	0	12.488	3.64246	0.186979	up	no
ENST00000316308	ENSG00000113240	CLK4	0.148166	0	0.722146	0.507114	0.120533	-3.0525	0.101099	down	no
ENST00000521621	ENSG00000113240	CLK4	0.899615	1.71125	0.120093	0.477521	4.36882	2.12724	0.137391	up	no
ENST00000522136	ENSG00000113240	CLK4	0.842684	2.25556	0.838285	0.621421	2.12251	1.08577	0.429805	up	no
ENST00000411809	ENSG00000113282	CLINT1	15.0704	14.6237	5.1481	5.62742	2.7557	1.46242	0.03449	up	yes
ENST00000518855	ENSG00000113282	CLINT1	1.18444	0.594841	1.99512	1.62977	0.49085	-1.02665	0.407285	down	no
ENST00000523094	ENSG00000113282	CLINT1	0	0	5.36281	6.42308	-inf	-inf	2.05748e-11	down	yes
ENST00000523908	ENSG00000113282	CLINT1	4.49515	15.4308	25.0958	23.1516	0.412996	-1.2758	0.0851832	down	no
ENST00000530742	ENSG00000113282	CLINT1	10.8303	5.51598	3.62108	4.2371	2.08016	1.05669	0.242791	up	no
ENST00000618123	ENSG00000113300	CNOT6	0.011243	4.68481	6.58075	4.68516	0.416838	-1.26244	0.376864	down	no
ENST00000399107	ENSG00000113356	POLR3G	0.851062	2.94259	0.499969	0.773361	2.97931	1.57498	0.253126	up	no
ENST00000504788	ENSG00000113368	LMNB1	0	0	5.53668	1.01221	-inf	-inf	5.06114e-06	down	yes
ENST00000509163	ENSG00000113391	FAM172A	0.621524	1.481	0.426162	0	4.93363	2.30265	0.231806	up	no
ENST00000503422	ENSG00000113407	TARS1	2.45383	2.11248	0.630584	0.539162	3.90368	1.96484	0.158668	up	no
ENST00000515011	ENSG00000113448	PDE4D	0.366202	0.431764	0.822447	0.765534	0.502503	-0.992794	0.410013	down	no
ENST00000325577	ENSG00000113456	RAD1	2.99403	4.31981	2.59319	0	2.82041	1.4959	0.446031	up	no
ENST00000515798	ENSG00000113460	BRIX1	0.603494	0.854042	0.22683	0.534838	1.91361	0.936297	0.487464	up	no
ENST00000533482	ENSG00000113522	RAD50	3.89281	0.986274	0.002698	0.777456	6.25399	2.64478	0.147584	up	no
ENST00000500692	ENSG00000113552	GNPDA1	6.98292	10.836	0	4.79647	3.71501	1.89337	0.303622	up	no
ENST00000503794	ENSG00000113552	GNPDA1	6.58806	0.143698	17.0956	6.34098	0.287233	-1.7997	0.168867	down	no
ENST00000508177	ENSG00000113552	GNPDA1	5.44764	8.75116	11.8397	10.6176	0.632259	-0.661413	0.366497	down	no
ENST00000523966	ENSG00000113558	SKP1	0.178511	0	10.9651	6.01505	0.0105129	-6.57169	0.000577096	down	yes
ENST00000535264	ENSG00000113593	PPWD1	4.29356	0	0.007274	0.9873	4.31699	2.11003	0.379451	up	no
ENST00000438419	ENSG00000113597	TRAPPC13	0.863446	0.69219	1.82991	1.40676	0.480629	-1.05701	0.393907	down	no
ENST00000521089	ENSG00000113645	WWC1	7.48238	9.75634	6.16209	5.51264	1.47659	0.562265	0.495601	up	no
ENST00000524228	ENSG00000113645	WWC1	0.402688	0.250995	0.055614	0.082141	4.74526	2.24649	0.135671	up	no
ENST00000360597	ENSG00000113648	MACROH2A1	0.698201	0	0.857342	2.45129	0.211024	-2.24452	0.228139	down	no
ENST00000394421	ENSG00000113649	TCERG1	1.73122	5.72811	1.54644	1.43977	2.49793	1.32073	0.269986	up	no
ENST00000549332	ENSG00000113649	TCERG1	0	6.08336	7.3915	9.8904	0.352008	-1.50632	0.378444	down	no
ENST00000545279	ENSG00000113658	SMAD5	9.55396	7.30045	1.10243	7.28708	2.00899	1.00647	0.243902	up	no
ENST00000545620	ENSG00000113658	SMAD5	4.01157	6.37426	12.886	6.76279	0.528574	-0.919824	0.157259	down	no
ENST00000613459	ENSG00000113716	HMGXB3	0	0	0.290313	0.803361	-inf	-inf	7.28481e-06	down	yes
ENST00000519835	ENSG00000113742	CPEB4	0	0.353969	0.338245	0.567149	0.390956	-1.35492	0.458217	down	no
ENST00000657000	ENSG00000113742	CPEB4	0.006609	0	1.49091	1.41285	0.00227601	-8.77928	3.06168e-05	down	yes
ENST00000393565	ENSG00000113758	DBN1	1.26264	0.144282	0.454548	0.055079	2.76069	1.46503	0.354428	up	no
ENST00000472831	ENSG00000113758	DBN1	3.65267	13.624	11.1762	17.7528	0.59721	-0.74369	0.347847	down	no
ENST00000462668	ENSG00000113810	SMC4	6.0003	1.12411	2.08267	1.698	1.88443	0.914128	0.43522	up	no
ENST00000424280	ENSG00000113838	TBCCD1	2.37834	1.37592	2.96932	4.00765	0.538094	-0.894071	0.424992	down	no
ENST00000264244	ENSG00000113845	TIMMDC1	0	0	2.12451	0.776822	-inf	-inf	6.33245e-05	down	yes
ENST00000424814	ENSG00000113851	CRBN	0.795562	1.13168	0	0	inf	inf	3.85405e-05	up	yes
ENST00000432408	ENSG00000113851	CRBN	0.855591	0.768661	0.673886	0	2.41028	1.2692	0.49941	up	no
ENST00000450014	ENSG00000113851	CRBN	1.01215	0.335175	2.52153	1.27393	0.354982	-1.49418	0.285738	down	no
ENST00000232014	ENSG00000113916	BCL6	0	0	1.03259	0.542277	-inf	-inf	3.42716e-05	down	yes
ENST00000422605	ENSG00000114019	AMOTL2	4.53971	3.2279	1.05957	3.32254	1.77257	0.825844	0.44447	up	no
ENST00000302003	ENSG00000114026	OGG1	0.719354	1.7169	0	0.714895	3.40785	1.76886	0.339819	up	no
ENST00000625778	ENSG00000114062	UBE3A	1.16692	0.388988	0.202967	0.260134	3.35976	1.74836	0.204386	up	no
ENST00000638155	ENSG00000114062	UBE3A	0.135148	0.128611	0	0.104403	2.52635	1.33706	0.482145	up	no
ENST00000649550	ENSG00000114062	UBE3A	1.76961	0.625791	0.10217	0.109657	11.3083	3.49931	0.0155462	up	yes
ENST00000650110	ENSG00000114062	UBE3A	4.33556	1.14414	0	0.342968	15.9773	3.99795	0.0396653	up	yes
ENST00000491704	ENSG00000114098	ARMC8	3.11047	0.823828	0	0.440269	8.93613	3.15965	0.109239	up	no
ENST00000484888	ENSG00000114107	CEP70	0.074203	2.36114	0.219114	0.51024	3.33904	1.73943	0.292839	up	no
ENST00000477012	ENSG00000114125	RNF7	4.47347	4.06207	0	3.23693	2.63692	1.39885	0.470803	up	no
ENST00000499676	ENSG00000114126	TFDP2	0.003866	0.133971	0.388892	0.082613	0.292334	-1.77431	0.268364	down	no
ENST00000264951	ENSG00000114127	XRN1	4.09459	3.8417	5.71476	5.92382	0.681895	-0.552378	0.360012	down	no
ENST00000392981	ENSG00000114127	XRN1	3.39029	3.95292	0.799298	1.4564	3.2554	1.70284	0.10616	up	no
ENST00000472697	ENSG00000114127	XRN1	0.405861	1.50031	0.206962	0.042404	7.64406	2.93434	0.0535472	up	no
ENST00000392750	ENSG00000114209	PDCD10	2.60407	4.21159	2.25548	0.752411	2.26592	1.1801	0.375735	up	no
ENST00000470131	ENSG00000114209	PDCD10	0	1.28705	0.745615	8.24386	0.143173	-2.80416	0.16465	down	no
ENST00000351842	ENSG00000114316	USP4	5.16075	3.13979	8.62065	7.34809	0.519799	-0.943974	0.269982	down	no
ENST00000485450	ENSG00000114316	USP4	1.41563	0.426776	0.139787	0.129805	6.83406	2.77274	0.0502859	up	no
ENST00000437296	ENSG00000114346	ECT2	0.42342	0.172284	1.27822	0.34814	0.36628	-1.44898	0.282819	down	no
ENST00000490574	ENSG00000114354	TFG	0.703955	2.18106	0	0	inf	inf	1.15736e-05	up	yes
ENST00000674645	ENSG00000114354	TFG	3.66991	0.113393	6.4922	2.46671	0.422295	-1.24368	0.405518	down	no
ENST00000675047	ENSG00000114354	TFG	0.481729	1.77953	0	0	inf	inf	6.54149e-05	up	yes
ENST00000675243	ENSG00000114354	TFG	1.5155	1.39346	0	0	inf	inf	5.8693e-06	up	yes
ENST00000675420	ENSG00000114354	TFG	2.15924	2.65718	0	0	inf	inf	2.20659e-06	up	yes
ENST00000675553	ENSG00000114354	TFG	0	0	0.625124	0.702258	-inf	-inf	0.000150544	down	yes
ENST00000676431	ENSG00000114354	TFG	0	0	0.479852	0.499921	-inf	-inf	0.000373863	down	yes
ENST00000479512	ENSG00000114388	NPRL2	0	0	1.19007	1.54007	-inf	-inf	6.10616e-06	down	yes
ENST00000305586	ENSG00000114416	FXR1	0.236149	2.69657	0.415516	0.203256	4.73957	2.24476	0.148988	up	no
ENST00000357559	ENSG00000114416	FXR1	3.93676	6.43544	4.15911	2.68062	1.51646	0.600711	0.426718	up	no
ENST00000445140	ENSG00000114416	FXR1	18.1718	12.0474	15.3718	33.782	0.614789	-0.701838	0.287494	down	no
ENST00000360370	ENSG00000114544	SLC41A3	1.13945	0.738524	2.72608	1.74249	0.420263	-1.25064	0.322253	down	no
ENST00000265565	ENSG00000114650	SCAP	8.28539	10.2829	6.90511	0	2.68907	1.42711	0.425736	up	no
ENST00000648151	ENSG00000114650	SCAP	0.227354	0.250831	0.220514	5.70678	0.0806752	-3.63173	0.0223807	down	yes
ENST00000383366	ENSG00000114670	NEK11	0.233467	0	0.57862	0.739927	0.177064	-2.49766	0.18249	down	no
ENST00000264995	ENSG00000114686	MRPL3	71.4801	82.0757	67.394	43.5962	1.38351	0.46833	0.450997	up	no
ENST00000425847	ENSG00000114686	MRPL3	3.31782	1.92195	7.21385	33.3174	0.129277	-2.95146	0.00686732	down	yes
ENST00000511168	ENSG00000114686	MRPL3	1.56668	3.63666	1.2341	1.10501	2.2245	1.15348	0.397957	up	no
ENST00000621469	ENSG00000114738	MAPKAPK3	11.35	7.06519	4.77792	4.64041	1.95525	0.967353	0.30572	up	no
ENST00000461232	ENSG00000114739	ACVR2B	0.079564	0.090165	0.173749	0.157429	0.512501	-0.964374	0.483236	down	no
ENST00000319283	ENSG00000114745	GORASP1	4.04331	4.70115	1.82077	3.43714	1.66311	0.733882	0.485156	up	no
ENST00000452389	ENSG00000114745	GORASP1	1.69226	1.37599	1.02674	0.559606	1.93417	0.951711	0.472738	up	no
ENST00000453680	ENSG00000114745	GORASP1	0.899312	1.72091	5.63521	2.89592	0.307136	-1.70305	0.14674	down	no
ENST00000361143	ENSG00000114779	ABHD14B	0.27621	0	1.96966	11.3705	0.0207051	-5.59387	0.00511139	down	yes
ENST00000395008	ENSG00000114779	ABHD14B	14.7307	10.4871	6.52794	1.70263	3.06391	1.61538	0.132444	up	no
ENST00000461108	ENSG00000114779	ABHD14B	0.539496	0.417747	3.62823	1.23819	0.196703	-2.34591	0.0840035	down	no
ENST00000242810	ENSG00000114796	KLHL24	0	0	1.84668	2.13475	-inf	-inf	1.05176e-08	down	yes
ENST00000454652	ENSG00000114796	KLHL24	1.64418	1.63576	0	0	inf	inf	4.73491e-08	up	yes
ENST00000476808	ENSG00000114796	KLHL24	0.605813	0.626003	0.033189	0.064788	12.5725	3.6522	0.0238387	up	yes
ENST00000447496	ENSG00000114805	PLCH1	0.022587	0.485527	1.00826	1.26578	0.223441	-2.16204	0.152296	down	no
ENST00000460012	ENSG00000114805	PLCH1	1.06173	0.499283	0.280682	0.275745	2.80542	1.48821	0.264912	up	no
ENST00000232978	ENSG00000114857	NKTR	6.48684	7.80595	9.8902	9.57134	0.734412	-0.445339	0.434605	down	no
ENST00000468735	ENSG00000114857	NKTR	1.68226	1.26856	0.43236	0.512506	3.12301	1.64294	0.170155	up	no
ENST00000650387	ENSG00000114861	FOXP1	2.72611	0.18301	1.20665	0.151232	2.1424	1.09922	0.503127	up	no
ENST00000342981	ENSG00000114867	EIF4G1	0.827058	0.465679	2.63328	0.829478	0.373326	-1.42149	0.24895	down	no
ENST00000414031	ENSG00000114867	EIF4G1	14.5953	9.27442	5.66747	5.78087	2.085	1.06004	0.116282	up	no
ENST00000676453	ENSG00000114867	EIF4G1	0.515081	0.224396	2.5174	0	0.293746	-1.76736	0.385723	down	no
ENST00000619898	ENSG00000114902	SPCS1	3.20968	0.984195	0.429986	1.41413	2.27419	1.18535	0.378086	up	no
ENST00000236957	ENSG00000114942	EEF1B2	20.2489	27.4843	59.5059	61.4343	0.394685	-1.34123	0.0495877	down	yes
ENST00000392221	ENSG00000114942	EEF1B2	126.19	177.952	183.764	224.016	0.745846	-0.42305	0.418623	down	no
ENST00000629438	ENSG00000114956	DGUOK	4.0003	5.50616	7.34837	9.44562	0.566063	-0.820965	0.473455	down	no
ENST00000431828	ENSG00000114982	KANSL3	3.55704	2.35359	3.53697	8.29306	0.499629	-1.00107	0.233527	down	no
ENST00000666923	ENSG00000114982	KANSL3	0.889828	0.229245	0	0.016349	68.449	6.09696	0.00132868	up	yes
ENST00000434524	ENSG00000114988	LMAN2L	0.035203	0.674958	0.841169	1.09963	0.365912	-1.45043	0.324843	down	no
ENST00000233330	ENSG00000114993	RTKN	1.55847	0	3.49655	1.21365	0.330871	-1.59566	0.404304	down	no
ENST00000305557	ENSG00000114993	RTKN	0	0.145841	0.500785	1.27058	0.0823325	-3.60239	0.0477045	down	yes
ENST00000470100	ENSG00000115042	FAHD2A	0.495752	0.943499	1.4058	1.31256	0.529456	-0.917417	0.485367	down	no
ENST00000454824	ENSG00000115053	NCL	4.92867	10.9725	26.4447	3.16419	0.537039	-0.896902	0.485638	down	no
ENST00000461347	ENSG00000115053	NCL	1.41147	6.12528	2.73286	1.1043	1.96415	0.973904	0.420305	up	no
ENST00000393107	ENSG00000115107	STEAP3	4.3441	3.71331	2.89314	0.861708	2.14587	1.10156	0.406968	up	no
ENST00000393110	ENSG00000115107	STEAP3	1.57079	8.01587	5.16809	10.2827	0.620466	-0.688577	0.429963	down	no
ENST00000470074	ENSG00000115183	TANC1	0.059135	0.042838	0.211787	0.20899	0.242345	-2.04487	0.164508	down	no
ENST00000264720	ENSG00000115207	GTF3C2	16.8771	15.2539	10.837	9.69905	1.56462	0.645812	0.331289	up	no
ENST00000359541	ENSG00000115207	GTF3C2	0.143994	0.086964	4.62812	6.0923	0.0215438	-5.53659	1.35721e-05	down	yes
ENST00000347454	ENSG00000115211	EIF2B4	1.31716	1.42716	5.15057	3.29212	0.325053	-1.62125	0.194907	down	no
ENST00000427123	ENSG00000115234	SNX17	2.14112	4.17651	0.481005	2.71116	1.9791	0.984846	0.479867	up	no
ENST00000593052	ENSG00000115268	RPS15	0	0	40.4696	62.1412	-inf	-inf	9.37525e-14	down	yes
ENST00000410003	ENSG00000115282	TTC31	0.330987	0.357798	0.181838	0.159874	2.01569	1.01127	0.480725	up	no
ENST00000424122	ENSG00000115282	TTC31	2.49484	0.594945	0.183457	0.248029	7.16079	2.84012	0.0515261	up	no
ENST00000357732	ENSG00000115310	RTN4	1.79178	2.104	1.07005	0.559521	2.39067	1.25742	0.346939	up	no
ENST00000263630	ENSG00000115355	CCDC88A	1.594	3.53427	1.40334	0.768085	2.36171	1.23983	0.210369	up	no
ENST00000336838	ENSG00000115355	CCDC88A	1.1238	0	1.03679	2.12914	0.354966	-1.49425	0.417079	down	no
ENST00000642200	ENSG00000115355	CCDC88A	0.154561	0.255887	0	0.087344	4.69921	2.23242	0.236574	up	no
ENST00000643413	ENSG00000115355	CCDC88A	1.14017	0	1.09333	2.39874	0.326502	-1.61483	0.381426	down	no
ENST00000645860	ENSG00000115355	CCDC88A	0.749776	1.07651	0.284261	0.431809	2.55043	1.35074	0.313906	up	no
ENST00000646796	ENSG00000115355	CCDC88A	0.082871	0	0.389215	0.162803	0.150124	-2.73578	0.146829	down	no
ENST00000427960	ENSG00000115368	WDR75	0.953809	4.37711	0.825489	1.20136	2.63015	1.39515	0.277544	up	no
ENST00000402135	ENSG00000115392	FANCL	2.69786	0.99381	0.185336	0.332724	7.12596	2.83308	0.0464122	up	yes
ENST00000361099	ENSG00000115415	STAT1	14.2142	11.426	16.5701	17.9173	0.743465	-0.427662	0.456113	down	no
ENST00000409465	ENSG00000115415	STAT1	0.590895	0.830738	0.564275	2.44809	0.471933	-1.08335	0.414369	down	no
ENST00000673859	ENSG00000115415	STAT1	0.60089	0.660529	0.064817	0.556051	2.0317	1.02269	0.497147	up	no
ENST00000673952	ENSG00000115415	STAT1	1.41108	0.866001	0.291167	0.544824	2.7238	1.44562	0.284782	up	no
ENST00000409013	ENSG00000115459	ELMOD3	0	0.691268	1.43963	0.795606	0.30926	-1.69311	0.352473	down	no
ENST00000544079	ENSG00000115484	CCT4	0.285158	0.526174	0.551895	2.56569	0.260243	-1.94207	0.16298	down	no
ENST00000470268	ENSG00000115524	SF3B1	0.199549	9.38321	0.554133	0.076101	15.2051	3.92648	0.0104863	up	yes
ENST00000652026	ENSG00000115524	SF3B1	0.827695	3.10232	8.58745	1.92059	0.374001	-1.41888	0.111818	down	no
ENST00000411696	ENSG00000115568	ZNF142	0	0.03972	0.387487	0.41885	0.0492598	-4.34345	0.0158847	down	yes
ENST00000391976	ENSG00000115677	HDLBP	10.2043	8.86056	15.7422	22.4094	0.499714	-1.00082	0.0945426	down	no
ENST00000404405	ENSG00000115685	PPP1R7	0.906009	4.10812	0.532341	0.718102	4.00989	2.00356	0.154945	up	no
ENST00000234040	ENSG00000115687	PASK	1.93436	4.39116	2.22397	1.24204	1.82502	0.867909	0.444809	up	no
ENST00000472072	ENSG00000115687	PASK	0.738327	0.954554	0.276767	0.595361	1.94109	0.956869	0.463366	up	no
ENST00000316586	ENSG00000115694	STK25	9.38802	8.9807	5.56895	3.83899	1.95247	0.965301	0.199576	up	no
ENST00000487962	ENSG00000115694	STK25	2.78647	3.28103	6.2882	8.22083	0.418188	-1.25778	0.232548	down	no
ENST00000535007	ENSG00000115694	STK25	4.76028	0.898485	10.2908	3.3199	0.415757	-1.26619	0.275169	down	no
ENST00000307845	ENSG00000115756	HPCAL1	9.92578	0	12.6233	11.592	0.409898	-1.28666	0.468249	down	no
ENST00000381765	ENSG00000115756	HPCAL1	0.674767	1.59069	0	0.648099	3.49554	1.80552	0.331235	up	no
ENST00000471232	ENSG00000115760	BIRC6	0.071994	0.150873	0.898541	0.406534	0.170769	-2.54988	0.061728	down	no
ENST00000409279	ENSG00000115762	PLEKHB2	0.000199	0.471331	2.79426	0.804623	0.131021	-2.93213	0.0988987	down	no
ENST00000439822	ENSG00000115762	PLEKHB2	2.64952	0	4.41232	4.88312	0.285035	-1.81079	0.313676	down	no
ENST00000263812	ENSG00000115840	SLC25A12	0	0	0.430155	0.417507	-inf	-inf	0.000259958	down	yes
ENST00000425941	ENSG00000115875	SRSF7	3.17932	0.568183	0.616511	0.554749	3.19955	1.67787	0.241364	up	no
ENST00000446327	ENSG00000115875	SRSF7	9.64432	3.06792	3.41261	3.6804	1.79222	0.841748	0.444984	up	no
ENST00000395038	ENSG00000115904	SOS1	0.405912	0.254954	1.87668	0.766376	0.250038	-1.99978	0.132166	down	no
ENST00000264169	ENSG00000115947	ORC4	0.002016	0.230876	0.001045	0.636581	0.365249	-1.45305	0.482029	down	no
ENST00000375734	ENSG00000115963	RND3	1.42176	1.79899	0.625142	0.664902	2.49663	1.31998	0.319418	up	no
ENST00000264110	ENSG00000115966	ATF2	1.83624	1.86698	4.38441	4.78655	0.403798	-1.30829	0.178164	down	no
ENST00000345739	ENSG00000115966	ATF2	4.06723	3.68009	1.79107	2.01863	2.03358	1.02402	0.331822	up	no
ENST00000405006	ENSG00000115970	THADA	0.740303	0.01262	2.67871	0.08021	0.272904	-1.87353	0.2986	down	no
ENST00000405975	ENSG00000115970	THADA	3.38414	4.46036	1.34412	3.60569	1.58481	0.664307	0.486211	up	no
ENST00000420306	ENSG00000115998	C2orf42	2.19807	0.698452	0.402116	0	7.20321	2.84864	0.135674	up	no
ENST00000445503	ENSG00000116062	MSH6	0.374476	0.933509	0.978534	1.7155	0.485512	-1.04242	0.408311	down	no
ENST00000614496	ENSG00000116062	MSH6	0.863589	0.336412	0.933424	1.70585	0.45467	-1.13711	0.378111	down	no
ENST00000620466	ENSG00000116127	ALMS1	0.39958	0.425445	0.105046	0.065863	4.82728	2.27121	0.0918268	up	no
ENST00000535035	ENSG00000116133	DHCR24	0.051141	9.31981	4.91756	14.0871	0.493086	-1.02009	0.445684	down	no
ENST00000648728	ENSG00000116133	DHCR24	0.802728	1.50627	0.272383	0.931083	1.91863	0.940074	0.498081	up	no
ENST00000649769	ENSG00000116133	DHCR24	0.705561	0.273433	3.84512	0.585364	0.220968	-2.17809	0.107566	down	no
ENST00000613570	ENSG00000116161	CACYBP	7.92137	0.808139	7.74457	8.56067	0.535381	-0.901363	0.40103	down	no
ENST00000478631	ENSG00000116171	SCP2	0	0	0.404436	0.364566	-inf	-inf	3.37805e-05	down	yes
ENST00000428079	ENSG00000116198	CEP104	0.232844	1.00907	2.43208	3.05815	0.226205	-2.1443	0.104777	down	no
ENST00000675375	ENSG00000116198	CEP104	0.230653	1.07809	0	0.353107	3.70636	1.89	0.335522	up	no
ENST00000605337	ENSG00000116221	MRPL37	4.51633	0.93142	27.5107	0.68469	0.193214	-2.37173	0.103581	down	no
ENST00000377493	ENSG00000116288	PARK7	12.8393	4.11496	1.11126	1.51762	6.44926	2.68913	0.0549659	up	no
ENST00000460192	ENSG00000116288	PARK7	8.44674	9.73111	0.094275	3.59506	4.92713	2.30075	0.162216	up	no
ENST00000469225	ENSG00000116288	PARK7	1.30603	6.26351	0	0.22353	33.8636	5.08166	0.00724182	up	yes
ENST00000493678	ENSG00000116288	PARK7	26.3067	19.5846	51.2713	38.4441	0.511521	-0.967136	0.151122	down	no
ENST00000369939	ENSG00000116299	ELAPOR1	0.218526	0.199114	0.124558	0.049878	2.39423	1.25956	0.383909	up	no
ENST00000256578	ENSG00000116337	AMPD2	0.481009	0.736178	2.46758	0.676469	0.387141	-1.36907	0.291896	down	no
ENST00000476688	ENSG00000116337	AMPD2	4.79445	3.93696	2.30628	2.40038	1.85512	0.89151	0.497276	up	no
ENST00000654851	ENSG00000116337	AMPD2	0.601302	1.73348	0.628398	0.164809	2.94347	1.55752	0.282794	up	no
ENST00000373795	ENSG00000116350	SRSF4	26.503	24.5712	34.011	41.4133	0.677158	-0.562436	0.322319	down	no
ENST00000634348	ENSG00000116350	SRSF4	5.94004	5.55681	3.60929	1.71662	2.15866	1.11014	0.142939	up	no
ENST00000263702	ENSG00000116353	MECR	4.30758	3.05124	1.5492	2.04016	2.05017	1.03575	0.39558	up	no
ENST00000373791	ENSG00000116353	MECR	0.006489	1.85085	3.34082	2.3149	0.3284	-1.60647	0.33666	down	no
[truncated: 4,901 more rows]

## Sheet: m6a_peaks
transcriptId	geneId	geneName	fold_enrichment	annotation
ENST00000472795	ENSG00000000460	C1orf112	20.2	3' UTR
ENST00000498289	ENSG00000000460	C1orf112	6.98	Exon (ENST00000498289/ENSG00000000460, exon 1 of 29)
ENST00000504525	ENSG00000001084	GCLC	11	5' UTR
ENST00000515580	ENSG00000001084	GCLC	5.07	3' UTR
ENST00000435187	ENSG00000001460	STPG1	17.9	Exon (ENST00000483261/ENSG00000001460, exon 2 of 2)
ENST00000438866	ENSG00000001460	STPG1	5.98	3' UTR
ENST00000438866	ENSG00000001460	STPG1	7.98	3' UTR
ENST00000438866	ENSG00000001460	STPG1	15.4	3' UTR
ENST00000468303	ENSG00000001460	STPG1	2.42	5' UTR
ENST00000498488	ENSG00000001460	STPG1	11	Exon (ENST00000468303/ENSG00000001460, exon 1 of 10)
ENST00000432012	ENSG00000001461	NIPAL3	5.09	3' UTR
ENST00000475663	ENSG00000001461	NIPAL3	13	5' UTR
ENST00000321037	ENSG00000001561	ENPP4	5.98	3' UTR
ENST00000321037	ENSG00000001561	ENPP4	10.5	3' UTR
ENST00000465883	ENSG00000001629	ANKIB1	6.32	3' UTR
ENST00000486698	ENSG00000001629	ANKIB1	11	3' UTR
ENST00000450723	ENSG00000001630	CYP51A1	11	Exon (ENST00000453068/ENSG00000188693, exon 1 of 5)
ENST00000394505	ENSG00000001631	KRIT1	7.48	5' UTR
ENST00000444960	ENSG00000001631	KRIT1	4.76	5' UTR
ENST00000487168	ENSG00000001631	KRIT1	2.03	3' UTR
ENST00000487168	ENSG00000001631	KRIT1	2.99	3' UTR
ENST00000430095	ENSG00000002016	RAD52	2.43	5' UTR
ENST00000430095	ENSG00000002016	RAD52	10.9	5' UTR
ENST00000542297	ENSG00000002016	RAD52	2.07	3' UTR
ENST00000542297	ENSG00000002016	RAD52	12	3' UTR
ENST00000425880	ENSG00000002079	MYH16	17.9	Exon (ENST00000439784/ENSG00000002079, exon 12 of 42)
ENST00000425880	ENSG00000002079	MYH16	29.9	Exon (ENST00000638785/ENSG00000284523, exon 4 of 4)
ENST00000429079	ENSG00000002079	MYH16	8.97	Exon (ENST00000439784/ENSG00000002079, exon 42 of 42)
ENST00000452010	ENSG00000002079	MYH16	8.97	Exon (ENST00000439784/ENSG00000002079, exon 34 of 42)
ENST00000381177	ENSG00000002586	CD99	8.97	3' UTR
ENST00000611428	ENSG00000002586	CD99	4.11	Exon (ENST00000435581/ENSG00000223773, exon 9 of 9)
ENST00000611428	ENSG00000002586	CD99	11	Exon (ENST00000435581/ENSG00000223773, exon 9 of 9)
ENST00000461842	ENSG00000002746	HECW1	8.18	Exon (ENST00000453890/ENSG00000002746, exon 10 of 28)
ENST00000399654	ENSG00000002822	MAD1L1	7.13	3' UTR
ENST00000406869	ENSG00000002822	MAD1L1	7.35	3' UTR
ENST00000464742	ENSG00000002822	MAD1L1	5.98	3' UTR
ENST00000468372	ENSG00000002822	MAD1L1	6.48	3' UTR
ENST00000468372	ENSG00000002822	MAD1L1	7.98	3' UTR
ENST00000577310	ENSG00000002919	SNX11	2.79	3' UTR
ENST00000544193	ENSG00000003056	M6PR	14.4	3' UTR
ENST00000623401	ENSG00000003249	DBNDD1	3.49	3' UTR
ENST00000264276	ENSG00000003393	ALS2	12	5' UTR
ENST00000439495	ENSG00000003393	ALS2	3.81	3' UTR
ENST00000340870	ENSG00000003402	CFLAR	5.98	3' UTR
ENST00000439154	ENSG00000003402	CFLAR	2.29	5' UTR
ENST00000443227	ENSG00000003402	CFLAR	14.6	5' UTR
ENST00000457277	ENSG00000003402	CFLAR	2.3	5' UTR
ENST00000474842	ENSG00000003402	CFLAR	24.9	3' UTR
ENST00000481132	ENSG00000003436	TFPI	8.48	Exon (ENST00000481132/ENSG00000003436, exon 1 of 7)
ENST00000481132	ENSG00000003436	TFPI	16	Exon (ENST00000481132/ENSG00000003436, exon 1 of 7)
ENST00000481132	ENSG00000003436	TFPI	19.9	Exon (ENST00000481132/ENSG00000003436, exon 1 of 7)
ENST00000441905	ENSG00000003509	NDUFAF7	3.99	3' UTR
ENST00000441905	ENSG00000003509	NDUFAF7	8.95	3' UTR
ENST00000463733	ENSG00000004059	ARF5	24.3	3' UTR
ENST00000618887	ENSG00000004142	POLDIP2	3.12	3' UTR
ENST00000501038	ENSG00000004399	PLXND1	10.7	3' UTR
ENST00000482191	ENSG00000004455	AK2	3.13	3' UTR
ENST00000482191	ENSG00000004455	AK2	17.9	3' UTR
ENST00000481879	ENSG00000004487	KDM1A	5.98	3' UTR
ENST00000602503	ENSG00000004487	KDM1A	3.11	3' UTR
ENST00000421682	ENSG00000004534	RBM6	3.99	3' UTR
ENST00000442092	ENSG00000004534	RBM6	4.27	5' UTR
ENST00000464013	ENSG00000004534	RBM6	18.3	5' UTR
ENST00000488807	ENSG00000004534	RBM6	6.73	5' UTR
ENST00000573483	ENSG00000004660	CAMKK1	6.98	Exon (ENST00000573483/ENSG00000004660, exon 1 of 8)
ENST00000443443	ENSG00000004766	VPS50	2.68	3' UTR
ENST00000587984	ENSG00000004777	ARHGAP33	3.86	Exon (ENST00000378944/ENSG00000004777, exon 19 of 21)
ENST00000005178	ENSG00000004799	PDK4	6.98	Exon (ENST00000669024/ENSG00000231170, exon 3 of 3)
ENST00000468445	ENSG00000004799	PDK4	4.08	3' UTR
ENST00000468445	ENSG00000004799	PDK4	4.49	Exon (ENST00000468445/ENSG00000004799, exon 2 of 2)
ENST00000490675	ENSG00000004838	ZMYND10	13	Exon (ENST00000440013/ENSG00000235058, exon 1 of 2)
ENST00000464020	ENSG00000004866	ST7	9.22	3' UTR
ENST00000570740	ENSG00000004897	CDC27	4.28	3' UTR
ENST00000005340	ENSG00000004975	DVL2	6.98	5' UTR
ENST00000572061	ENSG00000005001	PRSS22	2.77	3' UTR
ENST00000262803	ENSG00000005007	UPF1	91.7	5' UTR
ENST00000600689	ENSG00000005007	UPF1	12.9	3' UTR
ENST00000393794	ENSG00000005075	POLR2J	4.89	3' UTR
ENST00000393794	ENSG00000005075	POLR2J	11.5	3' UTR
ENST00000575153	ENSG00000005100	DHX33	2.27	3' UTR
ENST00000585941	ENSG00000005156	LIG3	8.76	5' UTR
ENST00000588109	ENSG00000005156	LIG3	9.55	3' UTR
ENST00000592244	ENSG00000005156	LIG3	5.01	3' UTR
ENST00000005386	ENSG00000005175	RPAP3	2.44	5' UTR
ENST00000548211	ENSG00000005175	RPAP3	3.37	3' UTR
ENST00000568894	ENSG00000005189	REXO5	3.66	5' UTR
ENST00000564885	ENSG00000005194	CIAPIN1	6.16	3' UTR
ENST00000586111	ENSG00000005206	SPPL2B	7.98	Exon (ENST00000586111/ENSG00000005206, exon 2 of 2)
ENST00000589515	ENSG00000005206	SPPL2B	48.5	3' UTR
ENST00000378557	ENSG00000005238	FAM214B	2.73	5' UTR
ENST00000378566	ENSG00000005238	FAM214B	22.9	5' UTR
ENST00000636895	ENSG00000005339	CREBBP	17.5	Exon (ENST00000262367/ENSG00000005339, exon 1 of 31)
ENST00000637492	ENSG00000005339	CREBBP	6.98	3' UTR
ENST00000637492	ENSG00000005339	CREBBP	27.4	3' UTR
ENST00000321027	ENSG00000005436	GCFC2	3.99	5' UTR
ENST00000257745	ENSG00000005483	KMT2E	8.97	Exon (ENST00000453677/ENSG00000239569, exon 1 of 2)
ENST00000473063	ENSG00000005483	KMT2E	12.6	3' UTR
ENST00000478079	ENSG00000005483	KMT2E	6.19	3' UTR
ENST00000479838	ENSG00000005483	KMT2E	3.4	3' UTR
ENST00000479838	ENSG00000005483	KMT2E	3.49	3' UTR
ENST00000566034	ENSG00000005513	SOX8	3.74	3' UTR
ENST00000566034	ENSG00000005513	SOX8	23.2	3' UTR
ENST00000306270	ENSG00000005700	IBTK	2.77	5' UTR
ENST00000427810	ENSG00000005801	ZNF195	2.19	5' UTR
ENST00000526540	ENSG00000005801	ZNF195	12.6	3' UTR
ENST00000526540	ENSG00000005801	ZNF195	18.5	3' UTR
ENST00000429715	ENSG00000005810	MYCBP2	5.9	3' UTR
ENST00000485061	ENSG00000005810	MYCBP2	5.57	3' UTR
ENST00000485061	ENSG00000005810	MYCBP2	6.3	Exon (ENST00000544440/ENSG00000005810, exon 56 of 83)
ENST00000544440	ENSG00000005810	MYCBP2	17	5' UTR
ENST00000612956	ENSG00000005810	MYCBP2	3.1	3' UTR
ENST00000612956	ENSG00000005810	MYCBP2	13.5	3' UTR
ENST00000477982	ENSG00000005812	FBXL3	2.58	3' UTR
ENST00000477982	ENSG00000005812	FBXL3	4.28	5' UTR
ENST00000485797	ENSG00000005812	FBXL3	32.9	Exon (ENST00000477982/ENSG00000005812, exon 3 of 3)
ENST00000506647	ENSG00000005882	PDK2	25.9	3' UTR
ENST00000320031	ENSG00000005884	ITGA3	2.41	5' UTR
ENST00000514834	ENSG00000005884	ITGA3	11.1	3' UTR
ENST00000338565	ENSG00000005889	ZFX	6.45	5' UTR
ENST00000474385	ENSG00000005889	ZFX	19.1	5' UTR
ENST00000474385	ENSG00000005889	ZFX	19.3	3' UTR
ENST00000497813	ENSG00000005889	ZFX	4.99	5' UTR
ENST00000262407	ENSG00000005961	ITGA2B	6.81	3' UTR
ENST00000563645	ENSG00000006007	GDE1	5.48	3' UTR
ENST00000595077	ENSG00000006015	REX1BD	2.69	3' UTR
ENST00000578461	ENSG00000006025	OSBPL7	7.98	3' UTR
ENST00000583120	ENSG00000006042	TMEM98	2.38	3' UTR
ENST00000376926	ENSG00000006062	MAP3K14	2.41	Exon (ENST00000344686/ENSG00000006062, exon 5 of 16)
ENST00000535480	ENSG00000006118	TMEM132A	16.1	3' UTR
ENST00000587805	ENSG00000006125	AP2B1	4.39	3' UTR
ENST00000538765	ENSG00000006194	ZNF263	7.98	5' UTR
ENST00000538765	ENSG00000006194	ZNF263	11	5' UTR
ENST00000575332	ENSG00000006194	ZNF263	22.4	3' UTR
ENST00000575823	ENSG00000006194	ZNF263	2.12	3' UTR
ENST00000359106	ENSG00000006283	CACNA1G	3.34	3' UTR
ENST00000571351	ENSG00000006327	TNFRSF12A	7.62	3' UTR
ENST00000554024	ENSG00000006432	MAP3K9	30	3' UTR
ENST00000554752	ENSG00000006432	MAP3K9	43.9	5' UTR
ENST00000611979	ENSG00000006432	MAP3K9	3.74	5' UTR
ENST00000480580	ENSG00000006453	BAIAP2L1	6.68	3' UTR
ENST00000478996	ENSG00000006459	KDM7A	11.6	3' UTR
ENST00000494053	ENSG00000006530	AGK	2.99	3' UTR
ENST00000496273	ENSG00000006530	AGK	13.3	Exon (ENST00000647898/ENSG00000006530, exon 8 of 9)
ENST00000470215	ENSG00000006576	PHTF2	2.33	3' UTR
ENST00000412332	ENSG00000006607	FARP2	2.72	3' UTR
ENST00000412332	ENSG00000006607	FARP2	6.98	3' UTR
ENST00000412332	ENSG00000006607	FARP2	12	3' UTR
ENST00000413432	ENSG00000006607	FARP2	2.41	Exon (ENST00000413432/ENSG00000006607, exon 4 of 4)
ENST00000444371	ENSG00000006607	FARP2	23.9	3' UTR
ENST00000470617	ENSG00000006607	FARP2	27.9	Exon (ENST00000470617/ENSG00000006607, exon 1 of 6)
ENST00000486736	ENSG00000006607	FARP2	6.98	Exon (ENST00000264042/ENSG00000006607, exon 21 of 27)
ENST00000426081	ENSG00000006625	GGCT	3.32	3' UTR
ENST00000498726	ENSG00000006634	DBF4	13.7	3' UTR
ENST00000458492	ENSG00000006695	COX10	22.4	3' UTR
ENST00000458492	ENSG00000006695	COX10	29.1	3' UTR
ENST00000580561	ENSG00000006695	COX10	5.32	3' UTR
ENST00000670279	ENSG00000006695	COX10	3.11	3' UTR
ENST00000670279	ENSG00000006695	COX10	8.77	Exon (ENST00000582752/ENSG00000236088, exon 1 of 5)
ENST00000486086	ENSG00000006704	GTF2IRD1	2.67	3' UTR
ENST00000595379	ENSG00000006712	PAF1	6.75	3' UTR
ENST00000490924	ENSG00000006715	VPS41	6.33	3' UTR
ENST00000584974	ENSG00000006740	ARHGAP44	5.98	3' UTR
ENST00000458014	ENSG00000006756	ARSD	13.5	Exon (ENST00000495294/ENSG00000006756, exon 3 of 3)
ENST00000481340	ENSG00000006756	ARSD	2.22	Exon (ENST00000381154/ENSG00000006756, exon 5 of 10)
ENST00000481340	ENSG00000006756	ARSD	5.6	Exon (ENST00000381154/ENSG00000006756, exon 6 of 10)
ENST00000537190	ENSG00000006831	ADIPOR2	4.75	3' UTR
ENST00000537190	ENSG00000006831	ADIPOR2	5.92	3' UTR
ENST00000265334	ENSG00000006837	CDKL3	2.49	5' UTR
ENST00000518990	ENSG00000006837	CDKL3	2.06	3' UTR
ENST00000587566	ENSG00000007047	MARK4	2.08	3' UTR
ENST00000622871	ENSG00000007047	MARK4	3.91	3' UTR
ENST00000622871	ENSG00000007047	MARK4	6.98	3' UTR
ENST00000676201	ENSG00000007168	PAFAH1B1	2.54	5' UTR
ENST00000581064	ENSG00000007202	KIAA0100	9.07	Exon (ENST00000583787/ENSG00000264044, exon 2 of 3)
ENST00000581064	ENSG00000007202	KIAA0100	11.2	Exon (ENST00000528896/ENSG00000007202, exon 16 of 39)
ENST00000392795	ENSG00000007312	CD79B	7.98	3' UTR
ENST00000581514	ENSG00000007314	SCN4A	13	Exon (ENST00000435607/ENSG00000007314, exon 10 of 24)
ENST00000358039	ENSG00000007341	ST7L	4.37	5' UTR
ENST00000418497	ENSG00000007341	ST7L	2.42	Exon (ENST00000485753/ENSG00000007341, exon 2 of 2)
ENST00000492274	ENSG00000007341	ST7L	3.99	Exon (ENST00000463235/ENSG00000007341, exon 1 of 15)
ENST00000562070	ENSG00000007376	RPUSD1	16.6	3' UTR
ENST00000448893	ENSG00000007384	RHBDF1	5.93	3' UTR
ENST00000442701	ENSG00000007392	LUC7L	3.86	3' UTR
ENST00000442701	ENSG00000007392	LUC7L	5.65	3' UTR
ENST00000483620	ENSG00000007402	CACNA2D2	2.79	Exon (ENST00000423994/ENSG00000007402, exon 33 of 39)
ENST00000483620	ENSG00000007402	CACNA2D2	3.32	Exon (ENST00000606259/ENSG00000271858, exon 1 of 3)
ENST00000566389	ENSG00000007516	BAIAP3	45.2	3' UTR
ENST00000007390	ENSG00000007520	TSR3	3.99	5' UTR
ENST00000566296	ENSG00000007520	TSR3	30.7	3' UTR
ENST00000544860	ENSG00000007541	PIGQ	14	3' UTR
ENST00000638152	ENSG00000007541	PIGQ	26.9	3' UTR
ENST00000492778	ENSG00000007545	CRAMP1	3.59	3' UTR
ENST00000492778	ENSG00000007545	CRAMP1	13.8	3' UTR
ENST00000338863	ENSG00000007866	TEAD3	8.97	3' UTR
ENST00000465508	ENSG00000007923	DNAJC11	2.24	3' UTR
ENST00000465508	ENSG00000007923	DNAJC11	2.48	3' UTR
ENST00000356840	ENSG00000007944	MYLIP	29.9	5' UTR
ENST00000361729	ENSG00000007968	E2F2	3.3	5' UTR
ENST00000487237	ENSG00000007968	E2F2	2.79	3' UTR
ENST00000487237	ENSG00000007968	E2F2	19.7	3' UTR
ENST00000474854	ENSG00000008083	JARID2	2.41	3' UTR
ENST00000474854	ENSG00000008083	JARID2	4.47	3' UTR
ENST00000474854	ENSG00000008083	JARID2	13.3	Exon (ENST00000341776/ENSG00000008083, exon 6 of 18)
ENST00000623610	ENSG00000008086	CDKL5	9.43	Exon (ENST00000379996/ENSG00000008086, exon 12 of 21)
ENST00000673617	ENSG00000008086	CDKL5	11	3' UTR
ENST00000404249	ENSG00000008128	CDK11A	2.33	3' UTR
ENST00000404249	ENSG00000008128	CDK11A	2.71	3' UTR
ENST00000404249	ENSG00000008128	CDK11A	10.5	3' UTR
ENST00000492390	ENSG00000008128	CDK11A	2.21	Exon (ENST00000404249/ENSG00000008128, exon 6 of 20)
ENST00000498806	ENSG00000008130	NADK	4.49	3' UTR
ENST00000498806	ENSG00000008130	NADK	6.98	3' UTR
ENST00000478428	ENSG00000008226	DLEC1	7.81	3' UTR
ENST00000465320	ENSG00000008256	CYTH3	2.59	3' UTR
ENST00000465320	ENSG00000008256	CYTH3	4.89	3' UTR
ENST00000465320	ENSG00000008256	CYTH3	9.29	3' UTR
ENST00000481329	ENSG00000008256	CYTH3	13	Exon (ENST00000491641/ENSG00000008256, exon 1 of 3)
ENST00000476330	ENSG00000008277	ADAM22	3.84	3' UTR
ENST00000164024	ENSG00000008300	CELSR3	14	Exon (ENST00000164024/ENSG00000008300, exon 1 of 35)
ENST00000164024	ENSG00000008300	CELSR3	17.9	5' UTR
ENST00000164024	ENSG00000008300	CELSR3	24.9	Exon (ENST00000164024/ENSG00000008300, exon 1 of 35)
ENST00000470999	ENSG00000008300	CELSR3	41.9	3' UTR
ENST00000426162	ENSG00000008311	AASS	2.42	3' UTR
ENST00000426162	ENSG00000008311	AASS	7.85	3' UTR
ENST00000474941	ENSG00000008324	SS18L2	5.1	3' UTR
ENST00000599840	ENSG00000008382	MPND	12	5' UTR
ENST00000359720	ENSG00000008394	MGST1	19.9	3' UTR
ENST00000588680	ENSG00000008441	NFIX	3.89	3' UTR
ENST00000522204	ENSG00000008513	ST3GAL1	3.66	3' UTR
ENST00000522204	ENSG00000008513	ST3GAL1	3.7	3' UTR
ENST00000522204	ENSG00000008513	ST3GAL1	9.53	5' UTR
ENST00000522204	ENSG00000008513	ST3GAL1	18.1	3' UTR
ENST00000570755	ENSG00000008516	MMP25	9.97	Exon (ENST00000576250/ENSG00000261971, exon 4 of 7)
ENST00000575441	ENSG00000008516	MMP25	2.99	Exon (ENST00000336577/ENSG00000008516, exon 6 of 10)
ENST00000486339	ENSG00000008710	PKD1	5.98	Exon (ENST00000262304/ENSG00000008710, exon 16 of 46)
ENST00000487932	ENSG00000008710	PKD1	28.3	3' UTR
ENST00000496574	ENSG00000008710	PKD1	25	Exon (ENST00000262304/ENSG00000008710, exon 15 of 46)
ENST00000565639	ENSG00000008710	PKD1	12.5	3' UTR
ENST00000579364	ENSG00000008838	MED24	3.03	3' UTR
ENST00000519210	ENSG00000008853	RHOBTB2	3.09	3' UTR
ENST00000519210	ENSG00000008853	RHOBTB2	16.8	3' UTR
ENST00000425467	ENSG00000008869	HEATR5B	3.99	3' UTR
ENST00000469890	ENSG00000008952	SEC62	2.31	3' UTR
ENST00000611269	ENSG00000009335	UBE3C	2.12	5' UTR
ENST00000368802	ENSG00000009413	REV3L	6.98	5' UTR
ENST00000413831	ENSG00000009413	REV3L	9.16	3' UTR
ENST00000413831	ENSG00000009413	REV3L	11.3	3' UTR
ENST00000373954	ENSG00000009780	FAM76A	3.59	5' UTR
ENST00000460314	ENSG00000009790	TRAF3IP3	8.97	3' UTR
ENST00000261534	ENSG00000009830	POMT2	2.18	3' UTR
ENST00000261534	ENSG00000009830	POMT2	7.16	3' UTR
ENST00000556446	ENSG00000009830	POMT2	7.2	3' UTR
ENST00000466844	ENSG00000009954	BAZ1B	5.36	3' UTR
ENST00000466844	ENSG00000009954	BAZ1B	6.87	Exon (ENST00000339594/ENSG00000009954, exon 7 of 20)
ENST00000008440	ENSG00000010072	SPRTN	3.49	5' UTR
ENST00000391858	ENSG00000010072	SPRTN	18.2	3' UTR
ENST00000391858	ENSG00000010072	SPRTN	32.9	5' UTR
ENST00000469904	ENSG00000010072	SPRTN	4.32	3' UTR
ENST00000469904	ENSG00000010072	SPRTN	5.17	3' UTR
ENST00000469904	ENSG00000010072	SPRTN	6.49	3' UTR
ENST00000361735	ENSG00000010165	EEF1AKNMT	5.98	5' UTR
ENST00000466643	ENSG00000010165	EEF1AKNMT	3.39	Exon (ENST00000478330/ENSG00000010165, exon 2 of 2)
ENST00000476386	ENSG00000010165	EEF1AKNMT	10.7	3' UTR
ENST00000579810	ENSG00000010244	ZNF207	3.7	3' UTR
ENST00000471550	ENSG00000010270	STARD3NL	2.12	5' UTR
ENST00000540891	ENSG00000010278	CD9	2.04	3' UTR
ENST00000539714	ENSG00000010292	NCAPD2	9.31	5' UTR
ENST00000619571	ENSG00000010295	IFFO1	7.63	3' UTR
ENST00000619571	ENSG00000010295	IFFO1	10.4	3' UTR
ENST00000593127	ENSG00000010310	GIPR	5.98	3' UTR
ENST00000347025	ENSG00000010318	PHF7	2.12	5' UTR
ENST00000459935	ENSG00000010318	PHF7	6.98	3' UTR
ENST00000460759	ENSG00000010322	NISCH	5.39	3' UTR
ENST00000467594	ENSG00000010322	NISCH	2.94	Exon (ENST00000479054/ENSG00000010322, exon 22 of 22)
ENST00000474188	ENSG00000010322	NISCH	10.5	Exon (ENST00000489895/ENSG00000010322, exon 7 of 18)
ENST00000488243	ENSG00000010322	NISCH	27.7	Exon (ENST00000479054/ENSG00000010322, exon 15 of 22)
ENST00000321725	ENSG00000010327	STAB1	2.11	3' UTR
ENST00000469989	ENSG00000010327	STAB1	3.99	3' UTR
ENST00000529634	ENSG00000010361	FUZ	4.42	3' UTR
ENST00000466019	ENSG00000010404	IDS	3.99	Exon (ENST00000340855/ENSG00000010404, exon 8 of 9)
ENST00000466019	ENSG00000010404	IDS	4.1	Exon (ENST00000340855/ENSG00000010404, exon 8 of 9)
ENST00000342836	ENSG00000010438	PRSS3	7.98	5' UTR
ENST00000396871	ENSG00000010539	ZNF200	7.98	5' UTR
ENST00000575285	ENSG00000010539	ZNF200	9.08	3' UTR
ENST00000007969	ENSG00000010626	LRRC23	4.54	5' UTR
ENST00000621635	ENSG00000010671	BTK	3.03	3' UTR
ENST00000461397	ENSG00000010704	HFE	2.86	5' UTR
ENST00000485729	ENSG00000010704	HFE	7.43	3' UTR
ENST00000354650	ENSG00000010810	FYN	3.16	5' UTR
ENST00000491885	ENSG00000010810	FYN	5.03	3' UTR
ENST00000367603	ENSG00000010818	HIVEP2	5.65	5' UTR
ENST00000474532	ENSG00000010818	HIVEP2	2.57	Exon (ENST00000012134/ENSG00000010818, exon 4 of 9)
ENST00000474532	ENSG00000010818	HIVEP2	3.5	Exon (ENST00000012134/ENSG00000010818, exon 4 of 9)
ENST00000474532	ENSG00000010818	HIVEP2	6.32	3' UTR
ENST00000474532	ENSG00000010818	HIVEP2	7.56	Exon (ENST00000012134/ENSG00000010818, exon 8 of 9)
ENST00000474532	ENSG00000010818	HIVEP2	11.7	5' UTR
ENST00000474532	ENSG00000010818	HIVEP2	22.3	3' UTR
ENST00000487554	ENSG00000011007	ELOA	13.4	3' UTR
ENST00000487554	ENSG00000011007	ELOA	14.3	Exon (ENST00000418390/ENSG00000011007, exon 4 of 11)
ENST00000609199	ENSG00000011007	ELOA	5.98	5' UTR
ENST00000494028	ENSG00000011021	CLCN6	6.48	Exon (ENST00000376497/ENSG00000011021, exon 6 of 6)
ENST00000492305	ENSG00000011105	TSPAN9	3.94	3' UTR
ENST00000334746	ENSG00000011114	BTBD7	9.22	5' UTR
ENST00000355125	ENSG00000011114	BTBD7	17.7	3' UTR
ENST00000316757	ENSG00000011132	APBA3	29.9	5' UTR
ENST00000591678	ENSG00000011132	APBA3	3.74	3' UTR
ENST00000537529	ENSG00000011143	MKS1	7.98	5' UTR
ENST00000537529	ENSG00000011143	MKS1	15	Exon (ENST00000654179/ENSG00000287337, exon 1 of 2)
ENST00000583577	ENSG00000011143	MKS1	3.39	3' UTR
ENST00000463153	ENSG00000011198	ABHD5	3.36	3' UTR
ENST00000463153	ENSG00000011198	ABHD5	8.97	3' UTR
ENST00000646378	ENSG00000011198	ABHD5	2.06	5' UTR
ENST00000596750	ENSG00000011243	AKAP8L	2.87	3' UTR
ENST00000596750	ENSG00000011243	AKAP8L	4.32	3' UTR
ENST00000600065	ENSG00000011243	AKAP8L	4.49	3' UTR
ENST00000600065	ENSG00000011243	AKAP8L	4.99	Exon (ENST00000624704/ENSG00000279716, exon 1 of 1)
ENST00000600247	ENSG00000011243	AKAP8L	3.99	3' UTR
ENST00000469375	ENSG00000011275	RNF216	3.05	3' UTR
ENST00000465567	ENSG00000011295	TTC19	3.99	Exon (ENST00000481107/ENSG00000011295, exon 1 of 3)
ENST00000488378	ENSG00000011332	DPF1	4.26	3' UTR
ENST00000474585	ENSG00000011376	LARS2	21.1	3' UTR
ENST00000531428	ENSG00000011405	PIK3C2A	5.4	5' UTR
ENST00000221264	ENSG00000011422	PLAUR	10.5	5' UTR
ENST00000593396	ENSG00000011422	PLAUR	3.49	3' UTR
ENST00000599892	ENSG00000011422	PLAUR	4.99	5' UTR
ENST00000595214	ENSG00000011451	WIZ	5.98	Exon (ENST00000673675/ENSG00000011451, exon 4 of 13)
ENST00000595214	ENSG00000011451	WIZ	7.98	Exon (ENST00000673675/ENSG00000011451, exon 4 of 13)
ENST00000595214	ENSG00000011451	WIZ	13	Exon (ENST00000263381/ENSG00000011451, exon 2 of 8)
ENST00000456584	ENSG00000011454	RABGAP1	3.99	Exon (ENST00000561961/ENSG00000261094, exon 2 of 2)
ENST00000456584	ENSG00000011454	RABGAP1	4.49	Exon (ENST00000561961/ENSG00000261094, exon 2 of 2)
ENST00000459903	ENSG00000011454	RABGAP1	2.49	5' UTR
ENST00000480054	ENSG00000011454	RABGAP1	2.33	3' UTR
ENST00000592769	ENSG00000011478	QPCTL	5.81	3' UTR
ENST00000592769	ENSG00000011478	QPCTL	11	3' UTR
ENST00000486994	ENSG00000011485	PPP5C	2.99	Exon (ENST00000487483/ENSG00000011485, exon 1 of 6)
ENST00000497039	ENSG00000011523	CEP68	2.31	5' UTR
ENST00000497039	ENSG00000011523	CEP68	3.66	Exon (ENST00000497039/ENSG00000011523, exon 1 of 4)
ENST00000497039	ENSG00000011523	CEP68	12	3' UTR
ENST00000497039	ENSG00000011523	CEP68	15	5' UTR
ENST00000263881	ENSG00000011566	MAP4K3	12	5' UTR
ENST00000481182	ENSG00000011590	ZBTB32	4.65	Exon (ENST00000442282/ENSG00000011590, exon 2 of 2)
ENST00000412061	ENSG00000012048	BRCA1	7.53	3' UTR
ENST00000461221	ENSG00000012048	BRCA1	5.65	5' UTR
ENST00000644379	ENSG00000012048	BRCA1	3.5	3' UTR
ENST00000592410	ENSG00000012061	ERCC1	9.06	3' UTR
ENST00000416295	ENSG00000012171	SEMA3B	7.98	Exon (ENST00000618865/ENSG00000012171, exon 18 of 18)
ENST00000376317	ENSG00000012211	PRICKLE3	6.48	3' UTR
ENST00000376317	ENSG00000012211	PRICKLE3	7.98	3' UTR
ENST00000376317	ENSG00000012211	PRICKLE3	12	3' UTR
ENST00000376317	ENSG00000012211	PRICKLE3	12	3' UTR
ENST00000614014	ENSG00000012211	PRICKLE3	8.27	3' UTR
ENST00000220562	ENSG00000012232	EXTL3	14	5' UTR
ENST00000520679	ENSG00000012232	EXTL3	2.66	3' UTR
ENST00000520679	ENSG00000012232	EXTL3	7.87	3' UTR
ENST00000521473	ENSG00000012232	EXTL3	33.1	3' UTR
ENST00000510427	ENSG00000013288	MAN2B2	9.14	3' UTR
ENST00000510427	ENSG00000013288	MAN2B2	17.7	3' UTR
ENST00000592372	ENSG00000013306	SLC25A39	2.9	3' UTR
ENST00000563915	ENSG00000013364	MVP	2.17	3' UTR
ENST00000563915	ENSG00000013364	MVP	3.15	3' UTR
ENST00000563915	ENSG00000013364	MVP	3.66	3' UTR
ENST00000468404	ENSG00000013374	NUB1	2.9	5' UTR
ENST00000480714	ENSG00000013374	NUB1	7.45	3' UTR
ENST00000504780	ENSG00000013375	PGM3	9.97	3' UTR
ENST00000369724	ENSG00000013392	RWDD2A	2.45	3' UTR
ENST00000369724	ENSG00000013392	RWDD2A	2.59	3' UTR
ENST00000369724	ENSG00000013392	RWDD2A	23	3' UTR
ENST00000321356	ENSG00000013441	CLK1	9.97	5' UTR
ENST00000472679	ENSG00000013441	CLK1	2.29	3' UTR
ENST00000228347	ENSG00000013503	POLR3B	8.16	3' UTR
ENST00000555079	ENSG00000013523	ANGEL1	5.01	5' UTR
ENST00000507291	ENSG00000013561	RNF14	4.53	3' UTR
ENST00000511961	ENSG00000013561	RNF14	12	5' UTR
ENST00000014935	ENSG00000013563	DNASE1L1	2.25	5' UTR
ENST00000539702	ENSG00000013573	DDX11	13.4	3' UTR
ENST00000540916	ENSG00000013583	HEBP1	2.56	3' UTR
ENST00000537783	ENSG00000013588	GPRC5A	5.32	5' UTR
ENST00000458173	ENSG00000013810	TACC3	25.9	Exon (ENST00000605571/ENSG00000270195, exon 1 of 1)
ENST00000470136	ENSG00000013810	TACC3	7.44	3' UTR
ENST00000612220	ENSG00000013810	TACC3	2.85	5' UTR
ENST00000651472	ENSG00000013810	TACC3	3.28	5' UTR
ENST00000461673	ENSG00000014123	UFL1	6.98	Exon (ENST00000658843/ENSG00000233797, exon 1 of 4)
ENST00000534785	ENSG00000014138	POLA2	6.02	3' UTR
ENST00000262577	ENSG00000014164	ZC3H3	2.74	Exon (ENST00000530600/ENSG00000254859, exon 2 of 2)
ENST00000262577	ENSG00000014164	ZC3H3	3.21	Exon (ENST00000530600/ENSG00000254859, exon 2 of 2)
ENST00000262577	ENSG00000014164	ZC3H3	8.62	5' UTR
ENST00000530442	ENSG00000014216	CAPN1	9.35	5' UTR
ENST00000485781	ENSG00000014641	MDH1	7.98	5' UTR
ENST00000544381	ENSG00000014641	MDH1	6.98	5' UTR
ENST00000505523	ENSG00000014824	SLC30A9	2.95	3' UTR
ENST00000439741	ENSG00000014914	MTMR11	11	3' UTR
ENST00000439741	ENSG00000014914	MTMR11	16.3	3' UTR
ENST00000553437	ENSG00000015133	CCDC88C	11.6	3' UTR
ENST00000557455	ENSG00000015133	CCDC88C	2.28	3' UTR
ENST00000557455	ENSG00000015133	CCDC88C	15.6	3' UTR
ENST00000557507	ENSG00000015133	CCDC88C	8.7	Exon (ENST00000389857/ENSG00000015133, exon 14 of 30)
ENST00000547622	ENSG00000015153	YAF2	9.97	3' UTR
ENST00000550315	ENSG00000015153	YAF2	4.84	3' UTR
ENST00000381604	ENSG00000015171	ZMYND11	6.69	5' UTR
ENST00000473115	ENSG00000015171	ZMYND11	2.34	3' UTR
ENST00000494097	ENSG00000015475	BID	11.5	3' UTR
ENST00000515833	ENSG00000015479	MATR3	3.34	Exon (ENST00000509990/ENSG00000280987, exon 4 of 17)
ENST00000515833	ENSG00000015479	MATR3	3.41	Exon (ENST00000509990/ENSG00000280987, exon 4 of 17)
ENST00000017003	ENSG00000015532	XYLT2	2.66	5' UTR
ENST00000571021	ENSG00000015532	XYLT2	3.73	3' UTR
ENST00000571021	ENSG00000015532	XYLT2	5.98	3' UTR
ENST00000571021	ENSG00000015532	XYLT2	21	3' UTR
ENST00000495582	ENSG00000015568	RGPD5	9.97	Exon (ENST00000016946/ENSG00000015568, exon 20 of 23)
ENST00000495582	ENSG00000015568	RGPD5	16	Exon (ENST00000016946/ENSG00000015568, exon 20 of 23)
ENST00000475952	ENSG00000015676	NUDCD3	15.6	3' UTR
ENST00000475952	ENSG00000015676	NUDCD3	19.9	3' UTR
ENST00000497978	ENSG00000015676	NUDCD3	7.81	Exon (ENST00000355451/ENSG00000015676, exon 1 of 6)
ENST00000505475	ENSG00000016082	ISL1	12	3' UTR
ENST00000481668	ENSG00000016391	CHDH	4.96	5' UTR
ENST00000481643	ENSG00000016864	GLT8D1	17.1	3' UTR
ENST00000507194	ENSG00000017260	ATP2C1	4.43	3' UTR
ENST00000615300	ENSG00000017483	SLC38A5	36.8	3' UTR
ENST00000619100	ENSG00000017483	SLC38A5	2.3	5' UTR
ENST00000609094	ENSG00000017797	RALBP1	7.61	5' UTR
ENST00000417478	ENSG00000018189	RUFY3	4.99	5' UTR
ENST00000512331	ENSG00000018189	RUFY3	3.55	3' UTR
ENST00000513593	ENSG00000018189	RUFY3	2.83	3' UTR
ENST00000360632	ENSG00000018408	WWTR1	3.99	5' UTR
ENST00000360632	ENSG00000018408	WWTR1	7.98	Exon (ENST00000495094/ENSG00000241313, exon 2 of 2)
ENST00000494754	ENSG00000018408	WWTR1	2.17	3' UTR
ENST00000587778	ENSG00000018869	ZNF582	8.97	3' UTR
ENST00000587778	ENSG00000018869	ZNF582	11	Exon (ENST00000301310/ENSG00000018869, exon 5 of 5)
ENST00000361417	ENSG00000019144	PHLDB1	5.98	5' UTR
ENST00000614369	ENSG00000019144	PHLDB1	10.5	Exon (ENST00000361417/ENSG00000019144, exon 7 of 24)
ENST00000620788	ENSG00000019144	PHLDB1	2.99	3' UTR
ENST00000528980	ENSG00000019485	PRDM11	2.27	3' UTR
ENST00000528980	ENSG00000019485	PRDM11	3.75	Exon (ENST00000530656/ENSG00000019485, exon 4 of 7)
ENST00000528980	ENSG00000019485	PRDM11	4.32	Exon (ENST00000534751/ENSG00000019485, exon 6 of 6)
ENST00000528980	ENSG00000019485	PRDM11	4.49	3' UTR
ENST00000020945	ENSG00000019549	SNAI2	8.97	Exon (ENST00000020945/ENSG00000019549, exon 2 of 3)
ENST00000518797	ENSG00000019582	CD74	2.83	3' UTR
ENST00000359653	ENSG00000019995	ZRANB1	21.5	5' UTR
ENST00000471421	ENSG00000019995	ZRANB1	6.95	3' UTR
ENST00000356090	ENSG00000020129	NCDN	3.24	5' UTR
ENST00000373253	ENSG00000020129	NCDN	5.98	5' UTR
ENST00000423723	ENSG00000020129	NCDN	2.66	3' UTR
ENST00000423723	ENSG00000020129	NCDN	2.99	3' UTR
ENST00000437806	ENSG00000020129	NCDN	4.53	5' UTR
ENST00000477786	ENSG00000020256	ZFP64	22.7	3' UTR
ENST00000251091	ENSG00000020577	SAMD4A	16.4	5' UTR
ENST00000554335	ENSG00000020577	SAMD4A	11	5' UTR
ENST00000554587	ENSG00000020577	SAMD4A	36.9	5' UTR
ENST00000555719	ENSG00000020577	SAMD4A	3.55	3' UTR
ENST00000468511	ENSG00000021355	SERPINB1	2.43	3' UTR
ENST00000476896	ENSG00000021355	SERPINB1	7.2	5' UTR
ENST00000156471	ENSG00000021776	AQR	3.14	3' UTR
ENST00000630677	ENSG00000022267	FHL1	9.97	3' UTR
ENST00000420933	ENSG00000022976	ZNF839	21.6	3' UTR
ENST00000561251	ENSG00000022976	ZNF839	12.7	5' UTR
ENST00000369404	ENSG00000023041	ZDHHC6	3.79	5' UTR
ENST00000529768	ENSG00000023191	RNH1	2.48	3' UTR
ENST00000531223	ENSG00000023191	RNH1	6.98	5' UTR
ENST00000531223	ENSG00000023191	RNH1	13	Exon (ENST00000533592/ENSG00000023191, exon 1 of 1)
ENST00000531540	ENSG00000023191	RNH1	3.19	5' UTR
ENST00000532055	ENSG00000023191	RNH1	2.36	5' UTR
ENST00000025008	ENSG00000023287	RB1CC1	16	5' UTR
ENST00000522957	ENSG00000023287	RB1CC1	12.6	3' UTR
ENST00000527336	ENSG00000023445	BIRC3	4.15	3' UTR
ENST00000532808	ENSG00000023445	BIRC3	11.4	5' UTR
ENST00000025301	ENSG00000023516	AKAP11	2.24	Exon (ENST00000025301/ENSG00000023516, exon 8 of 13)
ENST00000025301	ENSG00000023516	AKAP11	2.56	Exon (ENST00000025301/ENSG00000023516, exon 8 of 13)
ENST00000025301	ENSG00000023516	AKAP11	5.24	Exon (ENST00000025301/ENSG00000023516, exon 8 of 13)
ENST00000025301	ENSG00000023516	AKAP11	5.71	Exon (ENST00000025301/ENSG00000023516, exon 8 of 13)
ENST00000532573	ENSG00000023697	DERA	4.19	3' UTR
ENST00000468102	ENSG00000023892	DEF6	8.76	3' UTR
ENST00000369124	ENSG00000023902	PLEKHO1	2.99	5' UTR
ENST00000502767	ENSG00000023902	PLEKHO1	47.2	3' UTR
ENST00000370238	ENSG00000023909	GCLM	6.48	5' UTR
ENST00000488146	ENSG00000024526	DEPDC1	4.77	Exon (ENST00000456315/ENSG00000024526, exon 8 of 12)
ENST00000461122	ENSG00000025293	PHF20	34.9	5' UTR
ENST00000473943	ENSG00000025293	PHF20	21.8	3' UTR
ENST00000527949	ENSG00000025434	NR1H3	2.09	Exon (ENST00000527464/ENSG00000025434, exon 6 of 7)
ENST00000395678	ENSG00000025708	TYMP	17	3' UTR
ENST00000651095	ENSG00000025708	TYMP	8.97	5' UTR
ENST00000651095	ENSG00000025708	TYMP	9.97	5' UTR
ENST00000651490	ENSG00000025708	TYMP	7.98	5' UTR
ENST00000652401	ENSG00000025708	TYMP	6.98	Exon (ENST00000487162/ENSG00000025708, exon 2 of 2)
ENST00000369002	ENSG00000025796	SEC63	9.57	Exon (ENST00000606070/ENSG00000272476, exon 1 of 1)
ENST00000369002	ENSG00000025796	SEC63	16	5' UTR
ENST00000459782	ENSG00000025796	SEC63	2.13	3' UTR
ENST00000465210	ENSG00000025796	SEC63	2.19	Exon (ENST00000369002/ENSG00000025796, exon 17 of 21)
ENST00000373625	ENSG00000025800	KPNA6	2.8	5' UTR
ENST00000478746	ENSG00000026025	VIM	13	5' UTR
ENST00000355740	ENSG00000026103	FAS	53.8	Exon (ENST00000651408/ENSG00000286116, exon 1 of 1)
ENST00000640250	ENSG00000026103	FAS	7.47	3' UTR
ENST00000510083	ENSG00000026297	RNASET2	2.21	3' UTR
ENST00000510083	ENSG00000026297	RNASET2	6.98	Exon (ENST00000510083/ENSG00000026297, exon 1 of 2)
ENST00000525469	ENSG00000026508	CD44	2.34	3' UTR
ENST00000526553	ENSG00000026508	CD44	2.83	Exon (ENST00000415148/ENSG00000026508, exon 7 of 17)
ENST00000532339	ENSG00000026508	CD44	2.77	Exon (ENST00000534296/ENSG00000026508, exon 4 of 4)
ENST00000437165	ENSG00000026652	AGPAT4	2.22	3' UTR
ENST00000437165	ENSG00000026652	AGPAT4	3.43	3' UTR
ENST00000437165	ENSG00000026652	AGPAT4	4.63	3' UTR
ENST00000437165	ENSG00000026652	AGPAT4	4.87	3' UTR
ENST00000437165	ENSG00000026652	AGPAT4	4.99	3' UTR
ENST00000437165	ENSG00000026652	AGPAT4	5.28	3' UTR
ENST00000502361	ENSG00000026950	BTN3A1	16	3' UTR
ENST00000502361	ENSG00000026950	BTN3A1	16.5	3' UTR
ENST00000647124	ENSG00000027697	IFNGR1	12.8	3' UTR
ENST00000489921	ENSG00000028137	TNFRSF1B	7.98	3' UTR
ENST00000546409	ENSG00000028203	VEZT	3.32	5' UTR
ENST00000546951	ENSG00000028203	VEZT	6.84	3' UTR
ENST00000546951	ENSG00000028203	VEZT	8.87	3' UTR
ENST00000546951	ENSG00000028203	VEZT	15	3' UTR
ENST00000532176	ENSG00000028277	POU2F2	15.2	3' UTR
ENST00000533548	ENSG00000028277	POU2F2	11	3' UTR
ENST00000533548	ENSG00000028277	POU2F2	13	3' UTR
ENST00000533548	ENSG00000028277	POU2F2	14	3' UTR
ENST00000533548	ENSG00000028277	POU2F2	16	3' UTR
ENST00000495265	ENSG00000028310	BRD9	4.99	5' UTR
ENST00000560861	ENSG00000028528	SNX1	2.26	3' UTR
ENST00000560861	ENSG00000028528	SNX1	9.51	3' UTR
ENST00000481694	ENSG00000028839	TBPL1	5.98	3' UTR
ENST00000481694	ENSG00000028839	TBPL1	9.45	3' UTR
ENST00000544915	ENSG00000029153	ARNTL2	7.98	3' UTR
ENST00000533621	ENSG00000029363	BCLAF1	3.72	Exon (ENST00000531224/ENSG00000029363, exon 4 of 13)
ENST00000554023	ENSG00000029364	SLC39A9	2.79	Exon (ENST00000554059/ENSG00000029364, exon 3 of 3)
ENST00000554023	ENSG00000029364	SLC39A9	5.69	3' UTR
ENST00000556125	ENSG00000029364	SLC39A9	7.98	Exon (ENST00000556125/ENSG00000029364, exon 1 of 5)
ENST00000556605	ENSG00000029364	SLC39A9	9.28	5' UTR
ENST00000570487	ENSG00000029725	RABEP1	2.02	3' UTR
ENST00000572250	ENSG00000029725	RABEP1	19.4	3' UTR
ENST00000574568	ENSG00000029725	RABEP1	12.6	Exon (ENST00000537505/ENSG00000029725, exon 7 of 18)
ENST00000430118	ENSG00000029993	HMGB3	4.56	3' UTR
ENST00000530326	ENSG00000030066	NUP160	4.63	3' UTR
ENST00000532773	ENSG00000030066	NUP160	2.79	3' UTR
ENST00000532773	ENSG00000030066	NUP160	5.27	3' UTR
ENST00000374467	ENSG00000030110	BAK1	5.03	3' UTR
ENST00000484040	ENSG00000030419	IKZF2	19.9	3' UTR
ENST00000513640	ENSG00000031003	FAM13B	21.8	3' UTR
ENST00000264245	ENSG00000031081	ARHGAP31	2.18	5' UTR
ENST00000369923	ENSG00000031698	SARS1	38.4	Exon (ENST00000234677/ENSG00000031698, exon 1 of 11)
ENST00000468588	ENSG00000031698	SARS1	3.81	3' UTR
ENST00000348476	ENSG00000032219	ARID4A	3.74	5' UTR
ENST00000469635	ENSG00000032219	ARID4A	7.22	Exon (ENST00000348476/ENSG00000032219, exon 17 of 23)
ENST00000593924	ENSG00000032444	PNPLA6	2.59	5' UTR
ENST00000596515	ENSG00000032444	PNPLA6	3.92	3' UTR
ENST00000597202	ENSG00000032444	PNPLA6	2.61	3' UTR
ENST00000592661	ENSG00000033011	ALG1	7.07	3' UTR
ENST00000592661	ENSG00000033011	ALG1	7.57	3' UTR
ENST00000650085	ENSG00000033011	ALG1	39.9	5' UTR
ENST00000538116	ENSG00000033030	ZCCHC8	14.7	3' UTR
ENST00000287844	ENSG00000033050	ABCF2	112	5' UTR
ENST00000465601	ENSG00000033100	CHPF2	10.7	3' UTR
ENST00000482173	ENSG00000033100	CHPF2	4.69	5' UTR
ENST00000554765	ENSG00000033170	FUT8	14	3' UTR
ENST00000556518	ENSG00000033170	FUT8	20.9	5' UTR
ENST00000556518	ENSG00000033170	FUT8	20.9	Exon (ENST00000621019/ENSG00000276116, exon 1 of 1)
ENST00000514261	ENSG00000033178	UBA6	17.2	3' UTR
ENST00000528329	ENSG00000033327	GAB2	7.92	3' UTR
ENST00000563996	ENSG00000033800	PIAS1	11.5	3' UTR
ENST00000564009	ENSG00000033800	PIAS1	11	3' UTR
ENST00000564915	ENSG00000033800	PIAS1	8.97	5' UTR
ENST00000527123	ENSG00000034152	MAP2K3	2.46	3' UTR
ENST00000527123	ENSG00000034152	MAP2K3	10.1	3' UTR
ENST00000534743	ENSG00000034152	MAP2K3	3.28	5' UTR
ENST00000505290	ENSG00000034533	ASTE1	9.08	5' UTR
ENST00000519342	ENSG00000034677	RNF19A	11	5' UTR
ENST00000520903	ENSG00000034677	RNF19A	8.51	3' UTR
ENST00000524233	ENSG00000034677	RNF19A	16.8	5' UTR
ENST00000463865	ENSG00000035115	SH3YL1	3.66	5' UTR
ENST00000463865	ENSG00000035115	SH3YL1	6.98	Exon (ENST00000484125/ENSG00000143727, exon 1 of 2)
ENST00000471948	ENSG00000035115	SH3YL1	15	5' UTR
ENST00000479739	ENSG00000035115	SH3YL1	7.15	5' UTR
ENST00000472585	ENSG00000035403	VCL	3.6	3' UTR
ENST00000472585	ENSG00000035403	VCL	5.35	3' UTR
ENST00000509006	ENSG00000035499	DEPDC1B	4.48	3' UTR
ENST00000558064	ENSG00000035664	DAPK2	5.98	3' UTR
ENST00000502706	ENSG00000035928	RFC1	3.92	Exon (ENST00000349703/ENSG00000035928, exon 11 of 25)
ENST00000471098	ENSG00000036054	TBC1D23	5.98	5' UTR
ENST00000486274	ENSG00000036054	TBC1D23	3.29	Exon (ENST00000486274/ENSG00000036054, exon 1 of 18)
ENST00000497715	ENSG00000036257	CUL3	4.96	3' UTR
ENST00000643344	ENSG00000036473	OTC	5.72	3' UTR
ENST00000476195	ENSG00000036549	ZZZ3	2.85	3' UTR
ENST00000476195	ENSG00000036549	ZZZ3	12	Exon (ENST00000481346/ENSG00000036549, exon 2 of 11)
ENST00000481346	ENSG00000036549	ZZZ3	12.1	5' UTR
ENST00000525189	ENSG00000036672	USP2	23.9	3' UTR
ENST00000531070	ENSG00000036672	USP2	7.98	Exon (ENST00000260187/ENSG00000036672, exon 2 of 13)
ENST00000531070	ENSG00000036672	USP2	17	Exon (ENST00000530918/ENSG00000254740, exon 1 of 2)
ENST00000502932	ENSG00000037474	NSUN2	9.07	3' UTR
ENST00000456164	ENSG00000037637	FBXO42	45.6	3' UTR
ENST00000439768	ENSG00000037749	MFAP3	3.99	5' UTR
ENST00000519928	ENSG00000037749	MFAP3	2.36	Exon (ENST00000522782/ENSG00000037749, exon 2 of 3)
ENST00000519928	ENSG00000037749	MFAP3	15.7	3' UTR
ENST00000522440	ENSG00000037749	MFAP3	4.55	3' UTR
ENST00000040663	ENSG00000037757	MRI1	14.2	3' UTR
ENST00000324871	ENSG00000037897	METTL1	3.66	5' UTR
ENST00000040584	ENSG00000037965	HOXC8	2.06	3' UTR
ENST00000040584	ENSG00000037965	HOXC8	2.99	3' UTR
ENST00000040584	ENSG00000037965	HOXC8	5.66	3' UTR
ENST00000512921	ENSG00000038210	PI4K2B	2.88	5' UTR
ENST00000482713	ENSG00000038219	BOD1L1	6.68	3' UTR
ENST00000482713	ENSG00000038219	BOD1L1	14	3' UTR
ENST00000511119	ENSG00000038219	BOD1L1	10.6	Exon (ENST00000040738/ENSG00000038219, exon 8 of 26)
ENST00000511119	ENSG00000038219	BOD1L1	16	Exon (ENST00000040738/ENSG00000038219, exon 10 of 26)
ENST00000280969	ENSG00000038274	MAT2B	7.98	3' UTR
ENST00000421814	ENSG00000038274	MAT2B	2.36	5' UTR
ENST00000504606	ENSG00000038382	TRIO	15.2	Exon (ENST00000344204/ENSG00000038382, exon 4 of 57)
ENST00000508717	ENSG00000038382	TRIO	2.74	3' UTR
ENST00000508717	ENSG00000038382	TRIO	5.58	3' UTR
ENST00000508717	ENSG00000038382	TRIO	6.98	3' UTR
ENST00000508717	ENSG00000038382	TRIO	31.7	3' UTR
ENST00000409790	ENSG00000038532	CLEC16A	17.9	3' UTR
ENST00000511050	ENSG00000039319	ZFYVE16	12.3	5' UTR
ENST00000562116	ENSG00000039523	RIPOR1	9.97	Exon (ENST00000613438/ENSG00000276075, exon 1 of 2)
ENST00000565176	ENSG00000039523	RIPOR1	2.38	5' UTR
ENST00000507883	ENSG00000039560	RAI14	5.88	Exon (ENST00000265109/ENSG00000039560, exon 15 of 18)
ENST00000311371	ENSG00000039600	SOX30	18.9	3' UTR
ENST00000594661	ENSG00000039650	PNKP	3.66	5' UTR
ENST00000599543	ENSG00000039650	PNKP	4.39	3' UTR
ENST00000637897	ENSG00000039650	PNKP	3.99	Exon (ENST00000594661/ENSG00000039650, exon 1 of 14)
ENST00000564884	ENSG00000040199	PHLPP2	19.9	3' UTR
ENST00000568954	ENSG00000040199	PHLPP2	2.95	3' UTR
ENST00000522509	ENSG00000040341	STAU2	14.2	3' UTR
ENST00000522818	ENSG00000040341	STAU2	8.97	3' UTR
ENST00000522962	ENSG00000040341	STAU2	9.97	5' UTR
ENST00000523533	ENSG00000040341	STAU2	2.49	3' UTR
ENST00000432465	ENSG00000040487	SLC66A1	3.46	3' UTR
ENST00000432465	ENSG00000040487	SLC66A1	13.5	3' UTR
ENST00000576979	ENSG00000040531	CTNS	8.97	3' UTR
ENST00000425986	ENSG00000040608	RTN4R	33.9	3' UTR
ENST00000571362	ENSG00000040633	PHF23	66.8	3' UTR
ENST00000523221	ENSG00000040933	INPP4A	9.97	Exon (ENST00000463367/ENSG00000040933, exon 3 of 3)
ENST00000592334	ENSG00000041353	RAB27B	9.97	3' UTR
ENST00000558094	ENSG00000041357	PSMA4	5.19	3' UTR
ENST00000558094	ENSG00000041357	PSMA4	8.97	3' UTR
ENST00000437613	ENSG00000041802	LSG1	2.55	Exon (ENST00000265245/ENSG00000041802, exon 7 of 14)
ENST00000475763	ENSG00000041802	LSG1	9.99	3' UTR
ENST00000486510	ENSG00000041880	PARP3	5.45	3' UTR
ENST00000542877	ENSG00000041982	TNC	6.98	Exon (ENST00000350763/ENSG00000041982, exon 3 of 28)
ENST00000542877	ENSG00000041982	TNC	7.98	Exon (ENST00000350763/ENSG00000041982, exon 3 of 28)
ENST00000054650	ENSG00000041988	THAP3	22.8	3' UTR
ENST00000480647	ENSG00000041988	THAP3	2.34	3' UTR
ENST00000480647	ENSG00000041988	THAP3	3.1	3' UTR
ENST00000480647	ENSG00000041988	THAP3	8.97	Exon (ENST00000484676/ENSG00000041988, exon 2 of 2)
ENST00000480647	ENSG00000041988	THAP3	16.7	3' UTR
ENST00000393452	ENSG00000042088	TDP1	7.98	5' UTR
ENST00000555178	ENSG00000042088	TDP1	2.83	5' UTR
ENST00000555880	ENSG00000042088	TDP1	10.8	3' UTR
ENST00000373248	ENSG00000042286	AIFM2	2.6	5' UTR
ENST00000482166	ENSG00000042286	AIFM2	5.98	3' UTR
ENST00000482166	ENSG00000042286	AIFM2	7.36	3' UTR
ENST00000482166	ENSG00000042286	AIFM2	31.9	3' UTR
ENST00000554802	ENSG00000042317	SPATA7	26.1	3' UTR
ENST00000556406	ENSG00000042317	SPATA7	2.18	3' UTR
ENST00000352203	ENSG00000042753	AP2S1	7.98	5' UTR
ENST00000492563	ENSG00000043093	DCUN1D1	3.24	5' UTR
ENST00000430087	ENSG00000043143	JADE2	4.35	Exon (ENST00000282605/ENSG00000043143, exon 8 of 12)
ENST00000612830	ENSG00000043143	JADE2	12.3	3' UTR
ENST00000612830	ENSG00000043143	JADE2	22	3' UTR
ENST00000376335	ENSG00000043355	ZIC2	4.21	Exon (ENST00000376335/ENSG00000043355, exon 1 of 3)
ENST00000376335	ENSG00000043355	ZIC2	12	5' UTR
ENST00000467774	ENSG00000043514	TRIT1	6.75	3' UTR
ENST00000369295	ENSG00000043591	ADRB1	3.32	3' UTR
ENST00000369295	ENSG00000043591	ADRB1	6.98	Exon (ENST00000369295/ENSG00000043591, exon 1 of 1)
ENST00000369295	ENSG00000043591	ADRB1	12	3' UTR
ENST00000535468	ENSG00000044090	CUL7	2.9	3' UTR
ENST00000673753	ENSG00000044090	CUL7	2.83	3' UTR
ENST00000673753	ENSG00000044090	CUL7	2.83	3' UTR
ENST00000473597	ENSG00000044446	PHKA2	2.43	3' UTR
ENST00000473597	ENSG00000044446	PHKA2	5.98	3' UTR
ENST00000380647	ENSG00000044459	CNTLN	3.07	Exon (ENST00000484374/ENSG00000044459, exon 1 of 3)
ENST00000380647	ENSG00000044459	CNTLN	10.6	Exon (ENST00000484374/ENSG00000044459, exon 3 of 3)
ENST00000461247	ENSG00000044459	CNTLN	3.38	Exon (ENST00000380647/ENSG00000044459, exon 15 of 26)
ENST00000324460	ENSG00000044574	HSPA5	10.4	3' UTR
ENST00000460203	ENSG00000046647	GEMIN8	2.39	3' UTR
ENST00000464463	ENSG00000046651	OFD1	5.43	3' UTR
ENST00000474705	ENSG00000046651	OFD1	2.06	3' UTR
ENST00000474705	ENSG00000046651	OFD1	2.34	Exon (ENST00000474705/ENSG00000046651, exon 1 of 3)
ENST00000358220	ENSG00000047056	WDR37	4.11	Exon (ENST00000428780/ENSG00000232656, exon 4 of 4)
ENST00000261844	ENSG00000047346	FAM214A	52.8	5' UTR
ENST00000566948	ENSG00000047346	FAM214A	20.6	Exon (ENST00000261844/ENSG00000047346, exon 6 of 13)
ENST00000503225	ENSG00000047365	ARAP2	10.1	3' UTR
ENST00000508066	ENSG00000047365	ARAP2	7.39	5' UTR
ENST00000511416	ENSG00000047365	ARAP2	7.82	5' UTR
ENST00000568622	ENSG00000047578	KIAA0556	8.6	3' UTR
ENST00000568622	ENSG00000047578	KIAA0556	11.3	Exon (ENST00000261588/ENSG00000047578, exon 15 of 28)
ENST00000344537	ENSG00000047579	DTNBP1	7.98	3' UTR
ENST00000509318	ENSG00000047621	C12orf4	3	3' UTR
ENST00000509318	ENSG00000047621	C12orf4	9.97	3' UTR
ENST00000335271	ENSG00000047849	MAP4	7.98	Exon (ENST00000420772/ENSG00000047849, exon 1 of 8)
ENST00000383736	ENSG00000047849	MAP4	7.96	Exon (ENST00000395734/ENSG00000047849, exon 6 of 18)
ENST00000383736	ENSG00000047849	MAP4	11.9	Exon (ENST00000426837/ENSG00000047849, exon 10 of 21)
ENST00000429422	ENSG00000047849	MAP4	3.31	Exon (ENST00000426837/ENSG00000047849, exon 10 of 21)
ENST00000477765	ENSG00000047849	MAP4	2.58	3' UTR
ENST00000497735	ENSG00000047849	MAP4	29.9	5' UTR
ENST00000537642	ENSG00000048028	USP28	4.49	5' UTR
ENST00000456174	ENSG00000048052	HDAC9	2.69	5' UTR
ENST00000524023	ENSG00000048052	HDAC9	2.16	Exon (ENST00000476135/ENSG00000048052, exon 3 of 5)
ENST00000507471	ENSG00000048140	TSPAN17	19.1	3' UTR
ENST00000509257	ENSG00000048162	NOP16	5.06	3' UTR
ENST00000509257	ENSG00000048162	NOP16	10.5	3' UTR
ENST00000510220	ENSG00000048342	CC2D2A	15	3' UTR
ENST00000485577	ENSG00000048405	ZNF800	25.8	3' UTR
ENST00000563308	ENSG00000048471	SNX29	3.24	Exon (ENST00000566228/ENSG00000048471, exon 7 of 21)
ENST00000566228	ENSG00000048471	SNX29	8.97	5' UTR
ENST00000537304	ENSG00000048540	LMO3	7.98	Exon (ENST00000539036/ENSG00000008394, exon 5 of 5)
ENST00000053468	ENSG00000048544	MRPS10	2.03	Exon (ENST00000541110/ENSG00000124496, exon 5 of 18)
ENST00000053468	ENSG00000048544	MRPS10	8.35	5' UTR
ENST00000053468	ENSG00000048544	MRPS10	23.6	3' UTR
ENST00000529470	ENSG00000048649	RSF1	17	3' UTR
ENST00000531768	ENSG00000048649	RSF1	8.7	5' UTR
ENST00000534794	ENSG00000048649	RSF1	10.5	Exon (ENST00000308488/ENSG00000048649, exon 1 of 16)
ENST00000011700	ENSG00000048707	VPS13D	23.7	Exon (ENST00000620676/ENSG00000048707, exon 19 of 70)
ENST00000646917	ENSG00000048707	VPS13D	5	Exon (ENST00000620676/ENSG00000048707, exon 21 of 70)
ENST00000427765	ENSG00000048828	FAM120A	6.98	3' UTR
ENST00000410054	ENSG00000048991	R3HDM1	3.59	5' UTR
ENST00000483065	ENSG00000048991	R3HDM1	2.21	3' UTR
ENST00000378535	ENSG00000049130	KITLG	17	3' UTR
ENST00000314351	ENSG00000049192	ADAMTS6	8.97	3' UTR
ENST00000381052	ENSG00000049192	ADAMTS6	8.97	5' UTR
ENST00000470597	ENSG00000049192	ADAMTS6	13.5	5' UTR
ENST00000495451	ENSG00000049239	H6PD	2.4	3' UTR
ENST00000495451	ENSG00000049239	H6PD	2.76	3' UTR
ENST00000495451	ENSG00000049239	H6PD	3.32	3' UTR
ENST00000495451	ENSG00000049239	H6PD	4.49	3' UTR
ENST00000495451	ENSG00000049239	H6PD	6.9	3' UTR
ENST00000495451	ENSG00000049239	H6PD	7.81	3' UTR
ENST00000495451	ENSG00000049239	H6PD	10.8	Exon (ENST00000377403/ENSG00000049239, exon 5 of 5)
ENST00000602477	ENSG00000049239	H6PD	10.3	5' UTR
ENST00000470357	ENSG00000049245	VAMP3	9.09	5' UTR
ENST00000377541	ENSG00000049246	PER3	2.81	3' UTR
ENST00000494684	ENSG00000049246	PER3	8.97	3' UTR
ENST00000361696	ENSG00000049247	UTS2	5.98	3' UTR
ENST00000528630	ENSG00000049449	RCN1	2.7	3' UTR
ENST00000528630	ENSG00000049449	RCN1	2.77	3' UTR
ENST00000492210	ENSG00000049540	ELN	6.98	Exon (ENST00000445912/ENSG00000049540, exon 23 of 32)
ENST00000485545	ENSG00000049541	RFC2	3.02	3' UTR
ENST00000346085	ENSG00000049618	ARID1B	6.98	5' UTR
ENST00000350026	ENSG00000049618	ARID1B	36.9	Exon (ENST00000346085/ENSG00000049618, exon 2 of 21)
ENST00000493658	ENSG00000049618	ARID1B	7.98	3' UTR
ENST00000635928	ENSG00000049618	ARID1B	3.1	3' UTR
ENST00000635928	ENSG00000049618	ARID1B	3.32	3' UTR
ENST00000635928	ENSG00000049618	ARID1B	3.99	3' UTR
ENST00000635928	ENSG00000049618	ARID1B	30.3	3' UTR
ENST00000636254	ENSG00000049618	ARID1B	3.8	3' UTR
ENST00000636930	ENSG00000049618	ARID1B	7.98	5' UTR
ENST00000636930	ENSG00000049618	ARID1B	9.97	Exon (ENST00000603191/ENSG00000271551, exon 1 of 2)
ENST00000637933	ENSG00000049618	ARID1B	3.51	3' UTR
ENST00000515719	ENSG00000049656	CLPTM1L	5.32	3' UTR
ENST00000630539	ENSG00000049656	CLPTM1L	6.98	5' UTR
ENST00000590694	ENSG00000049759	NEDD4L	5.73	3' UTR
ENST00000676301	ENSG00000049759	NEDD4L	11.3	3' UTR
ENST00000518685	ENSG00000049768	FOXP3	5.98	3' UTR
ENST00000376188	ENSG00000049769	PPP1R3F	11	Exon (ENST00000055335/ENSG00000049769, exon 4 of 4)
ENST00000460837	ENSG00000049883	PTCD2	8.25	3' UTR
ENST00000532372	ENSG00000050165	DKK3	4.7	3' UTR
ENST00000532372	ENSG00000050165	DKK3	8.97	3' UTR
ENST00000532372	ENSG00000050165	DKK3	9.47	3' UTR
ENST00000471847	ENSG00000050327	ARHGEF5	5.57	3' UTR
ENST00000474817	ENSG00000050327	ARHGEF5	74.8	5' UTR
ENST00000498580	ENSG00000050327	ARHGEF5	13.1	Exon (ENST00000463561/ENSG00000284644, exon 1 of 6)
ENST00000498580	ENSG00000050327	ARHGEF5	15.2	Exon (ENST00000476560/ENSG00000284644, exon 1 of 3)
ENST00000498580	ENSG00000050327	ARHGEF5	16	5' UTR
ENST00000606261	ENSG00000050344	NFE2L3	24.8	3' UTR
ENST00000549064	ENSG00000050405	LIMA1	4.54	3' UTR
ENST00000552823	ENSG00000050405	LIMA1	2.51	5' UTR
ENST00000535225	ENSG00000050438	SLC4A8	4.07	5' UTR
ENST00000546875	ENSG00000050438	SLC4A8	12.1	3' UTR
ENST00000615370	ENSG00000050438	SLC4A8	6.98	5' UTR
ENST00000425491	ENSG00000050748	MAPK9	15	5' UTR
ENST00000452135	ENSG00000050748	MAPK9	3.66	3' UTR
ENST00000542031	ENSG00000050820	BCAR1	11	5' UTR
ENST00000562556	ENSG00000050820	BCAR1	46.2	3' UTR
ENST00000563038	ENSG00000050820	BCAR1	7.98	3' UTR
ENST00000563038	ENSG00000050820	BCAR1	9.98	3' UTR
ENST00000529360	ENSG00000051009	FAM160A2	5.54	3' UTR
ENST00000532797	ENSG00000051009	FAM160A2	21	Exon (ENST00000449352/ENSG00000051009, exon 9 of 12)
ENST00000568814	ENSG00000051108	HERPUD1	6.85	3' UTR
ENST00000594794	ENSG00000051128	HOMER3	4.49	5' UTR
ENST00000595756	ENSG00000051128	HOMER3	6.2	3' UTR
ENST00000526763	ENSG00000051180	RAD51	2.81	5' UTR
ENST00000474243	ENSG00000051341	POLQ	6.53	Exon (ENST00000621776/ENSG00000051341, exon 17 of 31)
ENST00000474243	ENSG00000051341	POLQ	8.8	Exon (ENST00000621776/ENSG00000051341, exon 17 of 31)
ENST00000487552	ENSG00000051382	PIK3CB	7.14	3' UTR
ENST00000674063	ENSG00000051382	PIK3CB	11	5' UTR
ENST00000561972	ENSG00000051523	CYBA	4.32	3' UTR
ENST00000367697	ENSG00000051620	HEBP2	2.44	5' UTR
ENST00000448741	ENSG00000051620	HEBP2	6.98	Exon (ENST00000401037/ENSG00000215878, exon 1 of 1)
ENST00000453452	ENSG00000051620	HEBP2	3.79	3' UTR
ENST00000453452	ENSG00000051620	HEBP2	4.46	3' UTR
ENST00000453452	ENSG00000051620	HEBP2	8.61	3' UTR
ENST00000302373	ENSG00000051825	MPHOSPH9	4.22	3' UTR
ENST00000545406	ENSG00000051825	MPHOSPH9	2.99	3' UTR
ENST00000545406	ENSG00000051825	MPHOSPH9	6.48	3' UTR
ENST00000545406	ENSG00000051825	MPHOSPH9	8.18	3' UTR
ENST00000606326	ENSG00000051825	MPHOSPH9	2.72	3' UTR
ENST00000538305	ENSG00000052126	PLEKHA5	15	3' UTR
ENST00000538677	ENSG00000052126	PLEKHA5	4.53	Exon (ENST00000429027/ENSG00000052126, exon 11 of 32)
ENST00000540972	ENSG00000052126	PLEKHA5	2.28	5' UTR
ENST00000567531	ENSG00000052344	PRSS8	6.98	3' UTR
ENST00000369524	ENSG00000052723	SIKE1	9.49	3' UTR
ENST00000465394	ENSG00000052749	RRP12	3.39	3' UTR
ENST00000465394	ENSG00000052749	RRP12	10.2	3' UTR
ENST00000487612	ENSG00000052749	RRP12	2.03	Exon (ENST00000491313/ENSG00000052749, exon 1 of 9)
ENST00000618765	ENSG00000052749	RRP12	7.98	5' UTR
ENST00000505130	ENSG00000052795	FNIP2	9.7	Exon (ENST00000264433/ENSG00000052795, exon 13 of 17)
ENST00000505130	ENSG00000052795	FNIP2	10.7	3' UTR
ENST00000505270	ENSG00000052802	MSMO1	5.28	3' UTR
ENST00000505270	ENSG00000052802	MSMO1	11.8	3' UTR
ENST00000507013	ENSG00000052802	MSMO1	6.64	3' UTR
ENST00000261302	ENSG00000053254	FOXN3	4.86	5' UTR
ENST00000261302	ENSG00000053254	FOXN3	11.9	5' UTR
ENST00000557572	ENSG00000053254	FOXN3	2.49	3' UTR
ENST00000557572	ENSG00000053254	FOXN3	8.85	3' UTR
ENST00000479559	ENSG00000053372	MRTO4	8.35	3' UTR
ENST00000479559	ENSG00000053372	MRTO4	14	3' UTR
ENST00000594399	ENSG00000053501	USE1	8.97	3' UTR
ENST00000601662	ENSG00000053501	USE1	55.8	3' UTR
ENST00000473233	ENSG00000053524	MCF2L2	7.48	5' UTR
ENST00000492331	ENSG00000053524	MCF2L2	8.97	Exon (ENST00000328913/ENSG00000053524, exon 6 of 30)
ENST00000337508	ENSG00000053702	NRIP2	6.98	3' UTR
ENST00000554213	ENSG00000053770	AP5M1	25.2	5' UTR
ENST00000554931	ENSG00000053770	AP5M1	11.8	5' UTR
ENST00000556377	ENSG00000053770	AP5M1	6.98	3' UTR
ENST00000506973	ENSG00000053900	ANAPC4	9.01	3' UTR
ENST00000462715	ENSG00000054116	TRAPPC3	2.01	Exon (ENST00000462715/ENSG00000054116, exon 1 of 3)
ENST00000462715	ENSG00000054116	TRAPPC3	10.1	3' UTR
ENST00000247665	ENSG00000054148	PHPT1	2.31	5' UTR
ENST00000371661	ENSG00000054148	PHPT1	2.33	3' UTR
ENST00000371661	ENSG00000054148	PHPT1	2.58	3' UTR
ENST00000371661	ENSG00000054148	PHPT1	4.49	3' UTR
ENST00000371661	ENSG00000054148	PHPT1	8.97	3' UTR
ENST00000371661	ENSG00000054148	PHPT1	29.9	Exon (ENST00000436881/ENSG00000232434, exon 1 of 1)
ENST00000460614	ENSG00000054179	ENTPD2	8.61	3' UTR
ENST00000444620	ENSG00000054267	ARID4B	2.25	Exon (ENST00000366603/ENSG00000054267, exon 15 of 24)
ENST00000474401	ENSG00000054267	ARID4B	2.67	3' UTR
ENST00000494543	ENSG00000054267	ARID4B	14.5	Exon (ENST00000474953/ENSG00000054267, exon 2 of 17)
ENST00000478849	ENSG00000054277	OPN3	2.85	5' UTR
ENST00000478849	ENSG00000054277	OPN3	22.5	3' UTR
ENST00000635737	ENSG00000054277	OPN3	13.2	3' UTR
ENST00000470616	ENSG00000054523	KIF1B	11.4	3' UTR
ENST00000380995	ENSG00000054611	TBC1D22A	3.66	5' UTR
ENST00000554928	ENSG00000054654	SYNE2	5.98	3' UTR
ENST00000557005	ENSG00000054654	SYNE2	3.16	3' UTR
ENST00000557060	ENSG00000054654	SYNE2	8.33	3' UTR
ENST00000557060	ENSG00000054654	SYNE2	10.5	3' UTR
ENST00000558214	ENSG00000054690	PLEKHH1	3.26	3' UTR
ENST00000558386	ENSG00000054690	PLEKHH1	8.26	Exon (ENST00000329153/ENSG00000054690, exon 6 of 29)
ENST00000537771	ENSG00000054967	RELT	2.99	3' UTR
ENST00000401089	ENSG00000055070	SZRD1	5.98	5' UTR
ENST00000472461	ENSG00000055070	SZRD1	5	3' UTR
ENST00000330883	ENSG00000055118	KCNH2	10.5	3' UTR
ENST00000330883	ENSG00000055118	KCNH2	24.9	Exon (ENST00000330883/ENSG00000055118, exon 2 of 11)
ENST00000409469	ENSG00000055130	CUL1	25	Exon (ENST00000610085/ENSG00000273314, exon 1 of 1)
ENST00000409469	ENSG00000055130	CUL1	30.3	5' UTR
ENST00000522775	ENSG00000055163	CYFIP2	2.84	3' UTR
ENST00000616178	ENSG00000055163	CYFIP2	8.97	Exon (ENST00000517634/ENSG00000253653, exon 1 of 3)
ENST00000470466	ENSG00000055208	TAB2	9.4	3' UTR
ENST00000637181	ENSG00000055208	TAB2	157	5' UTR
ENST00000462861	ENSG00000055332	EIF2AK2	2.74	3' UTR
ENST00000588130	ENSG00000055483	USP36	2.44	Exon (ENST00000589225/ENSG00000055483, exon 16 of 21)
ENST00000591052	ENSG00000055483	USP36	4.74	3' UTR
ENST00000360104	ENSG00000055609	KMT2C	9.11	Exon (ENST00000360104/ENSG00000055609, exon 1 of 22)
ENST00000418061	ENSG00000055609	KMT2C	8.09	Exon (ENST00000360104/ENSG00000055609, exon 6 of 22)
ENST00000473186	ENSG00000055609	KMT2C	12.1	Exon (ENST00000262189/ENSG00000055609, exon 14 of 59)
ENST00000485241	ENSG00000055609	KMT2C	9.22	Exon (ENST00000360104/ENSG00000055609, exon 16 of 22)
ENST00000558665	ENSG00000055609	KMT2C	5.57	Exon (ENST00000262189/ENSG00000055609, exon 36 of 59)
ENST00000474447	ENSG00000055732	MCOLN3	2.61	3' UTR
ENST00000474447	ENSG00000055732	MCOLN3	3.42	3' UTR
ENST00000338086	ENSG00000055917	PUM2	2.99	3' UTR
ENST00000361078	ENSG00000055917	PUM2	41.9	5' UTR
ENST00000485894	ENSG00000055955	ITIH4	7.98	3' UTR
ENST00000515204	ENSG00000056050	HPF1	4.32	3' UTR
ENST00000546084	ENSG00000056558	TRAF1	33.8	3' UTR
ENST00000357244	ENSG00000056586	RC3H2	5.07	3' UTR
ENST00000454740	ENSG00000056586	RC3H2	3.28	3' UTR
ENST00000495727	ENSG00000056586	RC3H2	4.23	3' UTR
ENST00000494338	ENSG00000056736	IL17RB	6.71	3' UTR
ENST00000392556	ENSG00000056972	TRAF3IP2	12.3	5' UTR
ENST00000496736	ENSG00000057019	DCBLD2	5.77	3' UTR
ENST00000496736	ENSG00000057019	DCBLD2	8.97	Exon (ENST00000496736/ENSG00000057019, exon 1 of 3)
ENST00000546741	ENSG00000057294	PKP2	3.65	Exon (ENST00000340811/ENSG00000057294, exon 3 of 13)
ENST00000546741	ENSG00000057294	PKP2	14.7	3' UTR
ENST00000546769	ENSG00000057294	PKP2	7.89	3' UTR
ENST00000549461	ENSG00000057294	PKP2	9.97	Exon (ENST00000552612/ENSG00000057294, exon 3 of 3)
ENST00000608581	ENSG00000057608	GDI2	3.09	5' UTR
ENST00000608581	ENSG00000057608	GDI2	4.11	Exon (ENST00000608273/ENSG00000272764, exon 2 of 2)
ENST00000475645	ENSG00000057663	ATG5	11.1	3' UTR
ENST00000246151	ENSG00000057757	PITHD1	5.48	3' UTR
ENST00000405094	ENSG00000057935	MTA3	16	5' UTR
ENST00000475636	ENSG00000058063	ATP11B	5.98	3' UTR
ENST00000449528	ENSG00000058091	CDK14	6.84	3' UTR
ENST00000498837	ENSG00000058262	SEC61A1	16.6	3' UTR
ENST00000261207	ENSG00000058272	PPP1R12A	25.9	Exon (ENST00000552885/ENSG00000257557, exon 1 of 3)
ENST00000552892	ENSG00000058272	PPP1R12A	6.31	3' UTR
ENST00000634739	ENSG00000058272	PPP1R12A	2.22	3' UTR
ENST00000466256	ENSG00000058453	CROCC	15	Exon (ENST00000633433/ENSG00000282740, exon 3 of 3)
ENST00000563282	ENSG00000058600	POLR3E	2.88	3' UTR
ENST00000563282	ENSG00000058600	POLR3E	8.61	3' UTR
ENST00000565117	ENSG00000058600	POLR3E	8.16	3' UTR
ENST00000341360	ENSG00000058668	ATP2B4	9.78	5' UTR
ENST00000367218	ENSG00000058668	ATP2B4	2.59	5' UTR
ENST00000488411	ENSG00000058673	ZC3H11A	2.09	3' UTR
ENST00000488411	ENSG00000058673	ZC3H11A	2.1	3' UTR
ENST00000488411	ENSG00000058673	ZC3H11A	5.37	3' UTR
ENST00000488411	ENSG00000058673	ZC3H11A	5.37	3' UTR
ENST00000488411	ENSG00000058673	ZC3H11A	5.39	3' UTR
ENST00000488411	ENSG00000058673	ZC3H11A	5.51	3' UTR
ENST00000495527	ENSG00000058673	ZC3H11A	3.01	5' UTR
ENST00000495527	ENSG00000058673	ZC3H11A	3.1	5' UTR
ENST00000495527	ENSG00000058673	ZC3H11A	11.8	3' UTR
ENST00000495527	ENSG00000058673	ZC3H11A	11.9	5' UTR
ENST00000495527	ENSG00000058673	ZC3H11A	12	3' UTR
ENST00000495527	ENSG00000058673	ZC3H11A	12.2	5' UTR
ENST00000495527	ENSG00000058673	ZC3H11A	15.9	5' UTR
ENST00000495527	ENSG00000058673	ZC3H11A	16.3	5' UTR
ENST00000511293	ENSG00000058729	RIOK2	5.19	Exon (ENST00000283109/ENSG00000058729, exon 7 of 10)
ENST00000480952	ENSG00000058804	NDC1	10.7	3' UTR
ENST00000447054	ENSG00000058866	DGKG	7.98	Exon (ENST00000480809/ENSG00000058866, exon 24 of 24)
ENST00000447054	ENSG00000058866	DGKG	9.93	3' UTR
ENST00000447054	ENSG00000058866	DGKG	12	Exon (ENST00000480809/ENSG00000058866, exon 24 of 24)
ENST00000447054	ENSG00000058866	DGKG	17.1	3' UTR
ENST00000575679	ENSG00000059122	FLYWCH1	6.48	3' UTR
ENST00000575679	ENSG00000059122	FLYWCH1	18.9	3' UTR
ENST00000562537	ENSG00000059145	UNKL	2.13	3' UTR
ENST00000562537	ENSG00000059145	UNKL	4.83	3' UTR
ENST00000562537	ENSG00000059145	UNKL	6.23	3' UTR
ENST00000484111	ENSG00000059378	PARP12	4.86	3' UTR
ENST00000371224	ENSG00000059573	ALDH18A1	26.9	3' UTR
ENST00000040877	ENSG00000059588	TARBP1	11	5' UTR
ENST00000471918	ENSG00000059588	TARBP1	2.99	3' UTR
ENST00000510396	ENSG00000059691	GATB	11	3' UTR
ENST00000515564	ENSG00000059691	GATB	3.66	Exon (ENST00000515564/ENSG00000059691, exon 1 of 11)
ENST00000465446	ENSG00000059728	MXD1	5.37	3' UTR
ENST00000465446	ENSG00000059728	MXD1	10.1	3' UTR
ENST00000548422	ENSG00000059758	CDK17	10.5	3' UTR
ENST00000313525	ENSG00000059769	DNAJC25	6.08	3' UTR
ENST00000075120	ENSG00000059804	SLC2A3	14	5' UTR
ENST00000543435	ENSG00000059804	SLC2A3	4.83	3' UTR
ENST00000492902	ENSG00000059915	PSD	2.29	Exon (ENST00000492902/ENSG00000059915, exon 1 of 4)
ENST00000492902	ENSG00000059915	PSD	23.2	3' UTR
ENST00000585951	ENSG00000060069	CTDP1	4.93	3' UTR
ENST00000590599	ENSG00000060069	CTDP1	13.8	Exon (ENST00000613122/ENSG00000060069, exon 7 of 13)
ENST00000279550	ENSG00000060138	YBX3	6.61	5' UTR
ENST00000542424	ENSG00000060237	WNK1	6.1	Exon (ENST00000315939/ENSG00000060237, exon 23 of 28)
ENST00000542543	ENSG00000060237	WNK1	12	Exon (ENST00000675236/ENSG00000060237, exon 1 of 10)
ENST00000674810	ENSG00000060237	WNK1	6.98	Exon (ENST00000530271/ENSG00000060237, exon 9 of 31)
ENST00000480627	ENSG00000060339	CCAR1	3.22	3' UTR
ENST00000290291	ENSG00000060491	OGFR	2.23	5' UTR
ENST00000290291	ENSG00000060491	OGFR	7.98	Exon (ENST00000431361/ENSG00000229873, exon 1 of 3)
ENST00000290291	ENSG00000060491	OGFR	25.9	3' UTR
ENST00000674317	ENSG00000060642	PIGV	5.86	3' UTR
ENST00000674335	ENSG00000060642	PIGV	13	5' UTR
ENST00000492954	ENSG00000060656	PTPRU	4.32	3' UTR
ENST00000524678	ENSG00000060749	QSER1	7.87	Exon (ENST00000650167/ENSG00000060749, exon 4 of 13)
ENST00000524678	ENSG00000060749	QSER1	10.6	Exon (ENST00000650167/ENSG00000060749, exon 4 of 13)
ENST00000528034	ENSG00000060749	QSER1	3.38	3' UTR
ENST00000528155	ENSG00000060749	QSER1	3.66	Exon (ENST00000650167/ENSG00000060749, exon 3 of 13)
ENST00000451419	ENSG00000060971	ACAA1	7.75	3' UTR
ENST00000427332	ENSG00000061273	HDAC7	5.48	5' UTR
ENST00000434070	ENSG00000061273	HDAC7	10.4	3' UTR
ENST00000434070	ENSG00000061273	HDAC7	11.3	3' UTR
ENST00000549883	ENSG00000061273	HDAC7	7.02	3' UTR
ENST00000549883	ENSG00000061273	HDAC7	7.09	3' UTR
ENST00000462896	ENSG00000061656	SPAG4	13	5' UTR
ENST00000361354	ENSG00000061676	NCKAP1	149	5' UTR
ENST00000477988	ENSG00000061676	NCKAP1	2.3	3' UTR
ENST00000540469	ENSG00000061936	SFSWAP	7.98	5' UTR
ENST00000672887	ENSG00000061938	TNK2	9.12	5' UTR
ENST00000672887	ENSG00000061938	TNK2	17	Exon (ENST00000458180/ENSG00000224614, exon 1 of 2)
ENST00000673038	ENSG00000061938	TNK2	20.9	5' UTR
ENST00000673167	ENSG00000061938	TNK2	4.99	Exon (ENST00000607976/ENSG00000260261, exon 3 of 3)
ENST00000673236	ENSG00000061938	TNK2	5.83	3' UTR
ENST00000673236	ENSG00000061938	TNK2	21.9	3' UTR
ENST00000551307	ENSG00000061987	MON2	2.04	3' UTR
ENST00000551307	ENSG00000061987	MON2	4.92	3' UTR
ENST00000551397	ENSG00000061987	MON2	8.25	3' UTR
ENST00000641654	ENSG00000061987	MON2	3.49	5' UTR
ENST00000569117	ENSG00000062038	CDH3	7.98	3' UTR
ENST00000569117	ENSG00000062038	CDH3	13	3' UTR
ENST00000514387	ENSG00000062194	GPBP1	20.6	5' UTR
ENST00000515484	ENSG00000062194	GPBP1	8.17	3' UTR
ENST00000263800	ENSG00000062524	LTK	8.9	5' UTR
ENST00000569283	ENSG00000062524	LTK	4.11	3' UTR
ENST00000483330	ENSG00000062582	MRPS24	4.05	3' UTR
ENST00000483330	ENSG00000062582	MRPS24	4.05	3' UTR
ENST00000467800	ENSG00000062598	ELMO2	4.99	Exon (ENST00000612368/ENSG00000273828, exon 1 of 5)
ENST00000587259	ENSG00000062716	VMP1	8.97	5' UTR
ENST00000588915	ENSG00000062716	VMP1	3.66	5' UTR
ENST00000593168	ENSG00000062716	VMP1	3.1	5' UTR
ENST00000083182	ENSG00000062725	APPBP2	46.9	5' UTR
ENST00000592995	ENSG00000062725	APPBP2	2.89	3' UTR
ENST00000549592	ENSG00000063046	EIF4B	6.46	Exon (ENST00000549592/ENSG00000063046, exon 1 of 3)
ENST00000335875	ENSG00000063127	SLC6A16	19.1	5' UTR
ENST00000602258	ENSG00000063169	BICRA	7.35	3' UTR
ENST00000602258	ENSG00000063169	BICRA	8.97	3' UTR
ENST00000614245	ENSG00000063169	BICRA	4.99	Exon (ENST00000396720/ENSG00000063169, exon 6 of 15)
ENST00000614245	ENSG00000063169	BICRA	6.98	5' UTR
ENST00000614245	ENSG00000063169	BICRA	18.4	5' UTR
ENST00000340932	ENSG00000063176	SPHK2	5.98	5' UTR
ENST00000598574	ENSG00000063176	SPHK2	2.88	3' UTR
ENST00000598574	ENSG00000063176	SPHK2	2.99	3' UTR
ENST00000598574	ENSG00000063176	SPHK2	2.99	3' UTR
ENST00000598574	ENSG00000063176	SPHK2	3.49	3' UTR
ENST00000598574	ENSG00000063176	SPHK2	3.51	3' UTR
ENST00000552347	ENSG00000063177	RPL18	6.98	5' UTR
ENST00000084798	ENSG00000063180	CA11	143	5' UTR
ENST00000590921	ENSG00000063241	ISOC2	40	3' UTR
ENST00000450554	ENSG00000063244	U2AF2	10.5	5' UTR
ENST00000587937	ENSG00000063245	EPN1	3.39	3' UTR
ENST00000596297	ENSG00000063322	MED29	2.96	3' UTR
ENST00000507048	ENSG00000063438	AHRR	4.65	3' UTR
ENST00000507048	ENSG00000063438	AHRR	4.65	3' UTR
ENST00000507048	ENSG00000063438	AHRR	7.98	3' UTR
ENST00000507048	ENSG00000063438	AHRR	7.98	3' UTR
ENST00000507048	ENSG00000063438	AHRR	11	3' UTR
ENST00000507048	ENSG00000063438	AHRR	11	3' UTR
ENST00000507048	ENSG00000063438	AHRR	13	3' UTR
ENST00000507048	ENSG00000063438	AHRR	16	3' UTR
ENST00000507048	ENSG00000063438	AHRR	16	3' UTR
ENST00000507048	ENSG00000063438	AHRR	38.4	3' UTR
ENST00000507048	ENSG00000063438	AHRR	38.9	3' UTR
ENST00000507048	ENSG00000063438	AHRR	40.9	3' UTR
ENST00000370249	ENSG00000063587	ZNF275	4.99	5' UTR
ENST00000438239	ENSG00000063587	ZNF275	5.01	3' UTR
ENST00000438239	ENSG00000063587	ZNF275	5.38	3' UTR
ENST00000438239	ENSG00000063587	ZNF275	10.3	3' UTR
ENST00000647705	ENSG00000063587	ZNF275	14.4	3' UTR
ENST00000370387	ENSG00000063601	MTMR1	3.47	3' UTR
ENST00000466624	ENSG00000063660	GPC1	2.14	3' UTR
ENST00000466624	ENSG00000063660	GPC1	4.24	3' UTR
ENST00000466624	ENSG00000063660	GPC1	15.1	3' UTR
ENST00000567398	ENSG00000063854	HAGH	14	3' UTR
ENST00000567398	ENSG00000063854	HAGH	17.9	Exon (ENST00000567398/ENSG00000063854, exon 2 of 3)
ENST00000508235	ENSG00000063978	RNF4	5.53	3' UTR
ENST00000358485	ENSG00000064012	CASP8	4.7	5' UTR
ENST00000392258	ENSG00000064012	CASP8	11.5	5' UTR
ENST00000392263	ENSG00000064012	CASP8	2.99	3' UTR
ENST00000392263	ENSG00000064012	CASP8	7.65	3' UTR
ENST00000392263	ENSG00000064012	CASP8	7.98	3' UTR
ENST00000429881	ENSG00000064012	CASP8	6.73	3' UTR
ENST00000444430	ENSG00000064012	CASP8	6.57	3' UTR
ENST00000444430	ENSG00000064012	CASP8	7.98	3' UTR
ENST00000505705	ENSG00000064042	LIMCH1	8.97	3' UTR
ENST00000538016	ENSG00000064102	INTS13	17.1	3' UTR
ENST00000524614	ENSG00000064199	SPA17	2.15	Exon (ENST00000532692/ENSG00000064199, exon 1 of 4)
ENST00000532692	ENSG00000064199	SPA17	2.57	5' UTR
ENST00000566874	ENSG00000064270	ATP2C2	6.98	Exon (ENST00000416219/ENSG00000064270, exon 27 of 28)
ENST00000567222	ENSG00000064270	ATP2C2	32.9	Exon (ENST00000565700/ENSG00000261286, exon 3 of 3)
ENST00000567222	ENSG00000064270	ATP2C2	40.9	Exon (ENST00000416219/ENSG00000064270, exon 21 of 28)
ENST00000567629	ENSG00000064270	ATP2C2	3.74	Exon (ENST00000567222/ENSG00000064270, exon 1 of 4)
ENST00000567892	ENSG00000064270	ATP2C2	15	Exon (ENST00000416219/ENSG00000064270, exon 17 of 28)
ENST00000531830	ENSG00000064309	CDON	3.32	Exon (ENST00000392693/ENSG00000064309, exon 7 of 20)
ENST00000378164	ENSG00000064313	TAF2	4.26	5' UTR
ENST00000526969	ENSG00000064313	TAF2	3.18	3' UTR
ENST00000342645	ENSG00000064393	HIPK2	9.19	Exon (ENST00000406875/ENSG00000064393, exon 2 of 15)
ENST00000602276	ENSG00000064489	BORCS8-MEF2B	4.09	3' UTR
ENST00000591443	ENSG00000064545	TMEM161A	3.43	3' UTR
ENST00000542587	ENSG00000064547	LPAR2	6.12	3' UTR
ENST00000542587	ENSG00000064547	LPAR2	17	5' UTR
ENST00000592061	ENSG00000064547	LPAR2	37.2	3' UTR
ENST00000606394	ENSG00000064601	CTSA	8.97	5' UTR
ENST00000606788	ENSG00000064601	CTSA	8.97	3' UTR
ENST00000597095	ENSG00000064607	SUGP2	2.35	3' UTR
ENST00000597163	ENSG00000064607	SUGP2	2.25	3' UTR
ENST00000598240	ENSG00000064607	SUGP2	4.75	3' UTR
ENST00000262461	ENSG00000064651	SLC12A2	26.9	5' UTR
ENST00000513881	ENSG00000064652	SNX24	7.23	5' UTR
ENST00000515729	ENSG00000064652	SNX24	2.3	3' UTR
ENST00000515729	ENSG00000064652	SNX24	7.55	3' UTR
ENST00000513719	ENSG00000064692	SNCAIP	27.9	3' UTR
ENST00000515215	ENSG00000064692	SNCAIP	17	Exon (ENST00000514467/ENSG00000064692, exon 3 of 4)
ENST00000533164	ENSG00000064703	DDX20	2.79	5' UTR
ENST00000533164	ENSG00000064703	DDX20	8.97	Exon (ENST00000412270/ENSG00000284830, exon 1 of 3)
ENST00000534200	ENSG00000064703	DDX20	32.3	3' UTR
ENST00000182377	ENSG00000064763	FAR2	4.99	5' UTR
ENST00000547759	ENSG00000064763	FAR2	3.82	3' UTR
ENST00000550541	ENSG00000064763	FAR2	4.99	Exon (ENST00000549080/ENSG00000064763, exon 2 of 2)
ENST00000550541	ENSG00000064763	FAR2	9.97	Exon (ENST00000550541/ENSG00000064763, exon 2 of 2)
ENST00000586109	ENSG00000064932	SBNO2	2.83	3' UTR
ENST00000590176	ENSG00000064932	SBNO2	46.9	5' UTR
ENST00000409593	ENSG00000064933	PMS1	6.98	3' UTR
ENST00000452382	ENSG00000064933	PMS1	19.4	3' UTR
ENST00000483293	ENSG00000064933	PMS1	5.16	3' UTR
ENST00000639501	ENSG00000064933	PMS1	13	5' UTR
ENST00000650109	ENSG00000064995	TAF11	9.27	3' UTR
ENST00000360359	ENSG00000064999	ANKS1A	62.8	5' UTR
ENST00000470698	ENSG00000064999	ANKS1A	2.14	3' UTR
ENST00000470698	ENSG00000064999	ANKS1A	3.34	3' UTR
ENST00000470698	ENSG00000064999	ANKS1A	8.97	Exon (ENST00000470698/ENSG00000064999, exon 1 of 6)
ENST00000498555	ENSG00000065029	ZNF76	5.54	3' UTR
ENST00000564033	ENSG00000065054	SLC9A3R2	4.65	3' UTR
ENST00000564033	ENSG00000065054	SLC9A3R2	5.08	3' UTR
ENST00000651522	ENSG00000065057	NTHL1	6.68	Exon (ENST00000219066/ENSG00000065057, exon 2 of 6)
ENST00000480641	ENSG00000065150	IPO5	7.48	5' UTR
ENST00000493122	ENSG00000065150	IPO5	2.74	3' UTR
ENST00000493122	ENSG00000065150	IPO5	2.96	3' UTR
ENST00000471680	ENSG00000065183	WDR3	6.41	3' UTR
ENST00000316005	ENSG00000065243	PKN2	2.15	5' UTR
ENST00000495119	ENSG00000065243	PKN2	9.46	3' UTR
ENST00000182527	ENSG00000065308	TRAM2	8.38	3' UTR
ENST00000182527	ENSG00000065308	TRAM2	13.4	3' UTR
ENST00000173229	ENSG00000065320	NTN1	7.68	Exon (ENST00000173229/ENSG00000065320, exon 2 of 7)
ENST00000173229	ENSG00000065320	NTN1	9.97	5' UTR
ENST00000436734	ENSG00000065320	NTN1	3.19	3' UTR
ENST00000485659	ENSG00000065328	MCM10	10.1	3' UTR
ENST00000546878	ENSG00000065357	DGKA	4.17	5' UTR
ENST00000546878	ENSG00000065357	DGKA	6.48	5' UTR
ENST00000548491	ENSG00000065357	DGKA	3.43	3' UTR
ENST00000552478	ENSG00000065357	DGKA	6.58	Exon (ENST00000551296/ENSG00000065357, exon 1 of 22)
ENST00000486006	ENSG00000065413	ANKRD44	2.52	3' UTR
ENST00000307921	ENSG00000065457	ADAT1	15	5' UTR
ENST00000564657	ENSG00000065457	ADAT1	2.16	5' UTR
ENST00000566450	ENSG00000065457	ADAT1	4.81	3' UTR
ENST00000568478	ENSG00000065457	ADAT1	16	3' UTR
ENST00000316218	ENSG00000065485	PDIA5	23.9	5' UTR
ENST00000373491	ENSG00000065491	TBC1D22B	2.82	5' UTR
ENST00000373491	ENSG00000065491	TBC1D22B	2.99	5' UTR
ENST00000496588	ENSG00000065518	NDUFB4	2.99	3' UTR
ENST00000471538	ENSG00000065526	SPEN	30.4	5' UTR
ENST00000487496	ENSG00000065526	SPEN	2	Exon (ENST00000375759/ENSG00000065526, exon 11 of 15)
ENST00000487496	ENSG00000065526	SPEN	2.18	Exon (ENST00000375759/ENSG00000065526, exon 11 of 15)
ENST00000487496	ENSG00000065526	SPEN	3.98	Exon (ENST00000375759/ENSG00000065526, exon 11 of 15)
ENST00000487496	ENSG00000065526	SPEN	9.67	Exon (ENST00000673875/ENSG00000065526, exon 11 of 12)
ENST00000487496	ENSG00000065526	SPEN	21.7	3' UTR
ENST00000445547	ENSG00000065548	ZC3H15	4.34	3' UTR
ENST00000536413	ENSG00000065559	MAP2K4	2.3	3' UTR
ENST00000536413	ENSG00000065559	MAP2K4	20.6	3' UTR
ENST00000478166	ENSG00000065600	PACC1	10.3	3' UTR
ENST00000369755	ENSG00000065613	SLK	5.98	5' UTR
ENST00000474260	ENSG00000065613	SLK	4.37	Exon (ENST00000369755/ENSG00000065613, exon 8 of 19)
ENST00000369679	ENSG00000065615	CYB5R4	5.98	5' UTR
ENST00000498052	ENSG00000065621	GSTO2	6.86	3' UTR
ENST00000498052	ENSG00000065621	GSTO2	7.41	3' UTR
ENST00000466451	ENSG00000065665	SEC61A2	2.38	3' UTR
ENST00000610727	ENSG00000065675	PRKCQ	9.47	3' UTR
ENST00000473306	ENSG00000065802	ASB1	7.55	3' UTR
ENST00000481566	ENSG00000065802	ASB1	2.89	3' UTR
ENST00000481566	ENSG00000065802	ASB1	9.15	3' UTR
ENST00000475858	ENSG00000065809	FAM107B	14	3' UTR
ENST00000491553	ENSG00000065882	TBC1D1	2.31	Exon (ENST00000261439/ENSG00000065882, exon 3 of 20)
ENST00000492180	ENSG00000065882	TBC1D1	3.25	3' UTR
ENST00000615497	ENSG00000065882	TBC1D1	16.3	3' UTR
ENST00000181839	ENSG00000065883	CDK13	32.9	3' UTR
ENST00000465643	ENSG00000065883	CDK13	9.97	3' UTR
ENST00000465643	ENSG00000065883	CDK13	21.5	3' UTR
ENST00000642626	ENSG00000065883	CDK13	14.7	5' UTR
ENST00000491894	ENSG00000065923	SLC9A7	8.08	3' UTR
ENST00000491894	ENSG00000065923	SLC9A7	8.37	3' UTR
ENST00000428177	ENSG00000065970	FOXJ2	4.39	5' UTR
ENST00000321358	ENSG00000065978	YBX1	5.18	5' UTR
ENST00000321358	ENSG00000065978	YBX1	6.98	Exon (ENST00000414339/ENSG00000234917, exon 2 of 2)
ENST00000590407	ENSG00000065989	PDE4A	2.44	3' UTR
ENST00000590407	ENSG00000065989	PDE4A	11.2	3' UTR
ENST00000261461	ENSG00000066027	PPP2R5A	2.19	5' UTR
ENST00000537030	ENSG00000066027	PPP2R5A	8.97	5' UTR
ENST00000549620	ENSG00000066084	DIP2B	2.66	3' UTR
ENST00000549620	ENSG00000066084	DIP2B	7.58	3' UTR
ENST00000381513	ENSG00000066117	SMARCD1	2.79	3' UTR
ENST00000381513	ENSG00000066117	SMARCD1	7.98	5' UTR
ENST00000549526	ENSG00000066117	SMARCD1	4.7	3' UTR
ENST00000294732	ENSG00000066279	ASPM	16.3	3' UTR
ENST00000367408	ENSG00000066279	ASPM	2.52	Exon (ENST00000367409/ENSG00000066279, exon 18 of 28)
ENST00000367408	ENSG00000066279	ASPM	2.89	Exon (ENST00000367409/ENSG00000066279, exon 18 of 28)
ENST00000367408	ENSG00000066279	ASPM	10.9	Exon (ENST00000367409/ENSG00000066279, exon 18 of 28)
ENST00000367408	ENSG00000066279	ASPM	11.4	Exon (ENST00000367409/ENSG00000066279, exon 18 of 28)
ENST00000367409	ENSG00000066279	ASPM	4.24	5' UTR
ENST00000378538	ENSG00000066336	SPI1	14	Exon (ENST00000666926/ENSG00000255197, exon 3 of 3)
ENST00000479660	ENSG00000066405	CLDN18	8.97	3' UTR
ENST00000479660	ENSG00000066405	CLDN18	13.3	Exon (ENST00000343735/ENSG00000066405, exon 2 of 5)
ENST00000312938	ENSG00000066422	ZBTB11	5.31	5' UTR
ENST00000312938	ENSG00000066422	ZBTB11	20.9	Exon (ENST00000609682/ENSG00000256628, exon 1 of 1)
ENST00000461821	ENSG00000066422	ZBTB11	2.31	3' UTR
ENST00000471673	ENSG00000066422	ZBTB11	15.3	3' UTR
ENST00000642417	ENSG00000066427	ATXN3	5.29	3' UTR
ENST00000163416	ENSG00000066455	GOLGA5	32.6	5' UTR
ENST00000554700	ENSG00000066455	GOLGA5	5.98	3' UTR
ENST00000467584	ENSG00000066468	FGFR2	7.1	3' UTR
ENST00000466316	ENSG00000066651	TRMT11	2.92	3' UTR
ENST00000570231	ENSG00000066654	THUMPD1	3.59	3' UTR
ENST00000570231	ENSG00000066654	THUMPD1	20.3	3' UTR
ENST00000622639	ENSG00000066697	MSANTD3	4.75	5' UTR
ENST00000315264	ENSG00000066735	KIF26A	3.16	Exon (ENST00000423312/ENSG00000066735, exon 12 of 15)
ENST00000315264	ENSG00000066735	KIF26A	24.7	Exon (ENST00000423312/ENSG00000066735, exon 12 of 15)
ENST00000315264	ENSG00000066735	KIF26A	24.9	3' UTR
ENST00000315264	ENSG00000066735	KIF26A	40.5	3' UTR
ENST00000555263	ENSG00000066739	ATG2B	20	3' UTR
ENST00000518290	ENSG00000066777	ARFGEF1	5.98	3' UTR
ENST00000521673	ENSG00000066827	ZFAT	2.24	3' UTR
ENST00000518352	ENSG00000066855	MTFR1	5.41	Exon (ENST00000262146/ENSG00000066855, exon 6 of 8)
ENST00000523170	ENSG00000066855	MTFR1	2.45	5' UTR
ENST00000412190	ENSG00000066923	STAG3	4.99	Exon (ENST00000328453/ENSG00000239521, exon 7 of 8)
ENST00000479359	ENSG00000066923	STAG3	2.83	Exon (ENST00000426455/ENSG00000066923, exon 19 of 34)
ENST00000492674	ENSG00000066923	STAG3	3.74	Exon (ENST00000426455/ENSG00000066923, exon 30 of 34)
ENST00000356056	ENSG00000066933	MYO9A	17.2	3' UTR
ENST00000561618	ENSG00000066933	MYO9A	6.48	Exon (ENST00000356056/ENSG00000066933, exon 24 of 42)
ENST00000564571	ENSG00000066933	MYO9A	9.97	5' UTR
ENST00000564931	ENSG00000066933	MYO9A	4.86	5' UTR
ENST00000568481	ENSG00000066933	MYO9A	13	3' UTR
ENST00000568481	ENSG00000066933	MYO9A	25.9	3' UTR
ENST00000568781	ENSG00000066933	MYO9A	6.46	Exon (ENST00000356056/ENSG00000066933, exon 25 of 42)
ENST00000407806	ENSG00000067057	PFKP	7.48	5' UTR
ENST00000381344	ENSG00000067064	IDI1	6.65	5' UTR
ENST00000427898	ENSG00000067064	IDI1	3.32	5' UTR
ENST00000427898	ENSG00000067064	IDI1	4.25	Exon (ENST00000482091/ENSG00000067064, exon 2 of 3)
ENST00000459786	ENSG00000067066	SP100	2.07	Exon (ENST00000264052/ENSG00000067066, exon 18 of 25)
ENST00000488180	ENSG00000067066	SP100	2.08	3' UTR
ENST00000488180	ENSG00000067066	SP100	5.72	3' UTR
ENST00000488180	ENSG00000067066	SP100	6.44	3' UTR
ENST00000173785	ENSG00000067082	KLF6	7.58	3' UTR
ENST00000461124	ENSG00000067082	KLF6	2.71	3' UTR
ENST00000558485	ENSG00000067141	NEO1	2.66	Exon (ENST00000339362/ENSG00000067141, exon 3 of 30)
ENST00000558886	ENSG00000067141	NEO1	10.1	3' UTR
ENST00000373542	ENSG00000067177	PHKA1	10.5	5' UTR
ENST00000535038	ENSG00000067182	TNFRSF1A	2.02	3' UTR
ENST00000535038	ENSG00000067182	TNFRSF1A	17.6	3' UTR
ENST00000582544	ENSG00000067191	CACNB1	3.49	3' UTR
ENST00000582544	ENSG00000067191	CACNB1	32.2	3' UTR
ENST00000561480	ENSG00000067221	STOML1	3.99	3' UTR
ENST00000319622	ENSG00000067225	PKM	12	5' UTR
ENST00000513447	ENSG00000067248	DHX29	4.52	Exon (ENST00000251636/ENSG00000067248, exon 11 of 27)
ENST00000513447	ENSG00000067248	DHX29	6.98	Exon (ENST00000506435/ENSG00000251307, exon 1 of 5)
ENST00000462746	ENSG00000067334	DNTTIP2	6.98	3' UTR
ENST00000496672	ENSG00000067334	DNTTIP2	8.25	Exon (ENST00000436063/ENSG00000067334, exon 2 of 7)
ENST00000569597	ENSG00000067365	METTL22	2.33	3' UTR
ENST00000411772	ENSG00000067369	TP53BP1	7.75	Exon (ENST00000382044/ENSG00000067369, exon 12 of 28)
ENST00000434561	ENSG00000067369	TP53BP1	2.62	3' UTR
ENST00000434595	ENSG00000067369	TP53BP1	2.39	3' UTR
ENST00000467474	ENSG00000067369	TP53BP1	2.87	3' UTR
ENST00000477089	ENSG00000067369	TP53BP1	3.15	3' UTR
ENST00000477089	ENSG00000067369	TP53BP1	7.98	3' UTR
ENST00000366932	ENSG00000067533	RRP15	5.03	3' UTR
ENST00000587574	ENSG00000067596	DHX8	9.39	3' UTR
ENST00000587574	ENSG00000067596	DHX8	17.6	3' UTR
ENST00000466651	ENSG00000067606	PRKCZ	4.27	Exon (ENST00000484419/ENSG00000067606, exon 2 of 2)
ENST00000472017	ENSG00000067606	PRKCZ	10.1	3' UTR
ENST00000467924	ENSG00000067704	IARS2	2.55	3' UTR
ENST00000549369	ENSG00000067798	NAV3	14.9	Exon (ENST00000550042/ENSG00000067798, exon 3 of 9)
ENST00000550673	ENSG00000067798	NAV3	9.41	Exon (ENST00000550042/ENSG00000067798, exon 8 of 9)
ENST00000552895	ENSG00000067798	NAV3	4.61	Exon (ENST00000397909/ENSG00000067798, exon 15 of 40)
ENST00000644176	ENSG00000067798	NAV3	10.6	5' UTR
ENST00000454076	ENSG00000067829	IDH3G	2.48	3' UTR
ENST00000322048	ENSG00000067836	ROGDI	5.98	5' UTR
ENST00000585871	ENSG00000067836	ROGDI	2.31	3' UTR
ENST00000585871	ENSG00000067836	ROGDI	3.03	3' UTR
ENST00000589543	ENSG00000067836	ROGDI	3.19	Exon (ENST00000322048/ENSG00000067836, exon 3 of 11)
ENST00000578051	ENSG00000067900	ROCK1	4.46	3' UTR
ENST00000578051	ENSG00000067900	ROCK1	6.06	3' UTR
ENST00000584875	ENSG00000067900	ROCK1	2.28	Exon (ENST00000399799/ENSG00000067900, exon 26 of 33)
ENST00000635540	ENSG00000067900	ROCK1	10.9	5' UTR
ENST00000290858	ENSG00000067955	CBFB	5.98	5' UTR
ENST00000447092	ENSG00000068001	HYAL2	10.9	3' UTR
ENST00000458018	ENSG00000068001	HYAL2	10	5' UTR
ENST00000430200	ENSG00000068024	HDAC4	8.55	3' UTR
ENST00000327761	ENSG00000068028	RASSF1	4.79	5' UTR
ENST00000395126	ENSG00000068028	RASSF1	13	5' UTR
ENST00000395126	ENSG00000068028	RASSF1	29.9	Exon (ENST00000629828/ENSG00000281358, exon 1 of 1)
ENST00000478619	ENSG00000068028	RASSF1	7.48	3' UTR
ENST00000469068	ENSG00000068078	FGFR3	2.42	3' UTR
ENST00000469068	ENSG00000068078	FGFR3	4.19	3' UTR
ENST00000469068	ENSG00000068078	FGFR3	7.31	3' UTR
ENST00000588757	ENSG00000068120	COASY	4.49	Exon (ENST00000588757/ENSG00000068120, exon 1 of 2)
ENST00000591583	ENSG00000068120	COASY	2.23	3' UTR
ENST00000591196	ENSG00000068137	PLEKHH3	11	5' UTR
ENST00000591476	ENSG00000068137	PLEKHH3	3.32	Exon (ENST00000591196/ENSG00000068137, exon 11 of 13)
ENST00000591476	ENSG00000068137	PLEKHH3	3.66	3' UTR
ENST00000591476	ENSG00000068137	PLEKHH3	28.7	3' UTR
ENST00000561125	ENSG00000068305	MEF2A	3.96	3' UTR
ENST00000561125	ENSG00000068305	MEF2A	11	3' UTR
ENST00000396743	ENSG00000068308	OTUD5	13.3	5' UTR
ENST00000455452	ENSG00000068308	OTUD5	2.19	Exon (ENST00000396743/ENSG00000068308, exon 1 of 10)
ENST00000315869	ENSG00000068323	TFE3	4.65	5' UTR
ENST00000495940	ENSG00000068323	TFE3	6.98	3' UTR
ENST00000340800	ENSG00000068366	ACSL4	7.98	5' UTR
ENST00000439581	ENSG00000068366	ACSL4	2.58	3' UTR
ENST00000505855	ENSG00000068366	ACSL4	2.54	5' UTR
ENST00000156109	ENSG00000068394	GPKOW	8.63	3' UTR
ENST00000489599	ENSG00000068438	FTSJ1	3.08	3' UTR
ENST00000578777	ENSG00000068489	PRR11	2.36	5' UTR
ENST00000614170	ENSG00000068650	ATP11A	5.11	3' UTR
ENST00000614170	ENSG00000068650	ATP11A	12.7	3' UTR
ENST00000263857	ENSG00000068654	POLR1A	5.48	5' UTR
ENST00000471427	ENSG00000068654	POLR1A	3.58	3' UTR
ENST00000471427	ENSG00000068654	POLR1A	5.65	3' UTR
ENST00000471427	ENSG00000068654	POLR1A	6.83	3' UTR
ENST00000471427	ENSG00000068654	POLR1A	11.4	3' UTR
ENST00000496892	ENSG00000068654	POLR1A	5.87	Exon (ENST00000263857/ENSG00000068654, exon 27 of 34)
ENST00000409245	ENSG00000068724	TTC7A	7.98	5' UTR
ENST00000496991	ENSG00000068724	TTC7A	2.42	Exon (ENST00000496991/ENSG00000068724, exon 3 of 3)
ENST00000496991	ENSG00000068724	TTC7A	2.59	3' UTR
ENST00000479914	ENSG00000068745	IP6K2	3.28	5' UTR
ENST00000479914	ENSG00000068745	IP6K2	5.48	Exon (ENST00000476645/ENSG00000068745, exon 2 of 2)
ENST00000491686	ENSG00000068745	IP6K2	20.7	3' UTR
ENST00000263736	ENSG00000068784	SRBD1	4.53	Exon (ENST00000263736/ENSG00000068784, exon 2 of 21)
ENST00000461805	ENSG00000068784	SRBD1	7.98	Exon (ENST00000461805/ENSG00000068784, exon 1 of 4)
ENST00000490133	ENSG00000068784	SRBD1	4.15	3' UTR
ENST00000490133	ENSG00000068784	SRBD1	9.09	3' UTR
ENST00000381103	ENSG00000068796	KIF2A	2.07	5' UTR
ENST00000381103	ENSG00000068796	KIF2A	2.07	5' UTR
ENST00000404125	ENSG00000068878	PSME4	24.4	5' UTR
ENST00000404125	ENSG00000068878	PSME4	34.4	5' UTR
ENST00000478278	ENSG00000068885	IFT80	2.42	3' UTR
ENST00000528530	ENSG00000068971	PPP2R5B	27.9	3' UTR
ENST00000532850	ENSG00000068971	PPP2R5B	2.21	5' UTR
ENST00000265340	ENSG00000069011	PITX1	3.42	Exon (ENST00000624272/ENSG00000224186, exon 1 of 6)
ENST00000503586	ENSG00000069011	PITX1	7.98	5' UTR
ENST00000504936	ENSG00000069011	PITX1	24	3' UTR
ENST00000443808	ENSG00000069020	MAST4	11	3' UTR
ENST00000443808	ENSG00000069020	MAST4	20.5	3' UTR
ENST00000367142	ENSG00000069275	NUCKS1	4.2	5' UTR
ENST00000464938	ENSG00000069275	NUCKS1	2.02	3' UTR
ENST00000464938	ENSG00000069275	NUCKS1	6.09	3' UTR
ENST00000568191	ENSG00000069329	VPS35	9.97	3' UTR
ENST00000569553	ENSG00000069345	DNAJA2	2.51	3' UTR
ENST00000617000	ENSG00000069345	DNAJA2	8.97	5' UTR
ENST00000428161	ENSG00000069424	KCNAB2	5.14	5' UTR
ENST00000493807	ENSG00000069424	KCNAB2	3.12	5' UTR
ENST00000656607	ENSG00000069424	KCNAB2	19.9	3' UTR
ENST00000662363	ENSG00000069424	KCNAB2	6.98	3' UTR
ENST00000671076	ENSG00000069424	KCNAB2	5.02	3' UTR
ENST00000671076	ENSG00000069424	KCNAB2	6.1	3' UTR
ENST00000483115	ENSG00000069509	FUNDC1	2.24	Exon (ENST00000483115/ENSG00000069509, exon 1 of 4)
ENST00000483115	ENSG00000069509	FUNDC1	4.86	3' UTR
ENST00000449337	ENSG00000069667	RORA	2.99	Exon (ENST00000660694/ENSG00000245534, exon 5 of 5)
ENST00000449337	ENSG00000069667	RORA	7.98	5' UTR
ENST00000559587	ENSG00000069667	RORA	4.35	3' UTR
ENST00000528733	ENSG00000069696	DRD4	11	3' UTR
ENST00000475483	ENSG00000069849	ATP1B3	5.19	5' UTR
ENST00000502612	ENSG00000069869	NEDD4	4.65	5' UTR
ENST00000503468	ENSG00000069869	NEDD4	12	5' UTR
ENST00000508871	ENSG00000069869	NEDD4	22.4	Exon (ENST00000508871/ENSG00000069869, exon 1 of 24)
ENST00000562751	ENSG00000069943	PIGB	8.89	3' UTR
ENST00000565367	ENSG00000069943	PIGB	18.6	3' UTR
ENST00000261837	ENSG00000069966	GNB5	6.31	3' UTR
ENST00000558122	ENSG00000069966	GNB5	7.31	3' UTR
ENST00000155674	ENSG00000069998	HDHD5	8.97	Exon (ENST00000329743/ENSG00000185837, exon 2 of 2)
ENST00000486462	ENSG00000069998	HDHD5	4.21	3' UTR
ENST00000261349	ENSG00000070018	LRP6	13	5' UTR
ENST00000540527	ENSG00000070018	LRP6	3.36	3' UTR
ENST00000540527	ENSG00000070018	LRP6	4.13	3' UTR
ENST00000545658	ENSG00000070018	LRP6	5.2	Exon (ENST00000261349/ENSG00000070018, exon 5 of 23)
ENST00000416188	ENSG00000070047	PHRF1	2.56	5' UTR
ENST00000532550	ENSG00000070047	PHRF1	2.88	Exon (ENST00000416188/ENSG00000070047, exon 14 of 18)
ENST00000532550	ENSG00000070047	PHRF1	6.42	Exon (ENST00000416188/ENSG00000070047, exon 14 of 18)
ENST00000532550	ENSG00000070047	PHRF1	21.7	3' UTR
ENST00000239940	ENSG00000070087	PFN2	7.98	5' UTR
ENST00000447271	ENSG00000070159	PTPN3	4.3	3' UTR
ENST00000447271	ENSG00000070159	PTPN3	4.99	3' UTR
ENST00000447271	ENSG00000070159	PTPN3	9.97	3' UTR
ENST00000556227	ENSG00000070182	SPTB	2.71	Exon (ENST00000644917/ENSG00000070182, exon 35 of 36)
ENST00000436716	ENSG00000070214	SLC44A1	8.1	3' UTR
ENST00000555046	ENSG00000070269	TMEM260	5.61	3' UTR
ENST00000263073	ENSG00000070366	SMG6	8.03	5' UTR
ENST00000574501	ENSG00000070366	SMG6	2.53	3' UTR
ENST00000554011	ENSG00000070367	EXOC5	3.2	3' UTR
ENST00000427926	ENSG00000070371	CLTCL1	33.4	3' UTR
ENST00000586042	ENSG00000070388	FGF22	6.98	3' UTR
ENST00000592947	ENSG00000070404	FSTL3	9.97	5' UTR
ENST00000605925	ENSG00000070404	FSTL3	17.6	3' UTR
ENST00000605925	ENSG00000070404	FSTL3	33.9	3' UTR
ENST00000537045	ENSG00000070413	DGCR2	11	Exon (ENST00000456035/ENSG00000223461, exon 1 of 2)
ENST00000586749	ENSG00000070423	RNF126	11	3' UTR
ENST00000174618	ENSG00000070444	MNT	3.99	5' UTR
ENST00000571232	ENSG00000070444	MNT	2.46	Exon (ENST00000174618/ENSG00000070444, exon 2 of 6)
ENST00000571232	ENSG00000070444	MNT	2.52	Exon (ENST00000174618/ENSG00000070444, exon 2 of 6)
ENST00000572892	ENSG00000070444	MNT	14	Exon (ENST00000174618/ENSG00000070444, exon 4 of 6)
ENST00000573384	ENSG00000070444	MNT	2.61	Exon (ENST00000573384/ENSG00000070444, exon 1 of 2)
ENST00000573384	ENSG00000070444	MNT	2.93	3' UTR
ENST00000573384	ENSG00000070444	MNT	3.24	3' UTR
ENST00000514463	ENSG00000070476	ZXDC	8.97	Exon (ENST00000514463/ENSG00000070476, exon 1 of 2)
ENST00000514463	ENSG00000070476	ZXDC	25.1	3' UTR
ENST00000397625	ENSG00000070495	JMJD6	3.48	5' UTR
ENST00000532157	ENSG00000070501	POLB	2.99	3' UTR
ENST00000592645	ENSG00000070540	WIPI1	4.99	3' UTR
ENST00000377765	ENSG00000070601	FRMPD1	5.83	3' UTR
ENST00000378088	ENSG00000070610	GBA2	8.27	3' UTR
ENST00000489025	ENSG00000070610	GBA2	17.5	5' UTR
ENST00000261797	ENSG00000070614	NDST1	5.48	5' UTR
ENST00000521752	ENSG00000070614	NDST1	2.44	3' UTR
ENST00000521752	ENSG00000070614	NDST1	17.9	3' UTR
ENST00000521752	ENSG00000070614	NDST1	18.9	3' UTR
ENST00000522491	ENSG00000070614	NDST1	2.17	5' UTR
ENST00000624156	ENSG00000070614	NDST1	2.66	Exon (ENST00000624156/ENSG00000070614, exon 1 of 1)
ENST00000487714	ENSG00000070669	ASNS	2.48	3' UTR
ENST00000487714	ENSG00000070669	ASNS	2.54	3' UTR
ENST00000520689	ENSG00000070718	AP3M2	9.56	3' UTR
ENST00000523249	ENSG00000070718	AP3M2	2.59	Exon (ENST00000517865/ENSG00000070718, exon 2 of 6)
ENST00000562443	ENSG00000070761	CFAP20	9.12	3' UTR
ENST00000563307	ENSG00000070770	CSNK2A2	3.89	3' UTR
ENST00000563307	ENSG00000070770	CSNK2A2	6.35	3' UTR
ENST00000553531	ENSG00000070778	PTPN21	2.66	3' UTR
ENST00000557249	ENSG00000070778	PTPN21	19.9	3' UTR
ENST00000360403	ENSG00000070785	EIF2B3	2.12	5' UTR
ENST00000506630	ENSG00000070814	TCOF1	3.16	3' UTR
ENST00000650162	ENSG00000070814	TCOF1	13	5' UTR
ENST00000648594	ENSG00000070831	CDC42	4.49	5' UTR
ENST00000648594	ENSG00000070831	CDC42	4.99	5' UTR
ENST00000648594	ENSG00000070831	CDC42	13.3	5' UTR
ENST00000429790	ENSG00000070950	RAD18	5.98	3' UTR
ENST00000359142	ENSG00000070961	ATP2B1	11.4	5' UTR
ENST00000550716	ENSG00000070961	ATP2B1	6.98	3' UTR
ENST00000550716	ENSG00000070961	ATP2B1	15.5	3' UTR
ENST00000393349	ENSG00000071051	NCK2	3.96	3' UTR
ENST00000393349	ENSG00000071051	NCK2	5.69	3' UTR
ENST00000491743	ENSG00000071054	MAP4K4	33.9	3' UTR
ENST00000441435	ENSG00000071082	RPL31	2.81	3' UTR
ENST00000496855	ENSG00000071189	SNX13	18.2	3' UTR
ENST00000510076	ENSG00000071205	ARHGAP10	8.63	3' UTR
ENST00000497502	ENSG00000071243	ING3	11.1	3' UTR
ENST00000497502	ENSG00000071243	ING3	13	3' UTR
ENST00000456506	ENSG00000071282	LMCD1	6.48	3' UTR
ENST00000456506	ENSG00000071282	LMCD1	40.9	3' UTR
ENST00000464615	ENSG00000071462	BUD23	6.81	3' UTR
ENST00000336735	ENSG00000071537	SEL1L	4.11	5' UTR
ENST00000554293	ENSG00000071537	SEL1L	21.8	3' UTR
ENST00000422890	ENSG00000071553	ATP6AP1	3.38	5' UTR
ENST00000586164	ENSG00000071564	TCF3	5.07	3' UTR
ENST00000405331	ENSG00000071575	TRIB2	7.64	5' UTR
ENST00000336761	ENSG00000071626	DAZAP1	5.98	5' UTR
ENST00000589484	ENSG00000071626	DAZAP1	7.98	Exon (ENST00000589484/ENSG00000071626, exon 1 of 10)
ENST00000589874	ENSG00000071626	DAZAP1	3.32	Exon (ENST00000589874/ENSG00000071626, exon 1 of 1)
ENST00000589874	ENSG00000071626	DAZAP1	5.12	3' UTR
ENST00000434436	ENSG00000071655	MBD3	7.01	3' UTR
ENST00000585967	ENSG00000071655	MBD3	17	5' UTR
ENST00000592012	ENSG00000071655	MBD3	174	5' UTR
ENST00000393600	ENSG00000071859	FAM50A	2.01	3' UTR
ENST00000393600	ENSG00000071859	FAM50A	5.98	5' UTR
ENST00000478509	ENSG00000071859	FAM50A	2.03	Exon (ENST00000393600/ENSG00000071859, exon 2 of 13)
ENST00000475657	ENSG00000071889	FAM3A	3.02	3' UTR
ENST00000538195	ENSG00000071994	PDCD2	15.5	3' UTR
ENST00000543284	ENSG00000071994	PDCD2	3.38	3' UTR
ENST00000589616	ENSG00000072071	ADGRL1	5.93	Exon (ENST00000340736/ENSG00000072071, exon 5 of 24)
ENST00000593005	ENSG00000072071	ADGRL1	6.13	3' UTR
ENST00000593005	ENSG00000072071	ADGRL1	17.6	3' UTR
ENST00000394419	ENSG00000072110	ACTN1	3.39	5' UTR
ENST00000553882	ENSG00000072110	ACTN1	3.24	3' UTR
ENST00000554557	ENSG00000072121	ZFYVE26	8.5	3' UTR
ENST00000557204	ENSG00000072121	ZFYVE26	5.11	3' UTR
ENST00000557306	ENSG00000072121	ZFYVE26	3.3	3' UTR
ENST00000347697	ENSG00000072134	EPN2	4.99	5' UTR
ENST00000395620	ENSG00000072134	EPN2	5.73	5' UTR
ENST00000395626	ENSG00000072134	EPN2	9.84	5' UTR
ENST00000495155	ENSG00000072134	EPN2	3.66	Exon (ENST00000441293/ENSG00000072134, exon 4 of 4)
ENST00000584954	ENSG00000072134	EPN2	5.78	3' UTR
ENST00000462321	ENSG00000072135	PTPN18	2.88	3' UTR
ENST00000410011	ENSG00000072163	LIMS2	5.48	3' UTR
ENST00000410011	ENSG00000072163	LIMS2	16	Exon (ENST00000322313/ENSG00000136709, exon 14 of 22)
ENST00000410011	ENSG00000072163	LIMS2	17.6	3' UTR
ENST00000410011	ENSG00000072163	LIMS2	27.4	3' UTR
ENST00000573505	ENSG00000072210	ALDH3A2	13	3' UTR
ENST00000573505	ENSG00000072210	ALDH3A2	19.9	3' UTR
ENST00000578469	ENSG00000072310	SREBF1	2.07	3' UTR
ENST00000578469	ENSG00000072310	SREBF1	6.98	3' UTR
ENST00000421773	ENSG00000072364	AFF4	9.38	5' UTR
ENST00000478588	ENSG00000072364	AFF4	4.47	Exon (ENST00000265343/ENSG00000072364, exon 10 of 21)
ENST00000606483	ENSG00000072401	UBE2D1	2.42	3' UTR
ENST00000554911	ENSG00000072415	MPP5	32.9	5' UTR
ENST00000557237	ENSG00000072415	MPP5	4.8	5' UTR
ENST00000557237	ENSG00000072415	MPP5	17.3	3' UTR
ENST00000483488	ENSG00000072422	RHOBTB1	5.58	Exon (ENST00000337910/ENSG00000072422, exon 6 of 11)
ENST00000469129	ENSG00000072501	SMC1A	6.48	3' UTR
ENST00000535116	ENSG00000072518	MARK2	2.91	3' UTR
ENST00000535116	ENSG00000072518	MARK2	3.06	3' UTR
ENST00000535116	ENSG00000072518	MARK2	6.63	3' UTR
ENST00000499045	ENSG00000072609	CHFR	6.13	3' UTR
ENST00000499045	ENSG00000072609	CHFR	9.03	3' UTR
ENST00000499045	ENSG00000072609	CHFR	15	3' UTR
ENST00000536932	ENSG00000072609	CHFR	4.49	3' UTR
ENST00000379104	ENSG00000072682	P4HA2	6.58	5' UTR
ENST00000431054	ENSG00000072682	P4HA2	9.2	5' UTR
ENST00000431054	ENSG00000072682	P4HA2	16.5	5' UTR
ENST00000565750	ENSG00000072736	NFATC3	3.02	Exon (ENST00000548144/ENSG00000261864, exon 3 of 3)
ENST00000565750	ENSG00000072736	NFATC3	18.4	3' UTR
ENST00000566893	ENSG00000072736	NFATC3	2.22	Exon (ENST00000553077/ENSG00000072736, exon 1 of 9)
ENST00000650814	ENSG00000072756	TRNT1	8.97	3' UTR
ENST00000651591	ENSG00000072756	TRNT1	3.99	5' UTR
ENST00000517360	ENSG00000072786	STK10	2.38	3' UTR
ENST00000517360	ENSG00000072786	STK10	9.46	3' UTR
ENST00000517775	ENSG00000072786	STK10	17.1	Exon (ENST00000176763/ENSG00000072786, exon 8 of 19)
ENST00000522879	ENSG00000072786	STK10	4.6	Exon (ENST00000176763/ENSG00000072786, exon 10 of 19)
ENST00000571471	ENSG00000072818	ACAP1	4.99	Exon (ENST00000158762/ENSG00000072818, exon 19 of 22)
ENST00000513911	ENSG00000072832	CRMP1	5.78	Exon (ENST00000513911/ENSG00000072832, exon 1 of 2)
ENST00000514919	ENSG00000072840	EVC	3.62	3' UTR
ENST00000514919	ENSG00000072840	EVC	10.7	3' UTR
ENST00000515113	ENSG00000072840	EVC	5.54	3' UTR
ENST00000515113	ENSG00000072840	EVC	9.97	3' UTR
ENST00000515113	ENSG00000072840	EVC	11.9	3' UTR
ENST00000571968	ENSG00000072849	DERL2	2.99	5' UTR
ENST00000573547	ENSG00000072849	DERL2	24.5	3' UTR
ENST00000574952	ENSG00000072849	DERL2	7.98	5' UTR
ENST00000572503	ENSG00000072864	NDE1	15.2	3' UTR
ENST00000674888	ENSG00000072864	NDE1	6.98	5' UTR
ENST00000592703	ENSG00000072958	AP1M1	3.57	3' UTR
ENST00000592703	ENSG00000072958	AP1M1	13	3' UTR
ENST00000598165	ENSG00000073050	XRCC1	7.98	5' UTR
ENST00000598165	ENSG00000073050	XRCC1	13	3' UTR
ENST00000545305	ENSG00000073060	SCARB1	9.86	3' UTR
ENST00000468414	ENSG00000073111	MCM2	7.07	3' UTR
ENST00000492092	ENSG00000073169	SELENOO	4.8	3' UTR
ENST00000611222	ENSG00000073169	SELENOO	6.68	3' UTR
ENST00000509209	ENSG00000073331	ALPK1	13	3' UTR
ENST00000512847	ENSG00000073331	ALPK1	8.54	3' UTR
ENST00000514594	ENSG00000073331	ALPK1	18.9	3' UTR
ENST00000167462	ENSG00000073350	LLGL2	6.48	5' UTR
ENST00000557957	ENSG00000073417	PDE8A	20.9	5' UTR
ENST00000561024	ENSG00000073417	PDE8A	12.8	3' UTR
ENST00000507522	ENSG00000073578	SDHA	2.34	3' UTR
ENST00000643318	ENSG00000073584	SMARCE1	2.99	3' UTR
ENST00000643318	ENSG00000073584	SMARCE1	26.3	Exon (ENST00000619697/ENSG00000278834, exon 1 of 1)
ENST00000643318	ENSG00000073584	SMARCE1	26.7	3' UTR
ENST00000399788	ENSG00000073614	KDM5A	4.37	5' UTR
ENST00000399788	ENSG00000073614	KDM5A	9.97	5' UTR
ENST00000535269	ENSG00000073614	KDM5A	2.09	Exon (ENST00000399788/ENSG00000073614, exon 19 of 28)
ENST00000540156	ENSG00000073614	KDM5A	5.22	Exon (ENST00000399788/ENSG00000073614, exon 22 of 28)
ENST00000540838	ENSG00000073614	KDM5A	4.94	3' UTR
ENST00000200557	ENSG00000073670	ADAM11	5.77	3' UTR
ENST00000588363	ENSG00000073670	ADAM11	2.28	3' UTR
ENST00000588363	ENSG00000073670	ADAM11	6.23	3' UTR
ENST00000334546	ENSG00000073711	PPP2R3A	3.49	5' UTR
ENST00000447251	ENSG00000073711	PPP2R3A	2.74	5' UTR
ENST00000469270	ENSG00000073711	PPP2R3A	11	3' UTR
ENST00000490467	ENSG00000073711	PPP2R3A	13.3	5' UTR
ENST00000382199	ENSG00000073792	IGF2BP2	3.75	5' UTR
ENST00000464166	ENSG00000073792	IGF2BP2	2.49	3' UTR
ENST00000464166	ENSG00000073792	IGF2BP2	18.6	3' UTR
ENST00000448876	ENSG00000073803	MAP3K13	2.22	5' UTR
ENST00000448449	ENSG00000073849	ST6GAL1	9.05	Exon (ENST00000169298/ENSG00000073849, exon 4 of 8)
ENST00000470633	ENSG00000073849	ST6GAL1	5.59	3' UTR
ENST00000470633	ENSG00000073849	ST6GAL1	6.56	3' UTR
ENST00000641614	ENSG00000073910	FRY	8.97	Exon (ENST00000645780/ENSG00000073910, exon 44 of 62)
ENST00000393346	ENSG00000073921	PICALM	17.5	5' UTR
ENST00000575068	ENSG00000073969	NSF	46.9	3' UTR
ENST00000472776	ENSG00000074054	CLASP1	2.58	3' UTR
ENST00000472776	ENSG00000074054	CLASP1	4.88	3' UTR
ENST00000177742	ENSG00000074071	MRPS34	11.3	3' UTR
ENST00000533957	ENSG00000074201	CLNS1A	2.19	3' UTR
ENST00000595233	ENSG00000074219	TEAD2	6.65	5' UTR
ENST00000528180	ENSG00000074266	EED	41.7	5' UTR
ENST00000508085	ENSG00000074276	CDHR2	9.97	Exon (ENST00000510636/ENSG00000074276, exon 21 of 32)
ENST00000580814	ENSG00000074319	TSG101	13	3' UTR
ENST00000389005	ENSG00000074356	NCBP3	3.24	3' UTR
ENST00000389005	ENSG00000074356	NCBP3	14.4	3' UTR
ENST00000572988	ENSG00000074356	NCBP3	13	3' UTR
ENST00000572988	ENSG00000074356	NCBP3	13	3' UTR
ENST00000574379	ENSG00000074356	NCBP3	2.35	3' UTR
ENST00000576523	ENSG00000074356	NCBP3	12.8	3' UTR
ENST00000576523	ENSG00000074356	NCBP3	19.6	3' UTR
ENST00000560666	ENSG00000074410	CA12	2.73	3' UTR
ENST00000560666	ENSG00000074410	CA12	5.07	3' UTR
ENST00000560666	ENSG00000074410	CA12	5.98	3' UTR
ENST00000560666	ENSG00000074410	CA12	12.3	3' UTR
ENST00000547980	ENSG00000074527	NTN4	32.9	5' UTR
ENST00000552603	ENSG00000074527	NTN4	5.98	3' UTR
ENST00000430322	ENSG00000074582	BCS1L	2.22	5' UTR
ENST00000443791	ENSG00000074582	BCS1L	2.24	5' UTR
ENST00000553094	ENSG00000074590	NUAK1	32.5	3' UTR
ENST00000341861	ENSG00000074603	DPP8	7.98	5' UTR
ENST00000560048	ENSG00000074603	DPP8	2.65	3' UTR
ENST00000560048	ENSG00000074603	DPP8	2.99	3' UTR
ENST00000560194	ENSG00000074603	DPP8	4.49	5' UTR
ENST00000399033	ENSG00000074621	SLC24A1	8.97	5' UTR
ENST00000505666	ENSG00000074621	SLC24A1	3.99	3' UTR
ENST00000505666	ENSG00000074621	SLC24A1	10.2	3' UTR
ENST00000505666	ENSG00000074621	SLC24A1	23	Exon (ENST00000434116/ENSG00000074621, exon 6 of 8)
ENST00000546330	ENSG00000074621	SLC24A1	3.75	Exon (ENST00000434116/ENSG00000074621, exon 3 of 8)
ENST00000570902	ENSG00000074660	SCARF1	10.5	3' UTR
ENST00000574545	ENSG00000074660	SCARF1	5.38	3' UTR
ENST00000520261	ENSG00000074706	IPCEF1	9.97	3' UTR
ENST00000520261	ENSG00000074706	IPCEF1	11	3' UTR
ENST00000572831	ENSG00000074755	ZZEF1	4.03	3' UTR
ENST00000572831	ENSG00000074755	ZZEF1	6.37	3' UTR
ENST00000645609	ENSG00000074800	ENO1	16	Exon (ENST00000442636/ENSG00000230679, exon 1 of 2)
ENST00000600711	ENSG00000074855	ANO8	3.74	Exon (ENST00000597643/ENSG00000074855, exon 1 of 18)
ENST00000600711	ENSG00000074855	ANO8	5.23	3' UTR
ENST00000600711	ENSG00000074855	ANO8	15	3' UTR
ENST00000495593	ENSG00000074964	ARHGEF10L	38.1	3' UTR
ENST00000264316	ENSG00000074966	TXK	11.6	3' UTR
ENST00000514937	ENSG00000074966	TXK	8.97	3' UTR
ENST00000562124	ENSG00000075131	TIPIN	17	5' UTR
ENST00000356916	ENSG00000075151	EIF4G3	5.98	5' UTR
ENST00000374933	ENSG00000075151	EIF4G3	3.32	Exon (ENST00000374935/ENSG00000075151, exon 11 of 33)
ENST00000485722	ENSG00000075151	EIF4G3	3.83	Exon (ENST00000264211/ENSG00000075151, exon 8 of 31)
ENST00000546385	ENSG00000075188	NUP37	2.08	3' UTR
ENST00000265362	ENSG00000075213	SEMA3A	14	3' UTR
ENST00000466510	ENSG00000075218	GTSE1	7.67	Exon (ENST00000454366/ENSG00000075218, exon 4 of 12)
ENST00000475955	ENSG00000075223	SEMA3C	7.38	3' UTR
ENST00000475955	ENSG00000075223	SEMA3C	7.98	3' UTR
ENST00000417709	ENSG00000075234	TTC38	5.93	3' UTR
ENST00000417709	ENSG00000075234	TTC38	10.5	3' UTR
ENST00000417709	ENSG00000075234	TTC38	10.7	3' UTR
ENST00000629918	ENSG00000075234	TTC38	8.97	Exon (ENST00000475467/ENSG00000075234, exon 2 of 2)
ENST00000672284	ENSG00000075239	ACAT1	10.3	3' UTR
ENST00000673000	ENSG00000075239	ACAT1	34.9	Exon (ENST00000531853/ENSG00000075239, exon 3 of 6)
ENST00000408031	ENSG00000075240	GRAMD4	8.48	3' UTR
ENST00000408031	ENSG00000075240	GRAMD4	8.53	3' UTR
ENST00000473624	ENSG00000075275	CELSR1	16	3' UTR
ENST00000460310	ENSG00000075292	ZNF638	7.75	3' UTR
ENST00000487638	ENSG00000075292	ZNF638	12	3' UTR
ENST00000493576	ENSG00000075292	ZNF638	11.2	Exon (ENST00000409544/ENSG00000075292, exon 21 of 28)
ENST00000494621	ENSG00000075292	ZNF638	13.1	5' UTR
ENST00000601581	ENSG00000075292	ZNF638	13.3	5' UTR
ENST00000579071	ENSG00000075336	TIMM21	5.8	3' UTR
ENST00000579071	ENSG00000075336	TIMM21	9.97	3' UTR
ENST00000580087	ENSG00000075336	TIMM21	2.68	5' UTR
ENST00000433130	ENSG00000075391	RASAL2	4.75	Exon (ENST00000367649/ENSG00000075391, exon 7 of 18)
ENST00000463079	ENSG00000075391	RASAL2	8.8	3' UTR
ENST00000389386	ENSG00000075399	VPS9D1	24.9	5' UTR
ENST00000561976	ENSG00000075399	VPS9D1	18.3	5' UTR
ENST00000565023	ENSG00000075399	VPS9D1	16.3	3' UTR
ENST00000638053	ENSG00000075407	ZNF37A	2.88	3' UTR
ENST00000638053	ENSG00000075407	ZNF37A	5.27	3' UTR
ENST00000555235	ENSG00000075413	MARK3	5.45	3' UTR
ENST00000547869	ENSG00000075415	SLC25A3	7.25	3' UTR
ENST00000415807	ENSG00000075420	FNDC3B	3.68	5' UTR
ENST00000264716	ENSG00000075426	FOSL2	6.98	5' UTR
ENST00000358350	ENSG00000075539	FRYL	3.32	5' UTR
ENST00000503339	ENSG00000075539	FRYL	2.28	3' UTR
ENST00000503339	ENSG00000075539	FRYL	30.7	3' UTR
ENST00000512297	ENSG00000075539	FRYL	9.44	3' UTR
ENST00000409721	ENSG00000075568	TMEM131	3.05	Exon (ENST00000186436/ENSG00000075568, exon 31 of 41)
ENST00000469447	ENSG00000075568	TMEM131	2.24	3' UTR
ENST00000485245	ENSG00000075568	TMEM131	6.98	Exon (ENST00000485245/ENSG00000075568, exon 1 of 2)
ENST00000473330	ENSG00000075618	FSCN1	2.02	3' UTR
ENST00000464611	ENSG00000075624	ACTB	2.14	3' UTR
ENST00000261326	ENSG00000075643	MOCOS	2.79	5' UTR
ENST00000463281	ENSG00000075651	PLD1	3.99	3' UTR
ENST00000463281	ENSG00000075651	PLD1	33.9	3' UTR
ENST00000489995	ENSG00000075651	PLD1	2.56	Exon (ENST00000460926/ENSG00000075651, exon 2 of 2)
ENST00000489995	ENSG00000075651	PLD1	8.97	Exon (ENST00000460926/ENSG00000075651, exon 2 of 2)
ENST00000378860	ENSG00000075702	WDR62	3.66	Exon (ENST00000586962/ENSG00000267698, exon 4 of 4)
ENST00000589953	ENSG00000075702	WDR62	8.97	Exon (ENST00000378860/ENSG00000075702, exon 10 of 10)
ENST00000664991	ENSG00000075711	DLG1	8.97	5' UTR
ENST00000667104	ENSG00000075711	DLG1	6.98	Exon (ENST00000414529/ENSG00000227375, exon 3 of 3)
ENST00000671246	ENSG00000075711	DLG1	14	5' UTR
ENST00000674593	ENSG00000075785	RAB7A	9.47	3' UTR
ENST00000485800	ENSG00000075826	SEC31B	11	3' UTR
ENST00000546815	ENSG00000075856	SART3	3.45	3' UTR
ENST00000546815	ENSG00000075856	SART3	19.9	3' UTR
ENST00000547397	ENSG00000075856	SART3	3.07	3' UTR
ENST00000554172	ENSG00000075891	PAX2	7.52	3' UTR
ENST00000554172	ENSG00000075891	PAX2	13	3' UTR
ENST00000367767	ENSG00000075945	KIFAP3	2.79	5' UTR
ENST00000448482	ENSG00000075975	MKRN2	4.24	3' UTR
ENST00000544196	ENSG00000076043	REXO2	2.18	5' UTR
ENST00000538134	ENSG00000076053	RBM7	7.48	3' UTR
ENST00000540163	ENSG00000076053	RBM7	2.83	3' UTR
ENST00000540163	ENSG00000076053	RBM7	3.1	5' UTR
ENST00000540163	ENSG00000076053	RBM7	3.72	5' UTR
ENST00000547647	ENSG00000076108	BAZ2A	3.95	Exon (ENST00000379441/ENSG00000076108, exon 3 of 30)
ENST00000553222	ENSG00000076108	BAZ2A	2.33	3' UTR
ENST00000495653	ENSG00000076201	PTPN23	2.71	3' UTR
ENST00000479505	ENSG00000076321	KLHL20	7.07	5' UTR
ENST00000488983	ENSG00000076321	KLHL20	5.28	3' UTR
ENST00000493170	ENSG00000076321	KLHL20	10.9	5' UTR
ENST00000481672	ENSG00000076344	RGS11	3.99	3' UTR
ENST00000582735	ENSG00000076351	SLC46A1	17.5	Exon (ENST00000612814/ENSG00000076351, exon 2 of 5)
ENST00000619923	ENSG00000076351	SLC46A1	4.99	Exon (ENST00000612814/ENSG00000076351, exon 3 of 5)
ENST00000619923	ENSG00000076351	SLC46A1	20.6	3' UTR
ENST00000367033	ENSG00000076356	PLXNA2	14.3	5' UTR
ENST00000460870	ENSG00000076356	PLXNA2	10.3	5' UTR
ENST00000483048	ENSG00000076356	PLXNA2	7.98	3' UTR
ENST00000483048	ENSG00000076356	PLXNA2	14.5	3' UTR
ENST00000483048	ENSG00000076356	PLXNA2	19.9	3' UTR
ENST00000580377	ENSG00000076382	SPAG5	3.34	3' UTR
ENST00000580567	ENSG00000076382	SPAG5	4.55	Exon (ENST00000321765/ENSG00000076382, exon 2 of 24)
ENST00000379096	ENSG00000076554	TPD52	4.32	5' UTR
ENST00000523319	ENSG00000076554	TPD52	2.77	5' UTR
ENST00000523319	ENSG00000076554	TPD52	2.79	3' UTR
ENST00000537279	ENSG00000076555	ACACB	3.74	3' UTR
ENST00000537279	ENSG00000076555	ACACB	15.6	3' UTR
ENST00000522811	ENSG00000076641	PAG1	6.98	Exon (ENST00000220597/ENSG00000076641, exon 4 of 9)
ENST00000523463	ENSG00000076641	PAG1	17.9	3' UTR
ENST00000523463	ENSG00000076641	PAG1	48.9	3' UTR
ENST00000170564	ENSG00000076650	GPATCH1	2.59	5' UTR
ENST00000589261	ENSG00000076662	ICAM3	3.32	5' UTR
ENST00000592439	ENSG00000076662	ICAM3	2.14	3' UTR
ENST00000592945	ENSG00000076662	ICAM3	2.53	Exon (ENST00000160262/ENSG00000076662, exon 5 of 7)
ENST00000592945	ENSG00000076662	ICAM3	8.4	3' UTR
ENST00000421281	ENSG00000076685	NT5C2	2.17	3' UTR
ENST00000465964	ENSG00000076770	MBNL3	22.9	3' UTR
ENST00000595692	ENSG00000076826	CAMSAP3	13.5	Exon (ENST00000160298/ENSG00000076826, exon 11 of 17)
ENST00000374763	ENSG00000076864	RAP1GAP	7.98	3' UTR
ENST00000374763	ENSG00000076864	RAP1GAP	8.23	3' UTR
ENST00000600230	ENSG00000076924	XAB2	5.19	3' UTR
ENST00000595770	ENSG00000076928	ARHGEF1	8.97	3' UTR
ENST00000595897	ENSG00000076928	ARHGEF1	6.48	Exon (ENST00000617585/ENSG00000076928, exon 4 of 4)
ENST00000598812	ENSG00000076928	ARHGEF1	2.99	Exon (ENST00000600387/ENSG00000076928, exon 4 of 4)
ENST00000598812	ENSG00000076928	ARHGEF1	14	Exon (ENST00000600387/ENSG00000076928, exon 4 of 4)
ENST00000599278	ENSG00000076944	STXBP2	3.16	3' UTR
ENST00000397981	ENSG00000076984	MAP2K7	3.14	3' UTR
ENST00000397981	ENSG00000076984	MAP2K7	10.6	3' UTR
ENST00000498118	ENSG00000076984	MAP2K7	5.05	3' UTR
ENST00000446636	ENSG00000077063	CTTNBP2	6.8	Exon (ENST00000160373/ENSG00000077063, exon 4 of 23)
ENST00000475717	ENSG00000077097	TOP2B	3.49	3' UTR
ENST00000371142	ENSG00000077147	TM9SF3	35.6	5' UTR
ENST00000443638	ENSG00000077147	TM9SF3	5.28	3' UTR
ENST00000601386	ENSG00000077150	NFKB2	7.8	3' UTR
ENST00000608999	ENSG00000077157	PPP1R12B	11	5' UTR
ENST00000618451	ENSG00000077157	PPP1R12B	3.59	3' UTR
ENST00000469118	ENSG00000077232	DNAJC10	4.9	5' UTR
ENST00000567806	ENSG00000077235	GTF3C1	3.03	3' UTR
ENST00000563886	ENSG00000077238	IL4R	22.7	3' UTR
ENST00000566117	ENSG00000077238	IL4R	9.97	Exon (ENST00000617035/ENSG00000274092, exon 1 of 1)
ENST00000481579	ENSG00000077254	USP33	2.16	Exon (ENST00000370794/ENSG00000077254, exon 10 of 24)
ENST00000601545	ENSG00000077312	SNRPA	9.86	3' UTR
ENST00000602129	ENSG00000077348	EXOSC5	3.7	3' UTR
ENST00000310300	ENSG00000077454	LRCH4	2.7	5' UTR
ENST00000398187	ENSG00000077458	FAM76B	7.98	5' UTR
ENST00000599394	ENSG00000077463	SIRT6	2.56	3' UTR
ENST00000532954	ENSG00000077514	POLD3	3.39	3' UTR
ENST00000532954	ENSG00000077514	POLD3	17.7	3' UTR
ENST00000264202	ENSG00000077549	CAPZB	14.6	5' UTR
ENST00000674299	ENSG00000077549	CAPZB	57	3' UTR
ENST00000508997	ENSG00000077684	JADE1	2.35	3' UTR
ENST00000508997	ENSG00000077684	JADE1	17	3' UTR
ENST00000508997	ENSG00000077684	JADE1	31.2	3' UTR
ENST00000628734	ENSG00000077721	UBE2A	6.16	3' UTR
ENST00000397091	ENSG00000077782	FGFR1	9.97	5' UTR
ENST00000526688	ENSG00000077782	FGFR1	2.13	3' UTR
ENST00000473543	ENSG00000078018	MAP2	6.98	3' UTR
ENST00000475600	ENSG00000078018	MAP2	6.98	Exon (ENST00000360351/ENSG00000078018, exon 7 of 15)
ENST00000585916	ENSG00000078043	PIAS2	15	5' UTR
ENST00000592212	ENSG00000078043	PIAS2	4.82	5' UTR
ENST00000470206	ENSG00000078061	ARAF	17.2	3' UTR
ENST00000464601	ENSG00000078070	MCCC1	2.16	3' UTR
ENST00000497959	ENSG00000078070	MCCC1	6.98	5' UTR
ENST00000510934	ENSG00000078140	UBE2K	148	5' UTR
ENST00000513269	ENSG00000078177	N4BP2	4.91	3' UTR
ENST00000513269	ENSG00000078177	N4BP2	9.86	3' UTR
ENST00000537251	ENSG00000078237	TIGAR	2.44	3' UTR
ENST00000537251	ENSG00000078237	TIGAR	7.34	3' UTR
ENST00000537251	ENSG00000078237	TIGAR	7.38	3' UTR
ENST00000635110	ENSG00000078237	TIGAR	2.67	3' UTR
ENST00000538704	ENSG00000078246	TULP3	9.03	3' UTR
ENST00000540184	ENSG00000078246	TULP3	2.22	3' UTR
ENST00000367112	ENSG00000078269	SYNJ2	2.09	3' UTR
ENST00000367112	ENSG00000078269	SYNJ2	37.3	3' UTR
ENST00000350249	ENSG00000078304	PPP2R5C	2.59	Exon (ENST00000554859/ENSG00000259088, exon 1 of 2)
ENST00000554147	ENSG00000078304	PPP2R5C	4.6	3' UTR
ENST00000556493	ENSG00000078304	PPP2R5C	13	Exon (ENST00000556068/ENSG00000078304, exon 4 of 4)
ENST00000676269	ENSG00000078319	PMS2P1	4.32	Exon (ENST00000676200/ENSG00000078319, exon 5 of 5)
ENST00000676269	ENSG00000078319	PMS2P1	28.9	Exon (ENST00000676200/ENSG00000078319, exon 5 of 5)
ENST00000610897	ENSG00000078369	GNB1	20.9	5' UTR
ENST00000487384	ENSG00000078399	HOXA9	4.66	Exon (ENST00000519694/ENSG00000253187, exon 2 of 2)
ENST00000497089	ENSG00000078399	HOXA9	2.1	Exon (ENST00000497089/ENSG00000078399, exon 1 of 2)
ENST00000497089	ENSG00000078399	HOXA9	2.12	Exon (ENST00000519935/ENSG00000253187, exon 2 of 3)
ENST00000377100	ENSG00000078403	MLLT10	24.4	5' UTR
ENST00000420525	ENSG00000078403	MLLT10	4.99	3' UTR
ENST00000468309	ENSG00000078403	MLLT10	4.49	3' UTR
ENST00000479315	ENSG00000078487	ZCWPW1	15	3' UTR
ENST00000354831	ENSG00000078618	NRDC	39.9	5' UTR
ENST00000485608	ENSG00000078618	NRDC	5.21	5' UTR
ENST00000520115	ENSG00000078668	VDAC3	6.98	5' UTR
ENST00000588549	ENSG00000078687	TNRC6C	14	5' UTR
ENST00000592566	ENSG00000078687	TNRC6C	6.98	3' UTR
ENST00000592566	ENSG00000078687	TNRC6C	12	3' UTR
ENST00000592566	ENSG00000078687	TNRC6C	13	3' UTR
ENST00000636222	ENSG00000078687	TNRC6C	2.74	5' UTR
ENST00000543126	ENSG00000078699	CBFA2T2	6.73	3' UTR
ENST00000543126	ENSG00000078699	CBFA2T2	8.97	3' UTR
ENST00000543126	ENSG00000078699	CBFA2T2	21.8	3' UTR
ENST00000511176	ENSG00000078795	PKD2L2	23.8	3' UTR
ENST00000414082	ENSG00000078804	TP53INP2	3.03	3' UTR
ENST00000478938	ENSG00000078808	SDF4	14	Exon (ENST00000494748/ENSG00000078808, exon 1 of 3)
ENST00000528719	ENSG00000078902	TOLLIP	2.54	3' UTR
ENST00000528719	ENSG00000078902	TOLLIP	3.24	3' UTR
ENST00000528719	ENSG00000078902	TOLLIP	3.27	3' UTR
ENST00000528719	ENSG00000078902	TOLLIP	7.98	3' UTR
ENST00000491770	ENSG00000078967	UBE2D4	2.52	3' UTR
ENST00000491770	ENSG00000078967	UBE2D4	3.9	3' UTR
ENST00000491770	ENSG00000078967	UBE2D4	6.32	3' UTR
ENST00000491770	ENSG00000078967	UBE2D4	7.14	3' UTR
ENST00000577429	ENSG00000079134	THOC1	5.55	3' UTR
ENST00000583228	ENSG00000079134	THOC1	12.7	3' UTR
ENST00000424785	ENSG00000079150	FKBP7	2.74	Exon (ENST00000342992/ENSG00000155657, exon 275 of 312)
ENST00000424785	ENSG00000079150	FKBP7	2.9	Exon (ENST00000342992/ENSG00000155657, exon 304 of 312)
ENST00000424785	ENSG00000079150	FKBP7	2.91	Exon (ENST00000342992/ENSG00000155657, exon 307 of 312)
ENST00000424785	ENSG00000079150	FKBP7	3.32	3' UTR
ENST00000424785	ENSG00000079150	FKBP7	3.66	Exon (ENST00000342992/ENSG00000155657, exon 275 of 312)
ENST00000424785	ENSG00000079150	FKBP7	3.88	Exon (ENST00000342992/ENSG00000155657, exon 306 of 312)
ENST00000424785	ENSG00000079150	FKBP7	3.99	Exon (ENST00000342992/ENSG00000155657, exon 288 of 312)
ENST00000424785	ENSG00000079150	FKBP7	4.39	Exon (ENST00000342992/ENSG00000155657, exon 307 of 312)
ENST00000424785	ENSG00000079150	FKBP7	4.56	Exon (ENST00000342992/ENSG00000155657, exon 307 of 312)
ENST00000424785	ENSG00000079150	FKBP7	5.48	Exon (ENST00000342992/ENSG00000155657, exon 290 of 312)
ENST00000424785	ENSG00000079150	FKBP7	5.56	3' UTR
ENST00000424785	ENSG00000079150	FKBP7	5.7	Exon (ENST00000342992/ENSG00000155657, exon 284 of 312)
ENST00000424785	ENSG00000079150	FKBP7	6.28	Exon (ENST00000342992/ENSG00000155657, exon 301 of 312)
ENST00000424785	ENSG00000079150	FKBP7	6.81	Exon (ENST00000342992/ENSG00000155657, exon 307 of 312)
ENST00000424785	ENSG00000079150	FKBP7	7.15	Exon (ENST00000342992/ENSG00000155657, exon 275 of 312)
ENST00000424785	ENSG00000079150	FKBP7	7.98	Exon (ENST00000342992/ENSG00000155657, exon 275 of 312)
ENST00000424785	ENSG00000079150	FKBP7	9.97	Exon (ENST00000342992/ENSG00000155657, exon 275 of 312)
ENST00000506178	ENSG00000079215	SLC1A3	8.01	3' UTR
ENST00000514563	ENSG00000079215	SLC1A3	16	Exon (ENST00000416645/ENSG00000079215, exon 3 of 3)
ENST00000392133	ENSG00000079246	XRCC5	11	3' UTR
ENST00000479539	ENSG00000079263	SP140	8.97	3' UTR
ENST00000341183	ENSG00000079277	MKNK1	3.73	3' UTR
ENST00000341183	ENSG00000079277	MKNK1	9.97	3' UTR
ENST00000531769	ENSG00000079277	MKNK1	13	5' UTR
ENST00000446688	ENSG00000079308	TNS1	2.64	Exon (ENST00000646520/ENSG00000079308, exon 19 of 33)
ENST00000446688	ENSG00000079308	TNS1	3.68	Exon (ENST00000646520/ENSG00000079308, exon 19 of 33)
ENST00000480416	ENSG00000079308	TNS1	10.6	3' UTR
ENST00000170168	ENSG00000079313	REXO1	2.15	3' UTR
ENST00000170168	ENSG00000079313	REXO1	3.58	3' UTR
ENST00000170168	ENSG00000079313	REXO1	5.19	3' UTR
ENST00000587524	ENSG00000079313	REXO1	24.1	5' UTR
ENST00000452767	ENSG00000079332	SAR1A	8.55	3' UTR
ENST00000395360	ENSG00000079337	RAPGEF3	4.49	3' UTR
ENST00000490387	ENSG00000079337	RAPGEF3	33.9	3' UTR
ENST00000491677	ENSG00000079393	DUSP13	23.7	5' UTR
ENST00000571033	ENSG00000079432	CIC	2.87	3' UTR
ENST00000571942	ENSG00000079432	CIC	8.97	5' UTR
ENST00000571942	ENSG00000079432	CIC	13	Exon (ENST00000572681/ENSG00000079432, exon 2 of 21)
ENST00000573349	ENSG00000079432	CIC	8.23	Exon (ENST00000572681/ENSG00000079432, exon 11 of 21)
ENST00000244289	ENSG00000079435	LIPE	17.9	Exon (ENST00000594688/ENSG00000213904, exon 1 of 2)
ENST00000597620	ENSG00000079435	LIPE	2.29	Exon (ENST00000593491/ENSG00000213904, exon 1 of 2)
ENST00000600224	ENSG00000079435	LIPE	6.48	3' UTR
ENST00000601189	ENSG00000079435	LIPE	3.56	5' UTR
ENST00000602000	ENSG00000079435	LIPE	5.98	5' UTR
ENST00000525551	ENSG00000079459	FDFT1	3.09	3' UTR
ENST00000529521	ENSG00000079459	FDFT1	2.19	3' UTR
ENST00000473117	ENSG00000079739	PGM1	2.22	5' UTR
ENST00000617198	ENSG00000079785	DDX1	2.59	5' UTR
ENST00000591818	ENSG00000079805	DNM2	3.99	3' UTR
ENST00000591818	ENSG00000079805	DNM2	11.3	3' UTR
ENST00000525193	ENSG00000079819	EPB41L2	5.4	5' UTR
ENST00000526782	ENSG00000079819	EPB41L2	5.4	3' UTR
ENST00000465063	ENSG00000079974	RABL2B	17.9	3' UTR
ENST00000590237	ENSG00000079999	KEAP1	13.1	3' UTR
ENST00000592478	ENSG00000079999	KEAP1	2.74	3' UTR
ENST00000586310	ENSG00000080031	PTPRH	9.97	Exon (ENST00000376350/ENSG00000080031, exon 10 of 20)
ENST00000317734	ENSG00000080189	SLC35C2	6.1	3' UTR
ENST00000317734	ENSG00000080189	SLC35C2	7.48	3' UTR
ENST00000372227	ENSG00000080189	SLC35C2	11	5' UTR
ENST00000493599	ENSG00000080189	SLC35C2	2.2	3' UTR
ENST00000493599	ENSG00000080189	SLC35C2	6.32	3' UTR
ENST00000493599	ENSG00000080189	SLC35C2	7.71	3' UTR
ENST00000493599	ENSG00000080189	SLC35C2	16	3' UTR
ENST00000493599	ENSG00000080189	SLC35C2	21.4	3' UTR
ENST00000389622	ENSG00000080200	CRYBG3	19.6	Exon (ENST00000389622/ENSG00000080200, exon 1 of 22)
ENST00000485253	ENSG00000080200	CRYBG3	2.79	3' UTR
ENST00000485253	ENSG00000080200	CRYBG3	6.89	3' UTR
ENST00000495403	ENSG00000080200	CRYBG3	2.08	Exon (ENST00000389622/ENSG00000080200, exon 4 of 22)
ENST00000495403	ENSG00000080200	CRYBG3	6.46	Exon (ENST00000389622/ENSG00000080200, exon 4 of 22)
ENST00000449234	ENSG00000080298	RFX3	7.98	3' UTR
ENST00000449234	ENSG00000080298	RFX3	7.98	3' UTR
ENST00000454583	ENSG00000080345	RIF1	4.03	Exon (ENST00000453091/ENSG00000080345, exon 30 of 35)
ENST00000454583	ENSG00000080345	RIF1	6.76	Exon (ENST00000453091/ENSG00000080345, exon 30 of 35)
ENST00000454583	ENSG00000080345	RIF1	13.2	3' UTR
ENST00000457745	ENSG00000080345	RIF1	3.74	3' UTR
ENST00000457745	ENSG00000080345	RIF1	4.49	3' UTR
ENST00000457745	ENSG00000080345	RIF1	8.23	3' UTR
ENST00000261263	ENSG00000080371	RAB21	9.06	5' UTR
ENST00000552686	ENSG00000080371	RAB21	2.91	3' UTR
ENST00000635226	ENSG00000080503	SMARCA2	8.77	3' UTR
ENST00000436639	ENSG00000080546	SESN1	20.9	5' UTR
ENST00000520364	ENSG00000080546	SESN1	3.32	3' UTR
ENST00000443968	ENSG00000080561	MID2	11.4	5' UTR
ENST00000451923	ENSG00000080561	MID2	5.98	5' UTR
ENST00000474008	ENSG00000080603	SRCAP	6.18	3' UTR
ENST00000474008	ENSG00000080603	SRCAP	6.22	3' UTR
ENST00000474008	ENSG00000080603	SRCAP	8.3	Exon (ENST00000262518/ENSG00000080603, exon 32 of 34)
ENST00000474008	ENSG00000080603	SRCAP	8.58	Exon (ENST00000262518/ENSG00000080603, exon 32 of 34)
ENST00000397885	ENSG00000080608	PUM3	3.17	5' UTR
ENST00000490444	ENSG00000080608	PUM3	2.52	3' UTR
ENST00000558903	ENSG00000080644	CHRNA3	14.3	Exon (ENST00000559658/ENSG00000080644, exon 4 of 8)
ENST00000473470	ENSG00000080802	CNOT4	5.48	3' UTR
ENST00000473470	ENSG00000080802	CNOT4	9.31	3' UTR
ENST00000555867	ENSG00000080815	PSEN1	13	3' UTR
ENST00000506885	ENSG00000080822	CLDND1	2.02	5' UTR
ENST00000521937	ENSG00000080823	MOK	2.54	3' UTR
ENST00000521937	ENSG00000080823	MOK	2.92	3' UTR
ENST00000521937	ENSG00000080823	MOK	3.16	Exon (ENST00000521249/ENSG00000080823, exon 1 of 2)
ENST00000521937	ENSG00000080823	MOK	17.9	3' UTR
ENST00000559512	ENSG00000080823	MOK	11	3' UTR
ENST00000559512	ENSG00000080823	MOK	12.5	3' UTR
ENST00000216281	ENSG00000080824	HSP90AA1	2.52	3' UTR
ENST00000557234	ENSG00000080824	HSP90AA1	6.98	Exon (ENST00000334701/ENSG00000080824, exon 1 of 12)
ENST00000564347	ENSG00000080854	IGSF9B	4.32	Exon (ENST00000533871/ENSG00000080854, exon 18 of 20)
ENST00000564347	ENSG00000080854	IGSF9B	6.27	Exon (ENST00000533871/ENSG00000080854, exon 18 of 20)
ENST00000574096	ENSG00000080986	NDC80	3.21	3' UTR
ENST00000561397	ENSG00000081014	AP4E1	3.86	3' UTR
ENST00000561397	ENSG00000081014	AP4E1	5.98	3' UTR
ENST00000561441	ENSG00000081014	AP4E1	16	5' UTR
ENST00000261441	ENSG00000081019	RSBN1	11	5' UTR
ENST00000369581	ENSG00000081019	RSBN1	2.05	3' UTR
ENST00000369581	ENSG00000081019	RSBN1	12.5	3' UTR
ENST00000616024	ENSG00000081019	RSBN1	13.3	3' UTR
ENST00000307546	ENSG00000081026	MAGI3	2.66	5' UTR
ENST00000477955	ENSG00000081026	MAGI3	3.13	Exon (ENST00000477955/ENSG00000081026, exon 2 of 2)
ENST00000520699	ENSG00000081059	TCF7	2.86	3' UTR
ENST00000520699	ENSG00000081059	TCF7	3.99	3' UTR
ENST00000520699	ENSG00000081059	TCF7	5.98	3' UTR
ENST00000193322	ENSG00000081087	OSTM1	8.97	5' UTR
ENST00000193391	ENSG00000081148	IMPG2	8.97	3' UTR
ENST00000409018	ENSG00000081177	EXD2	3.32	5' UTR
ENST00000465286	ENSG00000081177	EXD2	11.7	3' UTR
ENST00000480955	ENSG00000081307	UBA5	7.61	5' UTR
ENST00000480955	ENSG00000081307	UBA5	12.7	5' UTR
ENST00000606789	ENSG00000081320	STK17B	3.28	3' UTR
ENST00000606789	ENSG00000081320	STK17B	7.98	3' UTR
ENST00000481149	ENSG00000081377	CDC14B	3.65	3' UTR
ENST00000481149	ENSG00000081377	CDC14B	3.99	3' UTR
ENST00000481149	ENSG00000081377	CDC14B	4.36	3' UTR
ENST00000481149	ENSG00000081377	CDC14B	6.98	3' UTR
ENST00000223428	ENSG00000081386	ZNF510	9.97	5' UTR
ENST00000472201	ENSG00000081386	ZNF510	5.65	3' UTR
ENST00000472201	ENSG00000081386	ZNF510	27.7	3' UTR
ENST00000465251	ENSG00000081692	JMJD4	2.38	3' UTR
ENST00000465251	ENSG00000081692	JMJD4	5.52	3' UTR
ENST00000465251	ENSG00000081692	JMJD4	6.61	Exon (ENST00000485807/ENSG00000081692, exon 1 of 2)
ENST00000485807	ENSG00000081692	JMJD4	11.7	Exon (ENST00000485807/ENSG00000081692, exon 1 of 2)
ENST00000463365	ENSG00000081721	DUSP12	2.03	3' UTR
ENST00000509110	ENSG00000081791	DELE1	10.7	3' UTR
ENST00000194152	ENSG00000081818	PCDHB4	8.97	Exon (ENST00000623478/ENSG00000081818, exon 1 of 2)
ENST00000194152	ENSG00000081818	PCDHB4	11	Exon (ENST00000623478/ENSG00000081818, exon 2 of 2)
ENST00000623478	ENSG00000081818	PCDHB4	18.9	Exon (ENST00000607216/ENSG00000272154, exon 1 of 2)
ENST00000394576	ENSG00000081853	PCDHGA2	47.9	5' UTR
ENST00000262719	ENSG00000081913	PHLPP1	2.99	5' UTR
ENST00000262719	ENSG00000081913	PHLPP1	17.9	Exon (ENST00000262719/ENSG00000081913, exon 1 of 17)
ENST00000497351	ENSG00000081913	PHLPP1	2.81	Exon (ENST00000262719/ENSG00000081913, exon 1 of 17)
ENST00000591106	ENSG00000081913	PHLPP1	6.62	3' UTR
ENST00000588255	ENSG00000081923	ATP8B1	2.99	Exon (ENST00000591854/ENSG00000267040, exon 2 of 3)
ENST00000648467	ENSG00000081923	ATP8B1	14	5' UTR
ENST00000648467	ENSG00000081923	ATP8B1	15	Exon (ENST00000588925/ENSG00000267787, exon 3 of 6)
ENST00000262188	ENSG00000082014	SMARCD3	3.99	5' UTR
ENST00000508730	ENSG00000082068	WDR70	3.99	3' UTR
ENST00000315506	ENSG00000082126	MPP4	7.72	3' UTR
ENST00000315506	ENSG00000082126	MPP4	8.82	3' UTR
ENST00000591925	ENSG00000082212	ME2	4.49	Exon (ENST00000591925/ENSG00000082212, exon 1 of 2)
ENST00000510530	ENSG00000082213	C5orf22	5.1	3' UTR
ENST00000438691	ENSG00000082258	CCNT2	2.85	3' UTR
ENST00000438691	ENSG00000082258	CCNT2	23.2	3' UTR
ENST00000493713	ENSG00000082438	COBLL1	11.8	Exon (ENST00000392717/ENSG00000082438, exon 13 of 15)
ENST00000374355	ENSG00000082458	DLG3	3.99	5' UTR
ENST00000496931	ENSG00000082458	DLG3	4.71	3' UTR
ENST00000496931	ENSG00000082458	DLG3	5.93	3' UTR
ENST00000367012	ENSG00000082497	SERTAD4	5.48	Exon (ENST00000475406/ENSG00000203706, exon 1 of 2)
ENST00000473385	ENSG00000082512	TRAF5	14.2	3' UTR
ENST00000473385	ENSG00000082512	TRAF5	24	3' UTR
ENST00000523037	ENSG00000082515	MRPL22	2.67	5' UTR
ENST00000522075	ENSG00000082516	GEMIN5	10.9	3' UTR
ENST00000579889	ENSG00000082641	NFE2L1	15.1	5' UTR
ENST00000581319	ENSG00000082641	NFE2L1	5.71	3' UTR
ENST00000581319	ENSG00000082641	NFE2L1	13.2	3' UTR
ENST00000264235	ENSG00000082701	GSK3B	15.6	5' UTR
ENST00000296181	ENSG00000082781	ITGB5	11.3	5' UTR
ENST00000460797	ENSG00000082781	ITGB5	3.69	3' UTR
ENST00000538971	ENSG00000082805	ERC1	9.55	5' UTR
ENST00000543151	ENSG00000082805	ERC1	2.34	3' UTR
ENST00000587595	ENSG00000082805	ERC1	6.32	5' UTR
ENST00000401558	ENSG00000082898	XPO1	11.7	5' UTR
ENST00000344229	ENSG00000082996	RNF13	5.98	5' UTR
ENST00000493238	ENSG00000082996	RNF13	3.58	3' UTR
ENST00000565038	ENSG00000083093	PALB2	13.6	3' UTR
ENST00000484282	ENSG00000083097	DOP1A	7.95	Exon (ENST00000237163/ENSG00000083097, exon 20 of 40)
ENST00000484282	ENSG00000083097	DOP1A	12	Exon (ENST00000237163/ENSG00000083097, exon 21 of 40)
ENST00000493541	ENSG00000083097	DOP1A	6.28	Exon (ENST00000237163/ENSG00000083097, exon 15 of 40)
ENST00000517396	ENSG00000083099	LYRM2	4.58	3' UTR
ENST00000517396	ENSG00000083099	LYRM2	10.8	3' UTR
ENST00000647809	ENSG00000083168	KAT6A	19.4	5' UTR
ENST00000648224	ENSG00000083168	KAT6A	2.69	3' UTR
ENST00000648224	ENSG00000083168	KAT6A	3.33	3' UTR
ENST00000648224	ENSG00000083168	KAT6A	3.94	3' UTR
ENST00000648224	ENSG00000083168	KAT6A	7.09	3' UTR
ENST00000648224	ENSG00000083168	KAT6A	23.8	3' UTR
ENST00000277141	ENSG00000083223	TUT7	12.9	5' UTR
ENST00000469004	ENSG00000083223	TUT7	8.23	5' UTR
ENST00000570983	ENSG00000083290	ULK2	2.78	3' UTR
ENST00000570983	ENSG00000083290	ULK2	5.32	3' UTR
ENST00000570983	ENSG00000083290	ULK2	17.9	3' UTR
ENST00000503084	ENSG00000083312	TNPO1	10.5	3' UTR
ENST00000481933	ENSG00000083444	PLOD1	11	3' UTR
ENST00000345901	ENSG00000083454	P2RX5	2.99	5' UTR
ENST00000570415	ENSG00000083457	ITGAE	2.02	Exon (ENST00000263087/ENSG00000083457, exon 25 of 31)
ENST00000571185	ENSG00000083457	ITGAE	7.98	Exon (ENST00000263087/ENSG00000083457, exon 21 of 31)
ENST00000571937	ENSG00000083457	ITGAE	4.49	Exon (ENST00000571937/ENSG00000083457, exon 1 of 2)
ENST00000490646	ENSG00000083520	DIS3	2.51	3' UTR
ENST00000490646	ENSG00000083520	DIS3	3.76	3' UTR
ENST00000490646	ENSG00000083520	DIS3	4.42	3' UTR
ENST00000471710	ENSG00000083544	TDRD3	3.01	3' UTR
ENST00000379161	ENSG00000083635	NUFIP1	5.78	3' UTR
ENST00000315596	ENSG00000083642	PDS5B	22.6	5' UTR
ENST00000474274	ENSG00000083642	PDS5B	2.05	3' UTR
ENST00000474274	ENSG00000083642	PDS5B	6.34	3' UTR
ENST00000563629	ENSG00000083799	CYLD	8.11	5' UTR
ENST00000566024	ENSG00000083799	CYLD	6.67	3' UTR
ENST00000569418	ENSG00000083799	CYLD	11.5	5' UTR
ENST00000593745	ENSG00000083807	SLC27A5	9.22	3' UTR
ENST00000593925	ENSG00000083812	ZNF324	14.7	Exon (ENST00000535298/ENSG00000083812, exon 3 of 5)
ENST00000196489	ENSG00000083817	ZNF416	10.9	3' UTR
ENST00000196489	ENSG00000083817	ZNF416	14.3	Exon (ENST00000196489/ENSG00000083817, exon 3 of 4)
ENST00000396150	ENSG00000083828	ZNF586	12.5	3' UTR
ENST00000396150	ENSG00000083828	ZNF586	42.9	3' UTR
ENST00000391694	ENSG00000083838	ZNF446	44.9	3' UTR
ENST00000594468	ENSG00000083838	ZNF446	28.9	3' UTR
ENST00000594468	ENSG00000083838	ZNF446	51.9	3' UTR
ENST00000596341	ENSG00000083838	ZNF446	24.9	3' UTR
ENST00000536056	ENSG00000083844	ZNF264	4.1	3' UTR
ENST00000536056	ENSG00000083844	ZNF264	23.8	3' UTR
ENST00000503253	ENSG00000083857	FAT1	7.54	Exon (ENST00000441802/ENSG00000083857, exon 18 of 27)
ENST00000508035	ENSG00000083857	FAT1	2.61	Exon (ENST00000441802/ENSG00000083857, exon 14 of 27)
ENST00000508035	ENSG00000083857	FAT1	8.8	Exon (ENST00000441802/ENSG00000083857, exon 10 of 27)
ENST00000508035	ENSG00000083857	FAT1	10.5	Exon (ENST00000441802/ENSG00000083857, exon 9 of 27)
ENST00000508035	ENSG00000083857	FAT1	14.6	Exon (ENST00000441802/ENSG00000083857, exon 10 of 27)
[truncated: 25,853 more rows]

## Sheet: RIP_expression
Geneid	IP_PValue	IP_logFC
5S_rRNA	0.0128237	0.906052
A1BG	0.000200837	2.42643
A1BG-AS1	8.39452e-18	2.48567
A2M-AS1	0.00607118	1.41991
AAMP	0.0317955	0.448937
AAR2	8.94062e-23	2.3762
AARS1	4.21174e-07	1.05111
AARS2	2.08996e-17	1.87502
AARSD1	0.164566	0.306357
AASDH	9.79689e-10	1.54277
AASS	0.96958	0.00935719
AATF	0.503578	0.139208
AATK	0.000608709	1.87296
ABALON	3.40224e-16	1.72989
ABAT	6.48096e-14	1.73162
ABCA1	0.13189	0.7725
ABCA11P	4.84869e-18	2.03244
ABCA17P	1.1639e-09	2.41296
ABCA3	0.493987	0.143851
ABCA7	0.710226	0.0856608
ABCB10	0.560745	0.132499
ABCB8	0.00663917	0.655894
ABCB9	0.228558	0.257741
ABCC1	5.44911e-05	0.850894
ABCC10	0.000114199	0.998296
ABCC6	0.00277966	1.43978
ABCD1	3.37474e-05	0.900553
ABCD4	8.07419e-06	0.95456
ABCF1	2.42538e-07	1.1082
ABCF2	0.000126462	0.796431
ABCF2-H2BE1	0.00633223	0.567243
ABCF3	0.00383451	0.651118
ABCG4	1.44707e-05	1.49363
ABHD1	0.870326	0.0536243
ABHD10	0.386095	0.186794
ABHD11	2.77155e-19	2.03229
ABHD11-AS1	0.000602715	1.69648
ABHD12	3.41e-09	1.27598
ABHD13	1.08461e-10	1.4128
ABHD14A	0.0281314	0.580525
ABHD14A-ACY1	0.00508104	0.65392
ABHD15	2.93639e-39	3.02082
ABHD16A	0.616888	0.113648
ABHD16B	3.02175e-35	3.18039
ABHD17A	1.12006e-07	1.16808
ABHD17B	1.55282e-06	1.24106
ABHD17C	0.000114671	0.945176
ABHD4	0.0190429	0.579505
ABHD6	9.09894e-05	0.885671
ABHD8	1.41822e-11	1.79391
ABL1	9.82919e-12	1.43475
ABL2	1.07517e-08	1.1925
ABLIM2	0.17783	0.591753
ABO	6.18627e-07	1.4048
ABR	1.69698e-09	1.27238
ABRAXAS2	6.95681e-23	2.17265
ABT1	1.69205e-10	1.39472
ABTB1	0.00462923	0.829333
ABTB2	1.46055e-07	1.33152
AC000068.1	2.14958e-10	2.89925
AC000093.1	7.0413e-07	1.29597
AC001226.2	0.00313624	0.671856
AC002070.1	0.020365	1.08621
AC002094.1	0.115727	0.386302
AC002094.2	4.39415e-05	1.04653
AC002116.1	0.506434	0.248016
AC002310.1	0.000695508	0.960231
AC002310.2	5.7584e-07	1.51721
AC002310.4	2.90898e-22	2.14671
AC002310.5	0.00360939	1.59016
AC002347.2	2.15572e-11	2.25667
AC002350.2	0.0640499	0.467321
AC002401.1	1.65646e-06	1.06954
AC002467.1	4.6841e-11	1.60329
AC002470.1	4.67603e-05	3.03394
AC002470.2	3.4151e-08	1.29741
AC002550.1	4.89201e-26	2.55237
AC002985.1	0.173519	0.285182
AC002996.1	0.154608	0.343676
AC003002.1	2.14286e-14	2.39751
AC003002.2	0.156318	0.608853
AC003002.3	5.63442e-23	3.02911
AC003005.1	0.000126865	1.20989
AC003006.1	9.65753e-14	1.92863
AC003070.1	0.0164148	0.685914
AC003077.1	0.766176	0.125457
AC003102.1	0.000352577	2.21961
AC003681.1	0.000106704	0.827145
AC003688.1	2.19143e-11	1.4868
AC003965.2	3.34872e-24	2.35705
AC003991.2	0.21359	0.304659
AC004080.13	3.78178e-07	3.00923
AC004080.2	4.8473e-06	2.64543
AC004080.5	9.9317e-08	2.81313
AC004080.6	1.15367e-20	2.48661
AC004080.8	0.00057344	2.05009
AC004217.1	0.864199	0.0627028
AC004223.3	2.0128e-05	0.929595
AC004224.2	0.202134	0.337254
AC004263.2	0.144263	0.315917
AC004264.1	0.428681	0.208693
AC004386.4	0.897141	0.0895892
AC004408.1	0.000352577	2.21961
AC004466.1	0.000975317	1.12116
AC004471.1	0.000878105	1.76458
AC004477.1	0.000119756	1.04999
AC004490.1	0.00168941	0.708022
AC004528.2	0.0107916	0.690435
AC004540.1	0.00122165	1.66918
AC004542.1	1.35031e-11	1.9804
AC004542.2	2.13359e-16	2.10596
AC004542.3	9.4444e-10	2.05559
AC004542.4	1.75907e-17	2.40208
AC004542.5	3.05861e-11	2.41065
AC004542.6	3.63196e-08	1.51675
AC004596.1	0.182576	0.430426
AC004623.1	5.05951e-14	2.63937
AC004687.2	5.22864e-06	1.00172
AC004706.1	0.000127341	1.4252
AC004706.3	0.325395	0.383931
AC004771.1	0.779304	0.13125
AC004803.1	2.71061e-13	2.02343
AC004805.1	2.2495e-05	1.60652
AC004812.2	3.86548e-13	2.59104
AC004816.1	9.99862e-14	2.13178
AC004825.3	7.5748e-06	1.19527
AC004830.2	1.38794e-06	2.04879
AC004832.1	1.28006e-05	1.1194
AC004832.3	4.80967e-09	1.28566
AC004834.1	0.13189	0.7725
AC004854.2	3.98487e-05	1.07183
AC004877.1	3.95663e-08	1.78964
AC004882.3	1.07205e-13	1.87001
AC004890.2	0.00159813	0.899248
AC004893.2	0.0039998	0.670746
AC004900.1	0.00271174	0.765745
AC004908.1	0.471159	0.403303
AC004908.2	4.72326e-16	2.46879
AC004918.1	0.588462	0.155368
AC004918.3	0.00546398	1.59399
AC004938.2	0.0236259	1.00093
AC004943.2	2.84267e-06	1.11984
AC004951.1	0.195011	0.501815
AC004951.4	0.000317003	1.00048
AC004967.1	0.464632	0.21376
AC004967.2	0.863541	0.0739872
AC004974.1	2.39553e-16	1.80991
AC004980.1	1.19447e-06	1.14841
AC004997.1	0.0898059	0.482303
AC005005.3	0.13128	0.331014
AC005020.2	9.56558e-05	0.840381
AC005041.1	3.83717e-15	3.38667
AC005041.3	0.233548	0.453813
AC005041.4	1.44805e-06	2.90265
AC005041.5	0.00491084	0.706316
AC005052.2	1.29729e-09	8.07777
AC005082.2	2.96166e-07	1.83948
AC005180.1	2.06658e-14	1.93401
AC005180.2	2.669e-21	2.27285
AC005224.3	1.71606e-18	2.1832
AC005229.4	3.95087e-08	1.65556
AC005261.3	0.00996168	0.874963
AC005261.5	0.000415724	0.942003
AC005262.2	0.000202223	0.864997
AC005306.1	0.05432	0.506539
AC005324.3	1.36903e-08	1.49097
AC005324.4	3.16871e-29	2.45925
AC005324.5	5.97434e-09	2.80531
AC005329.1	0.122618	0.42754
AC005329.2	5.61516e-07	2.00021
AC005332.4	3.64417e-05	1.11851
AC005332.5	0.000258264	1.23632
AC005339.1	9.48365e-14	2.24404
AC005480.1	1.38002e-07	1.23238
AC005520.1	1.46882e-13	1.58196
AC005520.5	0.958302	0.0311212
AC005523.2	1.73124e-31	2.59873
AC005538.2	7.75551e-18	2.12259
AC005540.1	4.85668e-07	1.34368
AC005586.1	2.09761e-09	1.61225
AC005586.2	1.28004e-19	3.14735
AC005606.1	0.410208	0.313955
AC005606.2	0.00784761	0.636253
AC005614.1	0.188481	0.654208
AC005614.2	3.57837e-22	2.38378
AC005618.1	1.26346e-08	1.38847
AC005618.3	0.00017655	0.945272
AC005670.3	0.0156108	0.528936
AC005682.1	0.00188767	2.00649
AC005697.3	0.000857787	2.00139
AC005702.1	1.26469e-15	2.30476
AC005726.1	0.419165	0.174128
AC005726.2	2.18015e-05	0.911331
AC005730.2	1.03095e-05	3.59062
AC005775.1	0.0492331	0.814682
AC005785.1	0.399587	0.235967
AC005837.1	3.50064e-11	2.72149
AC005837.2	0.00069414	1.0527
AC005840.2	9.41039e-18	2.4727
AC005865.1	1.43295e-05	1.81513
AC005865.2	5.08771e-05	1.9901
AC005921.2	0.00391513	0.834914
AC005943.1	2.01721e-16	1.75503
AC005943.2	0.00131234	1.35364
AC006001.3	8.07382e-20	2.02603
AC006001.4	1.81253e-19	2.35896
AC006008.1	4.19586e-35	3.14585
AC006027.1	3.79475e-05	2.23769
AC006064.2	0.000901251	0.744139
AC006064.6	0.0286548	0.449685
AC006111.1	0.0014896	1.35997
AC006111.2	4.68244e-15	2.78936
AC006128.1	0.101464	0.428892
AC006153.1	2.96769e-07	1.23041
AC006207.1	0.0166986	1.19962
AC006213.1	5.22402e-09	1.57507
AC006213.2	3.22821e-13	2.27366
AC006213.3	8.2223e-05	2.52553
AC006213.6	7.67142e-05	1.89752
AC006252.1	3.58637e-17	3.33383
AC006357.1	0.0229474	1.09313
AC006369.1	4.77692e-05	1.72368
AC006435.1	0.0734462	0.658592
AC006435.2	0.716732	0.139277
AC006449.3	0.867839	0.0556207
AC006449.5	0.145184	0.60493
AC006449.6	4.41957e-08	1.5905
AC006449.7	0.0184199	0.764941
AC006460.1	0.0255003	0.491715
AC006460.2	0.00145512	1.23345
AC006504.5	1.69459e-22	2.34055
AC006511.3	0.0148663	1.02976
AC006538.1	2.47547e-10	3.7105
AC006538.2	1.36301e-14	1.8393
AC006547.1	0.194027	0.461897
AC006547.2	0.0501032	0.964335
AC006547.3	0.235823	0.370342
AC006557.3	0.00117769	2.20511
AC006946.2	0.698047	0.209673
AC006978.1	1.94878e-16	2.53856
AC006978.2	0.245219	0.433504
AC007032.1	5.64529e-05	2.20034
AC007068.1	0.124573	0.520241
AC007182.1	0.506904	0.346371
AC007191.1	0.00115065	1.1648
AC007240.3	0.001226	1.17029
AC007283.1	0.0233933	1.04267
AC007292.2	0.838754	0.0914303
AC007292.3	0.305676	0.50319
AC007314.1	0.800776	0.0538066
AC007375.2	2.09939e-05	1.11956
AC007383.1	8.74176e-05	1.2286
AC007390.1	1.4983e-06	1.08714
AC007405.1	0.000878105	1.76458
AC007405.2	0.0100683	1.44395
AC007541.1	2.91033e-12	2.78066
AC007566.1	0.734536	0.0995561
AC007608.1	0.00567901	0.936923
AC007611.1	1.03095e-05	3.59062
AC007613.1	0.0314496	0.797733
AC007622.2	2.59355e-06	1.20284
AC007686.3	1.61229e-22	2.34617
AC007695.1	0.0663279	0.963565
AC007728.2	0.00182998	1.31493
AC007731.4	2.66151e-13	2.10601
AC007842.1	7.74932e-10	2.35815
AC007906.2	8.64189e-10	2.25882
AC007996.1	0.220255	0.45893
AC008012.1	0.137301	0.309794
AC008079.1	1.1571e-10	1.81116
AC008119.1	0.129693	0.332274
AC008124.1	1.19744e-17	1.84064
AC008149.1	0.085825	0.382646
AC008277.1	0.00191784	1.44767
AC008393.1	0.0586261	1.01728
AC008403.1	0.0449342	0.484128
AC008403.2	0.424115	0.264107
AC008429.1	0.340904	0.372957
AC008438.1	3.03407e-11	2.84778
AC008443.1	7.50681e-08	1.28965
AC008443.4	6.69775e-05	1.32237
AC008443.5	1.0543e-15	2.77944
AC008494.3	0.0981134	0.598371
AC008522.1	5.47207e-35	2.79971
AC008537.1	5.89196e-09	1.77459
AC008543.1	9.08396e-13	1.86836
AC008575.1	1.45455e-13	1.58906
AC008608.2	2.13582e-10	2.32403
AC008622.2	1.41548e-05	1.02228
AC008686.1	0.274434	0.440317
AC008695.1	1.083e-06	1.03906
AC008734.1	2.58942e-09	2.06446
AC008736.1	3.14981e-21	3.78998
AC008738.3	6.31227e-20	3.24484
AC008738.5	1.68086e-26	3.0212
AC008738.7	5.28704e-05	1.19997
AC008741.1	0.453801	0.366493
AC008750.3	0.0127853	0.527984
AC008750.7	0.0296328	0.45797
AC008758.1	1.53317e-26	2.54131
AC008758.3	4.09254e-08	3.17104
AC008758.4	4.37522e-19	3.81496
AC008758.5	6.38813e-35	3.89956
AC008758.6	5.23435e-16	2.11415
AC008761.1	0.000320834	1.27155
AC008763.3	0.697195	0.08265
AC008764.1	1.06619e-17	1.89902
AC008764.3	4.36025e-16	2.05313
AC008764.4	1.1494e-10	1.60856
AC008764.8	0.013628	0.99478
AC008770.1	2.95066e-10	2.05823
AC008770.2	5.57642e-19	2.3083
AC008770.4	2.45101e-06	1.06299
AC008870.1	1.443e-05	1.02751
AC008870.3	0.97671	0.0136967
AC008870.4	4.16621e-13	1.99765
AC008875.3	1.43515e-22	2.46716
AC008878.1	0.0101265	0.734506
AC008878.2	0.271288	0.239588
AC008878.3	1.88297e-05	0.936622
AC008878.4	0.00764158	1.01267
AC008894.2	4.69646e-05	0.864562
AC008914.1	3.50336e-05	0.978493
AC008915.3	0.824909	0.118883
AC008937.2	0.460804	0.283012
AC008937.3	3.37137e-07	1.32356
AC008966.1	2.13364e-11	1.70078
AC008982.1	0.400247	0.177407
AC009041.3	1.5793e-05	2.88589
AC009053.1	0.0354972	0.626069
AC009053.2	0.0262662	0.907539
AC009060.1	1.76316e-11	1.52177
AC009065.3	0.0419356	0.717467
AC009065.6	0.0387935	1.06267
AC009065.7	2.45954e-08	2.14873
AC009070.1	0.0706376	0.394319
AC009084.1	3.71948e-07	1.19174
AC009084.3	1.0319e-05	1.12585
AC009087.1	0.841112	0.0712105
AC009088.2	0.294122	0.243545
AC009097.1	0.00239031	1.03048
AC009097.2	3.47376e-14	2.30152
AC009097.4	0.317392	0.383807
AC009113.1	4.48041e-15	1.94243
AC009113.2	1.03758e-15	2.49933
AC009118.2	5.84457e-06	1.05951
AC009120.2	0.903237	0.0254198
AC009126.1	4.46311e-14	2.54033
AC009133.1	0.0440361	0.431045
AC009133.2	7.26934e-05	0.867682
AC009133.4	0.588605	0.15161
AC009133.6	3.19591e-07	1.08516
AC009137.1	1.90209e-10	1.67814
AC009163.3	0.000438362	1.27028
AC009163.7	5.6308e-11	4.53068
AC009185.1	0.899603	0.0848148
AC009238.3	0.00408027	1.43064
AC009275.1	2.24708e-08	2.02098
AC009303.2	0.0231161	0.60418
AC009303.4	0.000153408	1.83357
AC009309.2	4.25715e-05	1.85366
AC009318.1	0.0179131	0.67319
AC009412.1	6.99323e-41	3.30136
AC009474.1	0.000674911	1.46595
AC009501.2	7.49495e-17	2.45011
AC009506.1	0.150803	0.460444
AC009509.2	4.67721e-14	3.06464
AC009511.1	0.0508682	1.01397
AC009511.2	1.82449e-19	2.19656
AC009533.1	0.69309	0.113644
AC009549.1	3.19494e-14	2.32893
AC009630.2	0.962159	0.0236732
AC009630.3	1.09841e-21	2.11443
AC009779.2	1.83591e-07	1.42786
AC009831.1	0.540518	0.25536
AC009879.2	5.86039e-08	1.21162
AC009948.1	4.98127e-06	1.9615
AC009948.2	3.55231e-06	2.82695
AC009948.3	2.54877e-05	2.2741
AC010132.3	0.0308451	0.455156
AC010168.2	0.956941	0.0338453
AC010173.1	7.7493e-08	2.2278
AC010186.2	0.0314496	0.797733
AC010186.4	0.527753	0.31609
AC010226.1	0.00142627	0.732327
AC010255.1	3.35152e-20	2.33141
AC010255.2	4.71333e-14	2.31552
AC010255.3	7.13489e-16	2.05832
AC010326.2	8.68908e-16	2.38938
AC010327.7	0.00108855	1.3111
AC010328.3	1.85698e-19	2.16914
AC010336.1	3.33688e-13	1.63644
AC010336.4	0.056514	0.650012
AC010336.7	0.62586	0.241634
AC010401.1	2.32893e-05	1.12928
AC010422.6	4.27495e-38	2.91517
AC010422.7	0.0573879	0.595657
AC010442.3	0.223404	0.294977
AC010487.1	4.8455e-05	1.69264
AC010494.1	6.58386e-06	2.10136
AC010501.2	0.000612799	1.80508
AC010522.1	3.37046e-09	1.38212
AC010531.1	4.02953e-16	2.15866
AC010536.1	4.98665e-12	2.25998
AC010538.1	0.141625	0.688845
AC010542.2	1.43295e-05	1.81513
AC010542.3	6.23805e-08	1.3258
AC010542.4	0.195824	0.495484
AC010542.5	1.34731e-15	1.93952
AC010547.4	1.67749e-32	2.61005
AC010615.1	0.0501032	0.964335
AC010615.4	2.00423e-12	2.20659
AC010624.1	8.39027e-05	2.162
AC010624.3	0.000592098	0.96066
AC010632.1	4.66518e-10	2.26025
AC010636.2	0.000855913	1.26721
AC010642.2	6.19634e-11	1.40856
AC010646.1	4.77177e-12	1.79594
AC010653.2	1.8318e-23	2.39408
AC010654.1	0.0595211	0.760875
AC010655.2	7.11359e-19	2.22389
AC010655.4	0.000117704	0.843406
AC010680.3	2.5283e-05	2.83878
AC010733.1	4.46807e-12	1.70983
AC010761.2	0.00401524	1.70925
AC010761.4	1.429e-15	2.53671
AC010761.5	2.72451e-14	2.43624
AC010789.2	0.493001	0.312381
AC010834.1	2.96132e-12	1.91412
AC010883.3	0.35896	0.248045
AC010970.1	0.963117	0.0197932
AC010976.1	7.96794e-07	1.16948
AC010978.1	5.91952e-10	1.45077
AC010996.1	0.573202	0.252931
AC010997.3	5.10276e-09	1.97706
AC011346.1	0.000162185	1.40637
AC011375.1	0.0575192	0.963976
AC011446.1	0.112806	0.47167
AC011446.2	3.18496e-16	1.79533
AC011446.3	4.24105e-12	2.12926
AC011447.3	0.166975	0.351606
AC011450.1	2.72334e-07	1.86427
AC011452.2	8.6198e-17	1.93404
AC011455.2	0.14469	0.408451
AC011462.1	0.00385714	0.668501
AC011466.1	0.085967	0.911338
AC011466.3	0.0742151	0.502944
AC011468.2	3.94998e-10	1.51948
AC011472.2	0.00903825	1.6686
AC011472.3	0.352205	0.260176
AC011472.5	0.717749	0.183037
AC011476.2	5.01963e-13	2.03278
AC011476.3	1.83731e-11	1.86413
AC011477.1	0.179719	0.742252
AC011477.2	0.0187538	1.21572
AC011477.8	4.07669e-09	2.8273
AC011479.4	0.122006	0.513882
AC011498.3	6.79439e-11	1.5822
AC011498.7	4.27624e-11	2.83151
AC011499.1	0.633873	0.145913
AC011500.3	6.04251e-05	1.46541
AC011511.1	0.000794884	0.751446
AC011511.2	0.468268	0.156287
AC011511.4	3.05383e-05	1.03528
AC011511.5	1.15452e-05	1.50826
AC011530.1	2.64955e-23	2.56061
AC011603.3	0.869613	0.0336986
AC011603.4	0.0387935	1.06267
AC011611.3	1.0202e-19	1.93259
AC011611.4	0.00363004	0.917689
AC011676.1	2.00478e-07	2.26088
AC011676.2	9.70011e-06	1.70761
AC011731.1	9.86585e-06	2.93151
AC011815.1	8.19753e-32	3.47786
AC011939.3	0.0464848	0.864232
AC012063.1	1.33265e-05	2.046
AC012073.1	6.35226e-05	0.985834
AC012085.1	0.00254585	1.63578
AC012157.2	0.0438256	0.964653
AC012173.1	5.78039e-20	2.38127
AC012184.1	6.07009e-16	2.22553
AC012184.2	0.000234121	0.77476
AC012184.3	0.0466659	0.46992
AC012184.4	1.9005e-05	0.944393
AC012213.5	0.159218	0.294384
AC012306.2	0.00440277	1.46282
AC012309.1	1.91629e-06	1.22693
AC012309.2	6.28819e-14	3.59864
AC012313.1	3.49142e-22	2.428
AC012313.2	0.000103608	2.68745
AC012313.3	1.88715e-08	2.73728
AC012313.4	0.0101184	1.21137
AC012313.8	2.58744e-08	1.81038
AC012354.3	1.8943e-05	2.0175
AC012358.3	0.0701227	0.439767
AC012360.3	4.7479e-13	1.98251
AC012435.2	0.000430003	1.78427
AC012443.2	0.0014954	0.725687
AC012447.1	0.000819566	2.11698
AC012485.1	0.714817	0.101912
AC012488.2	5.52725e-18	1.89277
AC012531.2	0.091962	0.488567
AC012531.3	0.00451165	0.68534
AC012615.1	0.0243483	0.714881
AC012615.3	0.0139607	0.699376
AC012615.5	0.228883	0.487432
AC012615.6	2.84567e-08	1.92743
AC012618.3	2.16716e-06	1.85671
AC012629.2	0.915187	0.0570088
AC012640.2	0.0154208	0.966653
AC012640.4	0.0343346	0.459888
AC012676.1	9.82287e-10	2.31315
AC013356.2	1.76804e-05	1.30493
AC013394.1	0.820441	0.0497445
AC013451.2	0.00457401	0.938909
AC013477.2	0.0785404	0.374691
AC013489.1	1.1421e-11	1.52908
AC013489.3	0.584455	0.181808
AC013717.1	1.54677e-40	2.96643
AC015563.2	5.95374e-25	3.46298
AC015688.4	0.240748	0.643559
AC015712.2	3.64322e-13	2.14638
AC015795.1	0.814072	0.132947
AC015802.4	0.067924	0.722454
AC015813.5	0.459106	0.157225
AC015813.7	1.67879e-05	1.91214
AC015849.5	0.339516	0.497389
AC015853.1	0.254598	0.551891
AC015871.8	1.36616e-07	1.88249
AC015912.1	0.0780199	0.577219
AC015917.2	0.0210435	0.999468
AC015921.1	0.405	0.324022
AC015971.1	0.807701	0.0563907
AC015982.2	1.3663e-05	1.85201
AC016026.1	1.84782e-15	1.81405
AC016027.1	3.06573e-09	1.79469
AC016065.1	1.81838e-18	2.21052
AC016394.1	2.13645e-10	1.78733
AC016394.2	0.173243	0.644622
AC016405.2	1.03095e-05	3.59062
AC016549.1	0.130051	0.593648
AC016588.1	0.0804439	0.634645
AC016590.1	3.71385e-14	2.59609
AC016597.1	0.0790364	1.02566
AC016629.1	0.00068116	1.23335
AC016629.2	0.0347902	0.792522
AC016629.3	4.46161e-08	1.32893
AC016644.1	0.000138614	1.34835
AC016705.2	0.561899	0.236742
AC016746.1	0.000486586	1.47073
AC016831.1	5.84992e-11	1.3822
AC016831.6	2.45858e-12	1.48444
AC016876.4	0.0018476	1.74021
AC016888.1	0.287645	0.249786
AC016999.1	0.19147	0.392761
AC017007.2	3.85975e-11	2.1191
AC017100.1	1.3663e-05	1.85201
AC018413.1	6.21505e-05	1.49602
AC018445.5	0.00128926	1.86058
AC018462.1	0.647602	0.175688
AC018511.2	0.336341	0.301921
AC018521.4	0.288744	0.296625
AC018630.2	4.02391e-07	1.22246
AC018647.2	5.82705e-10	1.48527
AC018653.3	0.206011	0.666083
AC018665.1	0.793209	0.0978141
AC018693.1	0.019887	0.761014
AC018695.9	2.06086e-09	1.3591
AC018714.2	4.23223e-09	2.24073
AC018761.2	0.457006	0.176472
AC018809.3	0.173234	0.316922
AC019069.1	6.20824e-19	2.49088
AC019080.1	0.195552	0.363662
AC019129.2	0.00778622	1.54177
AC019130.1	0.226333	0.68118
AC019322.1	0.023845	1.25582
AC020611.2	0.282154	0.357457
AC020659.2	0.000365963	0.891
AC020663.1	0.0335099	1.11991
AC020763.4	1.90607e-09	1.29694
AC020904.3	6.39033e-07	2.14116
AC020909.1	2.02124e-05	1.37456
AC020909.3	0.205448	0.344505
AC020910.5	3.85312e-06	3.01864
AC020910.6	2.00965e-14	2.64535
AC020913.1	9.29797e-09	1.34142
AC020913.2	1.10192e-06	1.15643
AC020915.2	0.11093	0.468764
AC020915.4	1.20783e-17	1.82337
AC020916.1	0.0013364	0.776753
AC020928.1	3.55983e-22	2.31962
AC020928.2	1.97077e-23	2.52866
AC020931.1	0.00318871	0.891131
AC020934.2	0.642453	0.180713
AC020978.2	1.09928e-11	2.67463
AC020978.4	0.000196752	1.99451
AC020978.5	0.00288069	0.663855
AC020978.7	0.000159277	0.871171
AC021037.1	0.045909	0.809581
AC021087.5	0.0947776	0.346008
AC021092.1	1.55553e-19	2.00276
AC021127.1	0.0577496	0.828718
AC021205.3	9.43926e-07	3.1402
AC021218.1	0.0789874	0.726042
AC021242.3	0.000101808	1.33601
AC021269.3	0.1317	0.67722
AC021549.2	0.00429585	1.88682
AC021683.3	1.57282e-05	1.93439
AC021739.2	0.000418716	1.64561
AC021739.3	0.000450886	1.01648
AC022007.1	6.22573e-25	2.78667
AC022098.1	3.92086e-06	1.27996
AC022107.1	1.54278e-14	1.93102
AC022137.3	0.00437543	0.756986
AC022144.1	0.157493	0.553147
AC022150.1	0.0370978	1.22263
AC022150.3	1.92608e-14	1.95525
AC022150.4	0.00304202	0.692926
AC022154.1	0.00035865	1.03607
AC022165.1	0.00240092	1.05924
AC022167.2	7.94301e-24	2.29814
AC022210.1	2.6754e-07	1.60148
AC022211.2	9.15491e-16	1.88672
AC022382.1	0.164415	0.588952
AC022384.1	3.68444e-16	1.77089
AC022395.1	0.000406563	1.20965
AC022400.1	2.90749e-16	3.00064
AC022400.5	2.26008e-12	1.59318
AC022400.7	0.000660686	0.726301
AC022413.1	0.000607742	1.26885
AC022414.1	0.766176	0.125457
AC022415.2	9.71729e-15	1.8959
AC022506.1	0.0398844	0.534722
AC022506.2	1.65251e-06	1.36818
AC022613.2	0.188481	0.654208
AC022784.1	1.07435e-09	1.95709
AC022784.5	1.29273e-36	3.12581
AC022916.1	2.09998e-07	2.65157
AC023024.1	2.61497e-07	1.76025
AC023024.2	4.93146e-05	1.5697
AC023043.4	1.33265e-05	2.046
AC023055.1	0.0364462	0.431114
AC023157.2	1.17979e-12	2.04609
AC023389.1	0.00285251	1.9479
AC023593.1	2.94375e-08	1.29844
AC023632.2	0.00174499	1.12738
AC024267.4	0.165414	0.720273
AC024267.6	2.24873e-15	2.16174
AC024560.5	0.000128733	0.877294
AC024575.1	0.376211	0.433223
AC024588.1	6.25776e-09	1.47074
AC024909.1	1.38735e-15	1.73803
AC025164.1	0.274434	0.440317
AC025165.3	1.64102e-15	1.70236
AC025171.1	2.55593e-09	1.51189
AC025171.2	9.48657e-06	1.42105
AC025171.3	8.06982e-06	2.01084
AC025257.1	2.66667e-16	1.81422
AC025259.1	1.68153e-12	1.60337
AC025283.2	3.29742e-28	2.53047
AC025287.1	5.34215e-08	1.28606
AC025287.2	1.07845e-06	2.15256
AC025419.1	0.000186539	0.790289
AC025423.2	7.87483e-34	2.71973
AC025423.4	1.24199e-20	1.99509
AC025678.3	1.07845e-06	2.15256
AC025682.1	0.000474813	0.78423
AC025754.1	0.361335	0.250249
AC025887.2	1.84384e-08	3.0593
AC025917.1	0.029006	0.880899
AC026191.1	0.00180761	0.926734
AC026202.3	0.899603	0.0848148
AC026271.3	1.86104e-10	2.02817
AC026271.5	2.43286e-09	2.18163
AC026304.1	0.250975	0.353205
AC026318.1	0.39831	0.398525
AC026401.3	0.00163114	0.696787
AC026412.1	0.00116034	1.01793
AC026412.3	4.65818e-06	1.56533
AC026464.1	4.26584e-08	1.77396
AC026464.3	1.42432e-08	1.64161
AC026464.6	2.83917e-46	3.36448
AC026471.1	1.26233e-21	2.28301
AC026471.6	0.000548995	1.20642
AC026691.1	1.2755e-06	1.57463
AC026704.1	3.63265e-05	1.45807
AC026748.3	3.76936e-20	3.18461
AC026786.1	1.74191e-22	2.2408
AC026786.2	5.50781e-24	3.33812
AC026803.2	0.268101	0.579272
AC026954.3	6.22483e-23	2.30179
AC026979.2	0.0101985	0.728695
AC027031.2	8.19843e-21	2.22607
AC027097.1	2.00625e-05	1.75963
AC027097.2	6.36389e-05	1.73296
AC027290.1	4.96772e-14	2.05769
AC027290.2	4.05626e-12	1.52951
AC027307.2	8.01477e-05	1.25457
AC027601.2	0.0224387	0.85723
AC027601.3	0.170239	0.384433
AC027644.3	3.05565e-11	1.86752
AC027644.4	0.0125777	0.527552
AC027796.3	1.58261e-24	2.38716
AC034102.6	1.64705e-06	1.03762
AC034193.1	0.698354	0.0941374
AC036214.1	0.0014896	1.35997
AC037459.1	3.60693e-19	2.06578
AC037459.2	0.000886095	0.69469
AC039056.2	2.70647e-07	3.93309
AC040162.1	0.454269	0.185747
AC040162.3	0.0154892	0.545661
AC040169.1	0.0439575	1.14533
AC040970.1	1.39152e-20	2.67809
AC044802.1	6.87003e-08	2.12401
AC044802.2	0.000770035	1.40506
AC044849.1	0.00055092	0.822455
AC044860.1	4.03453e-06	2.19814
AC046134.2	3.52247e-07	1.67586
AC046143.1	0.0385971	0.631848
AC046185.1	0.749953	0.0681282
AC046185.3	1.46845e-09	3.21648
AC048338.1	0.581907	0.115037
AC048338.2	0.737723	0.0707254
AC048341.1	0.145128	0.581
AC048344.1	1.40631e-19	2.23009
AC048344.4	0.223233	0.406152
AC048351.1	4.02063e-15	3.86516
AC048382.5	1.90873e-12	2.02148
AC048382.6	3.87196e-07	2.32714
AC055811.2	9.24923e-08	1.21855
AC055855.1	0.018998	0.938469
AC055860.1	0.904834	0.0375529
AC058822.1	0.92141	0.0244268
AC060780.1	5.89069e-08	1.283
AC063948.1	0.133707	0.471571
AC064807.1	4.93355e-05	1.12562
AC064836.2	0.00162847	0.927945
AC064852.1	0.375087	0.247642
AC066613.2	0.620038	0.203537
AC067751.1	6.01851e-08	1.88866
AC067852.1	1.43674e-08	1.55327
AC067852.2	2.30029e-30	2.61353
AC067930.4	0.0173763	0.645648
AC067930.5	0.762049	0.0619638
AC067930.8	0.00102506	0.810062
AC067931.1	2.05846e-05	1.04635
AC067968.1	3.79689e-16	1.78153
AC068338.2	1.08763e-25	2.5375
AC068338.3	1.44839e-05	1.45768
AC068473.5	7.17175e-08	1.39504
AC068587.4	0.783707	0.100863
AC068587.5	0.471159	0.403303
AC068620.1	6.16451e-06	2.97573
AC068620.2	0.592245	0.134933
AC068733.3	0.00665174	0.776273
AC068790.8	0.500714	0.164338
AC068831.5	0.00429585	1.88682
AC068831.6	0.155278	0.296024
AC068870.2	0.00557603	1.39014
AC068870.4	7.45832e-06	2.60808
AC068896.1	1.15373e-08	1.30574
AC068946.2	0.128394	0.339207
AC069224.1	1.32894e-10	2.47823
AC069257.3	0.665343	0.114081
AC069281.2	0.313128	0.270869
AC069287.2	2.1856e-17	2.33141
AC069288.1	4.40292e-17	1.78774
AC069368.1	2.08252e-18	2.13564
AC069499.1	1.87795e-17	3.09489
AC069503.1	1.02991e-08	2.30022
AC069503.2	0.178446	0.285418
AC069542.1	0.31724	0.277636
AC069544.1	0.017119	0.941724
AC072028.1	0.0242209	0.575634
AC072039.2	0.00266326	1.2605
AC073046.1	2.44218e-10	2.23915
AC073063.1	0.00418133	1.78826
AC073107.1	0.00241842	1.38915
AC073111.3	1.50467e-19	2.61183
AC073111.4	6.11533e-13	2.077
AC073167.1	0.563815	0.160747
AC073254.1	0.309516	0.383982
AC073320.1	0.026994	1.28123
AC073343.1	0.0103064	1.30557
AC073343.2	0.00381958	1.6444
AC073389.1	0.000185617	1.28104
AC073389.2	1.23717e-07	2.24334
AC073508.3	1.29462e-16	2.37561
AC073529.1	0.19969	0.625425
AC073548.1	0.02804	0.647028
AC073569.2	0.203326	0.305969
AC073612.1	0.151322	0.566744
AC073648.6	0.595153	0.205009
AC073648.7	2.05813e-08	1.84803
AC073863.1	0.00749102	0.792713
AC073957.2	4.36066e-16	2.63043
AC074032.1	0.000322925	0.918195
AC074050.3	0.0785181	0.839863
AC074117.1	0.0179517	0.569886
AC074141.1	4.49864e-09	1.79541
AC074143.1	0.000445836	1.18503
AC074183.1	0.0622085	0.88277
AC074183.2	0.0622085	0.88277
AC074194.1	0.226333	0.68118
AC074212.1	1.29544e-07	1.57774
AC074386.1	6.92612e-12	1.96755
AC078777.1	2.53307e-19	2.50829
AC078785.1	0.744627	0.149748
AC078795.1	4.90424e-06	1.138
AC078802.1	2.19364e-05	1.90797
AC078815.1	4.84735e-06	1.10466
AC078820.1	9.48657e-06	1.42105
AC078820.2	1.19679e-06	1.72221
AC078846.1	0.396941	0.206049
AC078883.1	0.582558	0.197705
AC078923.1	1.6108e-05	1.35715
AC078993.1	3.67393e-05	1.68609
AC079142.1	1.59477e-05	1.72128
AC079174.2	0.000159262	1.69852
AC079305.1	0.00132175	0.916296
AC079385.1	1.86447e-09	2.12203
AC079416.4	0.000135192	1.02385
AC079601.1	0.000602715	1.69648
AC079781.5	0.0597131	0.395701
AC079880.1	1.75943e-27	2.60352
AC079944.2	0.0140563	1.39172
AC080023.1	0.0822399	0.871604
AC080112.1	2.71979e-22	2.10322
AC080112.3	1.23973e-05	1.71416
AC083798.2	0.0798945	0.403582
AC083799.1	6.21635e-31	2.8178
AC083829.1	0.00208242	0.817088
AC083837.1	1.78324e-11	2.09775
AC083855.2	4.56496e-17	2.10505
AC083862.1	1.48185e-23	2.31792
AC083880.1	1.01271e-07	1.76762
AC084123.1	3.37893e-08	1.55982
AC084125.1	1.68899e-05	1.39432
AC084125.2	3.13168e-08	1.22048
AC084125.4	0.60557	0.218648
AC084337.2	0.000239315	0.934173
AC084876.1	1.07551e-06	1.85
AC087163.3	0.0128291	0.8896
AC087164.1	0.0663176	0.424874
AC087241.2	0.00440277	1.46282
AC087286.3	4.92236e-10	1.46527
AC087289.2	0.758277	0.154961
AC087289.3	0.155702	0.30257
AC087289.5	0.000466832	1.1104
AC087292.1	1.14636e-14	2.37688
AC087294.1	0.000206996	2.85797
AC087362.1	4.07319e-17	2.04102
AC087362.2	0.00105669	0.861226
AC087393.2	0.223486	0.338685
AC087588.3	0.000178834	1.27367
AC087623.2	0.574349	0.219061
AC087632.2	2.8604e-05	0.894679
AC087752.4	0.295259	0.343045
AC089999.1	0.0314496	0.797733
AC090004.1	0.0268314	0.573694
AC090023.1	0.000771243	0.733179
AC090023.2	0.103818	0.430674
AC090114.2	2.41319e-23	2.40442
AC090181.2	0.000137743	1.13817
AC090227.2	0.593051	0.130176
AC090360.1	0.857084	0.0397601
AC090409.1	2.22573e-17	1.90754
AC090409.2	0.437752	0.342761
AC090498.1	0.00401481	0.792757
AC090510.1	0.294111	0.309624
AC090510.3	5.14222e-08	2.07877
AC090517.5	0.122847	0.66745
AC090559.1	1.33265e-05	2.046
AC090587.1	0.00182283	2.14404
AC090587.2	0.000124562	2.1226
AC090617.10	3.05743e-13	1.97727
AC090617.3	3.43878e-38	2.92746
AC090617.5	6.90143e-26	3.13574
AC091045.1	6.01489e-09	1.30164
AC091057.3	3.0572e-05	1.88107
AC091153.4	2.81648e-21	2.54621
AC091167.1	0.0187538	1.21572
AC091167.2	1.78314e-09	1.26865
AC091167.6	2.16236e-07	1.16239
AC091167.7	0.000142372	1.14068
AC091180.3	0.000126809	0.85139
AC091180.4	0.00128926	1.86058
AC091271.1	0.899603	0.0848148
AC091390.4	0.00395418	0.677551
AC091551.1	4.83853e-11	1.52261
AC091564.2	0.615663	0.12581
AC091564.3	0.298652	0.223989
AC091588.3	2.82137e-09	1.87814
AC091729.3	1.05763e-14	2.49656
AC091887.1	0.222894	0.467495
AC091978.1	1.31272e-06	2.18938
AC092032.2	2.59511e-16	2.01264
AC092032.3	4.35911e-32	3.01044
AC092053.2	5.69274e-05	1.87408
AC092073.1	0.419172	0.172663
AC092115.3	9.25867e-12	1.48614
AC092117.1	5.80491e-08	1.99395
AC092118.2	0.0207266	0.683497
AC092134.1	0.788187	0.161507
AC092143.1	1.3351e-06	1.00653
AC092143.2	9.14061e-09	2.17076
AC092143.3	0.00785925	0.671138
AC092171.2	8.42962e-05	1.36093
AC092275.1	7.44748e-07	7.51642
AC092279.1	2.79343e-05	1.22952
AC092295.2	1.61125e-07	1.89367
AC092301.1	0.327546	0.42265
AC092329.1	0.00133912	1.45455
AC092329.3	4.88166e-20	2.08451
AC092329.4	3.62265e-06	1.48659
AC092338.3	4.15891e-10	1.52975
AC092384.2	0.0294287	0.904901
AC092418.2	0.226333	0.68118
AC092647.5	4.65704e-07	1.073
AC092651.1	0.466399	0.204601
AC092720.3	0.000216503	1.8005
AC092745.5	0.0678932	1.02113
AC092803.1	0.00582377	1.65506
AC092807.4	0.398071	0.232619
AC092821.3	0.935043	0.0850265
AC092835.1	6.89757e-20	2.15519
AC092849.1	0.755333	0.158425
AC092902.4	0.0286899	0.567272
AC092902.5	0.546572	0.171774
AC092910.3	0.00214466	1.10831
AC092919.2	8.98917e-18	2.53616
AC092943.1	0.00190528	1.89876
AC093012.1	0.000588174	0.883404
AC093227.2	1.80203e-07	1.36361
AC093249.6	0.590815	0.290066
AC093323.1	1.85776e-23	2.19908
AC093423.3	3.07897e-23	2.29644
AC093484.3	0.9481	0.0135258
AC093495.1	0.00135538	0.75253
AC093503.1	0.826495	0.0654002
AC093512.2	0.120827	0.318952
AC093525.2	0.623978	0.104702
AC093525.7	0.783707	0.100863
AC093627.5	4.81909e-06	1.69086
AC093673.1	5.04076e-14	1.7047
AC093726.1	0.00277865	1.31748
AC093827.5	0.517593	0.330593
AC093838.2	0.345894	0.395708
AC096536.2	0.726647	0.0724975
AC096677.2	6.28398e-07	1.58379
AC096861.2	0.483743	0.382493
AC096887.1	0.21243	0.302742
AC096887.2	0.0443348	1.01109
AC096992.2	0.221422	0.574655
AC097359.2	6.92687e-12	1.79481
AC097376.3	0.00496159	0.761092
AC097382.2	5.40969e-08	1.1558
AC097382.3	0.000902423	1.14553
AC097493.3	0.819421	0.116111
AC097532.2	0.0299068	1.05146
AC097634.4	1.49715e-10	1.3683
AC097637.1	0.019952	0.510686
AC097639.1	4.45826e-08	2.05877
AC097641.2	5.34412e-05	1.38175
AC098484.1	0.419497	0.419904
AC098484.3	1.40935e-08	1.66075
AC098582.1	0.277554	0.245182
AC098591.2	0.101126	0.605833
AC098614.2	6.59716e-08	1.58397
AC098934.1	4.17025e-05	2.44817
AC099343.3	1.53376e-06	1.70743
AC099508.1	1.06029e-05	2.18856
AC099518.3	8.36387e-26	2.58034
AC099518.5	0.254704	0.349148
AC099522.2	0.0259426	1.10093
AC099568.2	0.0211675	0.93721
AC099569.1	2.06049e-13	2.64714
AC099778.1	6.35885e-12	2.32724
AC100791.2	0.0348294	0.832042
AC100810.1	2.02541e-09	1.65687
AC100810.3	0.000104519	1.31006
AC100861.1	8.66886e-10	1.38551
AC100861.2	4.92515e-05	1.63778
AC102945.2	0.000202378	1.54886
AC103702.2	9.5409e-29	2.72363
AC103739.2	0.000384483	1.02305
AC103740.1	0.00275824	1.76148
AC104046.1	0.000878105	1.76458
AC104078.1	8.46346e-13	4.03699
AC104109.2	3.0572e-05	1.88107
AC104109.3	0.219003	0.262762
AC104109.4	4.34959e-05	0.885477
AC104116.1	5.56554e-05	1.17891
AC104134.1	1.37977e-05	1.04348
AC104135.1	0.00118125	1.62272
AC104389.5	0.00189716	0.780448
AC104447.1	0.00903825	1.6686
AC104452.1	0.257543	0.46763
AC104461.1	6.10845e-05	1.78238
AC104472.3	4.88052e-08	1.2246
AC104506.1	0.317984	0.437453
AC104561.1	2.1164e-05	1.70086
AC104561.2	9.9317e-08	2.81313
AC104561.3	0.000264517	2.57695
AC104561.4	5.22162e-13	3.03002
AC104596.1	0.142719	0.509366
AC104779.1	0.252277	0.511863
AC104825.1	0.19969	0.625425
AC105020.2	5.07389e-32	3.3395
AC105020.6	2.56354e-26	2.84392
AC105036.3	0.0002421	0.861671
AC105046.2	0.00188854	1.81188
AC105052.2	3.15154e-16	2.8609
AC105219.3	2.53383e-08	2.0891
AC105285.1	3.23369e-08	1.53435
AC105345.2	0.000658114	1.35755
AC105942.1	1.08168e-13	1.89527
AC106712.1	9.41387e-27	2.36752
AC106736.1	4.29038e-18	2.43549
AC106739.1	0.030067	1.00433
AC106760.1	1.0366e-15	2.70647
AC106782.5	4.74818e-05	1.48287
AC106795.1	0.143508	0.44674
AC106820.5	4.85731e-07	1.29816
AC106820.6	0.281076	0.460995
AC106886.2	0.000732761	0.786486
AC106886.5	4.34857e-05	1.0128
AC106886.6	2.01535e-05	0.88378
AC107375.1	0.0806983	0.483881
AC107398.2	0.370141	0.396955
AC107871.1	0.00230689	0.663639
AC107871.2	7.10033e-14	2.4674
AC107884.1	0.313433	0.399458
AC107959.1	1.91185e-12	1.74148
AC108002.1	1.9844e-06	1.78892
AC108134.2	0.40873	0.383067
AC108448.3	0.000187747	1.48561
AC108449.3	0.106845	0.762379
AC108451.1	0.330449	0.3674
AC108451.2	0.00151521	1.15122
AC108463.1	0.663629	0.188006
AC108463.2	0.230947	0.51519
AC108479.1	0.0853031	0.460797
AC108488.3	1.03627e-10	2.93618
AC108519.1	0.0810025	0.633033
AC108724.2	0.00187015	1.13188
AC109322.1	1.88313e-11	1.5683
AC109449.1	0.0120982	1.54016
AC109460.2	0.267284	0.270642
AC109587.1	0.000237074	0.794226
AC110491.2	0.00664391	0.65139
AC110611.1	0.372578	0.299433
AC110749.1	0.0591425	1.08673
AC112220.2	4.2642e-14	1.66241
AC112484.1	0.000294925	1.60615
AC112497.2	0.0582347	0.721118
AC112504.2	0.217023	0.311774
AC112777.1	0.000219108	1.24741
AC112907.2	1.81096e-12	2.39935
AC113189.1	1.04e-06	2.53638
AC113189.9	0.00011673	1.69001
AC113348.2	0.0193835	0.624591
AC114271.1	0.499556	0.153031
AC114730.3	1.30772e-06	1.48629
AC114956.2	0.199734	0.473075
AC116158.3	0.19969	0.625425
AC116317.1	0.17783	0.591753
AC116353.5	0.38765	0.340627
AC116366.2	0.02756	0.473768
AC116407.1	0.933263	0.0588775
AC116407.3	0.19969	0.625425
AC116562.3	1.25754e-10	2.37795
AC116913.1	0.000605543	0.802937
AC117382.1	0.0322731	0.810782
AC117490.2	5.40559e-15	1.79008
AC118754.2	3.6972e-09	3.54425
AC119403.1	9.83835e-28	2.63009
AC119751.6	6.93678e-09	4.9765
AC120057.3	0.841032	0.0565137
AC120114.1	3.22249e-07	1.94728
AC120114.4	7.90547e-06	0.979891
AC121338.2	8.9901e-11	2.73344
AC122108.1	0.0290234	0.710498
AC123768.1	9.21502e-08	2.17793
AC123768.2	9.47261e-11	2.39076
AC123768.4	1.93083e-11	1.45531
AC124242.1	0.393728	0.464376
AC124276.1	0.000945626	1.46059
AC124283.1	3.49792e-21	2.44277
AC124283.2	2.86969e-06	2.3689
AC124319.2	0.0155637	1.28296
AC124319.3	0.156318	0.608853
AC124798.1	9.83056e-10	1.37847
AC125257.1	0.00722315	0.626775
AC125388.1	7.02447e-09	3.28857
AC125437.1	0.064366	0.918715
AC125494.1	1.33128e-07	1.30007
AC125611.2	7.08049e-08	1.45741
AC125616.1	1.02955e-36	3.2535
AC125807.2	0.0361339	0.586464
AC126283.2	0.0269604	0.47647
AC126696.2	0.00646473	0.865281
AC126755.1	7.45832e-06	2.60808
AC126755.6	2.95077e-05	3.47572
AC127459.1	0.450584	0.297611
AC127496.3	4.61071e-06	1.39585
AC127496.4	7.83459e-06	1.45028
AC127496.6	1.53965e-10	1.99982
AC127502.2	2.79526e-07	2.15097
AC129492.1	0.000130449	1.15635
AC129492.7	1.50195e-20	2.78327
AC129510.1	0.000184687	2.08211
AC130304.1	0.00394193	0.774591
AC130324.2	0.173243	0.644622
AC130324.3	4.59971e-06	1.31406
AC130343.1	1.49596e-18	2.25596
AC130343.2	0.528468	0.140892
AC130456.4	0.00149259	1.29958
AC130462.3	0.000756242	0.96
AC130689.1	2.75402e-06	4.45264
AC131009.1	0.0599592	0.676671
AC131011.1	0.00429585	1.88682
AC131160.1	1.66196e-08	1.21719
AC131212.3	1.12556e-08	2.54246
AC131235.2	0.14239	0.736091
AC131238.1	0.0016922	0.968333
AC131953.1	2.2495e-05	1.60652
AC132008.2	0.0194229	0.648956
AC132219.2	0.181541	0.454386
AC132812.1	2.89766e-07	1.98051
AC132872.1	0.0106484	0.830839
AC132872.3	1.26616e-06	1.43806
AC132872.4	0.00318451	0.823739
AC132872.5	1.8943e-05	2.0175
AC132938.4	0.083317	0.739373
AC132938.5	8.66732e-19	4.18985
AC133065.3	1.11751e-06	2.36145
AC133552.2	6.47698e-05	2.73967
AC133552.5	9.86843e-05	1.99209
AC133644.2	0.00814403	0.636899
AC134349.1	0.0197076	1.14384
AC135048.1	0.210274	0.384284
AC135048.2	0.00127928	1.78583
AC135048.4	3.80025e-05	1.24107
AC135050.1	3.57081e-31	3.03426
AC135050.2	0.130777	0.350245
AC135050.7	0.139587	0.368359
AC135178.4	9.98487e-08	1.63482
AC135507.1	0.00465532	0.679965
AC135586.2	1.57158e-06	1.09113
AC135721.1	0.00179023	1.68
AC135782.3	0.0322731	0.810782
AC136297.1	2.79376e-13	2.93273
AC136475.1	6.39033e-07	2.14116
AC136475.2	0.0379019	0.836995
AC136475.3	0.0349671	0.657586
AC137590.1	0.00841274	1.59875
AC137630.4	0.0438256	0.964653
AC137695.3	3.44626e-06	2.27759
AC137834.1	0.00270012	0.640389
AC137834.2	0.0329938	0.496334
AC137932.3	3.89537e-08	1.6346
AC138028.2	0.394839	0.305253
AC138028.3	0.132383	0.718156
AC138028.4	0.8514	0.0589787
AC138028.6	0.00274258	0.719641
AC138150.1	1.70498e-05	1.64653
AC138150.2	9.35379e-16	2.19451
AC138207.3	0.0184736	0.863695
AC138207.4	0.00277865	1.31748
AC138207.9	0.00371809	1.18799
AC138696.1	6.0078e-21	2.11889
AC138776.1	0.265924	0.529035
AC138811.1	0.000159697	0.974861
AC138894.1	0.238586	0.319773
AC138904.1	4.64012e-24	2.52269
AC138904.3	0.00841274	1.59875
AC138932.1	0.0700807	0.492363
AC138969.1	0.00128926	1.86058
AC138969.2	0.0768534	0.963092
AC139019.1	0.0276232	0.684027
AC139100.1	2.29554e-05	1.51844
AC139256.1	0.163084	0.672536
AC139530.1	2.60044e-07	1.34224
AC139530.2	0.00970944	0.544514
AC139769.1	1.88365e-08	1.48034
AC139795.1	5.54842e-13	1.91763
AC139795.2	1.66168e-10	1.73481
AC139887.1	0.214146	0.462578
AC139887.2	0.0696585	0.46366
AC140504.1	1.02238e-05	1.00018
AC141424.1	5.37008e-10	1.75082
AC141586.1	7.09641e-25	2.36035
AC141586.3	3.54959e-07	1.42772
AC142472.1	0.000254269	1.22762
AC144652.1	2.56568e-08	2.0374
AC145098.1	0.000610301	1.74691
AC145207.2	0.205143	0.294102
AC145207.4	0.506835	0.184969
AC145207.8	0.0976896	0.39927
AC145423.3	0.00903825	1.6686
AC147067.1	2.04767e-06	2.71735
AC211429.1	0.952126	0.0227655
AC211433.1	0.451823	0.16867
AC226119.1	5.1629e-10	3.44866
AC231533.1	8.01347e-23	2.53324
AC231657.3	0.0439855	0.506071
AC232271.3	0.113782	0.784792
AC233702.7	0.0195301	1.33753
AC233723.2	5.09224e-14	1.98818
AC233992.1	0.342673	0.229951
AC234582.2	0.0174197	1.30805
AC234917.2	0.448914	0.203211
AC234917.3	0.720149	0.0887019
AC241377.3	8.61633e-06	1.05602
AC241585.2	0.00841274	1.59875
AC242628.1	0.000343452	0.924025
AC242842.2	0.00275824	1.76148
AC242842.3	0.435238	0.198461
AC243547.2	0.0285161	1.18385
AC243964.4	0.143356	0.439648
AC244517.10	6.5758e-07	1.31866
AC244517.2	0.0100683	1.44395
AC244517.4	4.41464e-20	2.58959
AC244517.5	7.91963e-26	2.64335
AC244517.6	3.95953e-13	1.85611
AC244517.8	1.10052e-07	1.43086
AC245052.4	0.6816	0.0890281
AC245096.1	3.61809e-06	3.69704
AC245100.1	0.000819566	2.11698
AC245100.7	0.00287911	1.24497
AC245297.3	0.0274102	0.619903
AC245748.1	0.0275804	0.628062
AC254629.1	0.153022	0.540911
ACAA1	0.00476906	0.611699
ACAA2	0.150726	0.30561
ACACA	0.0863664	0.358811
ACACB	0.294645	0.296811
ACAD10	0.0112331	0.725053
ACAD11	0.430972	0.196666
ACAD8	1.69906e-11	1.52676
ACAD9	0.000322719	0.794176
ACADS	1.01337e-05	1.12369
ACADSB	0.302507	0.222472
ACADVL	0.00288344	0.625053
ACAP1	0.00213353	0.944921
ACAP3	0.00440712	0.682838
ACAT1	0.718323	0.0760326
ACBD3	0.00139979	0.673933
ACBD3-AS1	0.0261873	0.517845
ACBD4	0.154899	0.415673
ACBD6	0.596274	0.116969
ACER2	9.04953e-07	1.2472
ACHE	7.38379e-10	1.64649
ACLY	0.0775225	0.365372
ACMSD	0.00764597	1.24872
ACO1	0.113448	0.344329
ACO2	2.30382e-06	1.00381
ACOT1	5.86644e-11	1.88725
ACOT11	0.0651021	0.758372
ACOT2	2.20877e-19	2.05678
ACOT7	0.073362	0.375311
ACOT8	0.00571526	0.727113
ACOT9	0.942494	0.0164914
ACOX3	4.75547e-08	1.39127
ACP2	0.0666289	0.452897
ACP6	0.508522	0.164444
ACP7	0.00109462	0.719507
ACSBG2	1.33121e-06	2.75201
ACSF2	0.0058516	0.660488
ACSF3	4.55795e-06	1.08684
ACSL3	0.510017	0.137607
ACSL4	0.958894	0.0114451
ACSS2	0.057072	0.434362
ACTB	0.0504827	0.400562
ACTG1	0.00431155	0.585456
ACTG1P1	3.78178e-07	3.00923
ACTG1P20	0.00182283	2.14404
ACTL10	0.00151521	1.15122
ACTN1	0.00853934	0.542642
ACTN4	0.00351305	0.603683
ACTR10	0.637309	0.113143
ACTR1A	0.00299051	0.623794
ACTR3C	3.11061e-27	2.59827
ACTR5	1.18534e-18	2.03656
ACTR6	0.412481	0.202696
ACTR8	0.226076	0.276268
ACTRT3	2.05613e-26	2.83095
ACVR1	1.37044e-06	1.0691
ACVR1B	1.02396e-08	1.25957
ACVR2A	1.28742e-05	1.05363
ACVR2B	0.0875977	0.375865
ACVR2B-AS1	0.0124967	1.24253
ACY1	0.0263386	0.535626
ADAM11	0.00797267	0.967273
ADAM1A	8.90519e-06	1.56635
ADAMTS13	0.108144	0.680775
ADAMTS17	2.4095e-06	3.06031
ADAMTS6	0.470647	0.209483
ADAMTS9	0.134365	0.447243
ADAMTSL5	0.0290103	0.630226
ADAP1	1.63328e-05	1.02657
ADAR	0.261702	0.232593
ADARB1	7.76559e-11	1.47144
ADAT1	6.28408e-09	1.2532
ADAT3	0.000713538	1.19516
ADCK1	0.346101	0.234878
ADCK2	1.71848e-26	2.38609
ADCK5	0.000387717	1.2044
ADCY3	6.87784e-05	0.836928
ADCY6	0.353691	0.206485
ADCY7	1.81177e-08	1.20257
ADCY9	6.30899e-11	1.42057
ADGRA2	3.0771e-07	1.4346
ADGRA3	0.000662372	0.729116
ADGRB1	0.00718023	1.49435
ADGRB2	3.74861e-09	1.54412
ADGRG5	0.00917563	0.902331
ADGRL1	1.90264e-07	1.10309
ADH5	0.0985721	0.346202
ADIPOR2	0.000982409	0.686802
ADIRF-AS1	0.00073742	0.776215
ADM	2.60451e-07	1.25982
ADNP	3.75668e-14	1.59362
ADNP2	5.30448e-33	2.63035
ADNP-AS1	0.483743	0.382493
ADO	6.54632e-29	2.47514
ADORA1	6.2613e-24	2.41951
ADORA2A	4.57083e-05	1.79474
ADORA2B	7.23879e-28	2.69679
ADPGK	3.14403e-07	1.08436
ADPGK-AS1	0.00110169	0.760451
ADPRH	0.0622184	0.744802
ADPRM	0.000336487	0.859308
ADPRS	2.0972e-26	2.37161
ADRA2C	2.95077e-05	3.47572
ADRB1	1.23973e-05	1.71416
AEN	0.00333012	0.621371
AF001548.2	0.000577021	1.61328
AF111167.2	1.63221e-11	2.57297
AF111169.1	0.0117205	1.0607
AF111169.4	0.0443355	0.752021
AF117829.1	2.80464e-11	1.67542
AF127577.1	0.617782	0.252311
AF127577.4	1.13531e-12	1.91439
AF131215.5	0.00313104	0.757266
AF131215.6	0.180393	0.552698
AF196969.1	0.332614	0.228829
AF230666.1	0.153916	0.375136
AF235103.1	1.62204e-37	3.01102
AF235103.3	1.46254e-07	3.28782
AF241726.2	0.037649	0.583853
AF241728.2	0.000126105	2.91905
AFAP1	0.00176308	0.73567
AFAP1-AS1	0.00255784	0.755547
AFDN	0.0494579	0.413341
AFF1	6.54165e-07	1.0543
AFG1L	0.938302	0.0765
AFG3L1P	0.00266768	0.651711
AFG3L2	0.0465628	0.410418
AFMID	0.49116	0.171907
AFTPH	9.51326e-23	2.12066
AGAP1	6.82687e-05	0.848704
AGAP11	0.0101184	1.21137
AGAP12P	9.82733e-05	2.36104
AGAP2	5.60783e-35	2.78444
AGAP2-AS1	3.5616e-36	2.84034
AGAP3	0.000330146	0.7541
AGAP4	0.000238998	0.946734
AGAP5	7.73197e-05	1.18072
AGAP6	0.000823923	0.815643
AGAP9	0.00623239	0.722743
AGK	0.774994	0.0652647
AGMAT	0.00997216	0.582872
AGO2	0.135739	0.307819
AGPAT2	3.95662e-07	1.07664
AGPAT3	3.81707e-11	1.39411
AGPAT4	0.0175275	0.606814
AGPAT5	0.25208	0.241513
AGRN	0.406008	0.187367
AHCTF1	0.000118373	0.804287
AHCYL2	0.979008	0.00857646
AHDC1	5.48343e-11	1.70552
AHNAK	1.19004e-07	1.09546
AHNAK2	2.26249e-08	1.39139
AHRR	4.69146e-07	1.89996
AHSA1	0.241411	0.242227
AIFM1	0.0147058	0.51044
AIFM2	0.000213941	0.778612
AIP	0.733946	0.0756529
AJ003147.2	4.12517e-06	1.64676
AJM1	0.000302958	0.929102
AJUBA	1.06285e-07	1.20509
AK7	0.00170691	0.946436
AKAP1	9.09493e-12	1.44032
AKAP10	6.64883e-05	0.859279
AKAP11	0.0418768	0.426883
AKAP12	0.0376855	0.444286
AKAP13	6.73188e-08	1.14026
AKAP17A	4.29691e-17	1.85146
AKAP3	2.5378e-07	1.33002
AKAP5	9.79054e-10	1.52615
AKAP6	0.025771	0.673843
AKAP7	0.0844032	0.468343
AKAP8	1.99285e-07	1.10858
AKAP8L	0.116816	0.343824
AKAP9	0.712704	0.0776106
AKNA	0.00049884	0.85318
AKR7A3	0.333639	0.314425
AKT1	0.594322	0.110828
AKT2	1.105e-07	1.16418
AL009179.1	1.39515e-06	1.46416
AL020996.3	0.0251041	0.63764
AL021368.4	1.05711e-17	2.40919
AL021546.1	0.47777	0.150323
AL021707.3	0.0595211	0.760875
AL021707.5	0.0599781	0.853309
AL021707.6	0.000205848	1.92017
AL021918.4	7.27891e-15	1.83974
AL021997.3	4.35362e-10	1.48128
AL022312.1	9.51296e-24	2.26874
AL022318.4	0.422597	0.278245
AL022322.2	0.406933	0.441084
AL022323.1	0.000441599	1.00385
AL022328.2	0.12646	0.598575
AL022328.4	2.41739e-06	1.59196
AL022345.4	0.000156542	1.78318
AL023584.1	4.10703e-12	1.86131
AL024498.1	2.66661e-08	2.38096
AL031118.1	2.4095e-06	3.06031
AL031123.2	1.90654e-07	1.90564
AL031123.3	3.21681e-11	2.18459
AL031281.1	2.14483e-21	3.43505
AL031282.1	0.000156954	1.62604
AL031282.2	0.22075	0.295805
AL031315.1	0.00176486	0.856489
AL031432.2	0.0120982	1.54016
AL031587.5	0.429135	0.240318
AL031591.1	4.86861e-12	1.77222
AL031591.2	0.0339961	1.05671
AL031600.3	0.000792038	0.839719
AL031670.1	0.26209	0.341289
AL031708.1	0.000464617	0.788621
AL031716.1	0.00040416	1.99753
AL031772.1	6.41321e-31	2.86606
AL031778.1	2.31642e-06	2.47514
AL031848.2	0.527753	0.31609
AL031963.1	0.0495232	0.514602
AL031963.3	0.124294	0.608415
AL031985.3	0.402221	0.218847
AL033384.2	0.0927867	0.520664
AL033397.2	0.167258	0.387859
AL033528.3	1.50376e-08	1.90819
AL033529.1	4.40992e-07	1.15694
AL035252.3	0.0139996	1.11643
AL035252.4	0.00159636	1.31285
AL035427.1	0.000188763	1.01192
AL035448.1	1.32848e-23	2.74272
AL035458.2	0.0693385	0.509794
AL035461.2	0.141576	0.800844
AL035530.2	0.00241842	1.38915
AL035587.2	0.340904	0.372957
AL035658.1	0.14239	0.736091
AL049569.1	0.401928	0.208851
AL049569.3	0.384562	0.227109
AL049629.2	0.0147293	0.529185
AL049780.1	0.034501	0.607666
AL049795.1	1.12001e-05	1.27361
AL049795.2	0.0129566	0.549882
AL049840.6	0.120229	0.615396
AL049844.1	0.548481	0.132781
AL049844.3	0.868326	0.0359361
AL049869.1	0.00834208	1.37569
AL049872.1	0.129425	0.848196
AL050331.1	4.21029e-08	1.9259
AL050341.2	1.72427e-16	2.12543
AL050343.2	0.129859	0.553372
AL078459.1	1.24396e-08	1.28971
AL078644.1	7.67958e-05	2.97764
AL080276.2	0.326798	0.218382
AL080317.2	0.117059	0.536457
AL096701.4	0.580767	0.305008
AL096794.1	2.27396e-07	7.63609
AL109627.1	0.000850314	1.01342
AL109761.1	0.00470459	1.34109
AL109804.1	0.00655998	1.06597
AL109811.1	0.271073	0.273023
AL109811.3	5.72376e-05	0.840206
AL109827.1	1.23707e-14	1.67695
AL109918.1	7.63883e-10	1.56571
AL109976.1	6.47698e-05	2.73967
AL110118.2	0.171478	0.295385
AL110504.1	1.54862e-12	2.00776
AL117209.1	0.887341	0.0869421
AL117327.1	0.013628	0.99478
AL117339.4	7.93794e-20	2.06219
AL117344.2	0.793446	0.153369
AL117348.2	0.027022	0.499593
AL118506.1	7.57846e-30	2.64354
AL118511.1	0.185876	0.306691
AL118516.1	1.53327e-09	1.44959
AL118558.1	0.0269218	0.515815
AL118558.3	1.29049e-10	1.69926
AL121581.2	3.24426e-30	3.89301
AL121594.1	0.649947	0.0947099
AL121603.2	2.25625e-05	1.02485
AL121753.1	0.0070731	0.642388
AL121753.2	0.250541	0.409547
AL121758.1	4.60395e-35	2.70822
AL121820.1	0.0101038	1.01717
AL121820.3	0.15351	0.438648
AL121832.3	0.000254748	2.14282
AL121845.2	0.0981134	0.598371
AL121845.3	2.9877e-24	2.32119
AL121928.1	0.0430574	0.488242
AL121944.2	1.63779e-06	1.15134
AL122010.1	0.19175	0.373417
AL122035.1	0.00814403	0.636899
AL122035.2	0.804545	0.0606506
AL132656.1	1.24618e-08	7.89791
AL132656.4	0.000303319	1.67723
AL132671.2	0.669552	0.107831
AL132780.2	4.55063e-06	1.20429
AL132800.1	2.71656e-17	2.71993
AL133153.1	0.000758987	2.26371
AL133215.2	0.00265213	0.982111
AL133216.2	0.254598	0.551891
AL133227.1	0.0348294	0.832042
AL133318.1	2.03408e-32	3.24421
AL133338.1	0.172865	0.353441
AL133351.4	4.12903e-17	1.86588
AL133353.2	0.526006	0.140669
AL133367.1	5.40502e-11	1.81387
AL133380.1	6.21505e-05	1.49602
AL133406.2	0.00041851	1.91462
AL133476.1	0.298038	0.470196
AL133477.1	0.00432459	1.32064
AL135744.1	5.64529e-05	2.20034
AL135925.1	5.468e-12	2.75321
AL135978.2	1.61663e-07	1.26727
AL135999.1	0.605362	0.147947
AL136038.4	3.46254e-26	2.71026
AL136038.7	3.85312e-06	3.01864
AL136040.1	2.35366e-11	3.46652
AL136116.3	3.03854e-05	1.36583
AL136131.3	2.26845e-11	1.96078
AL136162.1	2.77347e-10	3.33553
AL136171.2	0.416098	0.224588
AL136295.1	7.54033e-05	0.838398
AL136295.17	1.11798e-10	1.55959
AL136295.4	0.00557188	0.5824
AL136295.5	0.0239634	0.48803
AL136309.3	0.944462	0.0612709
AL136980.1	0.709013	0.1722
AL136981.4	0.0434466	0.683515
AL136988.1	0.0140612	0.922815
AL137002.2	1.10418e-09	2.37682
AL137058.2	1.39465e-17	2.07054
AL137060.1	0.178227	0.396296
AL137060.3	3.31373e-07	2.18291
AL137186.2	0.0198785	0.607486
AL137247.2	0.809307	0.139345
AL137779.2	0.000538084	2.16921
AL137802.2	4.7982e-05	1.49815
AL137802.3	0.000460449	1.27897
AL138478.1	0.317351	0.481924
AL138689.2	2.03076e-23	2.14246
AL138724.1	5.45133e-10	1.44795
AL138752.2	1.8713e-07	1.09199
AL138966.2	0.000214124	1.60319
AL138999.2	3.26293e-14	2.5161
AL139011.1	1.22707e-06	1.26716
AL139011.2	7.31496e-06	0.936627
AL139021.2	0.109361	0.529979
AL139099.1	2.02175e-38	2.86421
AL139184.1	3.92816e-12	2.94178
AL139220.2	0.0903745	0.831903
AL139243.1	7.82934e-05	1.46213
AL139246.5	0.591789	0.20184
AL139260.2	1.37232e-13	1.62555
AL139274.2	4.82185e-08	3.65299
AL139300.1	0.0821982	0.361705
AL139384.1	4.07669e-09	2.8273
AL139384.2	1.72431e-07	1.93391
AL139385.1	1.5283e-09	2.03359
AL139393.3	3.54748e-19	2.81444
AL139423.1	0.00051059	1.38023
AL139805.1	1.03095e-05	3.59062
AL157392.3	2.04557e-08	1.27033
AL157400.5	9.69535e-12	2.52313
AL157827.2	0.000195222	1.27458
AL157838.1	3.71666e-06	1.70751
AL157871.1	3.40765e-25	2.89904
AL157871.6	7.04473e-20	2.76815
AL157893.1	4.72753e-07	1.75913
AL157938.2	0.949004	0.0203792
AL158151.1	4.27603e-25	2.62288
AL158151.3	0.591959	0.119906
AL158206.1	0.0106484	0.830839
AL158212.3	0.906204	0.0725315
AL158214.2	0.061832	0.520469
AL158801.2	9.20433e-09	3.48429
AL158834.2	0.000382556	2.0972
AL158835.3	0.555449	0.278848
AL158847.1	0.561773	0.232039
AL160269.1	0.000164749	0.841334
AL160408.2	1.31697e-23	2.25365
AL161421.1	8.07472e-16	2.21676
AL161452.1	3.05969e-18	2.43752
AL161662.1	7.61212e-07	1.47036
AL161665.1	0.674599	0.119219
AL161668.3	0.267959	0.424143
AL161729.1	0.000236993	0.938577
AL161756.1	0.188261	0.536137
AL161772.1	9.10642e-38	3.03583
AL162171.2	0.000755019	1.20126
AL162258.2	0.254794	0.311624
AL162274.3	7.62379e-06	1.487
AL162377.1	0.180393	0.552698
AL162377.3	0.94322	0.0351096
AL162417.1	1.06143e-24	2.21864
AL162426.1	0.299181	0.432117
AL162431.1	3.65911e-14	1.98361
AL162458.1	0.196606	0.44387
AL162595.1	7.72391e-10	1.51549
AL162742.1	3.15852e-09	2.25551
AL162742.2	4.79239e-30	3.26106
AL163051.1	1.12694e-05	1.9858
AL353152.2	0.00285251	1.9479
AL353588.1	3.53998e-07	1.84933
AL353708.3	1.50705e-14	1.87768
AL353748.3	5.22751e-05	1.22105
AL353759.1	0.000159262	1.69852
AL353763.1	8.11531e-12	3.25371
AL353804.3	0.85386	0.073876
AL353804.5	0.164413	0.517789
AL353807.2	0.00829779	0.91395
AL353807.3	2.22427e-07	1.27654
AL354696.2	2.73538e-06	1.74717
AL354707.1	0.336846	0.408763
AL354733.3	0.575589	0.119863
AL354836.1	0.107309	0.426894
AL354855.1	0.000878105	1.76458
AL354864.1	0.00474394	0.647632
AL354892.2	3.7307e-08	2.36163
AL354956.1	0.905242	0.0372008
AL355001.2	3.65388e-17	3.76942
AL355075.3	0.0599557	0.398768
AL355297.3	1.46845e-09	3.24109
AL355310.2	0.000477897	0.918412
AL355312.3	0.130051	0.593648
AL355315.1	0.0314308	0.476235
AL355385.2	0.351834	0.214356
AL355388.2	0.772797	0.0668437
AL355483.1	0.356228	0.357871
AL355490.1	5.51295e-12	2.92653
AL355490.2	0.37983	0.490115
AL355574.1	1.8e-06	1.30354
AL355802.3	0.089514	0.441527
AL355922.2	2.32792e-07	3.2523
AL355987.1	1.33121e-06	2.75201
AL355987.2	2.53316e-05	0.898804
AL355987.3	0.919952	0.030886
AL355987.4	7.93549e-05	0.838855
AL356056.2	0.0305206	0.845904
AL356235.1	2.72448e-05	1.16654
AL356488.3	9.57325e-15	2.16443
AL356966.1	0.0140563	1.39172
AL357075.3	9.37918e-08	2.41716
AL357075.4	0.0752286	0.585442
AL357079.2	0.198709	0.428477
AL357153.3	0.171263	0.343289
AL357673.1	0.000540531	1.00606
AL357874.3	1.25559e-05	1.25425
AL358113.1	0.218866	0.297206
AL358115.1	0.436365	0.170815
AL358334.3	0.00897286	0.642743
AL358472.2	0.000294925	1.60615
AL358472.4	1.06421e-09	2.22148
AL358781.1	0.00809008	0.624092
AL358852.1	3.62217e-07	2.4407
AL359091.4	0.766176	0.125457
AL359092.3	1.09928e-11	2.67463
AL359094.2	0.335248	0.232703
AL359183.1	0.000115065	1.59607
AL359198.1	0.00117769	2.20511
AL359232.1	0.30792	0.418925
AL359258.2	0.0018614	0.731197
AL359258.3	0.000205848	1.92017
AL359513.1	0.00480939	1.1874
AL359643.2	1.19985e-05	2.11262
AL359736.1	9.76107e-24	2.24764
AL359834.1	2.28023e-05	1.4765
AL359852.1	0.00285251	1.9479
AL359918.2	0.00582377	1.65506
AL359921.1	0.00352053	1.02323
AL359922.1	0.356128	0.210212
AL359922.2	0.00134268	0.695256
AL359955.1	0.000103608	2.68745
AL360181.3	0.00548066	0.669895
AL365181.2	1.30758e-10	1.46019
AL365181.3	9.72969e-14	1.56543
AL365273.1	7.56006e-28	2.79808
AL365295.1	0.005121	1.36409
AL365330.1	6.05559e-05	0.985562
AL365356.1	0.864199	0.0627028
AL390719.1	3.22109e-34	2.77912
AL390719.2	4.35654e-09	2.38703
AL390726.2	1.87422e-19	2.50905
AL390726.3	0.00429585	1.88682
AL390728.4	1.07995e-17	1.96196
AL390728.5	1.43964e-07	1.6802
AL391056.2	2.7751e-34	2.85511
AL391121.1	0.0508179	0.629258
AL391650.1	1.20721e-09	1.34828
AL391839.2	0.812208	0.0753148
AL391863.1	0.47381	0.200886
AL441883.1	2.02834e-09	2.34648
AL441992.2	8.02781e-10	1.31
AL442003.1	0.0421421	0.895449
AL442067.3	9.86585e-06	2.93151
AL442663.3	0.0144973	1.06944
AL445231.1	4.25457e-06	1.90112
AL445423.3	0.00080496	0.822635
AL445524.2	0.15164	0.307246
AL445670.1	1.37546e-12	2.8657
AL445685.1	1.08798e-26	2.82583
AL445685.3	0.000977631	0.697543
AL449106.1	0.0189088	0.918055
AL450306.1	3.49687e-08	1.52249
AL450384.2	2.37312e-05	1.34833
AL450998.2	0.362818	0.349959
AL451062.3	3.15795e-05	0.920987
AL451070.1	0.539948	0.137191
AL451085.2	0.456052	0.248362
AL451123.1	1.75419e-05	1.60457
AL451164.2	0.551633	0.168495
AL451165.2	0.0293718	0.532973
AL512288.1	0.798397	0.145894
AL512353.1	3.0815e-32	2.86409
AL512356.1	0.270341	0.308003
AL512380.2	9.86843e-05	1.99209
AL512408.1	4.64484e-13	2.38898
AL512506.3	0.000173128	1.3315
AL512598.2	4.57778e-09	1.96562
AL512631.2	0.05607	0.921746
AL512785.2	0.000187418	1.22534
AL513165.1	0.474422	0.268545
AL513165.2	0.00591363	0.582604
AL513190.1	0.000126954	1.17952
AL513218.1	0.00773184	0.747875
AL513218.2	0.00241842	1.38915
AL513523.1	1.14745e-05	2.56973
AL513523.3	0.174464	0.537339
AL513523.4	0.256054	0.418206
AL513550.1	2.02124e-05	1.37456
AL583722.1	0.859643	0.0437392
AL589666.1	0.282933	0.229352
AL589765.4	0.779304	0.13125
AL590062.1	4.27797e-21	2.44153
AL590064.1	0.00952847	0.967123
AL590369.1	1.94942e-11	2.05986
AL590556.3	1.69082e-23	2.68012
AL590627.1	0.0553761	0.539201
AL590627.3	2.49222e-06	1.11137
AL590666.2	9.32061e-16	1.76298
AL590666.5	1.29932e-17	2.28269
AL590677.1	0.0678932	1.02113
AL590705.1	0.749201	0.165756
AL590822.2	0.00201959	0.777935
AL591684.2	0.462476	0.271814
AL592295.5	0.906204	0.0725315
AL592546.2	1.10421e-15	4.33736
AL596087.2	1.55196e-13	4.11814
AL596214.1	6.47698e-05	2.73967
AL603839.1	1.53814e-27	2.54618
AL603839.2	6.5028e-22	2.7824
AL603962.1	9.19915e-10	2.51252
AL604028.2	0.419497	0.419904
AL606489.1	0.419497	0.419904
AL606760.2	1.33527e-10	1.65082
AL627230.3	0.00041851	1.91462
AL627389.1	4.71373e-13	2.49995
AL627402.1	0.393728	0.464376
AL645465.1	0.164413	0.517789
AL645568.1	0.0529512	0.620848
AL645608.8	2.04478e-34	2.89166
AL645728.1	0.067924	0.722454
AL645929.1	0.0103045	0.714741
AL645933.2	2.22051e-24	3.58519
AL645933.3	0.803068	0.139004
AL645941.3	4.09459e-05	1.12789
AL662795.2	0.00140193	0.788227
AL662797.1	0.00993441	0.535559
AL662844.4	7.20608e-23	2.61538
AL662884.1	0.778291	0.10549
AL662899.1	0.58072	0.123541
AL662907.2	0.711532	0.191232
AL669830.2	0.000260895	0.792508
AL669841.1	0.0370978	1.22263
AL669914.2	0.0339197	0.965188
AL669914.3	0.0384848	0.964935
AL669918.1	0.0233379	0.472516
AL670729.1	8.67009e-13	1.81458
AL670729.3	7.34176e-06	2.04033
AL671710.1	0.0128911	0.789539
AL671762.1	0.00788683	0.578734
AL672142.1	0.462821	0.16766
AL672310.1	0.000602715	1.69648
AL691432.1	0.193122	0.595054
AL691432.2	2.89058e-14	2.41787
AL731571.1	1.75894e-09	1.57716
AL731577.2	8.92246e-33	2.77366
AL807752.2	3.31298e-11	1.73925
AL807752.3	3.22931e-19	2.28759
AL831711.1	6.83809e-21	4.35678
AL845552.2	1.48255e-10	4.47194
AL928654.1	1.91622e-15	1.96624
AL928654.2	0.000146677	1.0349
AL928654.3	0.0050477	1.05697
AL928654.4	2.2524e-21	3.20085
AL928711.1	0.838754	0.0914303
AL929472.3	8.6467e-24	2.32166
AL929602.1	0.00057344	2.05009
ALDH16A1	0.00220858	0.760018
ALDH18A1	0.000913531	0.698121
ALDH1A3	3.22939e-07	2.10309
ALDH1B1	1.44771e-38	2.87879
ALDH1L2	0.00108855	1.3111
ALDH2	0.0117239	0.537597
ALDH4A1	0.00010643	1.11112
ALDH5A1	0.793488	0.0601955
ALDH7A1	0.217016	0.258216
ALDH9A1	0.412297	0.172271
ALDOA	0.127529	0.313308
ALDOC	0.890639	0.0342886
ALG1	3.27114e-11	1.45978
ALG11	1.68096e-07	1.1081
ALG12	0.000146308	1.00081
ALG1L	5.78936e-27	4.63
ALG1L10P	8.34737e-06	2.14169
ALG1L11P	5.25415e-05	2.57264
ALG1L12P	4.99871e-05	3.41465
ALG1L13P	0.00404431	1.16982
ALG1L6P	5.49226e-08	1.61858
ALG1L7P	0.0110484	1.48758
ALG1L8P	4.79413e-11	8.31144
ALG1L9P	6.92491e-23	2.81328
ALG2	5.26632e-33	2.68573
ALKBH1	2.94232e-12	1.6769
ALKBH2	1.60313e-09	1.26925
ALKBH3	0.983872	0.00746575
ALKBH4	5.55386e-42	3.24453
ALKBH5	0.0542977	0.403482
ALKBH7	0.464834	0.201282
ALKBH8	0.00333061	0.637329
ALMS1	5.65762e-14	1.59152
ALOX12B	1.38067e-05	1.23303
ALPK1	1.22731e-12	1.63042
ALS2	1.15633e-14	1.68411
ALS2CL	0.0427259	0.573248
ALYREF	0.402392	0.177074
AMACR	4.08028e-13	1.69171
AMBRA1	7.78198e-23	2.20026
AMDHD2	0.232018	0.334733
AMER1	1.37263e-05	1.02954
AMIGO1	9.75594e-11	1.49814
AMIGO3	2.76662e-13	2.42871
AMMECR1L	1.271e-34	2.91869
AMOT	0.260526	0.396444
AMOTL1	0.00105761	0.900377
AMOTL2	2.3641e-14	1.63343
AMPD2	0.00505222	0.613999
AMPD3	0.0267834	0.514848
ANAPC1P2	0.542327	0.140905
ANAPC2	6.22381e-09	1.28054
ANAPC4	0.314381	0.229572
ANAPC7	0.000916136	0.710596
ANGEL1	0.00122571	0.713709
ANGPTL4	1.43025e-05	0.934412
ANGPTL6	0.0309752	0.609851
ANKFY1	2.33673e-08	1.19642
ANKH	0.00677936	0.586438
ANKHD1	0.507534	0.138253
ANKHD1-EIF4EBP3	0.501283	0.140272
ANKIB1	0.0761015	0.376478
ANKLE1	0.206011	0.666083
ANKLE2	0.000729424	0.69961
ANKMY1	2.48964e-11	1.75614
ANKRA2	0.917855	0.0282457
ANKRD10	4.36765e-08	1.24058
ANKRD11	0.000982159	0.68143
ANKRD12	0.762415	0.0703502
ANKRD13B	1.9257e-05	0.9656
ANKRD13D	0.00665575	0.630962
ANKRD16	2.27538e-08	1.32904
ANKRD17	0.119345	0.321367
ANKRD18A	5.57863e-06	1.07604
ANKRD18CP	6.31214e-06	1.50293
ANKRD18DP	6.47698e-05	2.73967
ANKRD18EP	4.12668e-06	1.53934
ANKRD19P	0.0434466	0.683515
ANKRD20A9P	0.00159636	1.31285
ANKRD23	0.907506	0.0368584
ANKRD24	0.00815017	1.04178
ANKRD26	0.223524	0.285478
ANKRD27	0.00232747	0.650596
ANKRD28	1.47157e-06	1.02318
ANKRD31	0.00201338	0.852844
ANKRD33B	2.81291e-39	3.05619
ANKRD34A	1.68255e-07	1.3464
ANKRD36	3.93243e-05	0.953504
ANKRD36C	1.07686e-26	2.36018
ANKRD37	0.377145	0.266052
ANKRD40	5.0843e-17	1.77714
ANKRD42	2.60042e-07	1.14085
ANKRD46	3.05785e-12	1.65445
ANKRD49	2.55876e-20	2.22766
ANKRD50	2.56928e-26	2.30945
ANKRD54	3.47115e-06	1.01318
ANKRD6	0.483743	0.382493
ANKRD9	1.93819e-18	2.19684
ANKS1A	0.000319356	0.780982
ANKS3	4.35409e-09	1.37809
ANKS6	0.00684943	0.565681
ANKZF1	0.00519113	0.629665
ANO10	0.0029622	0.706443
ANO7	0.00350849	1.01824
ANO8	0.0347228	0.554293
ANTKMT	0.129227	0.437045
ANTXR2	1.03253e-19	1.92663
ANXA1	0.109827	0.330111
ANXA2	0.844446	0.0403613
ANXA2P2	0.323614	0.30496
ANXA2R	6.42791e-15	2.66863
ANXA6	0.00531092	0.590783
AOC2	0.000120611	1.39903
AOC3	0.00323827	1.3553
AOPEP	4.07086e-13	1.78459
AOX1	0.298548	0.404578
AP000295.1	0.00018312	0.804456
AP000317.2	0.790339	0.0610455
AP000347.1	6.10863e-06	1.17869
AP000350.5	1.65417e-07	2.32447
AP000442.1	0.00669495	0.701865
AP000471.1	0.438914	0.307557
AP000487.1	0.139359	0.411349
AP000525.1	6.04382e-07	2.06416
AP000526.1	7.62103e-08	1.97917
AP000550.1	0.00118125	1.62272
AP000553.1	0.540518	0.226288
AP000580.1	2.1164e-05	1.70086
AP000593.3	0.0135748	0.736625
AP000640.1	0.193029	0.702151
AP000688.1	0.0533939	0.465294
AP000697.1	0.000165623	2.63326
AP000763.3	0.161589	0.443038
AP000763.4	0.0233109	0.589218
AP000769.1	1.43699e-33	2.74874
AP000777.2	0.0199194	0.499709
AP000781.1	0.281592	0.227242
AP000787.1	0.00621651	1.03499
AP000866.1	4.93146e-05	1.5697
AP000866.2	0.000302407	1.82068
AP000866.5	0.186967	0.343924
AP000873.1	1.76173e-10	2.42845
AP000873.3	1.11751e-06	2.36145
AP000879.1	3.22955e-57	3.83194
AP000880.1	6.40444e-05	2.40527
AP000892.4	3.81356e-06	1.09822
AP000894.4	0.203903	0.534757
AP000942.2	7.56589e-06	0.992509
AP000943.2	5.4927e-13	2.32825
AP000944.5	3.21777e-08	1.20722
AP001029.2	0.80971	0.0999972
AP001042.1	0.350075	0.427289
AP001054.1	4.53722e-08	1.79531
AP001062.1	1.74471e-05	1.42965
AP001062.3	1.14762e-05	2.34428
AP001065.3	1.82808e-10	2.59214
AP001107.4	0.711151	0.0857763
AP001107.6	0.0428408	0.78109
AP001107.9	4.85624e-07	1.48133
AP001160.1	1.42508e-05	1.03209
AP001160.3	5.08566e-06	1.52687
AP001178.2	0.244899	0.460093
AP001273.1	0.568105	0.226995
AP001273.2	0.375258	0.192128
AP001318.1	1.37522e-22	2.84654
AP001318.2	0.0352893	0.57071
AP001372.2	1.02548e-26	3.35023
AP001453.2	1.47959e-12	2.07848
AP001458.1	0.000287197	1.95512
AP001458.2	0.629701	0.108662
AP001469.3	0.00665299	0.786448
AP001496.2	1.89467e-16	2.30789
AP001505.1	0.000313333	2.3742
AP001527.2	6.28122e-05	1.12673
AP001610.2	0.165924	0.33219
[truncated: 7,885 more rows]
